# Supplementary material for: Remodeling Translation Primes CD8+ T-cell Antitumor Immunity
Source: Oxford University Press journal article supplement (doi:10.1158/2326-6066.cir-19-0516), 2020-02-19
Supplement: 23266066cir190516-sup-225245_2_supp_6039048_q4hkkt.xlsx [file 23266066cir190516-sup-225245_2_supp_6039048_q4hkkt.xlsx]

## Sheet: S.Table 1 Protein Groups
Majority protein IDs	Protein names	Gene names	Log2 Fold Change ( IL15-IL2)	-Log10 pval	t-test pval	t-test pval <0.05	t-test q-value (Permutation based correction)	t-test Significant, Permuation based FDR 5%, and fold change S0 parameter of 0.1	LFQ normalized Log2 Protein Intensity IL15_1	LFQ normalized Log2 Protein Intensity IL15_2	LFQ normalized Log2 Protein Intensity IL15_3	LFQ normalized Log2 Protein Intensity IL15_4	LFQ normalized Log2 Protein Intensity IL15_5	LFQ normalized Log2 Protein Intensity IL2_1	LFQ normalized Log2 Protein Intensity IL2_2	LFQ normalized Log2 Protein Intensity IL2_3	LFQ normalized Log2 Protein Intensity IL2_4	LFQ normalized Log2 Protein Intensity IL2_5	Peptides	Razor + unique peptides	Unique peptides	Sequence coverage [%]	Unique + razor sequence coverage [%]	Unique sequence coverage [%]	Mol. weight [kDa]	Q-value	Score	Intensity	MS/MS count	LFQ intensity IL15_1A	LFQ intensity IL15_1B	LFQ intensity IL15_1C	LFQ intensity IL15_2A	LFQ intensity IL15_2B	LFQ intensity IL15_2C	LFQ intensity IL15_3A	LFQ intensity IL15_3B	LFQ intensity IL15_3C	LFQ intensity IL15_4A	LFQ intensity IL15_4B	LFQ intensity IL15_4C	LFQ intensity IL15_5A	LFQ intensity IL15_5C	LFQ intensity IL15_5D	LFQ intensity IL2_1A	LFQ intensity IL2_1B	LFQ intensity IL2_1C	LFQ intensity IL2_2A	LFQ intensity IL2_2B
Q8BGQ7	Alanine--tRNA ligase, cytoplasmic	Aars	-0.65544	2.64135	0.00228374	+	0.00581643	+	22.8358	22.4611	22.4122	22.5788	22.5027	23.5034	23.5437	23.0774	22.9292	23.014	11	11	11	16.6	16.6	16.6	106.91	0	32.233	245390000	38	22.889	22.7704	22.848	22.6357	22.0603	22.6873	22.3637	22.5583	22.3145	22.4349	22.7607	22.5408	22.3415	22.8588	22.3077	23.324	23.5268	23.6594	23.577	23.6007
P61222	ATP-binding cassette sub-family E member 1	Abce1	-0.552379	4.33775	4.59466e-05	+	0.00225243	+	22.0769	22.015	21.8631	21.8703	21.7143	22.4605	22.5569	22.4014	22.4746	22.4081	6	6	6	13.2	13.2	13.2	67.314	0	7.1093	144960000	31	22.5485	21.7922	21.8901	22.0214	21.9591	22.0645	21.4359	22.0392	22.1142	21.8012	21.6035	22.2061	21.9151	21.5964	21.6313	22.0939	22.8161	22.4713	22.6212	22.6304
E9Q9Q7;E9Q9D1;E9Q9D2;E9Q030;E9Q9C7;E9Q9C4;E9Q9C0;E9Q9C1;E9Q9C2;E9QK41;Q8K4G5-3;Q8K4G5-4;Q8K4G5-2;Q8K4G5	Actin-binding LIM protein 1	Ablim1	0.594535	4.46837	3.4012e-05	+	0.00154217	+	21.8352	21.9239	21.6002	21.7419	21.6762	21.2043	21.156	21.1057	21.2971	21.0416	2	2	2	5	5	5	45.883	0	2.2862	87815000	16	21.6383	22.0677	21.7997	21.7299	22.059	21.9829	21.659	21.5625	21.579	21.8043	21.6006	21.8207	21.8649	21.6232	21.5404	21.4028	21.1891	21.0211	21.3221	20.9582
A0A1W2P7X0;E9QMV2;Q4KML4	Costars family protein ABRACL	Abracl	0.434851	2.40262	0.0039571	+	0.0158222	+	23.3223	23.2232	23.2479	23.709	23.5049	23.0429	22.7403	22.998	22.9779	23.0738	4	4	4	66.7	66.7	66.7	6.4374	0	11.224	269320000	10	23.2469	23.2128	23.507	NaN	23.1114	23.3351	22.8906	NaN	23.6052	23.6072	23.9808	23.539	23.4907	23.5743	23.4496	23.0864	23.1538	22.8887	22.8402	22.8294
Q921H8;H3BKL5;Q8VCH0;H3BJZ9	3-ketoacyl-CoA thiolase A, peroxisomal;3-ketoacyl-CoA thiolase B, peroxisomal	Acaa1a;Acaa1b	0.41649	1.84387	0.0143261	+	0.0300931	+	21.3356	21.7185	21.4661	21.3803	21.2356	20.7148	21.328	20.8573	21.1174	21.0364	4	4	4	14.4	14.4	14.4	43.953	0	4.0216	77603000	11	21.1986	21.6801	21.1282	21.7115	21.96	21.484	21.5162	21.457	21.4251	21.5336	21.2533	21.3541	21.0737	21.4089	21.2243	20.453	21.0346	20.6568	21.2788	21.079
Q8JZN5	Acyl-CoA dehydrogenase family member 9, mitochondrial	Acad9	0.54119	2.74922	0.00178148	+	0.00746888	+	20.2933	19.7488	20.0441	19.9176	20.1549	19.5079	19.7092	19.3735	19.5585	19.3037	4	4	4	7	7	7	68.721	0	3.7797	26941000	14	20.4187	20.1291	20.3322	20.0213	19.786	19.4391	19.9703	20.3988	19.7633	20.5224	19.653	19.5773	20.1636	20.4292	19.8718	19.4936	19.4327	19.5974	19.7682	19.6907
A0A0R4J083;P51174	Long-chain specific acyl-CoA dehydrogenase, mitochondrial	Acadl	0.424334	2.29777	0.00503772	+	0.0183351	+	24.9459	25.0629	25.1444	24.9552	24.9167	24.2204	24.7472	24.5401	24.8043	24.5914	7	7	7	20.5	20.5	20.5	47.896	0	54.043	877390000	81	24.8792	24.8878	25.0708	25.1811	24.9679	25.0396	25.0977	25.0723	25.2631	24.8776	24.9023	25.0856	24.9945	24.9782	24.7775	24.539	23.9895	24.1327	24.6404	24.7664
P45952	Medium-chain specific acyl-CoA dehydrogenase, mitochondrial	Acadm	0.7971	3.37779	0.000418998	+	0.00189011	+	20.5226	20.8051	20.9429	20.5327	20.6751	19.4599	19.9811	20.0896	20.0143	19.948	2	2	2	5.9	5.9	5.9	46.481	0	5.0098	39698000	27	20.5137	20.4911	20.5629	20.8366	20.5096	21.0692	20.8994	20.9828	20.9464	20.5872	20.3233	20.6876	20.6539	20.8618	20.5096	19.1724	19.7473	NaN	20.2115	19.8686
Q07417	Short-chain specific acyl-CoA dehydrogenase, mitochondrial	Acads	0.439073	3.31415	0.000485116	+	0.00770732	+	22.1853	22.413	22.2479	22.1724	22.2677	21.6149	21.9964	21.8928	21.8402	21.7466	5	5	5	19.4	19.4	19.4	44.889	0	5.8532	137690000	35	22.073	22.3075	22.1754	22.3095	22.3332	22.5962	22.446	22.2441	22.0537	22.1381	22.1189	22.2601	22.2163	22.3714	22.2155	21.5864	21.6301	21.6283	22.5058	21.7393
B1AR28;P50544	Very long-chain specific acyl-CoA dehydrogenase, mitochondrial	Acadvl	0.743214	4.30109	4.99931e-05	+	0.000625	+	21.439	21.3707	21.5626	21.3244	21.0907	20.4443	20.5551	20.6813	20.7587	20.6319	5	5	5	7.6	7.6	7.6	68.55	0	4.3503	64639000	28	21.476	21.4449	21.396	21.3844	21.3346	21.393	21.497	21.7587	21.4321	21.485	21.0997	21.3885	21.1311	20.9261	21.2148	20.3826	20.6086	20.3417	20.7115	20.5391
Q8QZT1	Acetyl-CoA acetyltransferase, mitochondrial	Acat1	0.605125	2.12712	0.0074625	+	0.0124759	+	23.7456	23.9504	24.3406	24.4768	24.0657	23.2657	23.7581	23.3924	23.3565	23.7808	9	9	9	34	34	34	44.816	0	31.13	474790000	38	23.9343	24.2554	23.0473	23.6976	24.0194	24.1341	24.2698	24.4978	24.2542	24.4097	24.4069	24.6137	24.1698	24.2964	23.7309	23.2561	22.9495	23.5914	23.8564	23.871
F6RJ39;Q9JIX8-4;Q9JIX8;Q52KR6;B8JJ92;B8JJ91;Q9JIX8-3;Q9JIX8-2	Apoptotic chromatin condensation inducer in the nucleus	Acin1	0.555577	5.20005	6.30889e-06	+	0.00133333	+	23.1371	22.9119	23.0007	23.0341	22.9005	22.427	22.5476	22.4336	22.3525	22.4458	6	6	6	8.1	8.1	8.1	143.54	0	8.1854	215720000	13	23.1144	22.859	23.438	22.991	22.9921	22.7527	22.9074	23.3281	22.7665	22.841	22.6686	23.5927	22.8342	22.9962	22.8711	22.5563	22.5689	22.1558	22.9674	21.6178
Q3V117;Q91V92;Q3TS02	ATP-citrate synthase	Acly	-0.897579	4.91428	1.2182e-05	+	0.000285714	+	24.243	24.5786	24.065	24.3151	24.1965	25.2572	25.1079	25.1628	25.0761	25.2821	14	14	14	17.3	17.3	17.3	120.79	0	323.31	865330000	118	24.2413	24.2289	24.2588	24.2989	24.8777	24.5591	23.8982	24.0723	24.2244	24.2825	24.1685	24.4944	24.2429	24.0852	24.2615	25.0806	25.5536	25.1374	25.1501	25.0396
D3YVN1;A0A0A6YWG8;Q9Z2N8	Actin-like protein 6A	Actl6a	0.713044	2.20489	0.00623896	+	0.00795402	+	21.916	21.8132	21.8867	22.2633	21.8947	21.4556	21.7656	20.7133	21.189	21.0852	5	5	5	42.2	42.2	42.2	23.122	0	14.79	102730000	25	NaN	22.2394	21.5925	21.9045	21.8152	21.72	21.8597	21.3881	22.4122	22.3263	22.0822	22.3816	21.8605	21.5232	22.3005	20.9073	22.1247	21.3349	21.5793	21.841
A1BN54;Q7TPR4	Alpha-actinin-1	Actn1	1.52354	3.69767	0.0002006	+	0.000258065	+	21.9144	21.7323	22.0949	21.2526	21.3332	NaN	19.7627	20.2491	20.2912	20.2649	13	3	3	17.9	4.1	4.1	102.72	0	4.6534	65497000	18	22.0219	22.0989	21.6225	21.637	21.9442	21.6158	22.2324	21.9999	22.0524	21.5173	NaN	20.9879	21.1677	21.174	21.6579	NaN	NaN	NaN	20.4435	NaN
P57780;A0A1L1SV25;E9Q2W9	Alpha-actinin-4	Actn4	0.463097	5.11319	7.70559e-06	+	0.00242857	+	26.714	26.9257	26.7746	26.7961	26.8277	26.323	26.4401	26.3168	26.2666	26.3761	38	38	27	61.5	61.5	46.8	104.98	0	323.31	3129900000	295	26.7362	26.6944	26.7112	26.9361	26.874	26.9672	26.8405	26.7329	26.7503	26.7108	26.7634	26.9139	26.7948	26.7494	26.939	26.3329	26.3731	26.263	26.4564	26.4117
P61161	Actin-related protein 2	Actr2	0.325061	2.60999	0.00245475	+	0.0252706	+	26.1489	26.358	26.141	26.1653	26.1166	26.0477	25.7762	25.8816	25.691	25.908	13	13	13	54.1	54.1	54.1	44.76	0	278.41	2029600000	90	25.9533	26.3121	26.1813	26.3179	26.3796	26.3765	26.1707	26.1571	26.0952	26.086	26.1443	26.2656	26.0603	26.2042	26.0855	26.0679	26.1038	25.9714	25.9157	25.7776
Q99JY9	Actin-related protein 3	Actr3	0.395309	4.96351	1.08766e-05	+	0.00409091	+	26.2337	26.3655	26.2732	26.2779	26.1843	25.9659	25.8764	25.827	25.8843	25.8043	20	20	20	64.4	64.4	64.4	47.357	0	252.35	2300000000	123	26.1178	26.4317	26.1514	26.2762	26.3643	26.4559	26.2802	26.3443	26.195	26.1669	26.1849	26.482	26.1878	26.0184	26.3467	25.8823	26.0338	25.9816	25.8488	25.7968
F8WHZ9;F8WGR0;Q9QYC0-2;Q9QYC0;E9Q1K3	Alpha-adducin	Add1	0.855975	3.08324	0.000825576	+	0.0024381	+	22.1396	22.3083	21.6327	21.9749	21.9404	21.1379	21.5485	20.8191	21.0136	21.1969	6	6	6	16.3	16.3	16.3	73.163	0	7.0748	103840000	17	21.9252	22.0718	22.4219	22.37	22.5353	22.0195	21.9839	21.2501	21.6641	21.6575	22.003	22.2644	21.5197	22.246	22.0553	21.0856	21.2864	21.0418	21.3842	20.8413
Q9QYB5-2;Q9QYB5	Gamma-adducin	Add3	0.646147	2.1031	0.00788671	+	0.0117037	+	21.7822	21.5533	21.9488	22.1219	21.2268	20.9298	20.8829	21.1185	21.0413	21.4298	4	4	4	7.3	7.3	7.3	75.406	0	13.268	89192000	29	21.4374	21.6176	22.2914	21.8001	21.5215	21.3384	21.6026	22.1051	22.1386	22.4324	22.4951	21.4382	21.963	20.4905	NaN	20.9203	20.973	20.8962	21.1309	19.8724
Q9DC42;A0A0D9SEG8;E9QMJ5;E9QJS7;Q9Z0M6-2;Q9Z0M6-3;Q9Z0M6	CD97 antigen	Adgre5;Cd97	1.34537	2.4583	0.003481	+	0.00265517	+	21.9883	20.2963	21.8807	21.1971	21.7336	20.041	20.2242	19.68	20.2095	20.2146	5	5	5	8.7	8.7	8.7	80.202	0	5.9679	68528000	16	21.8043	22.0983	22.0625	20.8078	18.8915	21.1896	21.7131	22.0932	21.8359	21.6366	22.2263	19.7284	21.8403	21.8953	21.4653	20.0389	20.5303	19.5537	20.0522	20.5865
P50247	Adenosylhomocysteinase	Ahcy	-0.44743	4.10191	7.90847e-05	+	0.00417877	+	24.833	24.8343	24.8473	24.6498	24.7626	25.404	25.1933	25.2588	25.1184	25.1898	11	11	11	38.4	38.4	38.4	47.688	0	29.875	1044700000	95	24.8114	24.6959	24.9917	24.7156	24.8479	24.9394	25.359	24.6098	24.5732	24.651	24.6404	24.658	24.7729	24.7697	24.7452	25.3633	25.5883	25.2604	25.3737	25.1423
E9Q616		Ahnak	0.81048	2.92621	0.0011852	+	0.0031875	+	24.8168	24.5401	24.2679	24.8739	24.7932	24.044	23.8767	23.7509	23.4427	24.1251	26	26	26	18.1	18.1	18.1	604.25	0	49.14	650130000	67	24.7508	24.7784	24.9211	24.6559	24.929	24.0355	24.522	24.1295	24.1522	24.6374	25.3777	24.6066	24.8962	24.6064	24.8769	24.0141	24.1573	23.9606	23.8428	23.6909
Q9WTP7	GTP:AMP phosphotransferase AK3, mitochondrial	Ak3	0.640755	3.31307	0.000486324	+	0.00336552	+	21.4035	20.9144	21.3412	21.3609	21.0147	20.3629	20.6567	20.6026	20.5785	20.6301	3	3	3	22.9	22.9	22.9	25.426	0	6.7035	61182000	12	21.4559	21.1118	21.6427	21.2571	21.182	20.304	21.0921	21.5583	21.3732	21.3379	21.453	21.2917	21.6339	21.1009	20.3092	20.3456	20.6802	20.0628	20.3838	20.9036
P05064;A6ZI44;Q9CPQ9;A6ZI46;D3YWI1	Fructose-bisphosphate aldolase A;Fructose-bisphosphate aldolase	Aldoa;Aldoart1	-0.422396	4.18335	6.55611e-05	+	0.00513402	+	28.8746	28.9172	28.9099	28.7004	28.9172	29.4159	29.3183	29.2328	29.2575	29.2068	23	23	19	84.1	84.1	74.5	39.355	0	323.31	17635000000	357	28.8399	28.8474	28.9365	28.8952	28.9665	28.89	28.9286	28.7502	29.051	28.6328	28.7802	28.6882	28.8616	29.0273	28.8627	29.4512	29.5241	29.2724	29.3787	29.2566
P05063	Fructose-bisphosphate aldolase C	Aldoc	-0.370915	2.83747	0.00145388	+	0.0158449	+	22.6936	22.6954	22.6311	22.7906	22.8089	23.3524	23.059	23.0924	22.9201	23.0503	10	6	6	41	24.5	24.5	39.394	0	7.8524	254720000	43	22.6135	22.6779	22.7894	22.7762	22.3958	22.9144	22.3928	22.8944	22.606	22.7761	22.6213	22.9744	22.8397	22.8218	22.7652	23.3077	23.5679	23.1817	23.022	23.0987
O08583-2;O08583;Q9JJW6-2	THO complex subunit 4;Aly/REF export factor 2	Alyref;Alyref2	-0.404538	1.52964	0.0295368	+	0.0451818	+	20.9519	21.4524	20.9855	21.6089	21.5054	21.8161	21.8559	21.7398	21.619	21.4961	3	3	3	24.5	24.5	24.5	17.682	0	7.1843	93012000	38	20.8038	20.8239	21.2281	21.281	21.4159	21.6603	21.3894	20.6912	20.8761	21.6671	21.3414	21.8182	21.6766	20.9596	21.8801	21.7054	21.9071	21.8359	22.5082	21.6643
D3Z7U0;P97384	Annexin;Annexin A11	Anxa11	0.337955	2.36446	0.0043206	+	0.0281096	+	23.0588	22.9074	22.7248	22.8422	23.0089	22.4398	22.7982	22.5563	22.5742	22.4839	5	5	5	15.9	15.9	15.9	47.605	0	5.9809	215900000	25	23.158	22.9406	23.0779	22.8355	22.6265	23.2603	22.817	22.6416	22.7158	22.8774	22.9964	22.6529	22.8633	23.0607	23.1026	22.0132	22.3222	22.984	22.8207	22.8837
F8WIT2	Annexin	Anxa6	0.3727	6.6364	2.30995e-07	+	0.00335766	+	27.8975	27.8823	27.7908	27.8246	27.8097	27.4843	27.4467	27.4515	27.5006	27.4582	29	29	1	54.7	54.7	5.2	75.288	0	323.31	6577700000	238	27.8731	27.8661	27.9533	27.8323	27.9902	27.8244	27.7023	27.8443	27.8257	27.7905	27.7595	27.9238	27.8658	27.8104	27.7528	27.411	27.5186	27.5234	27.5237	27.3457
Q9D7N9	Adipocyte plasma membrane-associated protein	Apmap	0.415259	3.22994	0.000588929	+	0.00999273	+	19.6006	19.6287	19.5767	19.4826	19.3828	19.1897	19.1253	19.1083	18.9031	19.2687	2	2	2	5.5	5.5	5.5	46.434	0.0014327	1.9808	20197000	4	19.4878	19.8336	19.4804	19.7456	19.5867	19.5539	19.554	19.6044	19.5715	19.352	19.5301	19.5658	19.1589	19.5932	19.3962	19.2092	19.0024	19.3574	18.9726	19.0355
P08030	Adenine phosphoribosyltransferase	Aprt	-0.547406	3.82862	0.000148383	+	0.00333333	+	22.4387	22.6105	22.4614	22.1725	22.4781	23.1197	23.0003	22.9581	22.9129	22.9074	5	5	5	37.2	37.2	37.2	19.724	0	34.586	219300000	35	22.7474	22.3569	22.2119	22.5452	22.7461	22.5402	22.4193	22.4093	22.5556	22.115	22.2895	22.1131	22.2899	22.5724	22.5721	23.1805	23.1576	23.021	23.0019	22.9977
F8WIB1;P61211;E9Q006	ADP-ribosylation factor-like protein 1	Arl1	-0.288554	2.08446	0.00823264	+	0.0472342	+	19.7349	19.5218	19.7942	19.926	19.6973	19.9653	19.9215	19.9627	20.0693	20.1981	2	2	2	18.1	18.1	18.1	15.65	0.0027913	1.8594	25848000	5	19.1685	NaN	20.3014	19.8594	19.6702	19.0357	19.7636	NaN	19.8248	20.0193	20.1639	19.5948	19.6898	19.7005	19.7016	19.7958	20.2474	19.8526	20.4174	20.0922
H7BWZ3;Q9JM76;A0A0G2JFK7;D3Z2F7;D3Z2F8	Actin-related protein 2/3 complex subunit 3	Arpc3	0.45836	2.8346	0.00146351	+	0.0107279	+	24.6174	24.4154	24.1967	24.4449	24.6108	23.8749	24.1664	23.8613	24.0707	24.0202	2	2	2	14.1	14.1	14.1	19.637	0	164.82	638290000	31	24.4588	24.8	24.5933	24.2598	24.5768	24.4097	24.1392	24.2691	24.1818	24.3177	24.4849	24.5321	24.5203	24.5546	24.7576	24.0681	23.8275	23.729	23.8083	24.3189
Q9CPW4;Q3UA72	Actin-related protein 2/3 complex subunit 5	Arpc5	0.489754	3.33878	0.000458374	+	0.00578846	+	24.4422	24.6726	24.5161	24.276	24.428	24.1749	23.9158	23.8932	23.8689	24.0334	4	4	4	35.8	35.8	35.8	16.288	0	39.622	592020000	31	24.527	24.4608	24.3389	24.632	24.6043	24.7814	24.733	24.372	24.4432	24.1855	24.2678	24.3748	24.2742	24.5744	24.4354	24.2266	24.2961	24.0018	24.1551	23.7253
Q61024	Asparagine synthetase [glutamine-hydrolyzing]	Asns	-1.37109	5.79103	1.61798e-06	+	0	+	21.8661	22.1375	21.742	22.1106	21.9451	23.5534	23.4548	23.0813	23.2741	23.2932	9	9	9	23	23	23	64.282	0	9.7823	220050000	33	21.8756	21.6784	22.0444	22.2489	22.1547	22.009	21.7998	21.8843	21.5419	22.1944	22.203	21.9344	22.0423	21.7071	22.0858	23.6459	23.6311	23.3831	23.3733	23.6132
Q8VDN2	Sodium/potassium-transporting ATPase subunit alpha-1	Atp1a1	0.458305	4.10133	7.91904e-05	+	0.00388439	+	25.6463	25.9007	25.712	25.5938	25.6427	25.3253	25.1607	25.1789	25.2512	25.2878	26	26	26	32.9	32.9	32.9	112.98	0	129.55	1446900000	205	25.5383	25.648	25.7527	25.9128	25.8703	25.9188	25.6852	25.7719	25.6791	25.552	25.5222	25.7073	25.4973	25.7118	25.719	25.2775	25.4819	25.2166	25.2176	25.0963
P97370	Sodium/potassium-transporting ATPase subunit beta-3	Atp1b3	1.0163	2.49836	0.00317425	+	0.00352941	+	21.6148	21.1368	21.0704	21.3831	20.8715	19.5548	19.905	20.321	20.5286	20.6857	4	4	4	20.1	20.1	20.1	31.775	0	5.0333	51121000	12	NaN	21.1817	22.048	21.138	21.309	20.9634	21.2093	21.0093	20.9927	21.0347	20.786	22.3287	21.0457	20.7289	20.8398	18.8166	20.2931	NaN	20.3485	20.4907
Q6Q477-2;F7AAP4;E9Q828;Q6Q477;Q8C048;A2ALL9;Q0VF55	Calcium-transporting ATPase	Atp2b4;Atp2b3	0.53704	1.8902	0.0128766	+	0.0186392	+	20.5456	20.112	21.0588	20.4522	20.3397	19.7943	19.9433	19.879	20.1079	20.0986	3	3	1	4.5	4.5	1.4	122.29	0	4.7746	32903000	16	20.5455	20.279	20.8124	20.3169	20.2295	19.7895	NaN	21.4773	20.6403	20.4786	20.3239	20.554	NaN	20.7985	19.8808	19.7717	19.3708	20.2403	19.9758	19.6541
Q03265;D3Z6F5	ATP synthase subunit alpha, mitochondrial;ATP synthase subunit alpha	Atp5a1	0.377826	3.48398	0.000328107	+	0.0111359	+	27.0486	27.2059	27.1458	27.0276	26.8637	26.7141	26.611	26.6704	26.6576	26.7493	17	17	17	38.2	38.2	38.2	59.752	0	323.31	3909900000	205	26.9534	27.0328	27.1597	27.189	27.2493	27.1794	27.1022	27.1221	27.2132	27.0717	27.0168	26.9942	26.9044	26.8394	26.8473	26.6701	26.8404	26.6317	26.4645	26.548
P56480	ATP synthase subunit beta, mitochondrial	Atp5b	0.508212	4.85605	1.393e-05	+	0.00189691	+	28.057	28.1796	28.2563	28.1863	28.1169	27.4863	27.6551	27.6968	27.6948	27.722	22	22	22	68.4	68.4	68.4	56.3	0	323.31	8392500000	396	27.9897	28.0903	28.0911	28.2047	28.2584	28.0757	28.2266	28.3269	28.2155	28.1541	28.2046	28.2001	28.0981	28.1713	28.0812	27.5629	27.5685	27.3274	27.6854	27.6947
Q9D3D9;D3Z7S4	ATP synthase subunit delta, mitochondrial	Atp5d	0.530687	3.12627	0.000747703	+	0.00556098	+	23.2021	23.5721	23.3392	23.3334	23.2746	22.9747	22.5354	22.9098	22.7458	22.9023	2	2	2	29.2	29.2	29.2	17.6	0	32.014	266110000	14	23.1911	23.2577	23.1576	23.4614	23.5684	23.6865	23.1786	23.3148	23.5242	23.1036	23.3281	23.5684	23.0987	23.4214	23.3038	23.2013	22.8302	22.8924	22.8574	22.3759
B1ASE2;Q9DCX2	ATP synthase subunit d, mitochondrial	Atp5h	0.391106	1.84835	0.014179	+	0.0331441	+	23.3781	23.7621	23.799	23.7528	23.5774	22.9312	23.1687	23.3244	23.4607	23.4289	4	4	4	39.1	39.1	39.1	15.882	0	23.051	351450000	40	23.3468	23.4825	23.3051	23.7627	23.7996	23.7241	23.9158	23.6728	23.8083	23.5197	23.9046	23.834	23.5898	23.6113	23.5311	22.6221	23.1098	23.0616	23.1905	23.3061
P97450;E9QAD6	ATP synthase-coupling factor 6, mitochondrial	Atp5j	0.98791	2.32176	0.00476698	+	0.00415556	+	22.4763	22.7821	22.7757	22.7592	22.9475	21.8077	20.8739	21.7361	22.3128	22.0707	2	2	2	31.5	31.5	31.5	12.496	0.0040816	1.7485	117750000	9	NaN	22.7336	22.219	23.0296	22.8841	22.4327	22.9644	22.6237	22.7388	NaN	22.7592	NaN	22.8683	23.0267	NaN	21.3798	22.2357	NaN	21.6858	18.5748
Q61687;A0A0G2JF35	Transcriptional regulator ATRX	Atrx	0.351187	1.79738	0.0159448	+	0.0392554	+	19.1589	19.39	NaN	NaN	19.2982	19.0003	19.0188	NaN	18.977	18.7286	2	2	2	0.8	0.8	0.8	278.58	0.0047106	1.7223	8545700	2	19.0902	NaN	19.2276	19.3278	19.4452	19.3971	NaN	NaN	NaN	NaN	NaN	NaN	NaN	NaN	19.2982	18.9599	NaN	19.0407	19.2479	18.8357
P01887	Beta-2-microglobulin	B2m	0.459582	4.01829	9.58771e-05	+	0.00390698	+	23.4796	23.4451	NaN	23.4019	23.5631	23.0006	23.0215	23.0165	NaN	NaN	2	2	2	40.3	40.3	40.3	13.779	0	2.974	212940000	4	NaN	23.4796	NaN	23.4451	NaN	NaN	NaN	NaN	NaN	23.4154	23.3884	NaN	NaN	23.5631	NaN	23.5045	22.3634	23.1339	NaN	NaN
Q09200	Beta-1,4 N-acetylgalactosaminyltransferase 1	B4galnt1	0.807651	4.73042	1.86029e-05	+	0.000545455	+	22.92	22.889	22.7485	22.8021	22.8711	22.2101	21.9277	22.1497	21.7615	22.1435	6	6	6	16.7	16.7	16.7	59.211	0	14.687	180480000	40	22.7543	23.084	22.9217	23.03	22.7467	22.8904	22.788	22.9066	22.5509	22.6405	22.8764	22.8895	22.9752	22.5751	23.0631	22.9133	21.8562	21.8607	21.9731	21.9463
Q9D287	Pre-mRNA-splicing factor SPF27	Bcas2	0.364575	3.32513	0.000473006	+	0.0129241	+	21.4662	21.2598	21.3159	21.5025	21.4469	21.0141	21.0277	21.1323	21.1116	20.8827	3	3	3	22.7	22.7	22.7	26.131	0	10.235	73967000	17	21.2453	21.3568	21.7965	21.3867	21.126	21.2665	21.2088	21.4384	21.3005	21.346	21.4236	21.7379	21.4749	21.6253	21.2404	20.9327	21.2906	20.8189	20.9277	21.1278
D3Z2Y8;Q80XN0	D-beta-hydroxybutyrate dehydrogenase, mitochondrial	Bdh1	0.76944	2.34003	0.00457061	+	0.00648598	+	22.6772	21.9804	22.1109	22.4388	22.1711	21.446	21.1758	21.4481	22.0842	21.3772	6	6	6	28.3	28.3	28.3	29.146	0	6.186	125670000	22	22.7877	22.4373	22.8067	21.8662	22.0339	22.0412	21.9566	22.0255	22.3505	22.4273	22.6109	22.2781	22.3727	21.9941	22.1467	21.43	21.3423	21.5658	20.6875	21.7239
S4R1B8;S4R270;D3Z6Q9;S4R2J8;S4R171	Bridging integrator 2	Bin2	0.824891	2.77364	0.00168408	+	0.00349669	+	24.4012	23.8476	24.4575	23.7571	23.6865	23.2203	22.9745	23.1725	23.3669	23.2913	9	9	9	25.1	25.1	25.1	51.582	0	29.353	435100000	50	24.7358	24.55	23.9179	24.4153	24.056	23.0715	24.4493	25.0323	23.8908	23.7639	23.8132	23.6943	24.4325	24.7057	21.9214	23.3354	22.9845	23.3411	23.1588	22.5395
Q6PGF5		Bms1	-0.266192	2.75626	0.00175283	+	0.0369243	+	18.265	18.4537	18.3619	18.4501	18.2931	18.6911	18.7496	18.6397	18.512	18.5623	2	2	2	1.6	1.6	1.6	145.41	0.0059016	1.6402	8631600	3	NaN	18.265	NaN	18.4208	18.3258	18.6144	18.3338	NaN	18.3899	18.2727	NaN	18.6275	18.2172	18.3253	18.3369	18.3052	NaN	19.077	18.6229	18.8637
J3QP71;K3W4Q8;P18572-2;P18572	Basigin	Bsg	-0.463094	3.06136	0.000868245	+	0.00773333	+	22.3185	22.6762	22.4564	22.2852	22.5522	23.0817	22.9816	22.7993	22.9263	22.8151	4	4	4	30.5	30.5	30.5	21.602	0	5.3955	207630000	19	22.2502	22.425	22.2803	22.6897	22.6649	22.6741	22.3412	22.5426	22.4855	22.2717	22.1424	22.4416	22.6857	22.4925	22.4783	23.4011	22.9077	22.9364	23.0062	22.8564
Q9CXW3;A0A0A6YY29	Calcyclin-binding protein	Cacybp	-0.348621	2.3677	0.00428843	+	0.0257819	+	21.9549	22.0639	22.0221	22.0267	22.1093	22.6753	22.2568	22.3573	22.1883	22.4424	4	4	4	14	14	14	26.51	0	5.9895	151300000	19	22.0514	21.8308	21.9823	21.9377	22.0411	22.213	21.9421	22.0688	22.0552	21.8521	22.0419	22.186	22.1065	22.1469	22.0746	22.6118	22.6591	22.7548	22.2619	22.1784
E9QAI5;B2RQC6;G3UWN2;B2RQC6-2	CAD protein;Glutamine-dependent carbamoyl-phosphate synthase;Aspartate carbamoyltransferase;Dihydroorotase	Cad	-0.356324	4.49262	3.2165e-05	+	0.00718987	+	23.8152	23.8525	23.7146	23.7673	23.6754	24.1206	24.2281	24.1011	24.0886	24.0681	19	19	19	11.9	11.9	11.9	236.25	0	27.634	514760000	128	23.7104	23.9859	23.7492	23.8457	24.0686	23.6432	23.8478	23.5795	23.7165	23.7004	23.7937	23.8079	23.6986	23.5623	23.7652	24.1175	24.1856	24.0588	24.2324	24.3237
P0DP28;P0DP27;P0DP26;Q3UKW2;A0A3Q4EHJ0;Q9D6P8	Calmodulin-like protein 3	Calm1;Calml3	0.370248	2.60097	0.00250631	+	0.018602	+	27.6494	27.7707	27.3826	27.47	27.6771	27.3348	27.2377	27.2719	27.0514	27.2027	7	7	7	40.9	40.9	40.9	16.837	0	323.31	5714400000	135	27.5469	27.6926	27.7085	27.646	27.7976	27.8684	27.617	27.414	27.1166	27.355	27.397	27.658	27.5911	27.7772	27.6631	27.5034	27.2443	27.2567	27.194	27.3289
Q6XLQ8;O35887;G3UWV3;G3V004;G3UXA8;G3UWR0	Calumenin	Calu	0.565319	1.70485	0.0197309	+	0.022	+	22.3714	22.1998	22.0631	21.7525	22.3961	21.9537	21.7663	21.3726	21.763	21.1008	6	6	6	25.4	25.4	25.4	37.117	0	7.4229	123160000	26	22.0865	22.4038	22.624	22.042	22.3759	22.1816	21.9537	22.1013	22.1343	22.219	22.0902	20.9484	22.2701	22.3298	22.5883	22.0332	22.0142	21.8138	21.212	22.291
P35564	Calnexin	Canx	-0.909848	2.51442	0.00305898	+	0.00378182	+	21.1972	21.9847	21.3371	21.6625	21.2636	22.7157	22.3137	22.211	22.8052	21.9489	3	3	3	6.1	6.1	6.1	67.277	0	7.7594	141200000	33	21.3295	21.231	21.0309	22.1565	21.9817	21.816	21.5831	22.7066	19.7217	21.5614	21.7547	21.6713	21.4753	21.0007	21.315	22.3699	22.9541	22.823	22.6937	21.8469
P40124	Adenylyl cyclase-associated protein 1	Cap1	0.33796	3.1663	0.00068187	+	0.0162959	+	26.72	26.8685	26.7659	26.6998	26.6001	26.4339	26.4351	26.2735	26.3039	26.518	14	14	14	44.1	44.1	44.1	51.564	0	323.31	3339400000	151	26.6458	26.6722	26.8419	27.0141	26.9148	26.6765	26.8174	26.8592	26.6211	26.6169	26.7548	26.7277	26.6921	26.7634	26.3447	26.4683	26.2721	26.5613	26.4013	26.5234
Q99LB4;P24452	Macrophage-capping protein	Capg	-0.534489	2.15694	0.00696727	+	0.0139351	+	22.1413	22.601	22.3694	22.7795	22.3843	22.9861	22.7985	22.8327	22.965	23.3656	6	6	6	22.9	22.9	22.9	38.768	0	9.7977	213340000	48	22.1923	22.2786	21.953	22.6511	22.6543	22.4976	22.6333	22.1867	22.2881	22.6306	23.0554	22.6525	22.4216	22.3555	22.3758	22.6982	23.3126	22.9474	22.4885	23.058
O35350	Calpain-1 catalytic subunit	Capn1	0.484779	2.04472	0.00902159	+	0.0184249	+	22.0839	21.7296	22.2492	22.2991	22.038	21.5027	21.9798	21.5447	21.5492	21.3994	8	8	8	11.8	11.8	11.8	82.105	0	10.308	122780000	32	22.1534	22.2202	21.8781	22.3627	21.2576	21.5684	22.605	22.2583	21.8842	22.2956	22.3523	22.2495	22.2832	21.9414	21.8894	21.9164	21.3401	21.2518	21.5021	22.111
O08529	Calpain-2 catalytic subunit	Capn2	-0.615412	2.22781	0.00591826	+	0.0110972	+	20.6244	20.5441	20.4031	20.5512	20.7537	21.2342	21.4287	20.5838	21.3968	21.31	3	3	3	4.4	4.4	4.4	79.871	0	2.752	59861000	10	20.5157	20.6662	20.6912	20.2625	20.7915	20.5785	20.3627	20.6525	20.1941	20.3347	20.5055	20.8132	20.5653	20.9989	20.6969	21.027	21.5491	21.1264	21.7427	21.423
A0A087WQT6;O89110	Caspase-8;Caspase-8 subunit p18;Caspase-8 subunit p10	Casp8	-0.620506	1.37587	0.0420854	+	0.0329342	+	22.2459	20.9083	21.7681	21.9462	22.1406	22.2644	22.369	22.7233	22.1985	22.5564	7	7	7	18.2	18.2	18.2	57.82	0	12.597	146890000	47	22.0882	22.3956	22.254	21.902	21.8183	19.0046	21.4976	21.8713	21.9355	22.0744	21.9667	21.7975	21.8415	22.2088	22.3714	22.1957	22.3095	22.2879	22.4436	22.4532
P48758;A0A1B0GRG8	Carbonyl reductase [NADPH] 1	Cbr1	0.337225	2.18553	0.0065234	+	0.0318887	+	19.9047	20.0568	20.0298	20.1078	20.386	19.5881	19.7396	19.7873	19.8352	19.8488	2	2	2	8.3	8.3	8.3	30.641	0	2.36	27430000	20	20.0653	19.9969	19.6521	NaN	NaN	20.0568	20.4171	19.9292	19.743	NaN	20.3479	19.8677	20.4714	19.9837	20.7029	19.779	19.7206	19.2646	19.8868	19.4929
P83917;Q7TPM0;Q9CYJ8	Chromobox protein homolog 1	Cbx1	0.67678	1.68193	0.0208002	+	0.0181207	+	21.9712	21.4544	21.3865	21.6736	21.3066	20.6892	21.693	20.6579	20.6664	20.702	3	2	2	24.3	15.7	15.7	21.418	0	7.8014	76255000	16	21.9906	NaN	21.9518	21.569	21.153	21.6413	21.2085	21.4864	21.4648	21.7223	21.6516	21.6468	21.3813	21.2319	NaN	20.7083	20.427	20.9322	21.4992	21.763
Q9DCC5;P23198	Chromobox protein homolog 3	Cbx3	0.740917	4.18815	6.48404e-05	+	0.00104348	+	25.8267	25.7121	25.8509	26.1275	25.7938	25.1359	25.1828	25.2647	25.1597	24.8634	9	9	7	58.5	58.5	43.2	20.811	0	226.03	1518600000	64	25.9007	25.9115	25.6678	25.9868	25.5462	25.6032	25.8915	25.8326	25.8287	25.7667	26.4496	26.1663	25.7442	26.0241	25.613	25.354	24.9815	25.0721	25.1498	25.2317
Q61686	Chromobox protein homolog 5	Cbx5	0.43051	1.58078	0.0262552	+	0.0385323	+	23.95	24.0373	24.1148	24.0351	23.2959	23.2667	23.4461	23.5481	23.5321	23.4877	7	6	6	44	37.7	37.7	22.186	0	10.005	437900000	38	24.15	24.1219	23.5783	23.9796	23.7933	24.3391	23.6952	24.2722	24.3771	24.0337	24.0484	24.0233	21.1733	24.278	24.4363	23.4111	23.5763	22.8127	23.3062	23.4575
Q8CH18-3;Q8CH18	Cell division cycle and apoptosis regulator protein 1	Ccar1	1.27718	2.00743	0.00983033	+	0.00562814	+	20.0858	20.9633	20.1816	20.4996	20.4248	NaN	18.6247	19.7792	18.4305	19.781	2	2	2	2.8	2.8	2.8	124.74	0.0053333	1.6927	25124000	5	20.3276	20.153	19.7769	NaN	21.4428	20.4837	NaN	NaN	20.1816	20.573	19.9811	20.9449	21.5048	20.092	19.6775	NaN	NaN	NaN	17.3576	NaN
A0A0R4J0M8;Q8CDV6-2;Q8CDV6	Coiled-coil domain-containing protein 63	Ccdc63	-0.671514	2.52328	0.00299723	+	0.00646296	+	23.2902	23.0565	23.4184	22.9181	22.9495	23.7181	23.8736	23.5454	24.2511	23.6021	2	2	2	5.5	5.5	5.5	68.036	0.0014265	1.9563	332590000	11	23.2265	23.611	23.0331	23.3309	22.7267	23.1118	23.5261	NaN	23.3108	22.6006	23.0131	23.1407	23.0981	22.8326	22.9178	23.1233	23.6969	24.3341	23.493	23.9733
P80318;E9Q133;Q3U0I3;F6Q609	T-complex protein 1 subunit gamma	Cct3	-0.419995	6.38124	4.15679e-07	+	0.00234343	+	25.902	25.9336	25.9403	25.8087	25.924	26.3601	26.3135	26.2748	26.3153	26.3449	22	22	22	47.5	47.5	47.5	60.629	0	55.63	2205500000	215	25.8287	25.9945	25.8829	25.8778	25.9379	25.985	25.8959	25.8636	26.0615	25.7572	25.8261	25.8428	25.8938	26.0304	25.8479	26.3689	26.355	26.3565	26.2111	26.3894
P80315;G5E839	T-complex protein 1 subunit delta	Cct4	-0.305919	3.20662	0.000621406	+	0.0203116	+	25.8959	25.8421	25.6661	25.7597	25.7659	26.182	26.0979	26.0306	25.9738	26.1748	23	23	23	52.9	52.9	52.9	58.066	0	310.81	1979900000	176	25.8937	25.8421	25.9517	25.7926	25.9146	25.8189	25.5725	25.7089	25.717	25.8683	25.6628	25.7479	25.8763	25.7085	25.7127	26.1037	26.2601	26.1823	26.005	26.134
P80317	T-complex protein 1 subunit zeta	Cct6a	-0.464404	3.65615	0.000220724	+	0.00547475	+	25.7617	25.7482	25.7598	25.752	25.6469	26.2737	26.0598	26.1355	26.0865	26.4352	18	18	18	45	45	45	58.004	0	323.31	1966600000	102	25.8134	25.7412	25.7305	25.7971	25.4738	25.9738	25.6704	25.7738	25.8351	25.6307	25.591	26.0345	25.6994	25.5889	25.6524	26.3767	26.2642	26.1802	26.0859	26.0918
P80313;A0A0N4SV00	T-complex protein 1 subunit eta	Cct7	-0.276897	3.1557	0.00069871	+	0.0277071	+	25.2285	25.1356	25.0389	25.1803	25.0547	25.5421	25.3914	25.3155	25.3842	25.3892	17	17	17	43.9	43.9	43.9	59.652	0	102.6	1249900000	129	25.1515	25.3973	25.1368	25.2324	24.8784	25.2959	25.1737	24.9452	24.9979	25.0605	25.0772	25.403	24.9546	25.1151	25.0944	25.551	25.7088	25.3666	25.3863	25.4232
P42932;H3BL49	T-complex protein 1 subunit theta	Cct8	-0.272538	2.43483	0.00367422	+	0.0415783	+	26.3729	26.5669	26.483	26.2648	26.3943	26.8569	26.6244	26.6913	26.6404	26.6316	24	24	24	53.5	53.5	53.5	59.555	0	323.31	3084700000	200	26.3198	26.3929	26.406	26.5931	26.6357	26.472	26.6	26.4269	26.4219	26.232	26.2079	26.3545	26.4165	26.3918	26.3745	26.8894	26.8753	26.806	26.6926	26.5931
Q8K4E3;Q8K4F0	CD226 antigen	Cd226	1.77053	5.7356	1.83822e-06	+	0	+	20.877	20.3414	20.5183	21.1017	20.6836	18.7792	18.8943	19.0532	18.8684	19.0742	2	2	2	13.2	13.2	13.2	25.04	0	3.0331	35032000	13	21.1667	20.586	20.8782	20.2876	20.4209	20.3156	19.9294	20.9719	20.6536	21.0888	21.2759	20.9404	20.1052	20.379	21.5666	18.7808	NaN	18.7776	18.9559	18.7764
P24161;Q3UU54;A2MZG6;J3QMU3;P24161-2	T-cell surface glycoprotein CD3 zeta chain	Cd247	0.989977	4.10374	7.8751e-05	+	0.000533333	+	22.1731	22.6588	22.6286	21.9901	22.3552	21.4819	21.2529	21.3403	21.3987	21.3823	4	4	4	32.3	32.3	32.3	18.637	0	4.0404	121040000	14	22.0951	22.2942	22.1301	22.6177	22.8196	22.5393	23.0756	22.6055	22.2047	22.0856	21.5109	22.3737	22.4428	22.3523	22.2706	21.9558	21.0693	21.4205	21.3219	21.266
P31041	T-cell-specific surface glycoprotein CD28	Cd28	0.951172	2.59472	0.00254259	+	0.00340136	+	20.2946	19.583	19.3664	19.4316	NaN	18.4965	18.7164	18.6488	18.7453	18.9816	2	2	2	11.5	11.5	11.5	25.243	0	2.6132	15266000	3	20.6496	19.4609	20.7733	19.617	19.4144	19.7176	21.055	NaN	17.6778	NaN	19.4304	19.4327	NaN	NaN	NaN	NaN	17.919	19.074	NaN	18.8935
P11942;E0CXP3	T-cell surface glycoprotein CD3 gamma chain	Cd3g	0.808001	3.32225	0.000476162	+	0.00182979	+	22.9994	22.5348	23.1156	23.0143	23.2376	21.9528	22.1714	22.3332	22.3559	22.0484	3	3	3	26.4	26.4	26.4	20.234	0	41.83	199480000	18	22.9699	22.8434	23.185	23.0941	22.2742	22.236	23.0098	23.3465	22.9906	23.2272	23.3047	22.5112	23.2568	23.4187	23.0372	22.0175	21.9692	21.8718	22.1608	21.9604
A0A2R8VI30;A0A2R8VK70;A0A2R8W6P0;Q61735;Q61735-2;A0A2R8VJU9;D3Z187;A0A2R8VI94	Leukocyte surface antigen CD47	Cd47	0.483368	2.24592	0.0056765	+	0.0151348	+	24.6388	24.7583	24.6706	24.3438	24.5488	24.1165	23.8835	24.2219	23.8735	24.4479	3	3	3	13.9	13.9	13.9	29.344	0	136.5	703960000	34	24.4666	25.1139	24.3359	24.7194	24.753	24.8024	24.7592	24.7178	24.5347	24.2426	24.4242	24.3645	24.6365	24.2927	24.7173	24.1286	24.1974	24.0236	23.5009	24.098
P18181	CD48 antigen	Cd48	1.08077	2.88998	0.00128832	+	0.00186957	+	22.2398	21.6183	22.4366	22.5264	22.4214	21.4528	21.5801	21.0927	20.7981	20.9149	4	4	4	22.5	22.5	22.5	27.383	0	9.3761	118010000	37	22.5857	NaN	21.894	23.0368	21.864	19.954	22.3562	22.3619	22.5918	22.8463	22.4102	22.3227	22.532	22.3825	22.3497	21.5679	21.5195	21.2712	21.4753	21.6549
P13379	T-cell surface glycoprotein CD5	Cd5	0.710927	2.19373	0.00640127	+	0.00792366	+	20.0645	20.4691	19.9504	20.1405	20.2683	19.4122	NaN	19.3345	19.1517	19.9721	2	2	2	5.7	5.7	5.7	53.849	0	2.228	19942000	9	19.9117	20.2834	19.9985	NaN	20.4395	20.4987	19.8311	20.0696	NaN	20.2186	19.7265	20.4765	20.2683	NaN	NaN	19.6529	19.3621	19.2216	NaN	NaN
P10300	T-cell surface glycoprotein CD8 beta chain	Cd8b	1.2121	2.4853	0.00327118	+	0.00295935	+	23.2474	22.8796	23.0635	23.0354	22.7754	21.4254	22.6752	21.2969	22.2332	21.3102	3	3	3	13.1	13.1	13.1	24.287	0	3.6216	188150000	21	23.1161	23.0065	23.6196	22.8598	23.0706	22.7085	23.173	23.123	22.8945	23.1748	23.3214	22.6101	22.8292	22.9591	22.5379	21.3217	21.1682	21.7862	22.1719	22.8464
P11440;D3Z2T9	Cyclin-dependent kinase 1	Cdk1	-0.262968	2.90839	0.00123483	+	0.0354108	+	23.7884	23.9496	23.8249	23.7102	23.7087	23.9806	24.1325	23.9925	24.0878	24.1033	9	9	8	37.4	37.4	34.7	34.106	0	15.251	492820000	62	23.8168	23.8085	23.74	23.9759	24.0002	23.8729	23.9705	23.7743	23.7299	23.8361	23.7527	23.5418	23.8118	23.5683	23.7461	24.2649	23.3586	24.3183	24.2863	24.1313
Q64261	Cyclin-dependent kinase 6	Cdk6	-0.546901	1.83705	0.0145529	+	0.0194734	+	22.6042	22.1173	23.0908	22.616	22.9401	23.3719	23.3133	23.0882	23.2	23.1295	5	4	4	19	16.6	16.6	37.028	0	8.2878	284780000	19	22.8689	22.4408	22.503	22.9228	23.1351	20.2939	22.86	23.4481	22.9643	21.7516	22.7041	23.3923	23.1772	23.5811	22.0619	23.2014	23.267	23.6474	23.418	23.3629
A0A3Q4L374;A0A3Q4EH84;A0A3Q4L347;P60334	Cysteine dioxygenase type 1	Cdo1	-0.457386	2.1079	0.00780001	+	0.0188325	+	21.9077	22.4308	22.3301	22.4657	22.3245	22.9466	22.726	22.4511	22.7856	22.8365	1	1	1	7.3	7.3	7.3	11.136	0.0021067	1.8933	112630000	8	NaN	21.9077	NaN	22.4308	NaN	NaN	NaN	22.331	22.3293	22.4657	NaN	NaN	NaN	22.1059	22.5431	22.8571	23.0361	NaN	22.8066	22.6701
A0A087WNP6;Q4VAA2-2;Q4VAA2	Protein CDV3	Cdv3	-0.723185	2.03151	0.00930021	+	0.0110865	+	22.3661	22.8307	22.4473	22.6349	22.8081	23.2652	22.8898	23.4358	23.0993	24.013	3	3	3	19.6	19.6	19.6	24.196	0	3.6646	243130000	3	22.4515	21.6999	22.947	22.696	23.0214	22.7747	22.1979	22.6967	NaN	23.0424	21.8328	23.0296	23.1831	22.8414	22.4	23.3251	23.6988	22.7717	23.076	23.4185
P18760;F8WGL3	Cofilin-1	Cfl1	0.239002	3.28455	0.00051934	+	0.0380609	+	29.1661	29.3609	29.2478	29.1685	29.232	29.0766	28.9644	28.9369	28.9869	29.0154	12	12	12	68.1	68.1	68.1	18.559	0	323.31	18090000000	261	29.117	29.2155	29.1658	29.3391	29.3754	29.3682	29.2532	29.2149	29.2752	29.1075	29.1379	29.26	29.2427	29.196	29.2572	29.1093	29.0343	29.0861	29.0305	28.9415
Q9D9P1;D3Z0L4;Q9CRB9;S4R238	MICOS complex subunit Mic19	Chchd3	0.662402	1.54136	0.0287504	+	0.0231827	+	21.069	21.328	21.3012	21.7496	21.1528	21.4055	20.0779	20.7868	20.5687	20.4497	3	3	3	20	20	20	20.375	0	4.1181	69198000	8	21.0505	21.1203	21.0363	21.3197	21.2835	21.3808	21.5551	21.1795	21.1691	21.1892	21.6365	22.4229	21.2518	21.0995	21.1071	21.9264	21.1733	21.1168	19.4016	19.7955
Q8R2N2	Cirhin	Cirh1a	-0.737643	5.20203	6.28022e-06	+	0.00055814	+	19.8167	19.574	19.8285	19.7144	19.6829	20.4146	20.5914	20.3353	20.5837	20.3797	3	3	3	4.5	4.5	4.5	76.908	0	2.8619	30377000	9	19.9869	19.6464	NaN	NaN	19.5096	19.6385	19.9187	19.7445	19.8225	NaN	NaN	19.7144	19.6678	19.6981	NaN	20.2179	20.8549	20.1711	20.5863	20.8056
Q04447	Creatine kinase B-type	Ckb	-0.773896	4.10195	7.90764e-05	+	0.00107463	+	20.7398	20.6273	20.6398	20.6092	20.5798	21.0896	21.7139	21.337	21.4463	21.4785	3	3	3	8.9	8.9	8.9	42.713	0	2.7126	66708000	9	20.8145	20.7441	20.6607	20.6348	20.6077	20.6394	20.45	20.6566	20.8129	20.9034	20.4358	20.4883	20.6997	20.5873	20.4525	21.2368	20.946	21.0858	21.9913	21.6048
Q91V08	C-type lectin domain family 2 member D	Clec2d	1.48155	3.54439	0.000285503	+	0.000571429	+	21.4823	20.4066	20.7824	21.2559	20.5175	19.4189	19.551	19.327	19.7416	18.9984	2	2	2	13	13	13	23.647	0	2.8711	46369000	5	22.198	20.4984	21.7506	20.8347	19.3989	20.9863	20.7809	20.7146	20.8515	20.7341	20.7071	22.3265	20.7691	21.442	19.3414	19.5147	19.2502	19.4919	19.6838	19.4647
A0A0R4J093;Q9DBP5	UMP-CMP kinase	Cmpk1	0.752653	2.16939	0.00677026	+	0.00773228	+	22.4977	21.9233	21.8749	21.6892	21.7768	20.9788	21.1855	21.6764	21.3568	20.8013	5	5	5	27.3	27.3	27.3	25.714	0	7.245	107340000	28	22.3651	22.0393	23.0887	21.0823	21.9429	22.7447	21.8621	21.8792	21.8835	21.849	21.5642	21.6546	21.9378	21.5124	21.8803	21.7999	21.9155	19.2208	22.2091	20.371
P53996-2;P53996-3;P53996;A0A0N4SVS6	Cellular nucleic acid-binding protein	Cnbp	-0.691251	2.13856	0.00726843	+	0.0102158	+	21.0165	20.9873	21.4053	21.7976	20.819	22.0282	21.6265	21.8065	22.0357	21.9852	3	3	3	21.2	21.2	21.2	18.742	0	11.385	104900000	14	20.7626	21.2805	21.0063	20.9052	20.9656	21.091	21.078	21.4374	21.7005	21.4538	22.5245	21.4147	20.9557	20.4635	21.0379	22.1612	22.1752	21.7481	21.1965	21.8485
Q9D1A2	Cytosolic non-specific dipeptidase	Cndp2	-0.431352	3.58592	0.000259464	+	0.00685202	+	24.6257	24.5089	24.3361	24.2791	24.3525	24.9525	24.8107	24.7941	24.8498	24.8518	16	16	16	45.1	45.1	45.1	52.767	0	182.81	793540000	97	24.4164	24.8423	24.6183	24.4945	24.557	24.4753	24.2992	24.327	24.382	24.152	24.2089	24.4765	24.3115	24.4014	24.3446	25.0919	25.015	24.7507	24.8374	24.7724
Q08093;D3Z7R6	Calponin-2;Calponin	Cnn2	0.398484	2.72712	0.00187449	+	0.0148276	+	23.8598	23.4776	23.6295	23.5021	23.7044	23.1704	23.2208	23.1123	23.2531	23.4243	7	7	7	30.8	30.8	30.8	33.155	0	323.31	378860000	61	23.7331	23.8956	23.9506	23.5165	23.4269	23.4895	23.7062	23.6891	23.4931	22.6202	23.8487	24.0373	23.5961	23.8074	23.7098	23.5815	23.0297	22.9001	23.3467	23.1793
A0A1W2P729;Q9QXT0	Protein canopy homolog 2	Cnpy2	0.457134	1.85171	0.01407	+	0.0255399	+	21.4501	21.5804	21.5903	21.1804	21.6011	20.553	21.0917	21.0467	21.1841	21.2411	3	3	3	26.5	26.5	26.5	15.316	0	6.9121	73215000	27	21.1123	21.7878	NaN	21.4068	21.595	21.7395	21.4602	21.7204	NaN	21.0931	20.9532	21.4949	21.5503	21.6013	21.6518	18.9863	21.2883	21.3843	21.4337	21.0385
Q8CIE6;F8WHL2	Coatomer subunit alpha;Xenin;Proxenin;Coatomer subunit alpha	Copa	-0.384038	1.52901	0.0295793	+	0.0490111	+	22.4604	22.3671	22.1939	22.1963	22.5584	23.0407	22.8081	22.38	22.9504	22.5172	8	8	8	7	7	7	138.43	0	8.1978	213740000	37	22.2667	22.4735	22.6411	22.6769	22.525	21.8994	22.579	21.9737	22.029	21.8918	22.0655	22.6318	22.3897	22.6731	22.6123	22.7932	23.1501	23.1788	22.8028	22.9267
O89053;G3UYK8	Coronin-1A;Coronin	Coro1a	0.448954	3.09821	0.000797616	+	0.0082406	+	27.7483	28.0646	28.051	28.026	27.9863	27.7196	27.327	27.5046	27.5698	27.5104	22	22	22	54.4	54.4	54.4	50.989	0	323.31	7242000000	176	27.8264	27.8948	27.5235	27.8823	28.1647	28.1466	27.9978	28.0717	28.0835	27.862	28.0553	28.1607	27.8718	28.1053	27.9817	27.7434	27.5619	27.8534	27.3124	27.2892
Q9WUM4	Coronin-1C	Coro1c	-0.525702	1.78116	0.0165518	+	0.0220538	+	20.3533	21.1246	20.7541	20.9677	20.7593	21.5131	21.6743	21.1489	21.1558	21.0955	5	5	5	11.6	11.6	11.6	53.12	0	5.2213	61220000	9	20.9511	20.9408	19.1681	21.1747	21.1622	21.037	NaN	20.5394	20.9688	20.8494	20.9691	21.0845	20.5231	NaN	20.9956	21.2289	21.867	21.4434	21.8753	NaN
Q9CQI6	Coactosin-like protein	Cotl1	0.824273	3.09753	0.000798867	+	0.00232727	+	24.3034	24.2008	24.1274	24.2535	24.0351	22.9294	23.7426	23.4041	23.6059	23.117	4	4	4	26.1	26.1	26.1	15.944	0	6.2931	466100000	24	24.4881	23.92	24.5022	24.4352	24.3792	23.7881	24.1835	24.0378	24.1611	23.7852	24.5215	24.454	24.1752	23.6147	24.3153	23.597	21.7085	23.4827	23.2693	23.8969
P12787	Cytochrome c oxidase subunit 5A, mitochondrial	Cox5a	0.504625	3.1256	0.000748862	+	0.00653211	+	23.09	23.4786	23.2897	23.5842	23.2456	22.6946	22.814	22.8491	22.8898	22.9175	4	4	4	37.7	37.7	37.7	16.101	0	90.108	324440000	20	23.0701	23.047	23.153	23.4972	23.625	23.3135	23.4924	23.2398	23.137	23.1715	24.3248	23.2564	23.0981	23.2738	23.3649	22.7599	22.6939	22.6301	22.8562	22.7428
Q9D881;P19536	Cytochrome c oxidase subunit 5B, mitochondrial	Cox5b	0.82473	4.77512	1.67833e-05	+	0.000585366	+	22.4498	22.8842	22.8634	22.766	22.5685	21.8945	21.796	21.9707	21.9137	21.8333	4	4	4	40.3	40.3	40.3	13.847	0	5.7264	162500000	26	22.3843	22.6074	22.3577	22.9383	22.8135	22.9008	22.8545	23.0156	22.7202	22.7606	22.7026	22.8346	22.4771	22.5825	22.6457	21.7506	21.9661	21.9668	22.0986	21.6987
A0A140LIU3;P56391	Cytochrome c oxidase subunit 6B1	Cox6b1	1.22802	1.952	0.0111688	+	0.00645283	+	22.5056	20.8801	21.5508	22.1907	22.128	19.8596	20.5113	20.4894	21.2416	21.0133	2	2	2	55.8	55.8	55.8	4.8655	0	2.2367	65402000	7	NaN	22.5056	NaN	21.3476	20.2362	21.0564	20.618	NaN	22.4837	21.0541	22.8138	22.7042	NaN	21.4901	22.7659	20.7901	18.9291	NaN	20.5113	NaN
H3BJ30;H3BJW3;Q6NVF9;H3BKW0	Cleavage and polyadenylation specificity factor subunit 6	Cpsf6	0.438206	3.30311	0.000497611	+	0.00761446	+	22.6002	22.9489	22.8042	22.9029	22.8843	22.3092	22.3861	22.3189	22.3626	22.5725	4	4	4	10	10	10	59.308	0	94.599	209080000	42	22.6849	22.4415	22.674	22.8499	23.062	22.9347	22.4716	23.0083	22.9327	22.965	22.8147	22.9291	22.6696	23.1977	22.7855	22.417	22.3964	22.1143	22.3394	22.4796
Q62347;Q01147-2;Q01147;D3Z7P7;D3Z326;F6VJ22;D3Z6A5;P27699-11;F6QWT6;F6U9F5;P27699-10;P27699-2;P27699-8;F6Q346;P27699-7;F6W4F5;E9PWV9;P27699-6;A0A087WRI6;D3Z7M6;F6QKL8;D3Z2U7;P27699-5;P81269	Cyclic AMP-responsive element-binding protein 1;Cyclic AMP-dependent transcription factor ATF-1	Creb1;Crem;Atf1	0.391175	2.84536	0.00142772	+	0.0141404	+	20.5437	20.6105	20.5941	20.4708	20.6361	19.9654	20.1475	20.1549	20.445	20.1865	2	2	2	9.8	9.8	9.8	30.959	0.0014337	1.9822	36622000	6	20.5109	20.503	20.617	20.5291	20.6286	20.6738	20.8114	NaN	20.3769	21.0625	19.7287	20.6213	20.7852	20.5625	20.5606	20.161	19.2725	20.4627	NaN	20.1803
Q9CZU6	Citrate synthase, mitochondrial	Cs	0.26363	3.41581	0.000383872	+	0.0282187	+	25.031	25.2633	25.0708	25.156	25.1492	24.8169	24.884	24.826	24.9084	24.9168	11	11	11	30.8	30.8	30.8	51.736	0	55.847	1029000000	89	25.0368	24.95	25.1061	25.14	25.3658	25.284	24.6912	25.1556	25.3655	25.1891	25.1084	25.1706	25.1428	25.0513	25.2534	24.8512	24.8699	24.7297	24.9449	24.7597
Q8JZN2;Q91W50;A0A0G2JF72	Cold shock domain-containing protein E1	Csde1	-0.449491	4.79604	1.59939e-05	+	0.00328571	+	22.4493	22.3499	22.286	22.3768	22.229	22.8687	22.7128	22.8262	22.7171	22.8135	8	8	8	14.2	14.2	14.2	85.652	0	10.087	191400000	50	22.5359	22.3814	22.4307	22.1098	22.4678	22.4722	22.5234	22.1701	22.1645	22.5158	22.264	22.3506	22.1624	22.183	22.3415	23.2414	22.6793	22.6854	22.7672	22.6792
P97315	Cysteine and glycine-rich protein 1	Csrp1	0.532296	2.90435	0.00124637	+	0.00682143	+	23.7759	23.8114	23.8285	23.5466	24.1246	23.1997	23.258	23.3811	23.4551	23.1314	6	6	6	46.6	46.6	46.6	20.583	0	16.436	384750000	38	23.8042	23.9943	23.5291	24.0968	23.2123	24.1252	24.06	23.6283	23.797	23.8713	24.0139	22.7545	24.3364	24.1328	23.9044	23.3109	22.716	23.5723	23.8552	22.7961
P70303-3;P70303-2;P70303	CTP synthase 2	Ctps2	1.00887	2.37397	0.00422698	+	0.00383529	+	20.0281	19.3621	19.3212	19.4857	18.5593	18.4564	18.5504	18.0223	18.4837	18.1993	3	2	2	8.1	5.4	5.4	57.465	0	2.3331	15572000	5	20.0006	19.3258	20.758	19.3573	19.1766	19.5525	19.2025	NaN	19.44	20.0948	19.2694	19.0929	19.9791	17.1394	NaN	18.5692	18.3905	18.4095	18.3297	18.5864
Q62018-3;Q62018;Q62018-2	RNA polymerase-associated protein CTR9 homolog	Ctr9	0.293301	3.70992	0.000195019	+	0.0180526	+	19.1989	19.1734	19.1347	19.215	19.1377	18.8286	19.045	18.8312	18.8687	18.8197	2	2	2	1.9	1.9	1.9	123.86	0.0014482	2.0296	12431000	6	19.0402	19.4922	19.0642	19.1709	19.008	19.3413	NaN	NaN	19.1347	NaN	19.0005	19.4294	19.1761	19.0534	19.1835	18.9477	18.7094	NaN	18.8782	19.0635
G3X8T3;P16675	Carboxypeptidase;Lysosomal protective protein;Lysosomal protective protein 32 kDa chain;Lysosomal protective protein 20 kDa chain	Ctsa	0.637939	2.1872	0.00649831	+	0.0110423	+	21.7675	21.0777	21.7332	21.7781	21.1403	20.8181	20.628	20.8438	21.0163	21.0009	4	4	4	13	13	13	55.726	0	3.9838	67233000	6	21.4978	21.466	22.3386	21.4748	21.7627	19.9956	21.3467	22.1197	NaN	22.2222	21.5524	21.5598	21.4722	NaN	20.8084	20.8746	NaN	20.7617	20.4186	NaN
P97821	Dipeptidyl peptidase 1;Dipeptidyl peptidase 1 exclusion domain chain;Dipeptidyl peptidase 1 heavy chain;Dipeptidyl peptidase 1 light chain	Ctsc	0.919565	4.92441	1.19012e-05	+	0.000347826	+	22.7945	23.0508	23.048	22.8004	22.9626	22.2075	21.7693	21.9445	21.99	22.1473	3	3	3	9.5	9.5	9.5	52.376	0	17.34	189910000	38	22.6511	22.64	23.0924	23.0727	23.0678	23.0121	23.061	23.1776	22.9055	22.7845	22.6719	22.9448	22.9034	23.0589	22.9255	22.303	22.2969	22.0225	21.8166	21.8431
F8WIR1;P18242;F6Y6L6	Cathepsin D	Ctsd	0.545887	3.51818	0.000303266	+	0.00380488	+	24.2104	24.1517	24.3109	24.1728	24.5667	23.8609	23.7282	23.83	23.6182	23.6457	7	7	7	22	22	22	44.215	0	18.572	561250000	53	24.094	24.305	24.2321	24.3225	24.0419	24.0906	24.832	24.1707	23.9299	24.4324	24.4675	23.6186	24.7334	24.5835	24.3832	23.9681	24.1771	23.4375	23.4111	24.05
Q9D172;A0A1W2P870;A0A1W2P7B6	ES1 protein homolog, mitochondrial	D10Jhu81e	0.750896	3.76674	0.000171102	+	0.00158025	+	22.0624	22.19	22.1411	21.6835	21.7205	21.1393	21.1844	21.2692	21.1248	21.3252	2	2	2	13.2	13.2	13.2	28.09	0.0014225	1.9432	100030000	3	21.6188	21.6077	22.9607	22.8472	21.8793	21.8434	22.8535	21.82	21.7498	21.562	21.6253	21.8632	21.797	21.6573	21.7073	20.9931	21.2219	21.2029	21.0725	21.1064
Q922B2	Aspartate--tRNA ligase, cytoplasmic	Dars	-0.424986	3.09367	0.000805992	+	0.0106192	+	24.2717	24.5305	24.5738	24.3536	24.4448	25.0454	24.6929	24.9127	24.7834	24.8649	17	17	17	43.9	43.9	43.9	57.147	0	32.105	787930000	90	24.251	24.3529	24.2111	24.6936	24.2715	24.6265	24.6545	24.5468	24.5201	24.2337	24.3802	24.4469	24.412	24.561	24.3615	24.9971	25.1876	24.9515	24.7927	24.6656
Q62418-3;Q62418-2;Q62418	Drebrin-like protein	Dbnl	0.313452	2.03297	0.00926884	+	0.0412505	+	23.3716	23.2196	23.0264	23.3183	22.9727	22.7562	22.8787	22.9915	22.9503	22.7645	7	7	7	23.1	23.1	23.1	48.341	0	9.5803	263170000	30	23.3074	23.3521	23.4553	23.1744	23.0593	23.4252	22.5577	23.2441	23.2774	23.1154	23.2946	23.5449	23.2074	22.916	22.7946	22.5576	23.0823	22.6288	22.9377	22.8478
O54734	Dolichyl-diphosphooligosaccharide--protein glycosyltransferase 48 kDa subunit	Ddost	-0.293111	2.13595	0.00731227	+	0.0441147	+	23.8406	23.6986	23.747	23.6386	23.4117	23.9716	23.8691	24.087	23.883	23.9914	7	7	7	21.3	21.3	21.3	49.027	0	13.065	449380000	73	23.7383	23.8998	23.8836	23.65	23.6581	23.7879	23.7866	23.8272	23.6272	23.7558	23.5981	23.5619	23.4255	23.4694	23.3403	23.9818	23.8654	24.0674	23.7971	23.8589
Q8K363	ATP-dependent RNA helicase DDX18	Ddx18	-0.61332	2.23623	0.00580452	+	0.0111298	+	19.357	20.1134	20.2329	20.0404	20.1016	20.6122	20.4221	20.5258	20.7322	20.6194	3	3	3	5.5	5.5	5.5	74.18	0	2.5737	35512000	5	19.3295	19.3845	NaN	20.1573	20.2566	19.9261	NaN	20.0204	20.4454	19.7028	NaN	20.3779	20.3054	19.9818	20.0175	20.4456	20.6541	20.7369	20.5667	20.5668
Q61655;Q8R3C7;Q8BZY3	ATP-dependent RNA helicase DDX19A	Ddx19a;Ddx19b	-0.723437	1.89286	0.0127981	+	0.012875	+	23.6201	23.4728	23.4901	23.3058	22.3905	24.1574	23.9218	23.9789	23.9069	23.9316	6	6	6	18.2	18.2	18.2	53.932	0	6.2449	392430000	32	23.732	23.8014	23.3268	23.5851	NaN	23.3605	23.5211	23.4837	23.4655	22.9761	23.8336	23.1077	23.4732	20.9866	22.7118	24.2005	23.9914	24.2804	23.947	24.2005
Q9JIK5	Nucleolar RNA helicase 2	Ddx21	-0.628044	2.42036	0.00379877	+	0.00774603	+	21.3891	21.5549	21.4956	21.1214	21.145	21.6996	22.1376	21.8947	22.3777	21.7366	7	7	7	10	10	10	93.55	0	7.5607	102450000	9	21.4484	21.2382	21.4807	21.2607	21.5471	21.857	21.5496	21.1959	21.7414	21.0828	20.8588	21.4226	21.3096	21.209	20.9164	21.9182	21.5376	21.6431	21.7811	22.3814
Q62167;P16381	ATP-dependent RNA helicase DDX3X;Putative ATP-dependent RNA helicase Pl10	Ddx3x;D1Pas1	-0.439527	2.19296	0.00641267	+	0.0186189	+	23.8281	23.9501	23.7776	23.5073	23.6618	24.3244	24.0796	23.8628	24.3322	24.3235	9	9	1	18.1	18.1	1.8	73.101	0	15.811	519320000	63	23.7344	23.8665	23.8833	24.0039	23.7977	24.0487	23.7325	23.6949	23.9053	23.7002	23.7065	23.1152	23.5425	23.6694	23.7735	24.2428	24.4617	24.2686	24.0994	24.0136
Q8BTS0;Q61656;S4R1I6	Probable ATP-dependent RNA helicase DDX5	Ddx5	-0.694499	4.92484	1.18894e-05	+	0.000571429	+	25.1659	25.2049	25.1355	25.4173	25.2296	26.0945	25.8734	25.9888	25.7845	25.8843	18	18	15	33.2	33.2	28.1	69.265	0	132.93	1555800000	128	25.1696	25.1377	25.1903	25.3853	25.3632	24.8663	25.1023	25.2124	25.0917	25.661	25.4091	25.1817	25.1253	25.1723	25.3911	26.2916	26.1177	25.8743	25.8485	25.8047
Q9CQ62	2,4-dienoyl-CoA reductase, mitochondrial	Decr1	0.616735	2.05617	0.00878688	+	0.0128833	+	20.7006	20.3313	19.9686	20.7166	20.5068	19.7178	19.7615	19.7706	NaN	20.0623	2	2	2	6.9	6.9	6.9	36.213	0	2.274	27401000	7	20.8595	20.4765	20.7656	20.3313	NaN	NaN	21.0811	17.8726	20.9521	NaN	21.1564	20.2769	20.5656	20.448	NaN	19.706	19.91	19.5374	20.1057	19.6585
Q7TNV0;E9Q8Y1;D3YVJ6	Protein DEK	Dek	0.614911	3.7422	0.000181051	+	0.00240708	+	23.9534	23.9014	23.9346	23.7474	23.9159	23.0856	23.4258	23.4072	23.0432	23.4164	6	6	6	20.8	20.8	20.8	43.158	0	7.6293	404340000	54	23.9785	23.718	24.1638	24.1512	24.0149	23.5382	23.7187	24.1092	23.976	23.8027	23.8282	23.6111	23.8799	24.0079	23.86	22.3481	23.5536	23.3551	23.2516	23.5506
Q99L04	Dehydrogenase/reductase SDR family member 1	Dhrs1	0.588643	2.18308	0.00656029	+	0.0121699	+	19.9609	19.388	19.3081	19.1287	19.2255	18.8483	18.9403	18.5746	18.946	18.7588	1	1	1	5.4	5.4	5.4	34.005	0.0027759	1.8371	14552000	12	19.4921	19.8133	20.5773	19.2646	19.5113	NaN	18.9899	19.2869	19.6476	NaN	19.1287	NaN	18.8923	19.3348	19.4495	18.6424	19.4214	18.4811	NaN	18.8691
O35286;Q497W9;A0A0G2JG10	Pre-mRNA-splicing factor ATP-dependent RNA helicase DHX15	Dhx15	-0.275591	2.19881	0.00632689	+	0.0478961	+	23.3167	23.1061	23.1637	23.3303	23.0546	23.6164	23.4503	23.3076	23.4531	23.5221	10	10	9	15.5	15.5	14.3	91.006	0	13.209	319090000	66	23.2547	23.2213	23.4741	23.1471	23.1256	23.0457	23.0946	23.2436	23.153	23.3549	23.3441	23.2921	23.2378	23.1961	22.7301	23.799	23.567	23.4833	23.5185	23.3774
Q9D2G2;Q9D2G2-2	Dihydrolipoyllysine-residue succinyltransferase component of 2-oxoglutarate dehydrogenase complex, mitochondrial	Dlst	0.51834	1.50363	0.0313594	+	0.033173	+	20.7202	20.8917	21.2947	20.9067	20.8713	20.3196	20.1007	20.3025	20.2709	21.0992	3	3	3	11.7	11.7	11.7	48.994	0	4.8302	37861000	17	NaN	NaN	20.7202	20.9356	20.8478	NaN	21.6039	21.014	21.2663	NaN	20.9446	20.8688	21.5114	20.4674	20.6351	19.7231	20.7035	20.532	20.3838	NaN
G3UZZ3;Q3T9X3;F8WIV5;P39054-2;P39054;Q3TCR7;G3X9G4	Dynamin-2	Dnm2	0.421738	1.92258	0.0119515	+	0.0271244	+	22.5802	22.2442	22.0893	22.2986	22.3163	21.8846	22.1931	21.5412	21.903	21.898	6	6	3	10	10	4.5	91.56	0	9.472	136600000	36	22.4646	22.6773	22.5986	22.1972	22.0606	22.4749	22.0683	22.0193	22.1805	22.3898	22.3976	22.1084	22.2277	22.3883	22.3328	21.8287	21.921	21.9042	21.7124	22.6888
Q8C147	Dedicator of cytokinesis protein 8	Dock8	0.461894	2.00968	0.00977953	+	0.0206717	+	23.0138	23.4909	22.9851	22.9723	22.9887	22.9875	22.5814	22.5463	22.5818	22.4443	13	13	13	8.8	8.8	8.8	238.98	0	71.619	241540000	61	22.9417	23.0568	23.0429	23.2337	23.6329	23.606	23.2067	22.6631	23.0855	22.9696	22.9666	22.9807	22.8843	23.1903	22.8916	22.9176	23.0358	23.0091	22.7588	22.2876
P32233	Developmentally-regulated GTP-binding protein 1	Drg1	-0.45146	2.59357	0.00254934	+	0.0129565	+	19.6784	19.6843	19.7776	19.7998	19.9169	20.2304	19.8617	20.3717	20.2676	20.3829	3	3	3	9.5	9.5	9.5	40.512	0	3.018	26120000	6	19.8308	19.6478	19.5567	19.808	19.8816	19.3632	NaN	19.6912	19.8639	19.8216	19.7791	19.7987	19.6181	19.8146	20.318	20.6858	20.1839	19.8216	19.8335	19.8899
Q9CQ43;Q8VCG1		Dut	-0.513144	3.06397	0.000863037	+	0.00659361	+	23.37	23.7247	23.4565	23.4465	23.6119	24.325	24.0097	23.981	23.8764	23.9831	4	4	4	31.5	31.5	31.5	17.384	0	15.996	449790000	47	23.5167	23.2165	23.3769	23.5034	23.7345	23.9362	23.4548	23.5124	23.4022	23.4584	23.4744	23.4065	23.442	23.6623	23.7314	24.2005	24.5381	24.2364	24.0563	23.9711
Q9JHU4	Cytoplasmic dynein 1 heavy chain 1	Dync1h1	-0.518213	1.59803	0.0252333	+	0.0295695	+	21.3973	21.4898	21.3579	21.1488	21.0597	21.9876	21.2316	22.1297	21.6108	22.0848	9	9	9	2.1	2.1	2.1	532.04	0	8.1833	92637000	25	21.2549	21.3035	21.6334	21.6606	21.5428	21.2659	21.2859	21.3964	21.3914	21.0906	21.2808	21.0751	20.7369	21.0782	21.3642	22.1148	22.0665	21.7815	21.9863	21.9852
Q8BH95	Enoyl-CoA hydratase, mitochondrial	Echs1	0.592287	2.19065	0.00644686	+	0.0120395	+	21.172	21.0955	21.3451	21.2189	20.9367	20.7842	20.7019	19.9784	20.6622	20.68	2	2	2	11	11	11	31.474	0	3.6839	65437000	24	20.9826	21.4989	21.0344	20.5414	21.2601	21.485	21.2574	21.5984	21.1796	21.2684	20.7423	21.646	21.1793	20.8752	20.7557	20.6037	20.7365	21.0123	20.8139	20.4694
Q6PDI5-2;Q6PDI5;A2ALV7	Proteasome-associated protein ECM29 homolog	Ecm29;AI314180	-0.740093	3.89592	0.000127082	+	0.00133333	+	19.8999	19.9039	19.8987	19.9674	19.6608	20.9562	20.6311	20.5226	20.4222	20.499	5	5	5	3.3	3.3	3.3	203.91	0	5.5191	38319000	14	19.6823	19.7656	20.2519	19.9369	19.9594	19.8153	19.8791	19.8302	19.9866	19.8785	19.839	20.1847	19.9923	19.4658	19.5243	20.864	20.8604	21.1441	20.641	20.629
P10126;D3YZ68	Elongation factor 1-alpha 1	Eef1a1	-0.738505	5.85141	1.40795e-06	+	0.000307692	+	28.8746	28.8817	28.899	28.6721	28.7509	29.7036	29.5047	29.5298	29.5121	29.5206	24	24	24	62.6	62.6	62.6	50.113	0	323.31	19156000000	410	28.8302	28.8191	28.9747	28.8853	29.0204	28.7394	28.9985	28.7927	28.9057	28.7602	28.6361	28.6199	28.7532	28.7208	28.7787	29.7539	29.7046	29.6525	29.4812	29.5938
A0A087WS46;O70251	Elongation factor 1-beta	Eef1b2;Eef1b	-0.265088	2.67463	0.00211527	+	0.0386908	+	24.9409	24.9496	25.1636	24.9716	25.0421	25.3621	25.3133	25.2168	25.144	25.357	6	4	4	36.4	29.9	29.9	20.136	0	28.747	1113600000	32	24.6078	25.2253	24.9898	25.1584	24.9986	24.6918	25.3351	25.1128	25.0429	25.0141	25.018	24.8826	24.9604	25.1041	25.0618	25.3104	25.418	25.3579	25.2576	25.2057
Q9D8N0	Elongation factor 1-gamma	Eef1g	-0.376783	3.20456	0.000624366	+	0.0128153	+	26.316	26.3683	26.2977	26.19	26.2563	26.8925	26.6966	26.5787	26.549	26.5955	13	13	13	37.1	37.1	37.1	50.06	0	323.31	2894500000	189	26.2442	26.3236	26.3802	26.4069	26.1255	26.5723	26.3924	26.3325	26.1683	26.1643	26.0995	26.3062	26.1275	26.2428	26.3986	26.9175	27.0284	26.7314	26.6674	26.7366
P58252	Elongation factor 2	Eef2	-0.407822	4.22351	5.97706e-05	+	0.00557214	+	28.5218	28.5285	28.4491	28.3163	28.4479	28.9649	28.9343	28.786	28.8214	28.7961	40	40	39	58	58	56.9	95.313	0	323.31	13348000000	490	28.4795	28.5254	28.5603	28.5013	28.5569	28.5273	28.4542	28.4541	28.4391	28.2831	28.2705	28.3952	28.4767	28.4114	28.4556	28.9766	29.0297	28.8884	28.8974	29.0011
Q8C845;Q9D8Y0	EF-hand domain-containing protein D2	Efhd2	0.550155	2.73635	0.00183504	+	0.00733054	+	22.6229	22.8064	22.3934	22.8021	22.632	22.2181	22.0422	22.1643	21.7692	22.3122	5	5	5	24.6	24.6	24.6	26.8	0	45.211	174100000	51	22.7376	22.4781	22.6532	22.88	22.7311	22.808	22.4619	22.2081	22.5101	22.9329	22.6494	22.824	22.3499	22.6559	22.8901	22.4496	22.3771	21.8275	21.8042	22.2091
A2AH85;O08810;G3UZ34	116 kDa U5 small nuclear ribonucleoprotein component	Eftud2	0.394074	1.58507	0.0259972	+	0.0439387	+	25.2667	24.918	24.9518	25.0365	25.2118	24.7408	24.8575	24.9101	24.7079	24.1981	23	22	22	30	29	29	109.49	0	119.17	958430000	103	25.2466	25.3621	25.1915	24.7402	24.8042	25.2096	25.0717	24.5919	25.1916	25.0926	25.0774	24.9396	25.0272	25.2518	25.3563	25.0938	24.7559	24.3727	24.9741	24.8128
Q6ZWX6	Eukaryotic translation initiation factor 2 subunit 1	Eif2s1	-0.359848	3.904	0.000124738	+	0.0100513	+	23.3153	23.4555	23.36	23.2772	23.2087	23.7076	23.5951	23.7734	23.6286	23.7113	5	5	5	18.4	18.4	18.4	36.108	0	40.47	366710000	84	23.3056	23.2935	23.3467	23.4524	23.4321	23.4821	23.3973	23.3454	23.3373	23.1182	23.1108	23.6026	23.0664	23.3233	23.2363	23.8304	23.6823	23.6102	23.6597	23.5821
Q99L45	Eukaryotic translation initiation factor 2 subunit 2	Eif2s2	-1.09323	4.06249	8.65986e-05	+	0.000648649	+	21.4116	22.2186	22.1408	21.9934	22.0118	23.1487	22.9123	23.0249	22.9841	23.1722	4	4	4	13.3	13.3	13.3	38.092	0	5.3982	188880000	42	21.8053	20.3117	22.1177	22.2283	22.2963	22.1312	21.9121	22.1306	22.3796	21.8908	22.2205	21.8688	21.9402	22.2205	21.8746	23.4029	22.879	23.1643	23.1635	22.792
Q9Z0N1;A2AAW9;Q9Z0N2	Eukaryotic translation initiation factor 2 subunit 3, X-linked;Eukaryotic translation initiation factor 2 subunit 3, Y-linked	Eif2s3x;Eif2s3y	-0.546842	2.63599	0.00231212	+	0.00781395	+	23.2833	23.4403	22.775	23.2669	23.1924	23.6148	23.8247	23.8515	23.5952	23.8059	8	8	8	23.1	23.1	23.1	51.065	0	37.968	361050000	84	23.4051	23.1206	23.3243	23.6752	23.4902	23.1556	23.575	21.7911	22.959	23.2008	23.2303	23.3697	23.407	23.0665	23.1035	23.8937	23.4211	23.5296	23.6225	23.8749
O70194	Eukaryotic translation initiation factor 3 subunit D	Eif3d	-0.523743	4.74357	1.80482e-05	+	0.00181053	+	22.8291	22.6539	22.7068	22.6883	22.7569	23.4381	23.2137	23.2561	23.1778	23.168	8	8	8	17	17	17	63.988	0	8.9821	255040000	40	22.9625	22.8305	22.6944	22.6242	22.5796	22.7577	22.6878	22.6421	22.7906	22.4936	22.642	22.9293	22.8801	22.7947	22.5959	23.5309	23.5926	23.1908	23.2445	23.3095
Q9Z1D1	Eukaryotic translation initiation factor 3 subunit G	Eif3g	-0.434134	2.65352	0.00222065	+	0.0129512	+	21.2988	21.1582	21.3947	21.1193	21.3268	21.3907	21.7473	21.7597	21.6789	21.8918	3	3	3	9.4	9.4	9.4	35.638	0	3.274	93556000	17	21.1044	21.4634	21.3285	20.8641	21.0964	21.5141	21.5945	21.2231	21.3666	21.3012	20.6191	21.4375	21.3474	21.4483	21.1848	19.4986	21.9589	22.7147	21.6312	21.4818
Q8QZY1	Eukaryotic translation initiation factor 3 subunit L	Eif3l	-0.30105	3.18078	0.00065951	+	0.02134	+	24.5034	24.655	24.6012	24.4815	24.5267	25.0226	24.8458	24.8583	24.772	24.7744	13	13	13	26.8	26.8	26.8	66.612	0	34.612	843480000	100	24.5914	24.4516	24.4672	24.6793	24.8792	24.4067	24.6861	24.6371	24.4803	24.4482	24.4799	24.5165	24.6125	24.4189	24.5488	25.0652	25.0506	24.952	24.9105	24.9167
P60843	Eukaryotic initiation factor 4A-I	Eif4a1	-0.392585	4.47327	3.36299e-05	+	0.0056	+	27.0631	26.9704	26.8943	26.95	26.987	27.4735	27.4138	27.3363	27.2435	27.3607	19	19	12	51.7	51.7	34.2	46.153	0	323.31	4690900000	206	26.9134	27.132	27.1438	26.9007	27.0505	26.9601	26.798	26.9546	26.9304	26.9686	26.932	26.9493	26.8841	27.1766	26.9004	27.4564	27.7125	27.2517	27.4182	27.4492
E9PVC6;E9Q9E1;E9PVC5;Q6NZJ6-2;Q6NZJ6;A0A0J9YUS5;A0A0J9YVC1;A0A0J9YUC1;E9Q770	Eukaryotic translation initiation factor 4 gamma 1	Eif4g1	-0.651598	4.67407	2.11802e-05	+	0.00105882	+	20.9362	21.0208	20.8551	20.8288	20.9468	21.4778	21.6724	21.6101	21.3652	21.7201	4	4	4	3.8	3.8	3.8	171.28	0	4.2142	72211000	12	20.2357	20.8619	21.7109	20.8509	NaN	21.1906	20.6949	20.8924	20.9779	20.7969	20.8608	NaN	20.8231	20.8892	21.1281	20.8242	22.0498	21.5594	21.5135	21.7283
F7CBP1;G3XA17		Eif4g2	-0.536216	3.98658	0.000103139	+	0.00313846	+	20.9426	21.056	20.9326	21.0071	20.9695	21.6201	21.7023	21.509	21.4811	21.2764	5	5	1	6.1	6.1	1.5	97.888	0	5.2883	76001000	13	21.3769	20.2876	21.1634	21.0624	20.8757	21.2298	21.0038	20.9936	20.8004	21.1075	20.9152	20.9986	20.7735	21.3119	20.8231	21.7108	21.6935	21.4559	21.6022	21.2974
B1ATP7;Q80Y81-2;Q80Y81	Zinc phosphodiesterase ELAC protein 2	Elac2	-0.323805	2.52927	0.00295618	+	0.0270989	+	19.7441	19.8961	19.6396	19.972	19.747	20.0877	20.1856	20.1936	19.9466	20.2042	2	2	2	3.3	3.3	3.3	91.946	0	2.7608	29012000	2	19.7562	19.5395	19.9368	19.8628	19.9077	19.9177	19.7407	19.5385	NaN	19.8407	20.2405	19.8347	19.6752	NaN	19.8187	20.0982	20.2232	19.9419	19.9982	20.1241
P21995	Embigin	Emb	0.892004	3.78763	0.000163069	+	0.000615385	+	23.6478	23.5482	23.5382	23.7367	23.5051	22.7625	22.2053	22.8314	22.9253	22.7914	5	5	5	15.2	15.2	15.2	37.064	0	14.941	302360000	47	23.4869	23.7261	23.7306	23.816	23.3815	23.447	23.6466	23.5526	23.4153	23.6908	23.6707	23.8486	23.3529	23.5306	23.6319	22.8036	22.8695	22.6145	20.6656	22.9061
P17182;Q6PHC1	Alpha-enolase	Eno1	-0.295248	4.40225	3.9605e-05	+	0.0137075	+	30.5245	30.491	30.4464	30.3764	30.4545	30.8471	30.7736	30.6965	30.737	30.7147	28	28	28	82.3	82.3	82.3	47.14	0	323.31	52112000000	811	30.4779	30.5081	30.5875	30.4841	30.522	30.4667	30.4282	30.4739	30.437	30.3593	30.319	30.4507	30.392	30.4685	30.5028	30.8786	30.7817	30.8811	30.718	30.7728
Q8CGC7	Bifunctional glutamate/proline--tRNA ligase;Glutamate--tRNA ligase;Proline--tRNA ligase	Eprs	-0.559849	5.28178	5.22663e-06	+	0.00135211	+	24.0332	23.9321	24.0191	23.8577	23.847	24.5411	24.4117	24.5786	24.4148	24.5423	20	20	20	19	19	19	170.08	0	38.226	595170000	147	24.0048	24.0635	24.0315	23.8974	23.9885	23.9106	23.8816	24.1568	24.0189	23.8306	23.8631	23.8796	23.8956	23.7497	23.8958	24.4876	24.614	24.5217	24.334	24.4246
Q9EQH2	Endoplasmic reticulum aminopeptidase 1	Erap1	0.547925	2.63397	0.00232288	+	0.00781323	+	24.7811	24.5096	24.5472	24.4815	24.4367	24.2017	24.1319	24.0124	24.0872	23.5835	15	15	15	21.2	21.2	21.2	106.6	0	126.11	674620000	88	24.8736	24.668	24.8017	24.5062	24.434	24.5888	24.4098	24.6112	24.6206	24.5228	24.4686	24.4532	24.6375	24.4626	24.21	24.3178	24.1249	24.1624	24.0185	24.2028
P84089;A0A1W2P7H9;A0A1W2P7T3;G3UW85	Enhancer of rudimentary homolog	Erh	0.940807	2.64271	0.00227664	+	0.00334247	+	25.7283	25.8408	25.5182	25.5829	25.4044	25.1096	24.6052	24.1564	24.3493	25.15	4	4	4	64.4	64.4	64.4	12.259	0	323.31	1232900000	39	25.6957	25.7184	25.7708	25.7326	25.8904	25.8994	25.6503	25.5521	25.3521	25.4176	25.5614	25.7697	25.2941	25.4831	25.4361	25.4198	24.8682	25.0408	25.1187	23.7924
Q8R180;A0A2I3BPM1	ERO1-like protein alpha	Ero1l	-0.88506	3.63482	0.000231836	+	0.00137143	+	24.8719	24.8817	24.2463	24.6807	24.8517	25.5918	25.8568	25.4536	25.5784	25.477	12	12	12	34.3	34.3	34.3	54.084	0	29.679	1204400000	56	25.0842	24.6565	24.8751	24.9145	24.7084	25.0223	24.7196	24.1853	23.834	24.551	24.8687	24.6224	24.7232	24.8776	24.9543	25.5468	25.5185	25.71	25.7313	25.9409
Q8BWY3	Eukaryotic peptide chain release factor subunit 1	Etf1	-0.699724	1.78246	0.0165021	+	0.0150873	+	21.9862	22.0869	21.8383	21.9235	22.0867	23.1156	22.9589	22.8543	22.6647	21.8268	6	6	6	17.2	17.2	17.2	49.03	0	8.127	174570000	42	21.8614	22.0459	22.0512	21.996	22.1289	22.1357	21.6201	21.9048	21.9899	21.9281	21.8737	21.9687	21.9153	22.2408	22.104	23.1376	23.3112	22.8978	22.9245	22.929
Q9DCW4;A0A0U1RNR3;A0A0U1RNP5;A0A0N4SVE0;A0A0U1RQB4;A0A0N4SWE9	Electron transfer flavoprotein subunit beta	Etfb	0.517768	2.61613	0.00242029	+	0.0100882	+	23.8041	23.801	24.1488	23.8547	23.5829	23.3498	23.4349	23.0269	23.3385	23.4526	8	8	8	36.5	36.5	36.5	27.623	0	10.545	398280000	40	23.753	23.7159	23.9433	23.6125	23.926	23.8646	24.418	24.1322	23.8963	23.8709	23.7154	23.9779	23.6481	23.4604	23.6403	23.4405	23.2815	23.3275	23.5225	23.4546
F8WJB9;P70429-2;P70429;E9PVP4;A0A1Y7VJA2	Ena/VASP-like protein	Evl	0.787069	3.28027	0.000524487	+	0.00227451	+	22.1141	21.7874	22.0408	22.2034	21.963	21.5164	21.4149	21.1894	20.8056	21.2471	5	5	5	15	15	15	42.893	0	5.5671	102660000	18	22.3463	21.882	NaN	21.7684	22.0012	21.5927	21.6163	22.5674	21.9387	22.2726	22.0608	22.2767	22.1106	21.6836	22.0948	21.3865	21.6698	21.4928	21.5238	21.1744
Q921I9;A0A2R8VHM9	Exosome complex component RRP41	Exosc4	1.06733	2.56906	0.00269739	+	0.00316279	+	20.9994	20.8953	20.8962	20.7863	20.7435	19.9079	20.1324	20.1793	18.8394	19.9251	2	2	2	9.4	9.4	9.4	26.249	0	3.4867	44664000	25	21.0291	20.8044	21.1646	20.9903	21.0409	20.6548	21.0505	20.742	NaN	20.935	20.7746	20.6493	21.1435	20.1866	20.9004	20.0778	19.7014	19.9444	19.9415	20.3396
Q05816	Fatty acid-binding protein, epidermal	Fabp5	-0.437976	3.54009	0.000288346	+	0.00688288	+	23.7869	24.1959	23.9812	24.0692	24.0922	24.4574	24.476	24.5354	24.4159	24.4305	4	4	4	41.5	41.5	41.5	15.137	0	88.569	635700000	41	24.0281	23.2077	24.125	24.1836	24.1889	24.2153	24.0195	24.0536	23.8704	23.9359	23.9655	24.3061	23.8183	24.2256	24.2327	24.5195	24.3562	24.4967	24.7736	24.3943
Q9WUA2	Phenylalanine--tRNA ligase beta subunit	Farsb	-0.270225	2.64676	0.0022555	+	0.0379552	+	23.359	23.3483	23.0803	23.1647	23.2435	23.584	23.5171	23.5501	23.408	23.4876	10	10	10	19.5	19.5	19.5	65.696	0	13.364	336160000	77	23.2433	23.4575	23.3761	23.2514	23.4044	23.389	23.1129	23.1121	23.016	23.1687	23.1772	23.1483	23.0895	23.3397	23.3012	23.5647	23.6983	23.4892	23.4928	23.5305
P19096;A0A0U1RNJ1	Fatty acid synthase;[Acyl-carrier-protein] S-acetyltransferase;[Acyl-carrier-protein] S-malonyltransferase;3-oxoacyl-[acyl-carrier-protein] synthase;3-oxoacyl-[acyl-carrier-protein] reductase;3-hydroxyacyl-[acyl-carrier-protein] dehydratase;Enoyl-[acyl-carrier-protein] reductase;Oleoyl-[acyl-carrier-protein] hydrolase	Fasn	-0.644628	6.12401	7.51608e-07	+	0.000666667	+	25.7146	25.4814	25.6032	25.492	25.5578	26.2861	26.1986	26.1783	26.2261	26.1831	47	47	47	28	28	28	272.43	0	323.31	1941000000	301	25.622	25.6821	25.8397	25.3956	25.4806	25.5681	25.6706	25.5349	25.6042	25.4375	25.4851	25.5535	25.4594	25.6475	25.5666	26.2088	26.3981	26.2515	26.1652	26.2188
Q642K5;P62862	40S ribosomal protein S30	Fau	-0.405765	4.38387	4.13172e-05	+	0.00525888	+	23.9153	24.0907	24.0206	23.8843	23.9612	24.4202	24.4438	24.2493	24.3871	24.4005	1	1	1	7.5	7.5	7.5	14.416	0	43.239	476360000	15	23.7268	23.9351	24.0841	24.1533	NaN	24.0281	NaN	24.0234	24.0178	24.1618	23.6836	23.8074	NaN	24.0243	23.8981	NaN	24.4783	24.3621	24.5927	24.3211
P35550	rRNA 2-O-methyltransferase fibrillarin	Fbl	-0.792603	2.16623	0.00681979	+	0.0075	+	23.8588	22.6954	23.4475	23.3249	23.855	24.0861	24.1865	24.3609	24.303	24.2082	7	7	7	33	33	33	34.306	0	29.97	482390000	25	23.8094	23.7262	24.0407	23.6784	20.713	23.6949	23.8034	23.262	23.2772	23.2847	23.4836	23.2063	24.0889	23.6757	23.8005	23.671	24.1189	24.4682	24.2271	24.2025
Q920E5;A0A0G2JEA5;A0A0G2JEB3;A0A0G2JDJ5;A0A0G2JE82	Farnesyl pyrophosphate synthase	Fdps	-0.74924	2.61161	0.00244564	+	0.00462703	+	24.3057	23.636	23.6562	24.0422	23.7306	24.2104	24.8277	24.7734	24.559	24.7463	10	10	10	36.5	36.5	36.5	40.581	0	116.11	654210000	62	24.4146	24.2686	24.2338	23.7362	23.2684	23.9032	23.6378	23.4463	23.8846	23.9461	24.0811	24.0996	23.6453	23.9824	23.5641	23.7004	25.1424	23.7885	24.6301	24.8956
Q61578	NADPH:adrenodoxin oxidoreductase, mitochondrial	Fdxr	0.564782	2.073	0.00845283	+	0.0141584	+	20.072	20.6144	20.9472	20.6649	20.395	19.7369	20.0839	20.0791	19.8763	20.0934	2	2	2	5.1	5.1	5.1	54.201	0	2.3585	36820000	10	20.6948	19.5423	19.979	20.5931	NaN	20.6357	21.5077	20.7218	20.6121	20.4929	20.5418	20.96	NaN	20.3168	20.4732	20.1296	18.9581	20.1231	20.1217	20.0002
Q8K1B8	Fermitin family homolog 3	Fermt3	-0.60043	5.51001	3.09021e-06	+	0.000666667	+	22.6303	22.6501	22.7135	22.6111	22.51	23.3012	23.0928	23.2224	23.1844	23.3163	8	8	8	15.8	15.8	15.8	75.634	0	10.062	240640000	51	22.7036	22.4779	22.7093	22.6584	22.7597	22.5323	22.6674	22.6605	22.8125	22.6307	22.6104	22.5921	22.4876	22.422	22.6204	23.3649	23.1689	23.3697	23.2716	22.9836
D3Z3F1;Q9D824-4;Q9D824-3;Q9D824-2;Q9D824	Pre-mRNA 3-end-processing factor FIP1	Fip1l1	0.335602	3.71332	0.000193501	+	0.012947	+	21.3208	21.2689	21.1385	21.1658	21.2159	20.9838	20.8894	20.9022	20.7413	20.9152	3	3	3	10.1	10.1	10.1	46.449	0	3.5802	70950000	10	21.6194	21.0342	21.3088	21.1202	21.136	21.5504	21.2641	21.1711	20.9803	21.1669	20.9259	21.4046	21.1581	21.3256	21.164	20.6887	21.1696	21.0931	21.0605	21.0072
P26883	Peptidyl-prolyl cis-trans isomerase FKBP1A	Fkbp1a	-0.648385	3.08976	0.000813278	+	0.00362963	+	22.8073	23.2149	22.8464	22.8622	22.7978	23.2437	23.585	23.7626	23.4408	23.7384	4	4	4	49.1	49.1	49.1	11.922	0	74.392	320310000	45	22.8187	22.792	22.8113	23.0356	23.4121	23.1969	23.0446	22.9915	22.5031	22.5495	22.9443	23.0929	22.6861	23.074	22.6334	23.4605	23.5784	22.6922	23.6432	23.643
Q62446;A0A1Y7VMJ9;A0A1Y7VP01;A0A1Y7VLK0	Peptidyl-prolyl cis-trans isomerase FKBP3	Fkbp3	-0.716636	2.71303	0.00193627	+	0.00410989	+	22.2073	21.5913	22.0538	21.8574	22.352	22.868	22.7771	22.8498	22.3996	22.7505	3	3	3	17.9	17.9	17.9	25.147	0	3.5737	152630000	12	22.2055	22.2853	22.1312	21.6937	NaN	21.489	NaN	22.0168	22.0908	NaN	21.6677	22.0472	22.7701	21.7725	22.5134	23.1695	22.614	22.8206	22.8832	22.6029
P30416	Peptidyl-prolyl cis-trans isomerase FKBP4;Peptidyl-prolyl cis-trans isomerase FKBP4, N-terminally processed	Fkbp4	-0.495459	2.49893	0.00317011	+	0.0121192	+	23.3601	23.9107	23.6829	23.5954	23.7496	24.3921	24.043	24.1474	24.2429	23.9506	10	10	10	30.6	30.6	30.6	51.572	0	12.544	485480000	39	23.5684	23.4804	23.0316	23.8648	24.0299	23.8374	23.7023	23.5935	23.7529	23.4344	23.6734	23.6783	23.6424	23.7764	23.8302	24.4302	24.4913	24.2547	24.2029	23.5933
B7FAU9;Q8BTM8;B7FAV1	Filamin-A	Flna	0.630853	3.37717	0.000419591	+	0.00326241	+	25.7886	25.9244	25.6787	25.6835	25.8062	25.5318	25.0692	25.1086	24.963	25.0545	40	40	36	21.6	21.6	20.3	280.5	0	110.47	1448900000	169	25.7411	25.7326	25.8922	25.8404	25.8343	26.0985	25.7341	25.5335	25.7684	25.6841	25.5561	25.8101	25.7623	25.8137	25.8427	25.5876	25.376	25.6318	25.2155	24.869
Q80X90	Filamin-B	Flnb	0.853878	4.93899	1.15083e-05	+	0.00025	+	19.4101	19.3004	19.2761	18.9914	19.358	18.3016	18.4899	18.5256	18.2788	18.4708	6	2	2	2.3	1	1	277.82	0	2.8216	13538000	7	19.6868	19.2871	19.2565	19.2345	19.3069	19.3599	19.3358	NaN	19.2165	19.0816	19.0521	18.8405	19.3602	19.5644	19.1492	18.0251	18.5366	18.3433	18.4899	NaN
O35943	Frataxin, mitochondrial;Frataxin intermediate form;Frataxin mature form	Fxn	0.915514	2.76246	0.001728	+	0.003072	+	21.0912	21.1287	21.7813	21.4345	21.4654	20.6078	19.9555	20.2993	20.6262	20.8347	3	3	3	19.8	19.8	19.8	22.924	0	16.23	61770000	29	20.7203	21.256	21.2972	20.8601	21.2138	21.3121	21.5829	NaN	21.9797	21.1145	21.1354	22.0537	22.0951	NaN	20.8357	20.7233	NaN	20.4924	20.4164	NaN
D3YZ57;P39688-2;P39688;Q04736	Non-specific protein-tyrosine kinase;Tyrosine-protein kinase Fyn;Tyrosine-protein kinase Yes	Fyn;Yes1	1.57227	4.37881	4.18017e-05	+	0	+	21.1391	20.6948	20.7575	21.0222	20.9766	19.3565	19.7184	19.4451	19.5282	18.6807	4	3	3	8.9	6.8	6.8	54.426	0	3.029	42228000	13	21.2255	20.9941	21.1978	20.1528	21.4683	20.4632	20.4353	21.325	20.5121	21.2363	21.2836	20.5467	21.1757	20.5508	21.2033	19.2509	19.6939	19.1247	19.3223	19.9108
Q9R0N0	Galactokinase	Galk1	-0.857875	2.13076	0.00740017	+	0.00713793	+	22.8525	24.1018	24.1361	23.9458	23.9359	24.6934	24.6906	24.5547	24.6017	24.7211	7	7	7	25.3	25.3	25.3	42.295	0	12.875	643570000	56	23.84	21.4907	23.2268	24.1406	24.0107	24.1542	24.1831	24.1082	24.1171	24.0886	23.5798	24.1689	23.9266	23.9617	23.9193	24.7909	24.6739	24.6154	24.5545	24.6425
Q9CZD3	Glycine--tRNA ligase	Gars	-0.630124	4.36742	4.29118e-05	+	0.00146835	+	23.7347	23.5939	23.3965	23.6823	23.5966	24.3358	24.2396	24.3272	24.212	24.0401	11	11	11	20.3	20.3	20.3	81.877	0	14.094	481720000	58	24.0202	23.5975	23.5862	23.6171	23.7548	23.4099	22.8971	23.5658	23.7267	23.4603	23.767	23.8198	23.6667	23.6619	23.4613	24.3235	24.3449	24.3391	24.1444	24.4074
E9PVA8		Gcn1l1	-0.630906	2.38017	0.00416702	+	0.00784556	+	19.8151	19.5036	19.6993	19.0028	19.3536	20.2521	20.2879	19.9308	19.9753	20.0828	2	2	2	0.9	0.9	0.9	293.02	0.00074627	2.1794	25699000	9	19.6352	19.7985	20.0117	19.6194	19.5628	19.3285	NaN	NaN	19.6993	19.0766	19.1505	18.7814	19.3461	19.4669	19.2478	20.0551	20.6852	20.0159	20.3457	20.406
P47856-2;P47856;D3YYE0;D3YYD9;Q9Z2Z9	Glutamine--fructose-6-phosphate aminotransferase [isomerizing] 1;Glutamine--fructose-6-phosphate aminotransferase [isomerizing] 2	Gfpt1;Gfpt2	-0.347156	3.59158	0.000256108	+	0.0128435	+	19.4675	19.5249	19.3783	19.2164	19.451	19.7115	19.7319	19.7505	19.7684	19.8116	2	2	2	2.3	2.3	2.3	76.722	0.0071615	1.6023	22047000	2	19.4763	19.5476	19.3786	19.6806	19.4544	19.4396	19.2425	19.4413	19.4512	18.9359	19.4174	19.296	19.451	NaN	NaN	19.6309	19.5874	19.9162	19.7819	19.7087
Q9Z0L8-2;Q9Z0L8	Gamma-glutamyl hydrolase	Ggh	1.36556	1.36157	0.0434943	+	0.0175615	+	20.2534	20.1402	20.6636	20.1688	20.118	19.5003	19.9379	18.9272	16.7532	19.3977	3	3	3	11.1	11.1	11.1	35.377	0	2.7818	19984000	8	NaN	20.2534	NaN	20.1402	NaN	NaN	NaN	20.6636	NaN	20.2463	20.3624	19.8978	20.0033	20.2409	20.1099	19.2441	19.4919	19.7649	20.1122	20.3222
D3YTN4;D3YWB5;Q99JY3	GTPase IMAP family member 4	Gimap4	0.847617	5.31954	4.7914e-06	+	0.000380952	+	25.7463	25.8597	25.8586	25.8167	25.9084	25.0318	25.1174	24.7327	25.136	24.9338	14	14	14	56.4	56.4	56.4	38.044	0	69.686	1428700000	87	25.7038	25.6688	25.8663	25.7005	25.827	26.0516	25.9367	25.7502	25.889	25.6964	25.809	25.9447	25.8372	25.9371	25.9508	24.8865	24.9075	25.3014	24.8705	25.1828
Q9CYL5;B1AWD6	Golgi-associated plant pathogenesis-related protein 1	Glipr2	0.493761	4.01444	9.6729e-05	+	0.00351899	+	23.2301	22.9926	23.3332	23.3357	23.1686	22.7623	22.6611	22.6943	22.6717	22.802	3	3	3	37	37	37	17.09	0	3.5708	271000000	8	22.893	23.2342	23.5631	23.4574	22.0294	23.4911	23.0819	23.6288	23.2888	23.5398	23.3001	23.1671	23.1607	23.0206	23.3246	22.7556	22.8362	22.6952	22.5444	22.6402
P26443	Glutamate dehydrogenase 1, mitochondrial	Glud1	0.617912	3.23491	0.000582227	+	0.00357764	+	24.8949	25.1978	25.0393	25.0266	24.8438	24.0279	24.3553	24.478	24.5255	24.5262	14	14	14	31.9	31.9	31.9	61.336	0	44.227	864860000	109	24.8501	24.8646	24.9698	25.0882	25.288	25.2173	24.9053	25.0802	25.1325	24.9221	25.0053	25.1524	24.699	24.9554	24.8771	23.5973	24.3284	24.1578	24.4032	24.3734
F6YVP7;A0A1Y7VKY1;P62270;S4R1N6	40S ribosomal protein S18	Gm10260;Rps18	-0.985619	1.70539	0.0197067	+	0.0123107	+	23.7987	24.7472	24.1182	25.3381	24.2048	25.792	25.479	24.8218	25.1278	25.9145	8	8	8	48.7	48.7	48.7	17.671	0	51.903	1173000000	29	24.6076	24.7784	22.0101	24.6316	25.0419	24.5681	25.6144	24.2998	22.4404	25.148	25.0439	25.8225	24.7459	24.7783	23.0903	25.6582	26.4606	25.2571	25.6158	25.2088
Q60648	Ganglioside GM2 activator	Gm2a	0.529136	1.66955	0.0214019	+	0.0256465	+	22.0328	22.6555	22.829	22.8151	22.8359	22.3655	22.2584	21.7755	21.9873	22.1361	2	2	2	7.8	7.8	7.8	20.824	0	2.6036	169810000	25	21.322	22.6755	22.1011	22.3997	22.8926	22.6744	23.5473	21.9042	23.0356	22.672	22.8529	22.9205	22.769	22.9252	22.8135	22.5005	22.1559	22.4401	22.436	22.142
Q9ERL7;D3Z2F6;D3YY16	Glia maturation factor gamma	Gmfg	0.906387	2.35702	0.00439521	+	0.00481283	+	24.1266	23.9787	23.8947	23.8198	24.0692	23.3225	23.2691	22.1795	23.2262	23.3598	6	6	6	50	50	50	16.748	0	84.418	403980000	64	24.0584	24.1635	24.158	24.0418	23.9226	23.9717	23.916	23.785	23.9833	23.9074	23.3799	24.172	23.929	24.0956	24.1829	23.5974	23.3621	23.0081	22.85	23.5746
Q3THK7	GMP synthase [glutamine-hydrolyzing]	Gmps	-0.436808	1.55441	0.0278988	+	0.038688	+	24.3239	24.0126	24.6787	24.3095	24.1054	25.0754	24.7862	24.4267	24.8118	24.5141	12	12	12	22.9	22.9	22.9	76.723	0	23.822	737150000	56	24.6716	24.0839	24.2162	24.836	24.7806	22.4213	24.9555	24.4931	24.5875	24.4896	24.1242	24.3146	24.2659	24.1624	23.888	24.969	25.346	24.9114	25.0023	24.5275
P08752;A0A0A6YWA9	Guanine nucleotide-binding protein G(i) subunit alpha-2	Gnai2	0.657617	6.55847	2.76392e-07	+	0.000296296	+	26.293	26.4191	26.3166	26.2213	26.3298	25.7493	25.6832	25.5885	25.627	25.6437	17	17	11	60.8	60.8	41.4	40.489	0	73.644	2125000000	112	26.0577	26.3944	26.427	26.468	26.2607	26.5286	26.1609	26.2968	26.492	26.1313	26.1666	26.3659	26.2449	26.3111	26.4333	25.7481	25.7556	25.7441	25.701	25.6437
Q9DC51	Guanine nucleotide-binding protein G(k) subunit alpha	Gnai3	0.817358	1.36498	0.0431538	+	0.0255794	+	22.3609	21.2463	20.8724	21.3134	20.8898	20.0537	21.055	20.7606	20.7065	20.0202	8	2	2	33.6	14.1	14.1	40.538	0	3.7717	49930000	4	22.418	NaN	22.3038	NaN	21.242	21.2506	NaN	NaN	20.8724	22.1371	20.9896	20.8135	NaN	20.9286	20.851	19.7585	19.8464	20.5564	19.8749	22.235
P62880;E9QKR0;D3YZX3;D3Z1T4;D3Z1M1	Guanine nucleotide-binding protein G(I)/G(S)/G(T) subunit beta-2	Gnb2	0.439402	3.8172	0.000152336	+	0.00564356	+	25.869	25.7851	25.6995	25.9161	25.842	25.4519	25.5383	25.361	25.346	25.2174	12	12	7	59.4	59.4	47.9	37.331	0	258.56	1620100000	96	25.8199	26.105	25.682	25.7864	25.7104	25.8584	25.6387	25.8009	25.6589	25.8397	26.0442	25.8644	25.81	25.8313	25.8846	25.5663	25.3114	25.478	25.6396	25.4377
P05201	Aspartate aminotransferase, cytoplasmic	Got1	-0.467666	3.06903	0.000853038	+	0.007808	+	22.9898	23.1144	23.281	22.9677	23.0232	23.4181	23.435	23.5635	23.494	23.804	10	10	10	41.4	41.4	41.4	46.247	0	11.17	317840000	43	22.72	22.9776	23.2718	23.1314	23.3026	22.9092	22.8864	23.663	23.2936	23.4061	23.1081	22.3888	23.0614	23.0265	22.9816	23.5395	23.4686	23.2461	23.2603	23.5146
P05202	Aspartate aminotransferase, mitochondrial	Got2	0.718575	5.71354	1.934e-06	+	0.000242424	+	26.43	26.4781	26.4097	26.4535	26.2746	25.7381	25.6489	25.5255	25.7532	25.7873	14	14	14	44.7	44.7	44.7	47.411	0	323.31	2221700000	111	26.5027	26.4231	26.3644	26.484	26.5165	26.4339	26.3415	26.5185	26.3691	26.4333	26.3399	26.5873	26.3079	26.2726	26.2432	25.4843	25.779	25.9511	25.6903	25.507
O89100	GRB2-related adaptor protein 2	Grap2	0.606846	1.43016	0.03714	+	0.0306231	+	24.0336	23.2754	23.8474	23.8752	23.7228	22.7223	23.4536	23.2388	23.6853	22.6202	10	10	10	50.9	50.9	50.9	36.81	0	20.611	391570000	21	24.0881	24.7095	23.3033	21.7806	23.2134	24.8323	24.6749	23.4026	23.4646	24.6907	23.5268	23.4082	24.4679	23.4853	23.2153	22.5502	23.6016	22.015	22.3392	24.3741
Q8R050-2;Q8R050	Eukaryotic peptide chain release factor GTP-binding subunit ERF3A	Gspt1	-0.575084	3.1765	0.000666041	+	0.0041326	+	22.7304	23.0147	22.9683	23.0443	23.0337	23.8632	23.3261	23.5129	23.5231	23.4416	7	7	7	14.8	14.8	14.8	68.526	0	8.046	310490000	30	22.789	23.2822	22.1201	23.0413	22.763	23.2397	23.1709	22.6247	23.1093	22.9269	23.105	23.1009	22.843	23.1569	23.1012	23.7243	24.0664	23.7988	23.5212	23.1299
Q3THK3	General transcription factor IIF subunit 1	Gtf2f1	0.363597	1.76317	0.0172515	+	0.0403451	+	20.4965	20.7381	20.4488	20.4218	20.646	20.0198	20.0613	20.5985	20.1452	20.1084	2	2	2	5.5	5.5	5.5	57.241	0	10.445	24493000	13	NaN	20.4965	NaN	20.7157	20.7604	NaN	NaN	20.2932	20.6044	20.4844	20.4777	20.3033	20.5207	20.8053	20.6122	20.0188	NaN	20.0209	NaN	20.0613
B1ASZ3;Q64516-1;Q64516-2;Q9WU65;Q64516	Glycerol kinase;Glycerol kinase 2	Gyk;Gk;Gk2	0.98527	1.4902	0.0323443	+	0.0170938	+	22.3188	22.5902	22.5758	22.5498	22.6317	21.972	20.0418	21.883	21.965	21.8782	1	1	1	1.3	1.3	1.3	59.832	0.0021053	1.8931	128120000	4	22.3188	NaN	NaN	22.5325	22.6587	22.5795	22.838	22.515	22.3745	22.3234	22.7277	22.5983	23.2184	22.2434	22.4334	21.9595	22.0656	21.8908	21.9135	NaN
P11032-2;P11032	Granzyme A	Gzma	-0.490947	2.37033	0.00426256	+	0.0129576	+	23.1126	23.5119	23.215	23.1087	23.0972	23.9315	23.9343	23.6037	23.5137	23.5168	7	7	7	38.5	38.5	38.5	28.541	0	22.69	359980000	41	23.094	23.11	23.1339	23.6998	23.3453	23.4906	23.0965	23.2239	23.3246	23.1665	23.3042	22.8553	23.1781	22.9666	23.1468	23.7605	24.0397	23.9944	24.1554	23.7924
P04187	Granzyme B(G,H)	Gzmb	-1.60361	7.34634	4.50462e-08	+	0	+	27.4791	27.5402	27.4968	27.2884	27.5374	29.2972	29.0562	29.0112	29.1047	28.8906	12	12	12	46.6	46.6	46.6	27.47	0	323.31	11420000000	308	27.3946	27.5622	27.4805	27.4866	27.5968	27.5372	27.6233	27.4157	27.4514	27.3023	27.1698	27.393	27.5531	27.5422	27.5168	29.3075	29.3641	29.2201	29.1296	29.0587
P01901;Q3TH01;G3UXW2;P04223;P04223-2	H-2 class I histocompatibility antigen, K-B alpha chain;H-2 class I histocompatibility antigen, K-K alpha chain	H2-K1	0.468002	4.4057	3.92917e-05	+	0.00349333	+	25.9868	26.1442	25.8764	25.8266	25.9492	25.4764	25.4494	25.4548	25.5158	25.5468	10	10	3	36.9	36.9	18.2	41.301	0	40.972	1748100000	73	25.9962	25.7687	26.1956	26.1664	26.0341	26.2322	25.6648	26.0321	25.9322	25.9392	25.7719	25.7687	25.8766	26.0697	25.9015	25.581	25.3947	25.4537	25.4333	25.4609
E9PWT4;E9QJR9;P14429;L7N260;P14431;P79568;P14430	H-2 class I histocompatibility antigen, Q7 alpha chain;H-2 class I histocompatibility antigen, Q9 alpha chain;H-2 class I histocompatibility antigen, Q8 alpha chain	H2-Q7;H2-Q9;H2-Q6;H2-Q8	0.471406	5.0574	8.76201e-06	+	0.00234862	+	23.3564	23.4037	23.2899	23.2158	23.2716	22.76	22.7529	22.9016	22.8535	22.9125	8	4	3	27.1	17.4	11.6	35.181	0	11.641	267100000	22	23.3721	23.3772	23.32	23.3354	23.3017	23.574	23.3853	23.2738	23.2106	23.4334	23.1397	23.0742	23.1779	23.3578	23.279	22.777	22.3795	23.1234	22.4366	23.0428
Q8BMS1	Trifunctional enzyme subunit alpha, mitochondrial;Long-chain enoyl-CoA hydratase;Long chain 3-hydroxyacyl-CoA dehydrogenase	Hadha	0.717615	2.32104	0.00477481	+	0.00708085	+	21.7758	21.9059	22.1456	22	21.7746	21.1423	20.5851	21.4984	21.5429	21.245	6	6	6	8.7	8.7	8.7	82.669	0	6.2787	99869000	15	22.4126	20.4158	22.4989	21.9199	22.0784	21.7195	22.1066	22.4494	21.8807	22.1065	21.7505	22.1429	21.9127	21.6204	21.7907	21.0785	20.9977	21.3508	19.1513	21.4003
Q8VDJ3;A0A087WP83	Vigilin	Hdlbp	-1.33383	5.09455	8.04356e-06	+	0	+	20.0944	20.1453	20.24	19.8724	20.1831	21.6925	21.6485	21.0866	21.5173	21.2596	4	4	4	4.3	4.3	4.3	141.74	0	19.207	52952000	23	20.2101	19.9802	20.0927	NaN	NaN	20.1453	20.2541	20.2558	20.2103	20.0679	19.677	NaN	NaN	20.0676	20.2986	21.6853	21.9928	21.3993	21.4334	21.6957
P20060	Beta-hexosaminidase subunit beta	Hexb	0.648479	2.09366	0.00806014	+	0.0118261	+	21.1045	21.3816	21.208	20.681	21.2316	20.8158	20.7618	20.0646	20.2848	20.4372	3	3	3	5.4	5.4	5.4	61.115	0	3.0045	62417000	25	21.0272	21.3018	20.9845	21.3196	21.4687	21.3567	20.7776	21.4064	21.4399	20.5796	21.4952	19.9683	21.314	21.2679	21.1129	20.7264	20.589	21.1319	20.2551	20.7419
Q9JKY5	Huntingtin-interacting protein 1-related protein	Hip1r	0.483231	2.05127	0.00888656	+	0.0184312	+	19.9765	19.8279	20.3462	19.8551	19.6832	19.1534	19.6464	19.456	19.4362	19.5809	3	3	3	3.5	3.5	3.5	119.43	0	3.0255	24227000	8	20.0678	19.8852	NaN	19.581	20.024	19.8786	20.5897	NaN	20.1026	19.4425	20.6472	19.4755	19.3218	20.0563	19.6716	19.5195	18.8732	19.0674	19.5872	19.2884
A0A1W2P768;P84228;F8WI35;P84244;P02301;E0CZ27	Histone H3.2;Histone H3;Histone H3.3;Histone H3.3C	Hist1h3b;H3f3a;H3f3c	-1.27034	1.85896	0.0138369	+	0.0072	+	26.4237	25.5593	25.8238	27.2464	26.4603	26.9905	27.4692	27.253	28.6265	27.5261	7	7	1	38.7	38.7	17.7	20.246	0	122.36	5703800000	29	26.2311	26.6164	26.4236	25.935	25.8926	24.8504	24.9269	26.676	25.8684	26.1011	29.3721	26.2661	26.9837	25.3388	27.0583	27.393	27.3877	26.1908	27.8528	27.413
E9Q5B5;O08528	Hexokinase;Hexokinase-2	Hk2	-0.744407	3.63121	0.000233772	+	0.00170115	+	22.3139	22.4181	22.1992	22.401	22.0397	23.1199	23.1674	23.1542	22.9932	22.6592	15	12	11	20	16.5	15.3	99.213	0	11.167	201880000	31	22.4365	22.8496	21.6557	22.5236	22.3624	22.3682	22.1208	22.2842	22.1927	22.4004	22.4968	22.3059	21.9336	22.1292	22.0564	22.9164	23.1093	23.334	22.917	23.579
Q8JZK9	Hydroxymethylglutaryl-CoA synthase, cytoplasmic	Hmgcs1	-1.35673	4.06657	8.57893e-05	+	0.000363636	+	21.5029	20.9765	21.7203	21.7176	21.5964	23.329	22.7193	22.597	22.8754	22.7768	6	6	6	14.8	14.8	14.8	57.568	0	6.4778	160420000	23	21.4317	21.6086	21.4685	21.5602	19.814	21.5555	22.142	21.6926	21.3264	21.7393	21.3736	22.0399	21.8982	21.298	21.5931	23.061	23.5385	23.3875	23.421	22.6852
O88569;O88569-3;O88569-2	Heterogeneous nuclear ribonucleoproteins A2/B1	Hnrnpa2b1	0.509721	4.2246	5.96206e-05	+	0.0031746	+	29.9987	29.9516	30.07	30.0426	30.0216	29.7497	29.417	29.4514	29.5123	29.4054	23	23	23	65.7	65.7	65.7	37.402	0	323.31	28124000000	341	29.9157	29.9852	30.0951	30.0902	29.7302	30.0343	30.0817	30.0906	30.0377	30.0513	30.0695	30.0069	29.9424	30.017	30.1055	29.6845	29.8975	29.6672	29.2957	29.5092
Q8BG05-2;A2AL12;B2RXM2;Q8BG05	Heterogeneous nuclear ribonucleoprotein A3	Hnrnpa3;Gm6793	0.415652	5.76001	1.73776e-06	+	0.00278992	+	29.2274	29.3513	29.2548	29.274	29.3009	28.9541	28.8571	28.8459	28.8801	28.793	14	14	13	47.1	47.1	47.1	37.086	0	323.31	17859000000	292	29.1144	29.2061	29.3617	29.2833	29.4547	29.3159	29.2738	29.2362	29.2543	29.1569	29.2	29.4652	29.1706	29.3937	29.3385	28.9861	29.1125	28.7635	28.8266	28.8441
Q9Z130;F6VQH5;D3YTQ3	Heterogeneous nuclear ribonucleoprotein D-like	Hnrnpdl	0.493594	1.39973	0.0398359	+	0.0405547	+	23.4594	23.474	23.3549	23.3194	23.3392	23.0354	23.2252	23.1043	22.998	22.116	5	5	5	22.9	22.9	22.9	33.558	0	28.4	296920000	57	23.7138	23.351	23.3135	23.3545	23.5174	23.5503	23.4003	23.1428	23.5217	23.3177	23.4191	23.2214	23.199	23.4521	23.3665	22.7207	23.2099	23.1757	23.1421	23.2304
Q9Z2X1;Q9Z2X1-2;J3QMT0;J3QM80	Heterogeneous nuclear ribonucleoprotein F;Heterogeneous nuclear ribonucleoprotein F, N-terminally processed	Hnrnpf	0.707484	1.91922	0.0120442	+	0.0128428	+	26.6151	25.8989	25.8289	26.4387	25.9068	25.8614	25.2565	25.6036	25.4337	24.9958	12	10	10	41	34.5	34.5	45.729	0	323.31	1989600000	84	26.6976	26.8612	26.2863	26.0839	25.7862	25.8267	26.2673	26.2273	24.9922	26.286	26.2933	26.7369	26.2797	25.9231	25.5176	25.8063	25.8139	25.9642	24.6199	25.6937
P70333	Heterogeneous nuclear ribonucleoprotein H2	Hnrnph2	0.731435	1.50202	0.0314761	+	0.0220147	+	21.7089	20.721	20.5368	20.8953	20.6675	20.2469	20.471	20.4312	19.4419	20.2814	7	2	2	21.8	6.2	6.2	49.279	0	3.098	35813000	5	NaN	NaN	21.7089	20.721	NaN	NaN	20.5194	20.5618	20.5293	20.568	NaN	21.2226	20.6991	NaN	20.6359	19.2149	21.2991	20.2266	19.8212	20.2553
Q00PI9	Heterogeneous nuclear ribonucleoprotein U-like protein 2	Hnrnpul2	0.377222	4.68364	2.07188e-05	+	0.00553398	+	24.7121	24.7864	24.6455	24.6501	24.6898	24.4211	24.2898	24.2688	24.2416	24.3766	13	13	13	21.3	21.3	21.3	84.939	0	23.498	740090000	124	24.7301	24.7574	24.6487	24.7798	24.9085	24.671	24.807	24.7353	24.3943	24.6186	24.5999	24.7319	24.6934	24.6711	24.7047	24.434	24.509	24.3202	24.2898	24.2492
A0A1Y7VMK3;P62748	Hippocalcin-like protein 1	Hpcal1	1.0104	2.5818	0.00261939	+	0.00331852	+	19.8354	19.4448	19.0012	20.0971	19.695	18.6021	18.8242	NaN	18.5064	18.4845	1	1	1	7.1	7.1	7.1	19.661	0	2.5066	18450000	9	19.7159	20.4232	19.367	19.4517	19.4809	19.4019	19.1448	18.4676	19.3913	20.1136	20.1182	20.0595	19.8306	19.3196	19.9347	18.565	18.6392	NaN	19.1146	NaN
Q99N15;A2AFQ2;O08756	3-hydroxyacyl-CoA dehydrogenase type-2	Hsd17b10	0.77767	2.82733	0.00148823	+	0.00353548	+	23.0355	22.4247	23.1374	23.3552	22.7836	22.1856	22.3083	22.1417	22.1433	22.069	5	5	5	30.3	30.3	30.3	27.273	0	10.34	200350000	29	23.0583	23.2414	22.8066	21.8096	22.8025	22.662	23.0401	23.1213	23.2507	23.5091	23.3507	23.2057	22.3453	22.8965	23.109	22.115	22.3804	22.0615	22.5407	22.5904
P51660	Peroxisomal multifunctional enzyme type 2;(3R)-hydroxyacyl-CoA dehydrogenase;Enoyl-CoA hydratase 2	Hsd17b4	0.441437	4.46641	3.41656e-05	+	0.00382822	+	22.2444	22.1355	22.059	22.0706	21.9635	21.5607	21.6846	21.716	21.6635	21.6409	5	5	5	8.4	8.4	8.4	79.481	0	5.1814	121530000	57	22.3178	22.3908	22.0246	22.121	22.1433	22.1422	22.1237	22.1103	21.9431	21.97	22.2083	22.0334	21.9902	21.7528	22.1474	21.1694	21.779	21.7337	21.8352	21.563
P07901	Heat shock protein HSP 90-alpha	Hsp90aa1	-0.491737	3.77704	0.000167093	+	0.00386207	+	27.9568	27.9205	27.8285	27.6134	27.8619	28.4725	28.3579	28.2759	28.3241	28.2094	29	20	20	57.3	39.6	39.6	84.787	0	323.31	8862200000	324	27.9691	27.9629	27.9385	27.896	27.9441	27.9213	27.7999	27.795	27.8906	27.6925	27.6013	27.5464	27.8857	27.8523	27.8477	28.4107	28.5773	28.4296	28.3117	28.4859
P11499	Heat shock protein HSP 90-beta	Hsp90ab1	-0.49167	5.84425	1.43137e-06	+	0.0012987	+	29.8112	29.8553	29.7923	29.6932	29.8351	30.3756	30.3192	30.281	30.2367	30.2329	38	38	28	64.8	64.8	45.2	83.28	0	323.31	35379000000	966	29.7982	29.8571	29.7782	29.905	29.8304	29.8306	29.7524	29.8006	29.8238	29.6672	29.6908	29.7217	29.761	29.913	29.8314	30.4185	30.4644	30.244	30.3513	30.3226
Q99M31;Q99M31-2	Heat shock 70 kDa protein 14	Hspa14	-0.375219	2.63335	0.0023262	+	0.0180317	+	21.2953	21.406	20.9888	21.2878	21.1564	21.6716	21.4646	21.6602	21.5148	21.6992	2	2	2	5.3	5.3	5.3	54.65	0	5.1764	86191000	21	21.1717	21.3004	21.414	21.4723	NaN	21.3396	21.1002	20.9902	20.8758	21.1807	21.2968	21.386	20.8843	21.143	21.442	21.5332	21.9201	21.5616	21.4502	21.7048
P63017;Q504P4	Heat shock cognate 71 kDa protein	Hspa8	-0.2356	3.49028	0.000323386	+	0.0365164	+	29.5309	29.6266	29.4627	29.434	29.5277	29.8026	29.7189	29.7551	29.6926	29.7907	37	37	30	62.7	62.7	54.3	70.87	0	323.31	25613000000	794	29.4945	29.5038	29.5945	29.5974	29.668	29.6144	29.3283	29.4947	29.565	29.351	29.4262	29.5249	29.4736	29.5481	29.5613	29.7925	29.903	29.7122	29.7431	29.7159
A0A0U1RPF2;Q99P31;A0A0U1RPE7;A0A0U1RQ49	Hsp70-binding protein 1	Hspbp1	-0.418043	2.07889	0.00833888	+	0.0232386	+	20.6208	20.2064	20.391	20.5855	20.7653	21.0585	21.0231	20.9307	20.9839	20.6629	2	2	2	7.3	7.3	7.3	29.582	0.0014461	2.0171	55572000	22	NaN	20.6188	20.6228	19.4375	20.9752	NaN	20.4384	20.3435	NaN	21.3267	20.5849	19.8449	20.4401	20.6437	21.2122	20.9847	20.9128	21.2781	21.0301	21.158
E9Q0U7;Q61699-2;Q61699	Heat shock protein 105 kDa	Hsph1	-0.485061	3.6022	0.000249921	+	0.00502128	+	23.014	23.1802	22.9574	23.2868	22.9895	23.7446	23.4915	23.5233	23.5251	23.5689	13	11	11	20.6	17.9	17.9	91.677	0	30.474	317300000	49	23.1059	22.8463	23.0897	23.2389	23.2905	23.0113	23.1223	22.97	22.78	23.1771	23.331	23.3525	22.9348	23.0031	23.0306	23.0277	24.149	24.0571	23.4048	23.3196
Q8BU30	Isoleucine--tRNA ligase, cytoplasmic	Iars	-0.582438	4.61492	2.42704e-05	+	0.00156098	+	22.9914	22.9135	22.7104	22.9125	22.762	23.4942	23.575	23.414	23.3744	23.3443	10	10	10	10.6	10.6	10.6	144.27	0	11.997	290810000	63	22.9952	22.8641	23.1149	22.9334	22.8941	22.9129	22.6896	22.967	22.4746	22.8446	23.1311	22.7619	22.6635	22.7353	22.8871	23.4929	23.6014	23.3884	23.5979	23.5505
A0A1L1STE6;Q9D6R2;Q9D6R2-2	Isocitrate dehydrogenase [NAD] subunit alpha, mitochondrial	Idh3a	0.546609	1.35471	0.044187	+	0.0387625	+	24.1337	23.2361	23.3792	23.7281	23.0932	22.8906	23.2687	23.0702	23.1099	22.4979	7	7	7	31	31	31	41.52	0	20.068	322090000	25	23.9659	24.2176	24.2178	23.3237	23.1584	23.2261	23.2499	23.2653	23.6225	23.7061	23.432	24.0464	23.2614	22.8192	23.1992	23.6951	22.0871	22.8897	22.7561	23.4726
Q9ESY9	Gamma-interferon-inducible lysosomal thiol reductase	Ifi30	0.443742	2.96472	0.00108463	+	0.0103571	+	22.3061	22.2391	22.1115	22.2136	21.9861	21.968	21.6157	21.719	21.57	21.7649	3	3	3	22.2	22.2	22.2	27.784	0	4.3333	121050000	18	22.2286	22.4462	22.2436	22.1794	NaN	22.2987	22.2171	22.0387	22.0787	22.1486	22.158	22.3342	21.8754	21.8893	22.1935	21.6963	22.0382	22.1696	21.6885	21.3297
Q61635		Ifi47	1.50561	6.64424	2.26863e-07	+	0	+	23.7955	23.5292	23.5884	23.334	23.4551	22.128	22.176	22.0416	21.9331	21.8954	7	7	7	22.6	22.6	22.6	46.784	0	9.2056	254880000	32	23.4951	23.9232	23.9681	23.2977	23.8958	23.3941	23.5391	23.7504	23.4757	23.4094	23.4439	23.1488	23.439	23.4809	23.4454	22.1755	21.9462	22.2622	21.7673	22.4309
A0A1B0GT68;Q99J93	Interferon-induced transmembrane protein 2	Ifitm2	-1.34478	5.03663	9.19116e-06	+	0	+	19.4207	19.5064	19.5976	19.3234	19.3638	21.1511	20.7139	20.8247	20.3707	20.8754	1	1	1	11.8	11.8	11.8	16.693	0.0053191	1.6871	35132000	9	19.178	19.2301	19.8539	19.5835	19.4302	19.5054	19.5269	19.561	19.7049	19.1902	19.2123	19.5677	19.4594	19.133	19.4989	21.1926	21.1097	NaN	20.4115	20.515
Q9DCE9		Igtp	-0.78474	4.3492	4.47509e-05	+	0.000551724	+	22.323	22.7178	22.3312	22.1839	22.5631	23.1585	23.2922	23.2117	23.2169	23.1634	5	5	5	16.3	16.3	16.3	48.493	0	6.0264	241550000	32	22.1837	22.6041	22.1811	23.2588	22.6686	22.226	22.1351	22.5671	22.2913	21.9409	22.4859	22.125	22.9777	22.3156	22.3962	23.4695	23.0883	22.9178	22.9034	23.7966
O54824-2;O54824	Pro-interleukin-16;Interleukin-16	Il16	0.603242	1.44165	0.0361704	+	0.0303333	+	22.0632	21.7377	21.5037	21.9153	21.4934	21.5258	21.7525	20.8028	20.6631	20.953	5	5	5	11.2	11.2	11.2	66.471	0	5.1725	96511000	9	21.7214	21.9354	22.5329	21.5969	21.631	21.9854	21.4445	21.9318	21.135	22.0313	21.8459	21.8686	22.6714	20.2869	21.5219	21.4418	21.4881	21.6476	21.1552	23.1047
Q45VK5;A0A1L1STE4;Q9Z1X4-2;Q9Z1X4;Q9Z1X4-3;A0A1L1SR62;A0A1L1SQ69;A0A1L1SSU8;A0A1L1ST48	Interleukin enhancer-binding factor 3	Ilf3	-0.370132	2.2079	0.00619586	+	0.0255198	+	NaN	19.4974	19.4378	19.1543	19.5128	19.7938	19.8566	19.6872	19.9058	19.6101	2	2	2	2.8	2.8	2.8	76.347	0.007762	1.5688	16640000	2	NaN	NaN	NaN	19.4869	19.5078	NaN	19.2417	19.5715	19.5	19.1642	NaN	19.1445	19.6112	19.3533	19.5738	19.8639	19.8985	19.6189	NaN	19.8959
P24547;A0A0A6YY72	Inosine-5-monophosphate dehydrogenase 2	Impdh2	-0.481136	3.16346	0.000686342	+	0.00680702	+	24.5255	24.0371	24.4353	24.4901	24.4293	24.8362	24.8496	24.8338	24.9208	24.8825	14	14	13	38.9	38.9	37.4	55.814	0	35.734	814650000	82	24.1595	24.4731	24.9441	22.8894	24.7928	24.4291	24.6765	24.3333	24.296	24.3248	24.4666	24.679	24.5596	24.0739	24.6544	24.8075	24.92	24.781	24.8313	24.9441
Q8BKC5;Q8BKC5-2	Importin-5	Ipo5	-0.371519	3.98387	0.000103785	+	0.00784375	+	24.836	24.8701	24.6345	24.6868	24.6994	25.1899	25.152	25.0545	25.1249	25.0631	21	21	21	26.4	26.4	26.4	123.59	0	94.22	1012400000	175	24.6834	24.8882	24.9363	24.8989	24.9764	24.7352	24.5041	24.737	24.6623	24.6908	24.7034	24.6662	24.7059	24.7266	24.6656	25.3682	25.1379	25.0636	25.1088	25.1887
Q9JKF1	Ras GTPase-activating-like protein IQGAP1	Iqgap1	-0.445597	1.41689	0.0382924	+	0.0458271	+	22.4946	22.5219	22.3888	22.3879	22.7554	23.3273	23.2155	23.0936	22.4378	22.7023	11	11	11	8.8	8.8	8.8	188.74	0	11.874	217370000	31	22.5039	22.4321	22.548	22.3273	22.8949	22.3436	22.3814	22.4305	22.3544	22.5312	22.3543	22.2781	23.0511	22.5581	22.6569	23.4375	23.2432	23.3013	22.9591	23.1108
J7NUP1;Q60766-2;Q60766	Immunity-related GTPase family M protein 1	Irgm1	0.440211	2.81299	0.0015382	+	0.0117867	+	20.1234	19.7401	19.8771	20.1131	19.7469	19.5491	19.3764	19.5945	19.4221	19.4574	1	1	1	3.6	3.6	3.6	44.887	0.0094997	1.449	17768000	3	NaN	NaN	20.1234	19.8437	19.7286	19.6478	19.8771	NaN	NaN	NaN	20.2483	19.9778	NaN	19.8696	19.6242	19.7529	19.3282	19.566	NaN	19.3057
E9QNL8;E9Q5M7;D3Z627;P24063	Integrin alpha-L	Itgal	0.387343	3.15234	0.00070415	+	0.0123484	+	24.7173	24.856	24.781	24.5654	24.7578	24.3874	24.4277	24.1949	24.4824	24.2484	15	15	15	18.1	18.1	18.1	128.21	0	323.31	767320000	132	24.7835	24.9059	24.4626	24.8854	25.0461	24.6366	24.6315	24.7718	24.9398	24.377	24.6624	24.6569	24.6908	24.9042	24.6784	24.4613	24.8077	23.8933	24.3832	24.3842
Q542I8;P11835;M0QWA7	Integrin beta;Integrin beta-2	Itgb2	0.405829	3.62228	0.000238625	+	0.00764516	+	25.0831	25.2407	25.2204	25.0426	25.0174	24.8418	24.7675	24.6006	24.6232	24.7419	17	17	17	30.3	30.3	30.3	84.893	0	190.67	994910000	90	25.0631	25.1283	25.0577	25.273	25.1577	25.2914	25.2308	25.1037	25.3268	25.086	25.0164	25.0256	24.9889	25.0623	25.0008	25.0263	25.0043	24.4948	24.9856	24.6752
B1ASP2;P52332	Tyrosine-protein kinase;Tyrosine-protein kinase JAK1	Jak1	0.780045	5.26933	5.37863e-06	+	0.000235294	+	18.4595	18.529	18.5017	18.4269	18.6234	17.8999	17.5833	17.8692	17.6286	17.6594	2	2	2	2	2	2	133.35	0.0027643	1.8171	8410000	3	18.4027	18.2675	18.7084	18.5616	18.4673	18.558	18.388	18.5137	18.6034	18.6206	18.4562	18.2039	18.6405	18.4988	18.7309	17.9331	17.9409	17.8257	17.566	17.5081
Q8BNW9	Kelch repeat and BTB domain-containing protein 11	Kbtbd11	0.221482	3.29739	0.000504207	+	0.046086	+	20.9447	21.0811	20.9446	21.0886	20.9589	20.7339	20.7855	20.8498	20.7406	20.8007	3	3	3	5.8	5.8	5.8	67.945	0	3.7991	58641000	24	20.9848	20.9548	20.8945	21.0243	21.1203	21.0987	20.9065	20.9226	21.0046	21.052	21.1043	21.1096	21.1239	20.7539	20.999	20.879	20.2385	21.0842	20.6394	20.9678
A0A3B2WCD8;Q3U0V1	Far upstream element-binding protein 2	Khsrp	0.462216	2.73979	0.00182059	+	0.0112901	+	24.9539	25.0381	24.9776	25.0289	24.6824	24.2725	24.4107	24.727	24.5515	24.408	14	14	12	25.4	25.4	22.3	74.252	0	54.408	847230000	101	25.0178	24.9177	24.9261	24.8681	25.1605	25.0856	24.9812	25.1577	24.7939	24.8793	24.7545	25.4529	25.3249	25.0866	23.6356	24.332	24.1395	24.3461	24.2369	24.6989
P11438	Lysosome-associated membrane glycoprotein 1	Lamp1	0.468415	3.72746	0.000187299	+	0.00512169	+	20.8731	20.9728	20.6396	20.635	20.8125	20.3186	20.2726	20.2819	20.2896	20.4281	2	2	2	5.7	5.7	5.7	43.865	0	2.2356	44877000	16	20.9109	20.9545	20.7538	20.8314	21.0752	21.012	20.6454	NaN	20.6337	20.5529	20.4519	20.9001	21.0312	20.7652	20.6411	20.3498	20.3115	20.2946	20.3638	20.2132
Q9JHS3;D3YTS4	Ragulator complex protein LAMTOR2	Lamtor2	0.401936	1.88681	0.0129774	+	0.030233	+	20.8448	20.5726	20.4165	20.6097	20.5477	20.3854	20.2882	19.7848	20.2697	20.2536	3	3	3	24	24	24	13.48	0	2.869	46858000	19	20.9584	20.8283	20.7476	20.3026	20.6422	20.7731	20.3824	20.5653	20.3018	20.6621	20.5007	20.6664	20.4929	20.6237	20.5265	20.1454	20.6305	20.3803	20.2687	20.2516
Q8BMJ2	Leucine--tRNA ligase, cytoplasmic	Lars	-0.780733	1.95764	0.0110246	+	0.0110483	+	21.1329	20.9087	21.1671	20.9807	20.9823	22.3997	22.0983	21.7827	21.0064	21.7883	7	7	7	7	7	7	134.19	0	7.5571	86968000	20	21.2193	21.1095	21.0698	20.9404	20.9339	20.8519	NaN	20.8531	21.481	21.2941	20.7873	20.8608	21.0547	20.9098	NaN	22.2978	22.7407	22.1605	21.797	22.5781
Q61792;A2A6G6;A2A6G7;A2A6G8;A2A6G9;A2A6H0	LIM and SH3 domain protein 1	Lasp1	0.785402	1.39793	0.0400013	+	0.0248626	+	23.1238	23.1692	22.9793	23.2346	22.9513	22.0246	21.2158	22.5795	22.6966	23.0146	5	5	5	23.2	23.2	23.2	29.994	0	18.517	227440000	26	23.1368	23.0975	23.1371	23.3415	22.7372	23.4289	22.7263	23.0132	23.1985	23.2219	23.0998	23.3821	23.0675	22.8505	22.9358	22.5666	20.49	23.0173	22.5565	18.9189
E9Q696;P06240	Non-specific protein-tyrosine kinase;Proto-oncogene tyrosine-protein kinase LCK	Lck	0.801224	2.5373	0.002902	+	0.00441304	+	24.6864	24.7272	24.7191	24.5229	24.5665	24.4017	23.9516	23.33	23.9737	23.559	9	9	8	23.1	23.1	21.2	59.002	0	104.55	733450000	67	24.6158	24.5897	24.8538	25.1129	24.6438	24.425	24.6281	24.7963	24.7328	24.5507	24.633	24.3851	24.4974	24.5853	24.6168	22.8973	26.3308	23.9769	24.2038	22.7163
Q564E2;A0A1B0GSX0;P06151;A0A1B0GSR9;D3YZQ9;A0A1B0GT41;A0A1B0GQX5	L-lactate dehydrogenase;L-lactate dehydrogenase A chain	Ldha	-0.270074	4.0147	9.66709e-05	+	0.020262	+	29.7677	29.8114	29.6844	29.6813	29.7374	30.1137	29.9825	29.946	29.9858	30.0046	22	22	22	77.7	77.7	77.7	36.498	0	323.31	31137000000	398	29.7268	29.794	29.7821	29.7257	29.8688	29.8398	29.7492	29.6478	29.6564	29.6417	29.6304	29.772	29.813	29.705	29.6943	30.2234	30.0673	30.0505	30.0022	30.0016
Q8BGB5	LIM domain-containing protein 2	Limd2	0.903649	3.90203	0.000125306	+	0.000655738	+	22.7055	22.8763	22.7546	22.4164	22.7216	22.1655	21.8396	21.735	21.6976	21.5184	1	1	1	13.3	13.3	13.3	14.237	0	30.064	142090000	19	22.5176	22.7931	22.8058	22.9048	NaN	22.8479	22.7343	22.8637	22.6659	22.4365	22.2224	22.5904	22.7523	22.7968	22.6158	22.1169	22.2141	NaN	21.8708	22.0251
P14733	Lamin-B1	Lmnb1	0.696896	6.21317	6.1211e-07	+	0.00032	+	27.424	27.562	27.4385	27.3957	27.4165	26.7884	26.6063	26.7724	26.7425	26.8426	35	35	32	60.7	60.7	57	66.785	0	323.31	4466100000	246	27.5324	27.3954	27.3442	27.5125	27.5072	27.6664	27.4904	27.4972	27.3278	27.2928	27.3348	27.5594	27.4017	27.4329	27.4147	26.7503	26.911	26.7037	26.7651	26.4914
A0A0R4J0Q5;P21619;P21619-2	Lamin-B2	Lmnb2	0.656252	2.38788	0.00409376	+	0.00745902	+	21.2623	20.9086	21.3957	21.128	20.7257	20.8019	20.4008	20.207	20.1947	20.5347	8	5	5	13.5	9.9	9.9	69.084	0	5.403	56865000	14	21.2568	21.5907	20.9396	21.1985	20.6187	NaN	22.0592	21.2246	20.9032	21.1067	20.6034	21.674	21.1939	20.062	20.9211	20.9219	20.677	20.8069	20.494	20.4514
Q8C129	Leucyl-cystinyl aminopeptidase	Lnpep	0.579666	3.50767	0.000310695	+	0.00355263	+	24.1386	24.2621	23.9631	23.9853	24.0542	23.6454	23.6694	23.25	23.3978	23.5424	9	9	9	12.2	12.2	12.2	117.3	0	14.505	452530000	54	24.0732	24.1998	24.1427	24.3683	24.2859	24.132	24.0999	24.0125	23.7771	23.9691	23.8518	24.1351	23.9946	24.0707	24.0973	23.6992	23.7537	23.4833	23.6712	23.8219
Q99N69	Leupaxin	Lpxn	0.273454	2.4273	0.00373851	+	0.0414496	+	21.3635	21.3423	21.2479	21.1081	21.2138	20.9924	20.9727	21.1114	20.8081	21.0238	3	3	3	8.8	8.8	8.8	43.478	0	3.8414	77896000	29	21.3542	21.1892	21.5472	21.1567	21.5878	21.2824	21.1799	21.1853	21.3787	21.1262	20.9494	21.2488	21.2504	21.17	21.2208	20.3872	21.4648	21.1253	20.9589	21.321
Q922Q8	Leucine-rich repeat-containing protein 59	Lrrc59	-0.550532	1.4674	0.0340876	+	0.0326823	+	19.7328	19.697	19.3822	19.4362	19.4095	19.6552	19.5294	20.4849	20.353	20.3879	2	2	2	7.2	7.2	7.2	34.877	0.0014215	1.9361	18546000	4	NaN	NaN	19.7328	19.6148	19.7368	19.7393	19.3822	NaN	NaN	NaN	19.4362	NaN	19.4095	NaN	NaN	20.2545	18.3977	20.3135	NaN	NaN
O35900;O35901	U6 snRNA-associated Sm-like protein LSm2	Lsm2	0.344334	2.6053	0.00248139	+	0.022069	+	23.143	22.9876	23.0533	22.9464	23.175	22.8565	22.6822	22.5738	22.5842	22.8869	3	3	3	41.1	41.1	41.1	10.834	0	24	230610000	24	22.9486	23.0555	23.425	23.1739	22.9699	22.8189	23.0272	23.1326	23.0001	22.8042	23.1168	22.9182	23.1835	23.1184	23.2231	23.05	22.9349	22.5845	22.4207	22.7042
A2A6J7;P19973;A2A6J4;P19973-2	Lymphocyte-specific protein 1	Lsp1	2.00244	2.78541	0.00163903	+	0.00109091	+	25.9502	26.0215	25.4888	26.1973	24.5369	23.2713	23.1262	23.7407	24.8001	23.2441	7	7	7	31.5	31.5	31.5	35.928	0	323.31	1256800000	65	25.4967	26.0523	26.3015	25.6924	26.1192	26.253	25.7834	25.5777	25.1054	25.4482	25.7941	27.3495	25.6081	22.0683	25.9342	23.152	22.8166	23.8454	23.9508	21.4296
A0A087WNS9;A0A087WQ65;A0A087WRZ2;A0A087WNT2;A0A087WPY4;Q99JA5;Q64253	Lymphocyte antigen 6E	Ly6e	0.879475	4.07466	8.42054e-05	+	0.000561404	+	22.0351	22.0674	22.1596	21.8677	22.0795	21.3453	21.3656	20.7677	21.0839	21.2494	1	1	1	22.2	22.2	22.2	6.9541	0	38.904	108700000	11	22.1281	22.0202	21.9571	22.0303	21.9764	22.1954	22.3058	22.0065	22.1667	21.8699	21.7492	21.9839	22.3284	22.0284	21.8816	NaN	NaN	21.3453	21.2859	21.4549
E9PV93;Q01965;E9PX73	T-lymphocyte surface antigen Ly-9	Ly9	0.75414	2.1807	0.00659631	+	0.00777689	+	21.1214	21.1959	21.4221	21.8996	21.4539	20.4276	20.601	20.3113	21.2032	20.7792	4	4	4	6.4	6.4	6.4	71.116	0	16.947	71510000	12	21.641	20.4175	21.3057	21.3266	20.8019	21.4592	21.4326	21.2887	21.5451	22.1523	21.3765	22.17	21.5798	21.5385	21.2435	20.1799	19.424	21.679	20.6046	20.6549
P24668	Cation-dependent mannose-6-phosphate receptor	M6pr	0.462672	4.32987	4.67877e-05	+	0.00349686	+	22.5759	22.5739	22.6375	22.4411	22.5193	22.0888	21.9692	22.2346	21.9992	22.1426	3	3	3	15.5	15.5	15.5	31.172	0	45.104	184180000	30	22.3964	22.6537	22.6775	22.8193	22.3203	22.582	22.6451	22.613	22.6545	22.4333	22.4931	22.3968	22.7284	22.6258	22.2037	22.2565	22.2438	21.7661	21.9956	21.9534
O09159	Lysosomal alpha-mannosidase	Man2b1	0.570974	3.25829	0.000551715	+	0.00402286	+	22.4553	22.096	22.3538	22.1889	21.9594	21.6633	21.5051	21.535	21.7858	21.7095	6	6	6	8.1	8.1	8.1	114.65	0	12.511	128610000	51	22.3719	22.457	22.537	22.1753	21.8342	22.2786	22.2914	22.3186	22.4514	22.0376	22.1412	22.388	22.3021	22.4227	21.1533	21.6363	21.5018	21.8519	21.8403	21.2167
O54782	Epididymis-specific alpha-mannosidase	Man2b2	0.697636	2.90024	0.00125824	+	0.00375904	+	20.6219	20.3515	20.3371	20.6283	20.3968	20.0357	19.4551	20.0153	19.4737	19.8677	4	4	4	4.6	4.6	4.6	115.61	0	4.0227	36987000	10	20.5884	20.4327	20.8445	20.1244	20.3851	20.5451	20.213	20.1722	20.626	20.7338	20.107	21.044	20.6682	20.5544	19.9679	20.1938	20.0874	19.8258	19.0875	NaN
P31938	Dual specificity mitogen-activated protein kinase kinase 1	Map2k1	-0.569578	2.93166	0.00117042	+	0.00561576	+	20.7431	21.0325	20.8328	NaN	20.5547	21.4505	21.3207	21.5024	21.1758	21.3522	2	2	2	5.9	5.9	5.9	43.474	0	14.426	50567000	19	20.7431	NaN	NaN	20.9804	21.1525	20.9646	NaN	NaN	20.8328	NaN	NaN	NaN	NaN	20.7976	20.3117	21.4895	21.2897	21.5723	21.4795	21.4011
P63085	Mitogen-activated protein kinase 1	Mapk1	0.268752	2.43772	0.00364993	+	0.0434308	+	23.1335	22.8624	23.1068	22.9344	23.0438	22.8852	22.7648	22.6398	22.6868	22.7606	8	8	6	24.3	24.3	16.8	41.275	0	10.398	237060000	37	23.0859	23.4805	22.8341	23.1247	22.4167	23.0459	22.9507	23.1208	23.249	22.987	22.9042	22.9121	22.934	23.0537	23.1436	22.3395	23.4215	22.8945	22.8352	22.6864
E9QB02;Q68FL6	Methionine--tRNA ligase, cytoplasmic	Mars	-0.582516	1.89203	0.0128225	+	0.0166829	+	23.4763	22.7201	22.6338	22.7155	22.7038	23.6196	23.5788	23.4986	23.3575	23.1076	15	15	15	24.2	24.2	24.2	102.37	0	17.483	288840000	35	23.7735	23.1744	23.481	22.9101	22.8104	22.4398	22.7837	22.5064	22.6113	22.9758	22.8239	22.3469	22.4181	22.9985	22.6949	23.2967	23.5478	24.0143	23.3596	23.8655
Q3THS6;A0A0U1RNT6;A0A0U1RNK6;A0A0U1RQ95	S-adenosylmethionine synthase isoform type-2	Mat2a	-0.330598	2.2636	0.00545002	+	0.0309914	+	23.1501	23.2508	23.1866	23.5265	23.0812	23.6825	23.5118	23.5395	23.6522	23.4624	9	9	9	28.1	28.1	28.1	43.688	0	12.119	336930000	66	23.1611	22.9921	23.2971	23.2376	23.2504	23.2646	23.4357	22.9221	23.2021	23.488	23.3137	23.7779	23.276	22.9177	23.05	23.4741	23.6378	23.9355	23.645	23.5369
Q52KC3;P49718	DNA helicase;DNA replication licensing factor MCM5	Mcm5	-0.678884	3.56342	0.00027326	+	0.00241509	+	20.9721	20.5364	21.082	20.9882	20.9804	21.7735	21.4885	21.6095	21.4693	21.6127	4	4	4	7.4	7.4	7.4	82.406	0	4.5288	77407000	22	20.9887	20.9512	20.9764	19.454	21.0266	21.1284	21.1697	20.9973	21.0789	21.39	20.9291	20.6454	20.9445	21.0137	20.9829	21.7813	21.7826	21.7565	21.4522	21.4699
P08249	Malate dehydrogenase, mitochondrial	Mdh2	0.259293	3.99463	0.000101243	+	0.0231981	+	27.548	27.6933	27.683	27.6064	27.5583	27.2866	27.3917	27.354	27.359	27.4014	18	18	18	63.3	63.3	63.3	35.611	0	323.31	6099200000	363	27.601	27.5924	27.4507	27.7703	27.6779	27.6317	27.6404	27.682	27.7265	27.6121	27.5881	27.619	27.5178	27.5734	27.5838	27.2595	27.3795	27.2207	27.3304	27.4858
Q99KE1	NAD-dependent malic enzyme, mitochondrial	Me2	0.428086	2.72078	0.00190202	+	0.0129231	+	24.0099	24.2706	24.4556	24.0391	24.1263	23.5867	23.723	23.7899	23.837	23.8244	10	10	10	24.1	24.1	24.1	65.798	0	31.305	521090000	141	23.9855	23.9423	24.1019	24.2073	24.4025	24.2019	24.6245	24.3706	24.3718	24.1038	24.0259	23.9875	24.2005	24.101	24.0773	23.594	23.6744	23.4918	23.8237	23.6573
Q8CD15;D3YTU3	Bifunctional lysine-specific demethylase and histidyl-hydroxylase MINA	Mina	0.414315	1.97877	0.010501	+	0.0262407	+	21.8334	21.9768	22.257	21.8895	22.0367	21.5755	21.7743	21.7494	21.2115	21.6112	4	4	4	8.8	8.8	8.8	53.516	0	3.8243	112860000	20	22.0649	21.9419	21.4935	22.2268	22.0445	21.6592	22.2135	22.5046	22.0529	21.6946	21.9791	21.9947	21.9595	22.0471	22.1034	21.0004	21.9108	21.8152	21.479	21.9002
Q9EQI8	39S ribosomal protein L46, mitochondrial	Mrpl46	0.316875	2.24406	0.00570089	+	0.0346276	+	19.5135	19.3769	19.2469	19.0541	19.3221	18.8639	19.0124	18.9805	19.0979	18.9745	2	2	2	8.1	8.1	8.1	32.131	0.0014514	2.0417	14073000	2	19.2109	19.2655	20.0642	19.3599	19.3598	19.4109	NaN	NaN	19.2469	19.2881	18.2507	19.6235	19.273	19.3303	19.3631	18.8667	NaN	18.8611	NaN	19.1267
A2AMV1;Q9D0I8	mRNA turnover protein 4 homolog	Mrto4	-0.500775	2.10624	0.00783003	+	0.0164578	+	19.8917	19.7515	19.5373	19.8808	19.688	20.0416	20.706	20.1876	20.3113	20.0067	2	2	2	8.4	8.4	8.4	27.417	0	2.4085	29638000	4	20.1671	19.9823	19.5258	19.3252	19.8848	20.0445	19.3006	19.6219	19.6896	NaN	19.8182	19.9433	19.688	NaN	NaN	20.1993	19.7305	20.195	20.5444	20.4939
B1AT10;Q920Q6-3;Q920Q6-2;Q920Q6;B1AT13	RNA-binding protein Musashi homolog 2	Msi2	0.347246	3.01872	0.000957806	+	0.0166848	+	21.0519	21.1091	21.0123	20.8855	20.9396	20.4435	20.7503	20.6933	20.7363	20.6388	2	2	2	24.8	24.8	24.8	12.821	0.0014316	1.979	51370000	3	21.0856	21.0497	21.0206	20.9148	21.1563	21.2561	20.9893	21.1846	20.8629	20.97	20.801	NaN	20.931	20.8435	21.0443	20.3401	20.3743	20.6162	20.6261	21.0338
Q3V3R1	Monofunctional C1-tetrahydrofolate synthase, mitochondrial	Mthfd1l	0.325694	2.12386	0.00751863	+	0.0359671	+	25.3146	25.3381	25.4362	25.4168	25.2969	24.7036	25.0291	25.1103	25.2058	25.1254	16	16	16	20.4	20.4	20.4	105.73	0	73.251	1175100000	133	25.2094	25.3469	25.3876	25.3117	25.4664	25.2362	25.2776	25.4597	25.5714	25.3174	25.3982	25.5347	25.2918	25.2243	25.3746	24.8087	24.5242	24.7779	25.0717	25.1524
Q7TPV4	Myb-binding protein 1A	Mybbp1a	-0.691399	3.75433	0.000176064	+	0.00164444	+	23.0733	23.5146	23.1369	23.1091	23.1438	24.0792	23.9696	23.8611	23.6726	23.8522	15	15	15	13.4	13.4	13.4	152.04	0	18.57	387540000	68	23.2526	22.8415	23.1257	23.3054	23.8967	23.3418	22.9802	23.161	23.2694	23.0344	23.2279	23.0651	23.5066	22.6456	23.2792	24.2189	23.9522	24.0664	23.9767	23.8579
A0A1W2P6F6;A0A1W2P7Q9;Q60605-2;Q60605;A0A1W2P6G5	Myosin light polypeptide 6	Myl6	0.757069	4.76024	1.73683e-05	+	0.000627451	+	26.3814	26.1606	26.3937	26.2769	26.3612	25.5534	25.4961	25.7263	25.3281	25.6845	8	8	8	56.6	56.6	56.6	17.005	0	323.31	2083900000	77	26.327	26.2345	26.5826	26.0147	26.1787	26.2885	26.291	26.5634	26.3265	26.1715	26.1194	26.5398	26.2733	26.3689	26.4414	25.7577	24.8139	26.0886	25.6107	25.9166
Q5SUA5	Unconventional myosin-Ig	Myo1g	0.617503	5.8386	1.45011e-06	+	0.000653061	+	25.511	25.5272	25.3502	25.4363	25.4315	24.9473	24.8872	24.7427	24.7773	24.8142	24	24	24	30.5	30.5	30.5	117.23	0	53.564	1156000000	166	25.5364	25.5413	25.4554	25.7084	25.5452	25.3281	25.2656	25.358	25.4269	25.3938	25.3684	25.5466	25.4973	25.4023	25.395	24.9042	25.0416	24.8962	25.1636	24.801
Q99KQ4	Nicotinamide phosphoribosyltransferase	Nampt	-0.560338	3.97292	0.000106433	+	0.00263248	+	20.4941	20.559	20.5861	20.3373	20.5399	21.0883	21.2954	20.9505	21.0618	20.9222	3	3	3	10	10	10	55.446	0	3.5759	55341000	5	20.5258	20.2173	20.7392	20.7479	20.4781	20.4511	20.9094	20.2421	20.6068	20.2266	20.2424	20.543	20.9011	20.3776	20.341	20.872	21.4124	20.9806	21.63	21.0174
Q8BP47	Asparagine--tRNA ligase, cytoplasmic	Nars	-0.730564	3.48925	0.000324151	+	0.00191667	+	23.539	23.3639	23.4577	23.2649	22.914	24.1494	24.1081	23.9458	24.1192	23.8698	10	10	10	19.3	19.3	19.3	64.279	0	13.281	423160000	57	23.5878	23.6912	23.3381	23.3291	23.4579	23.3047	23.4619	23.4202	23.4911	23.2581	23.3627	23.174	22.147	23.3392	23.2558	24.1737	23.9955	24.2791	24.063	24.2171
P09405	Nucleolin	Ncl	-0.307011	3.51188	0.000307698	+	0.0175573	+	28.3552	28.4177	28.22	28.187	28.3117	28.7104	28.5731	28.549	28.5934	28.6008	22	22	22	31.4	31.4	31.4	76.722	0	323.31	11340000000	405	28.3826	28.3604	28.3227	28.3343	28.4626	28.4561	28.1486	28.2658	28.2457	28.1098	28.1916	28.2596	28.1825	28.3829	28.3697	28.6724	28.7679	28.6908	28.6174	28.5806
Q62433;F6VLR8;E9Q514;E9Q5I8;E9Q3F9;E9PVF3	Protein NDRG1	Ndrg1	-0.533109	3.77239	0.000168893	+	0.00350649	+	21.0305	20.9113	20.8923	20.7593	21.1473	21.2965	21.5026	21.5214	21.5446	21.5412	2	2	2	8.1	8.1	8.1	43.008	0	3.0782	73493000	12	21.0305	NaN	NaN	21.007	20.9749	20.752	20.804	20.9311	20.9417	20.8781	20.4844	20.9155	21.0983	21.1835	21.1602	21.4797	21.2523	21.1576	21.462	21.5222
Q99LC3	NADH dehydrogenase [ubiquinone] 1 alpha subcomplex subunit 10, mitochondrial	Ndufa10	0.692975	3.58552	0.000259703	+	0.00229703	+	21.111	21.4145	21.3926	21.5755	21.2501	20.8554	20.5197	20.5978	20.4737	20.8322	3	3	3	8.5	8.5	8.5	40.603	0	3.3567	65390000	18	20.8784	21.0829	21.3717	21.5075	21.3585	21.3775	21.485	21.3678	21.3249	21.3673	21.6719	21.6874	21.3098	21.1627	21.2779	20.896	20.8606	20.8096	20.9053	20.3348
Q9DCJ5	NADH dehydrogenase [ubiquinone] 1 alpha subcomplex subunit 8	Ndufa8	1.26495	2.40577	0.00392857	+	0.00313433	+	21.2148	21.9637	20.7948	21.8886	21.4915	20.1473	19.9258	20.9966	19.6287	20.3305	3	3	3	18.6	18.6	18.6	19.992	0	3.4143	62266000	24	21.1015	20.8956	21.6474	NaN	22.7867	21.1408	20.8497	21.119	20.4158	21.1882	23.3457	21.132	21.7448	21.2382	NaN	19.5735	21.2292	19.6391	19.5788	20.0026
A0A0R3P9C8;Q9DC69	NADH dehydrogenase [ubiquinone] 1 alpha subcomplex subunit 9, mitochondrial	Ndufa9	0.603393	1.96764	0.0107735	+	0.0144696	+	18.869	18.4277	18.8216	18.6898	18.8495	18.0815	17.7338	18.3034	18.6533	17.8686	2	2	2	7	7	7	42.121	0.00073638	2.118	11167000	2	17.7026	18.3621	20.5422	18.6987	18.6953	17.8889	18.922	18.7579	18.7847	18.9087	18.8882	18.2726	18.7371	18.8246	18.9868	NaN	18.0519	18.1111	17.2226	17.401
D3YUK4;Q9DCS9	NADH dehydrogenase [ubiquinone] 1 beta subcomplex subunit 10	Ndufb10	0.623002	2.00799	0.0098176	+	0.0129693	+	NaN	20.0784	20.2331	20.2527	20.2409	19.0178	19.8114	19.4924	19.7233	19.8466	2	2	2	17.4	17.4	17.4	17.74	0	2.2303	23987000	10	NaN	NaN	NaN	20.2056	19.5972	20.4325	19.9229	NaN	20.5434	20.0018	20.6968	20.0596	20.1834	20.4345	20.1047	NaN	19.0178	NaN	19.8562	20.1214
Q91VD9	NADH-ubiquinone oxidoreductase 75 kDa subunit, mitochondrial	Ndufs1	0.594357	2.53381	0.00292546	+	0.00767611	+	21.4586	21.1202	21.703	21.5723	21.3359	20.8059	20.9977	20.4917	21.0621	20.8608	6	6	6	8.1	8.1	8.1	79.776	0	5.9249	77578000	30	21.1661	21.8226	21.3869	20.2229	21.6545	21.4831	21.834	21.9142	21.3608	21.6123	21.4636	21.641	22.3228	20.2418	21.443	20.5237	21.3178	20.5761	20.8375	21.0263
Q9DCT2	NADH dehydrogenase [ubiquinone] iron-sulfur protein 3, mitochondrial	Ndufs3	0.867041	2.93776	0.0011541	+	0.00267826	+	19.7635	19.7484	19.9658	20.4359	19.628	18.6471	19.2095	19.1045	19.0457	19.1995	2	2	2	10.6	10.6	10.6	30.149	0	2.4874	21575000	9	19.5501	20.2332	19.5072	19.6811	19.7967	19.7673	20.0332	20.2275	19.6365	20.2091	20.6196	20.4789	NaN	19.5287	19.7274	19.0211	18.4103	18.5099	19.1482	19.4292
B1ARW4;Q99LY9	NADH dehydrogenase [ubiquinone] iron-sulfur protein 5;NADH dehydrogenase [ubiquinone] iron-sulfur protein 5, N-terminally processed	Ndufs5	0.788439	3.11356	0.000769905	+	0.00263158	+	20.9529	20.5614	20.3827	20.5321	20.5192	19.4198	19.7113	20.0242	20.0526	19.7982	1	1	1	13.2	13.2	13.2	10.909	0	6.1454	36017000	22	20.8625	NaN	21.0434	20.3781	20.414	20.8919	20.3243	20.0106	20.8132	20.7031	20.3922	20.5011	20.2278	20.6672	20.6627	19.9378	19.3898	18.9319	19.7247	20.0903
Q9DC70	NADH dehydrogenase [ubiquinone] iron-sulfur protein 7, mitochondrial	Ndufs7	0.407824	3.11437	0.000768476	+	0.0112517	+	19.5504	19.8568	19.8885	19.7475	19.557	19.3196	19.2799	19.3633	19.3802	19.2181	2	2	2	16.5	16.5	16.5	24.683	0	2.4827	24823000	14	19.6433	19.4705	19.5374	19.7759	20.153	19.6416	19.6416	20.1201	19.9039	19.5897	19.864	19.7887	19.7145	19.542	19.4144	19.7243	19.1207	19.1138	19.2822	19.2797
A0A286YCI0;Q9JI78;A0A286YCZ7	Peptide-N(4)-(N-acetyl-beta-glucosaminyl)asparagine amidase	Ngly1	0.630076	2.66398	0.00216778	+	0.00597129	+	20.1605	20.261	20.3478	20.6405	20.1549	NaN	19.6109	19.4629	19.9339	19.7237	3	3	3	7	7	7	68.133	0	3.4499	20729000	7	19.9654	20.3556	NaN	20.325	20.3289	20.1289	NaN	20.3381	20.3575	NaN	20.4475	20.8334	20.3062	20.0036	NaN	NaN	NaN	NaN	NaN	20.1358
O70310	Glycylpeptide N-tetradecanoyltransferase 1	Nmt1	-0.519442	4.51265	3.07147e-05	+	0.00237037	+	20.7854	20.8869	20.8361	20.6056	20.6876	21.3607	21.2724	21.2408	21.1726	21.3524	2	2	2	5.6	5.6	5.6	56.888	0	3.8202	64997000	30	20.4273	20.9561	20.973	20.8363	20.8755	20.949	20.9706	20.8964	20.6413	20.9646	20.1811	20.6712	20.65	20.746	20.6667	21.2729	21.3316	21.4775	21.2098	21.157
Q99K48	Non-POU domain-containing octamer-binding protein	Nono	0.763204	3.75925	0.00017408	+	0.00148718	+	25.3364	25.4408	25.326	25.7085	25.7011	24.7831	24.5207	24.8827	24.5903	24.92	15	15	14	52.6	52.6	51	54.54	0	270.05	1199000000	92	25.4356	25.4507	25.1227	25.2288	25.403	25.6905	25.37	25.1559	25.4522	25.7824	25.7379	25.605	25.6949	25.7825	25.626	25.059	24.5908	24.6994	24.7774	24.5539
Q9D6Z1	Nucleolar protein 56	Nop56	-1.16021	4.97085	1.06941e-05	+	0	+	20.5012	20.4937	20.3602	20.5339	20.4732	21.999	21.7057	21.4055	21.6925	21.3606	7	7	7	14.7	14.7	14.7	64.464	0	6.7427	73134000	27	20.6709	20.3907	20.4419	20.1413	20.6215	20.7184	20.8198	19.9006	NaN	20.6123	20.413	20.5763	20.6449	21.1428	19.6319	21.8188	21.9377	22.2406	22.2123	21.5775
A0A0A0MQ76;Q6DFW4;A0A087WSU5;A0A087WSL8	Nucleolar protein 58	Nop58	-0.340816	1.77271	0.0168767	+	0.0452075	+	21.9354	22.0629	21.6695	21.8341	22.1043	22.5043	22.2439	22.022	22.3574	22.1826	5	5	5	12.8	12.8	12.8	50.063	0	4.9443	136250000	28	21.9391	21.7913	22.0758	21.8956	22.0975	22.1957	21.6248	21.626	21.7578	21.8674	21.7436	21.8912	21.9808	22.1518	22.1803	22.4074	22.3976	22.7081	22.3493	22.1318
Q9CPP0	Nucleoplasmin-3	Npm3	0.781672	1.81537	0.0152978	+	0.0129907	+	23.8968	23.5486	23.4351	24.0863	23.7458	22.7406	23.1516	22.2689	23.6351	23.0081	2	2	2	25.7	25.7	25.7	19.023	0	162.03	258290000	7	NaN	23.9198	23.8739	23.2083	23.8889	NaN	23.2409	NaN	23.6292	NaN	25.4978	22.6748	23.8204	NaN	23.6712	23.2472	22.1817	22.7929	22.0576	23.6977
P46460	Vesicle-fusing ATPase	Nsf	0.336686	4.08911	8.14501e-05	+	0.0111918	+	22.2924	22.4242	22.2585	22.2614	22.2365	22.05	22.0033	21.9464	21.8725	21.9174	9	9	9	14.5	14.5	14.5	82.613	0	10.965	139470000	42	22.1041	22.3746	22.3984	22.4217	22.4345	22.4164	22.0498	22.373	22.3529	22.2979	22.4042	22.0822	22.2283	22.0367	22.4445	21.6393	22.3398	22.1708	21.9708	21.8304
Q1HFZ0-2;Q1HFZ0;H3BKN0	tRNA (cytosine(34)-C(5))-methyltransferase	Nsun2	-0.736631	5.27715	5.28262e-06	+	0.000631579	+	22.3005	22.3991	22.3285	22.5304	22.4215	23.325	23.179	22.9969	23.0944	23.068	10	10	10	17.1	17.1	17.1	77.746	0	10.699	218470000	39	22.3697	22.2028	22.329	22.3401	22.4422	22.4149	22.6258	22.3648	21.9948	22.3777	22.4559	22.7577	22.569	22.3869	22.3085	23.2855	23.2956	23.3939	23.2637	23.0462
Q9JKX6;A0A0A6YVU1;A2ATT5	ADP-sugar pyrophosphatase	Nudt5	-0.403917	2.07035	0.00850458	+	0.0248889	+	22.1429	22.1036	21.9238	22.0021	22.0503	22.8354	22.3521	22.4743	22.1629	22.4175	3	3	3	16.1	16.1	16.1	23.984	0	5.047	157120000	30	21.961	22.3313	22.1364	22.144	22.2227	21.9441	21.7173	21.8838	22.1704	22.0558	21.9332	22.0174	22.123	22.0659	21.9619	22.8111	22.8755	22.8197	22.6383	22.349
Q9JIH2	Nuclear pore complex protein Nup50	Nup50	0.294754	2.56061	0.00275038	+	0.0326809	+	21.4639	21.2842	21.225	21.4646	21.4902	20.9974	21.0226	21.1525	21.0571	21.2246	4	4	4	13.1	13.1	13.1	49.485	0	5.1414	75048000	12	21.2457	21.698	21.4481	21.2103	21.1415	21.5009	21.3125	21.0837	21.2787	21.6554	21.3975	21.3408	21.5353	21.4487	21.4867	20.9441	21.2484	20.7997	21.0165	21.0564
Q60597;Z4YJV4;Q60597-2;Q60597-4;Q60597-3	2-oxoglutarate dehydrogenase, mitochondrial	Ogdh	0.446127	3.1384	0.000727114	+	0.00786364	+	20.6701	20.7908	20.7676	20.8878	20.8195	20.1305	20.3923	20.4526	20.532	20.1979	4	4	4	5.5	5.5	5.5	116.45	0	3.3892	44192000	5	20.8508	20.7788	20.3809	20.8178	20.7527	20.8018	20.627	20.7567	20.919	20.8092	NaN	20.9665	21.2558	20.3302	20.8725	20.2334	20.1178	20.0402	20.3792	20.359
Q9CZ30	Obg-like ATPase 1	Ola1	-0.542228	1.96101	0.0109394	+	0.0171105	+	21.088	20.1829	20.4308	20.4705	20.709	21.0519	21.3377	21.1388	21.0918	20.9721	3	3	3	10.9	10.9	10.9	44.729	0	5.9616	57329000	24	20.988	21.0064	21.2695	20.1038	20.0136	20.4312	20.1209	20.5579	20.6138	20.7024	20.5022	20.2069	20.6048	20.7596	20.7627	21.103	21.0295	21.0232	21.294	21.383
F8WH20;D3Z194;D3YTT6;Q9DBS9;D3YVF7	Oxysterol-binding protein;Oxysterol-binding protein-related protein 3	Osbpl3	0.976595	3.89868	0.000126276	+	0.000592593	+	19.5824	19.8307	19.7194	19.7957	19.9003	NaN	19.0199	18.7084	18.639	NaN	2	2	2	2.9	2.9	2.9	93.02	0.001442	2.0012	11335000	8	19.5637	NaN	19.6011	NaN	NaN	19.8307	19.6349	NaN	19.8038	19.7414	19.8501	NaN	NaN	19.9951	19.8055	NaN	NaN	NaN	19.1494	NaN
Q3TGU7;P50580;P50580-2	Proliferation-associated protein 2G4	Pa2g4	-0.527893	3.92715	0.000118264	+	0.00338889	+	25.2503	25.3364	24.9906	25.1656	25.376	25.8608	25.7632	25.6908	25.68	25.7636	11	11	11	34	34	34	43.698	0	237.59	1462700000	85	25.0195	25.361	25.3704	25.2493	25.4811	25.2788	25.4114	24.3026	25.2576	25.0245	25.0794	25.3929	25.4629	25.3956	25.2694	26.0571	25.7676	25.7575	25.8194	25.698
P29341	Polyadenylate-binding protein 1	Pabpc1	-0.630957	3.10729	0.000781108	+	0.00373653	+	25.032	25.3299	25.182	25.2179	25.1419	26.2122	25.7332	25.5528	25.7216	25.8388	17	17	11	29.9	29.9	18.2	70.67	0	146.44	1464200000	80	25.1421	25.253	24.701	25.3424	25.2314	25.416	25.2109	25.2244	25.1107	25.4201	24.9851	25.2485	25.1573	25.2107	25.0575	26.207	26.3816	26.0481	25.755	25.7508
Q8K2T8	RNA polymerase II-associated factor 1 homolog	Paf1	0.435557	1.95972	0.0109719	+	0.02442	+	18.8641	19.1757	19.1085	19.1356	19.095	19.1137	18.5159	18.5219	18.5947	18.4549	3	3	3	6.7	6.7	6.7	60.518	0	3.1251	12070000	12	NaN	19.169	18.5591	19.2654	19.4005	18.861	18.875	19.0608	19.3899	19.2285	18.8214	19.3569	18.6236	19.179	19.4825	18.705	19.5224	NaN	18.774	18.2578
Q99LX0;A2A813;A2A815	Protein deglycase DJ-1	Park7	-0.476173	2.28425	0.00519701	+	0.0150682	+	24.9117	24.8733	24.6722	24.9413	24.9239	25.0461	25.7411	25.3009	25.2251	25.3901	9	9	9	68.8	68.8	68.8	20.021	0	323.31	1160200000	83	24.9478	25.1327	24.6545	25.0001	24.8327	24.7872	25.163	24.3629	24.4909	24.9423	24.8917	24.99	25.0089	24.6771	25.0856	24.9847	25.1222	25.0313	25.487	26.2591
A0A140T8V5;P17918	Proliferating cell nuclear antigen	Pcna	0.381987	2.94958	0.00112311	+	0.0138872	+	26.5353	26.7368	26.6787	26.6561	26.5204	26.4898	26.2479	26.1926	26.1612	26.1259	12	12	12	38.3	38.3	38.3	28.785	0	323.31	2740400000	101	26.5786	26.5541	26.4733	26.6721	26.7993	26.7389	26.6356	26.7674	26.633	26.6339	26.5401	26.7944	26.5057	26.5498	26.5057	26.5151	26.455	26.4992	26.2944	26.2088
G5E8R3;E9QPD7;Q05920	Pyruvate carboxylase;Pyruvate carboxylase, mitochondrial	Pcx;Pc	-0.953292	3.16534	0.000683369	+	0.00172093	+	18.8715	18.6919	18.9574	18.8061	18.5886	19.292	19.488	20.092	20.1363	19.6737	3	3	3	3	3	3	129.7	0	3.3572	18908000	7	18.7156	18.7597	19.1392	18.4412	18.9469	18.6877	NaN	18.8029	19.112	18.8192	18.8849	18.7141	NaN	18.6997	18.4774	19.426	18.4436	20.0065	19.2528	19.625
Q3UHX2	28 kDa heat- and acid-stable phosphoprotein	Pdap1	-0.32644	2.32493	0.00473229	+	0.0305733	+	21.0507	21.4114	21.2421	21.0226	20.9689	21.529	21.4283	21.4298	21.4568	21.4839	3	3	3	24.9	24.9	24.9	20.605	0	2.8739	73237000	6	21.1276	20.83	21.1944	21.5022	21.3451	21.3868	21.2234	21.1935	21.3094	21.3074	20.7202	21.0402	21.1167	20.8211	NaN	NaN	21.4639	21.594	21.3414	21.3827
Q61823	Programmed cell death protein 4	Pdcd4	1.60167	4.04509	9.01383e-05	+	0	+	22.6952	22.154	21.9034	22.5755	22.6461	21.2779	20.4151	20.6099	20.6281	21.0347	8	8	8	23.7	23.7	23.7	51.702	0	18.136	122120000	24	22.5824	22.5724	22.9307	21.9628	21.7571	22.7421	21.9192	21.9299	21.8609	22.7268	22.6842	22.3154	22.8872	22.5434	22.5076	20.5798	21.4469	21.8072	20.0013	20.8318
P35486	Pyruvate dehydrogenase E1 component subunit alpha, somatic form, mitochondrial	Pdha1	0.356599	3.09682	0.000800157	+	0.0149943	+	21.4715	21.3789	21.3335	21.4132	21.1802	20.8647	20.9162	21.0411	21.1239	21.0483	3	3	3	11.3	11.3	11.3	43.231	0	3.0619	68769000	14	21.4227	21.5956	21.3961	21.4291	21.4696	21.2381	21.3253	NaN	21.3416	21.448	21.4283	21.3634	21.2126	21.153	21.175	20.9256	NaN	20.8038	21.2738	20.7337
Q8BFP9	[Pyruvate dehydrogenase (acetyl-transferring)] kinase isozyme 1, mitochondrial	Pdk1	0.590337	2.43491	0.00367355	+	0.00861423	+	20.9876	20.6573	20.6735	20.5939	20.618	19.8642	20.5541	20.1668	20.1293	19.8642	3	3	3	8.5	8.5	8.5	48.994	0	2.7955	43460000	11	20.9232	20.7656	21.2739	20.6821	20.8521	20.4379	20.6184	20.8064	20.5959	21.2139	20.7546	19.8132	20.5797	20.4568	20.8175	19.9886	19.7537	19.8505	20.7126	NaN
Q922H2	[Pyruvate dehydrogenase (acetyl-transferring)] kinase isozyme 3, mitochondrial	Pdk3	0.459602	2.35827	0.00438254	+	0.0150655	+	20.3845	20.4995	20.2437	20.1098	20.1629	19.4631	19.9498	19.8251	19.9041	19.9603	1	1	1	3.6	3.6	3.6	47.922	0	4.5096	21491000	11	20.2901	20.3551	20.5082	20.4995	NaN	NaN	20.3173	20.1701	NaN	20.1244	20.1348	20.0703	NaN	20.1629	NaN	19.1811	NaN	19.7451	20.1791	19.7774
P12382	ATP-dependent 6-phosphofructokinase, liver type	Pfkl	-0.344668	2.32528	0.00472844	+	0.0277248	+	23.519	23.4266	23.3265	23.382	23.3619	23.8442	23.8695	23.7956	23.8084	23.4216	14	12	12	25	21.4	21.4	85.359	0	13.618	376050000	53	23.506	23.5146	23.5364	23.4395	23.2191	23.6212	23.295	23.4057	23.2787	23.3717	23.1562	23.6181	23.3962	23.4268	23.2628	23.8359	23.8594	23.8374	23.9249	23.801
Q8C605;Q9WUA3;Q9WUA3-2	ATP-dependent 6-phosphofructokinase;ATP-dependent 6-phosphofructokinase, platelet type	Pfkp	-0.504513	5.16071	6.90695e-06	+	0.00166292	+	25.8333	25.64	25.6212	25.6264	25.6825	26.1532	26.2441	26.0966	26.2514	26.1808	21	21	14	38.5	38.5	30.5	85.546	0	323.31	1960100000	226	25.8762	25.8279	25.7959	25.6623	25.6276	25.6301	25.5602	25.5994	25.7041	25.6732	25.6301	25.576	25.6921	25.7817	25.5737	26.1138	26.1534	26.1924	26.0892	26.3239
Q9DBJ1	Phosphoglycerate mutase 1	Pgam1	-0.453335	3.41515	0.000384456	+	0.00684163	+	26.3199	26.5317	26.1401	26.4324	26.4826	26.8677	26.7334	26.7776	26.8847	26.9101	12	12	12	71.7	71.7	71.7	28.832	0	323.31	3410800000	136	26.4777	26.0665	26.4156	26.6267	26.5082	26.4603	26.354	25.6509	26.4153	26.3329	26.3242	26.6402	26.5025	26.4422	26.503	26.9282	26.8272	26.8476	26.8254	26.6699
P09411;S4R2M7	Phosphoglycerate kinase 1;Phosphoglycerate kinase	Pgk1	-0.231742	3.90308	0.000125002	+	0.0331163	+	29.3155	29.3205	29.1664	29.1834	29.2376	29.4777	29.4885	29.4879	29.4385	29.4894	21	21	21	67.6	67.6	67.6	44.55	0	323.31	21525000000	459	29.2779	29.3424	29.3262	29.2923	29.3123	29.3568	29.2541	29.082	29.1632	29.1603	29.2109	29.1789	29.208	29.2354	29.2693	29.6057	29.424	29.4035	29.4541	29.4788
Q9D0F9;A2CEK3	Phosphoglucomutase-1	Pgm1;Pgm2	-0.684723	3.12404	0.000751554	+	0.0033557	+	23.1891	23.636	23.714	23.4339	23.7399	24.4494	24.3842	24.07	24.1216	24.1113	13	13	13	33.5	33.5	33.5	61.417	0	20.059	479130000	64	23.9081	23.045	22.6143	23.489	23.6917	23.7273	23.7352	23.8306	23.5762	23.3222	23.3454	23.634	23.7754	23.6765	23.7678	24.3381	24.5459	24.4643	24.4668	24.3508
O35129;F6QPR1;F6Q8V7	Prohibitin-2	Phb2	-0.28229	2.21719	0.00606476	+	0.0451407	+	24.7245	24.6347	24.4468	24.5296	24.3732	24.9572	24.7015	24.8568	24.769	24.8358	10	10	10	45.8	45.8	45.8	33.296	0	323.31	827640000	97	24.6712	24.7018	24.8006	24.6361	24.8825	24.3853	24.4076	24.4611	24.4718	24.5648	24.5658	24.4581	24.5163	24.3132	24.2902	24.9269	24.9539	24.9907	24.7677	24.6277
Q61753	D-3-phosphoglycerate dehydrogenase	Phgdh	-0.411783	3.70454	0.000197451	+	0.00714163	+	26.6984	26.7815	26.6948	26.5033	26.5923	27.1925	27.103	27.0239	26.9402	27.0695	17	17	17	47.7	47.7	47.7	56.585	0	323.31	3802000000	196	26.563	26.7148	26.8174	26.7969	26.7506	26.797	26.7847	26.5969	26.7029	26.4963	26.4315	26.582	26.5395	26.6357	26.6016	27.3051	27.2546	27.0179	27.1233	27.0583
Q9QUR7;Q3ULQ2	Peptidyl-prolyl cis-trans isomerase NIMA-interacting 1	Pin1;Pin1rt1	-0.538061	1.75855	0.017436	+	0.0216634	+	NaN	19.1685	19.3385	19.4057	18.5833	19.5074	19.7	19.7973	19.7098	19.5959	2	2	2	10.9	10.9	10.9	18.37	0.0065359	1.626	15863000	3	NaN	NaN	NaN	19.1458	19.3469	19.0127	19.2341	19.4364	19.3449	19.3759	19.5153	19.326	19.0754	NaN	18.0911	18.7872	20.2275	NaN	19.5475	19.8934
P52480	Pyruvate kinase PKM	Pkm	-0.248282	3.57205	0.000267888	+	0.0305764	+	29.4014	29.3003	29.2319	29.2136	29.289	29.5615	29.5281	29.5693	29.4483	29.5706	36	36	5	74.8	74.8	9.4	57.844	0	323.31	22529000000	770	29.3463	29.4057	29.4521	29.2982	29.3031	29.2996	29.2222	29.2226	29.2511	29.1736	29.1889	29.2784	29.2812	29.2828	29.3032	29.5601	29.7528	29.3715	29.4725	29.5179
Q9QXS1-3;Q9QXS1-15;Q9QXS1-10;Q9QXS1-9;Q9QXS1-12;Q9QXS1-11;Q9QXS1-13;Q9QXS1-5;Q9QXS1-16;Q9QXS1-4;Q9QXS1-14;Q9QXS1-6;Q9QXS1-7;Q9QXS1-8;Q9QXS1-2;Q9QXS1;E9Q3W4	Plectin	Plec	0.352842	5.26543	5.42707e-06	+	0.00558824	+	25.8768	25.8287	25.7899	25.7247	25.7826	25.5293	25.4534	25.4207	25.4126	25.4224	73	73	73	21.3	21.3	21.3	517.28	0	95.496	1605700000	312	25.8629	25.8308	25.9369	25.8462	25.9141	25.7257	25.7838	25.8819	25.7039	25.6973	25.7281	25.7486	25.7762	25.8068	25.7647	25.4876	25.6779	25.4224	25.4144	25.4801
Q9DC61;A2AIW9	Mitochondrial-processing peptidase subunit alpha	Pmpca	0.568596	1.56907	0.0269733	+	0.0270855	+	20.0034	19.9789	20.2035	20.4618	20.1047	19.7763	19.74	18.8182	19.7559	19.8189	2	2	2	3.2	3.2	3.2	58.278	0.0077519	1.5625	29901000	8	19.6518	20.4003	19.9582	20.0402	19.9176	NaN	20.0335	20.5679	20.0091	20.7169	20.3231	20.3453	20.5875	19.8139	19.9127	19.5382	19.7738	20.017	19.8148	19.6699
A0A0J9YVJ6;G5E8N7;Q9JLV6;E9Q9A5;Q9JLV6-2	Bifunctional polynucleotide phosphatase/kinase;Polynucleotide 3-phosphatase;Polynucleotide 5-hydroxyl-kinase	Pnkp	0.359553	2.37359	0.00423063	+	0.0239522	+	19.7814	20.0567	19.6865	20.0139	19.6184	19.4754	19.3917	19.5442	19.4515	19.4962	3	3	3	8.9	8.9	8.9	46.153	0	8.0452	23807000	10	20.316	19.7375	19.2906	19.7184	20.3882	20.0637	19.4244	19.5457	20.0894	19.8266	20.2461	19.9689	19.1725	19.8078	19.8748	NaN	19.4754	NaN	19.4133	19.6093
Q8CFI7	DNA-directed RNA polymerase II subunit RPB2	Polr2b	0.38918	3.18536	0.00065259	+	0.0120792	+	19.7785	19.6483	19.8413	19.8698	19.6581	19.4321	19.3192	19.1758	19.4346	19.4884	3	3	3	3	3	3	133.91	0	2.7197	22802000	7	19.8069	19.7239	19.8046	19.498	19.6532	19.7937	19.9604	NaN	19.7223	19.7254	19.8612	20.0227	19.6535	19.6798	19.6412	18.7598	19.5306	20.0061	19.3333	19.0367
A0A1D5RML8;P97760;A0A1D5RLM9	DNA-directed RNA polymerase II subunit RPB3	Polr2c	0.693268	2.34209	0.00454898	+	0.0070678	+	20.0875	20.2977	20.6244	20.1957	20.431	19.8392	19.8342	19.2024	NaN	19.6601	2	2	2	6.6	6.6	6.6	48.359	0.0034083	1.7663	21077000	4	20.2826	NaN	19.8924	20.2977	NaN	NaN	NaN	NaN	20.6244	20.0228	19.8948	20.6695	20.6842	20.2984	20.3104	19.1179	19.9379	20.4619	NaN	NaN
Q80UW8	DNA-directed RNA polymerases I, II, and III subunit RPABC1	Polr2e	0.980915	1.88322	0.0130852	+	0.00868657	+	21.3815	21.4864	21.5604	21.6488	21.2276	20.5125	19.4025	21.0566	20.3999	21.0285	2	2	2	11	11	11	24.57	0	2.7909	65839000	30	21.2822	21.4181	21.4441	21.4647	21.508	NaN	22.3203	21.2071	21.1538	21.9351	21.3138	21.6976	21.2333	21.1167	21.3326	21.2863	19.7386	NaN	21.0823	NaN
P62488	DNA-directed RNA polymerase II subunit RPB7	Polr2g	0.416134	1.42365	0.0377011	+	0.0497647	+	20.6935	20.8534	NaN	20.6709	20.6039	20.456	19.74	20.416	20.412	20.4223	2	2	2	13.4	13.4	13.4	19.294	0.00073099	2.0756	34357000	6	20.7672	20.7359	20.5775	20.6706	21.0063	20.8832	NaN	NaN	NaN	20.7732	20.4052	20.8341	20.6445	NaN	20.5634	20.4479	20.4662	20.4539	20.3875	18.2078
Q8BVQ5	Protein phosphatase methylesterase 1	Ppme1	-0.477554	1.69131	0.0203557	+	0.0293333	+	21.0973	20.5127	20.7598	20.352	20.5358	21.11	21.4579	21.1968	20.8161	21.0647	3	3	3	9.1	9.1	9.1	42.256	0	4.7924	61258000	20	21.1507	21.2045	20.9368	20.8772	20.4084	20.2526	20.7573	20.7071	20.815	20.6658	20.7115	19.6788	20.566	20.6643	20.3772	21.1453	21.148	21.0367	21.5115	21.5987
Q9DBR7-2;Q9DBR7	Protein phosphatase 1 regulatory subunit 12A	Ppp1r12a	0.638042	3.37005	0.000426526	+	0.00338235	+	21.4297	21.158	21.5819	21.233	21.0703	20.8538	20.6486	20.6477	20.4743	20.6584	4	4	4	5.1	5.1	5.1	111.81	0	4.3058	61308000	13	22.015	21.1782	21.096	21.3447	20.9679	21.1615	22.1897	20.9741	NaN	21.4915	20.8885	21.3189	21.9528	20.1814	21.0767	20.915	20.8676	20.7786	20.7367	20.5606
Q6P1F6;Q9CWU3;F6RV17;Q925E7	Serine/threonine-protein phosphatase 2A 55 kDa regulatory subunit B alpha isoform;Serine/threonine-protein phosphatase 2A 55 kDa regulatory subunit B;Serine/threonine-protein phosphatase 2A 55 kDa regulatory subunit B delta isoform	Ppp2r2a;Ppp2r2d	-0.423339	3.66052	0.000218512	+	0.00679111	+	21.3983	21.4307	21.4477	21.6642	21.3967	22.0027	21.9029	21.8516	21.747	21.9501	5	5	5	13.9	13.9	13.9	51.691	0	9.9856	104040000	48	21.3519	21.3634	21.4797	21.3741	21.3987	21.5193	21.4501	21.5418	21.3511	21.4862	21.8854	21.6211	21.3454	21.2871	21.5575	21.8345	22.14	22.0337	21.8657	22.0489
Q63810-2;Q63810	Calcineurin subunit B type 1	Ppp3r1	0.520391	1.54452	0.028542	+	0.0310216	+	20.9291	21.1702	20.9064	20.9569	20.8369	20.629	20.8158	20.0207	19.9566	20.7754	3	3	3	22.5	22.5	22.5	18.208	0	3.6314	54342000	12	20.9893	20.8103	20.9877	20.9501	21.3287	21.2319	20.9519	20.8211	20.9462	20.886	21.2823	20.7024	20.835	20.8958	20.7799	20.6985	20.5279	20.6605	21.1954	20.3998
B1B0P8;B1B0P9;O88531	Palmitoyl-protein thioesterase 1	Ppt1	0.63589	1.86053	0.013787	+	0.0152291	+	21.2643	21.0476	20.9259	20.3301	20.8257	20.5449	20.3349	20.331	19.7642	20.2392	1	1	1	10.1	10.1	10.1	19.55	0.0014276	1.9582	37494000	5	21.0888	21.2194	21.4846	20.9475	21.1476	NaN	NaN	20.9259	NaN	NaN	19.7679	20.8923	20.5385	NaN	21.1129	20.6533	NaN	20.4364	20.2252	NaN
A0A1B0GRU8;Q9R1C7-2;Q9R1C7	Pre-mRNA-processing factor 40 homolog A	Prpf40a	0.411539	1.63781	0.0230246	+	0.0385051	+	21.3858	21.2834	20.9515	21.6471	21.2509	20.797	21.0247	20.5789	20.9416	21.119	3	3	3	5.1	5.1	5.1	105.53	0	4.1236	71320000	10	21.2329	21.7346	21.19	21.2512	21.3156	NaN	20.774	20.957	21.1236	21.6743	21.6041	21.6631	21.2026	21.2284	21.3218	20.8427	20.8553	20.6929	20.8041	20.9324
Q61136;A0A1Y7VLT3	Serine/threonine-protein kinase PRP4 homolog	Prpf4b	0.735187	1.34948	0.0447222	+	0.0289571	+	20.6806	19.7116	NaN	20.2482	20.4854	18.9636	19.8584	19.7637	NaN	19.5993	2	2	2	3	3	3	116.97	0.00074571	2.1747	21479000	9	19.9876	21.0461	21.0082	19.3035	NaN	20.1197	NaN	NaN	NaN	NaN	20.4912	20.0051	20.7431	NaN	20.2276	18.3374	18.4554	20.0979	20.002	NaN
E9PZ00;Q8BFQ1;K3W4L3;J3QPG5;Q61207	Prosaposin	Psap	0.599316	2.62007	0.00239845	+	0.0069869	+	23.0257	23.4739	23.743	23.664	23.6453	23.0455	22.8433	22.9759	22.7767	22.914	6	6	6	13.1	13.1	13.1	60.672	0	7.2072	307120000	17	23.8771	23.9638	21.2361	23.944	22.4327	24.0451	23.5578	NaN	23.9281	23.7868	23.4661	23.7392	23.6229	23.693	23.6202	22.7663	23.2802	23.0901	22.9701	22.9394
Q99K85;Q3U6K9;E9Q6P1	Phosphoserine aminotransferase	Psat1	-0.68569	6.33242	4.65132e-07	+	0.000333333	+	24.4373	24.4399	24.3884	24.4447	24.4895	24.9999	25.266	25.0847	25.1633	25.1143	12	12	12	38.6	38.6	38.6	40.472	0	21.607	894690000	76	24.3361	24.5767	24.399	24.3719	24.5425	24.4054	24.4574	24.3671	24.3406	24.21	24.4116	24.7124	24.3594	24.7018	24.4072	25.1807	25.3104	24.5085	25.4662	25.1517
Q60692	Proteasome subunit beta type-6	Psmb6	-0.357178	1.96646	0.0108029	+	0.0347059	+	21.8428	22.0251	21.8447	21.5839	21.966	22.4272	22.1242	21.9728	22.2982	22.2262	3	3	3	13.9	13.9	13.9	25.378	0	3.4736	121200000	7	21.9123	21.863	21.7531	21.7283	22.0901	22.257	21.8603	21.9334	21.7405	21.5673	21.5574	21.6272	NaN	21.9018	22.0302	22.4534	22.4604	22.3677	22.2941	21.9779
A0A0R4J256;G3UYK5;P28076	Proteasome subunit beta type-9	Psmb9	0.385732	2.28407	0.00519915	+	0.0221217	+	21.6396	21.8144	21.8462	22.1609	21.7866	21.5607	21.5129	21.5318	21.2568	21.4568	3	3	3	11.9	11.9	11.9	23.325	0	7.0268	100600000	15	21.9751	21.4715	21.4723	21.7669	22.0516	21.6247	21.9342	21.9771	21.6273	22.3458	21.9564	22.1803	21.9641	21.7797	21.616	21.5496	21.4325	21.7002	21.6531	21.354
P62334	26S protease regulatory subunit 10B	Psmc6	-0.373769	3.21362	0.000611475	+	0.0128025	+	23.1005	22.7861	22.9187	23.0601	23.0062	23.3601	23.3563	23.381	23.2018	23.4413	8	8	8	23.4	23.4	23.4	44.172	0	11.932	281950000	52	22.8591	23.1154	23.327	22.7203	23.0489	22.5893	22.9172	22.9955	22.8433	22.8467	23.3048	23.0289	23.0567	22.9925	22.9695	23.2584	23.4432	23.3788	23.4855	23.4022
P14685;F7B7L8	26S proteasome non-ATPase regulatory subunit 3	Psmd3	-0.598196	2.96682	0.00107939	+	0.00522105	+	21.9836	21.9642	22.0464	21.495	21.7882	22.6785	22.5002	22.2978	22.3424	22.4495	6	6	6	14.5	14.5	14.5	60.718	0	7.0261	147910000	44	21.9178	21.8823	22.1508	21.5485	22.3486	21.9955	22.2872	21.7008	22.1512	21.472	21.6024	21.4106	22.0152	21.4441	21.9052	22.5111	22.9037	22.6208	22.1925	22.1486
G3X9V0;P97372;E0CZ90	Proteasome activator complex subunit 2	Psme2	0.291635	2.20836	0.00618929	+	0.0418224	+	24.8947	25.1352	24.739	24.8799	24.8671	24.5872	24.7861	24.52	24.5546	24.6101	6	6	6	36.8	36.8	36.8	26.159	0	250.75	915440000	58	24.9842	24.842	24.8579	25.1957	24.9787	25.2312	24.67	24.6998	24.8474	25.2129	24.5848	24.8421	24.745	24.9424	24.914	24.2459	24.6375	24.8781	24.6385	24.7975
Q9EST4-3;Q9EST4	Proteasome assembly chaperone 2	Psmg2	-0.360287	1.80994	0.0154902	+	0.0390476	+	19.0223	19.0192	19.1764	18.9666	18.8257	19.7673	19.3369	19.2193	19.2425	19.2456	2	2	2	9.4	9.4	9.4	25.351	0.00074184	2.1531	15946000	7	19.0281	18.9775	19.0611	18.9738	NaN	19.0646	19.7557	NaN	18.5971	19.1572	18.7846	18.958	18.6597	NaN	18.9918	19.4486	20.3163	19.5371	19.3959	19.1762
S4R1M0;P06800-6;P06800-5;P06800	Protein-tyrosine-phosphatase;Receptor-type tyrosine-protein phosphatase C	Ptprc	0.867205	7.63009	2.34377e-08	+	0	+	27.4279	27.5185	27.4549	27.4291	27.4483	26.632	26.6977	26.4913	26.5954	26.5262	36	36	36	42	42	42	128.57	0	323.31	4435200000	221	27.3427	27.4825	27.4583	27.5833	27.4053	27.5669	27.3763	27.5035	27.485	27.4219	27.4244	27.4409	27.4557	27.3958	27.4934	26.5638	26.7409	26.5915	26.7326	26.6713
Q3UEB3-3;Q3UEB3-2;Q3UEB3	Poly(U)-binding-splicing factor PUF60	Puf60	0.621613	2.65769	0.00219944	+	0.00645581	+	24.1248	23.9768	24.145	24.1107	24.3631	23.7429	23.6243	23.0463	23.5018	23.6969	10	10	10	34.5	34.5	34.5	54.028	0	17.499	451530000	57	23.9644	24.199	24.211	24.0017	23.7754	24.1533	24.2011	24.2101	24.0237	24.1129	24.1588	24.0604	24.1472	24.431	24.5111	23.9711	23.4329	23.8247	23.4311	23.6669
Q9EPB4;A0A0U1RQ20	Apoptosis-associated speck-like protein containing a CARD	Pycard	0.713762	2.94053	0.00114674	+	0.003475	+	23.7886	23.3922	23.0277	23.6639	23.2984	22.9025	22.606	22.7117	22.6317	22.7501	7	7	7	57	57	57	21.458	0	21.455	289180000	45	23.8742	23.6561	23.8356	23.1683	23.5341	23.4741	22.9407	23.0307	23.1117	23.825	23.1999	23.9668	23.0146	23.4063	23.4743	22.991	22.6087	23.1077	22.2161	22.8107
Q922Q4	Pyrroline-5-carboxylate reductase 2	Pycr2	0.721735	2.34627	0.00450541	+	0.00686726	+	23.3963	23.0987	23.1681	23.4332	22.8894	22.1979	22.2489	22.3243	23.0442	22.5616	6	6	6	27.5	27.5	27.5	33.659	0	28.057	246890000	44	23.2971	23.2009	23.6909	23.214	22.8055	23.2765	23.0921	23.1425	23.2696	23.5859	23.3639	23.3498	23.2097	23.3712	22.0873	21.984	22.2354	22.3743	21.7256	22.7128
Q8BV49;A0A0A6YXV9	Pyrin and HIN domain-containing protein 1	Pyhin1	0.529284	2.56716	0.00270921	+	0.0100146	+	19.8331	19.4441	19.9805	20.1643	19.9129	19.3509	19.3535	19.3036	19.2359	19.4446	2	2	2	6.2	6.2	6.2	46.886	0.0014194	1.9265	23591000	2	19.9902	NaN	19.676	19.4609	20.0657	18.8058	20.0115	20.1009	19.8291	20.1433	20.2445	20.1051	20.0566	19.8648	19.8173	19.4465	19.3772	19.2291	19.2271	19.3985
D3Z158;Q8BML9		Qars	-0.489174	1.59971	0.0251357	+	0.031114	+	20.4979	19.8868	20.6003	20.4892	20.6086	20.5753	21.2407	20.7279	21.0285	20.9562	5	5	5	7.3	7.3	7.3	85.054	0	11.332	52892000	11	20.3737	20.8151	20.3049	20.6118	19.1877	19.861	20.8476	20.4371	20.5162	20.4989	20.6251	20.3435	20.7926	20.36	20.6733	20.8241	19.8339	21.068	21.0427	20.9424
Q91V41;Q50HX3	Ras-related protein Rab-14	Rab14	0.591508	2.41473	0.00384827	+	0.00899259	+	21.6903	21.9783	21.6483	21.7055	21.7479	21.3496	21.3185	21.4547	20.7477	20.9422	3	3	3	18.6	18.6	18.6	23.897	0	3.6395	81961000	12	21.8496	21.531	NaN	21.8688	21.8803	22.1858	21.6966	21.593	21.6553	21.8093	NaN	21.6017	21.7306	21.6975	21.8157	21.4419	21.5072	21.0999	21.1871	21.658
Q9D1G1	Ras-related protein Rab-1B	Rab1b	0.653012	1.90473	0.0124528	+	0.0139176	+	21.7223	21.8908	21.2375	21.4747	21.4518	20.632	21.226	20.4089	20.9622	21.2829	5	2	2	39.3	16.4	16.4	22.187	0	16.163	91158000	22	21.7218	21.9416	21.5037	22.156	21.5519	21.9644	21.3828	21.2793	21.0503	21.4254	21.3544	21.6442	21.3306	21.071	21.9539	21.075	19.9984	20.8225	21.2264	20.9225
P51150;A0A0N4SVR6;A0A0N4SVG9	Ras-related protein Rab-7a	Rab7a	0.346406	2.82043	0.00151206	+	0.0186667	+	23.1701	23.2656	23.0445	23.0163	22.9278	22.7256	22.7425	22.585	22.8125	22.8268	4	4	4	24.2	24.2	24.2	23.489	0	323.31	234080000	55	23.2559	23.1442	23.1101	23.2943	23.3253	23.1773	22.9522	23.2194	22.9619	22.9886	22.957	23.1033	22.984	NaN	22.8715	22.7344	22.661	22.7813	22.7964	22.5076
P55258;Q9DD03	Ras-related protein Rab-8A;Ras-related protein Rab-13	Rab8a;Rab13	0.485958	1.92201	0.0119673	+	0.0207581	+	22.7564	22.234	22.2696	22.4702	22.5716	21.6864	21.7081	22.2286	22.1305	22.1184	4	3	2	23.2	17.9	14	23.668	0	18.408	150920000	29	22.6313	22.7733	22.8646	21.6326	22.517	22.5524	22.0842	22.2578	22.4669	22.5475	22.5848	22.2783	22.5315	22.3606	22.8228	21.8705	21.8979	21.2908	21.4992	21.7751
P61028	Ras-related protein Rab-8B	Rab8b	0.813642	3.47966	0.000331392	+	0.00150588	+	21.5982	21.3143	21.3247	21.1283	21.3669	20.3024	20.6585	20.5814	20.8649	20.2571	3	1	1	15.9	6.8	6.8	23.603	0	6.3434	65648000	11	21.6139	21.6994	21.4815	21.4735	21.3017	21.1676	20.9969	21.6071	21.3702	21.176	21.502	20.7068	21.5539	20.9456	21.6012	20.4707	20.3551	20.0813	20.7248	20.7628
Q61550	Double-strand-break repair protein rad21 homolog	Rad21	0.680867	3.18225	0.000657287	+	0.00327273	+	22.9542	22.8526	22.7607	22.6046	22.7194	22.2131	22.3717	21.7231	22.1906	21.9887	5	5	5	10.9	10.9	10.9	72.082	0	28.212	188810000	73	22.8725	22.8874	23.1028	23.191	22.7798	22.587	22.5038	23.058	22.7201	22.8596	22.5865	22.3677	22.6006	22.7963	22.7613	22.9438	21.6583	22.0373	22.7638	22.1635
A0A3B2WCL5;Q9CT10	Ran-binding protein 3	Ranbp3	0.30737	2.16703	0.00680726	+	0.0387094	+	20.7636	20.6734	20.4271	20.5692	20.7141	20.2917	20.379	20.2043	20.209	20.5267	3	3	3	6.5	6.5	6.5	59.33	0	3.6631	43429000	15	20.6669	NaN	20.8604	20.6714	20.6306	20.7182	20.1956	20.4025	20.6832	20.566	20.5681	20.5735	20.903	20.5205	20.7188	20.3977	20.9647	19.5126	20.5138	20.3695
Q99JI6	Ras-related protein Rap-1b	Rap1b	0.489025	3.5063	0.000311674	+	0.00531282	+	25.5152	25.0934	25.2785	25.3	25.1059	24.7094	24.7711	24.8496	24.7229	24.7949	6	6	2	40.8	40.8	14.1	20.825	0	38.684	1104000000	73	25.3528	25.8794	25.3134	25.5909	24.222	25.4674	25.3485	25.3883	25.0986	25.091	25.3132	25.4958	25.0185	25.1781	25.121	24.6662	24.5816	24.8805	24.8375	24.6233
Q9D0I9	Arginine--tRNA ligase, cytoplasmic	Rars	-0.534272	2.53302	0.00293076	+	0.0100939	+	23.7133	23.7489	23.6068	23.2287	23.3556	24.1036	24.1588	24.1255	23.7685	24.1684	12	12	12	22.3	22.3	22.3	75.673	0	14.075	435790000	84	23.6988	23.6201	23.8209	23.7951	23.8597	23.5918	23.6231	23.5698	23.6277	23.3112	22.9527	23.4224	23.1867	23.3859	23.4942	24.1582	24.0907	24.0619	24.1639	24.1202
Q60790	Ras GTPase-activating protein 3	Rasa3	1.04742	3.14538	0.00071552	+	0.00145	+	21.5221	20.6338	21.288	21.3649	21.333	20.398	20.1587	20.4213	19.7356	20.1911	6	6	6	10	10	10	95.986	0	6.1499	58470000	13	21.6352	21.4024	21.5288	21.4872	20.6364	19.7778	21.7366	21.3325	20.7949	20.7294	22.0161	21.3491	21.4254	21.2216	21.352	20.7091	19.8406	20.6444	20.1253	20.1882
Q9CW46;A0A1L1SRY4	Ribonucleoprotein PTB-binding 1	Raver1	0.552769	3.94309	0.000114001	+	0.00298361	+	23.4903	23.2148	23.3047	23.1822	23.2958	22.5521	22.7651	22.7213	22.9152	22.7702	7	7	7	23.3	23.3	23.3	79.381	0	31.717	299790000	46	23.1846	23.5677	23.7186	23.1548	23.1612	23.3283	22.937	23.6579	23.3192	23.3943	23.1151	23.0371	23.1389	23.4157	23.3328	22.7739	22.0877	22.7946	22.5894	23.0726
Q60972	Histone-binding protein RBBP4	Rbbp4	0.458655	3.18403	0.000654584	+	0.00752066	+	25.6856	25.8175	25.8014	25.65	25.8198	25.4886	25.1184	25.2719	25.4584	25.1437	12	12	8	48.2	48.2	41.2	47.655	0	323.31	1510600000	61	25.3178	25.8936	25.8453	25.5252	25.6282	26.299	25.5568	25.9791	25.8685	25.8335	25.5235	25.5929	25.699	25.6745	26.086	25.5621	25.5688	25.3348	25.1195	24.7298
A0A2I3BQC0;A2AFI4;A2AFI3;A0A2I3BRL8;Q9WV02-2;Q91VM5;Q9WV02	RNA-binding motif protein, X chromosome;RNA-binding motif protein, X chromosome, N-terminally processed;RNA binding motif protein, X-linked-like-1	Rbmx;Rbmxl1	-0.511137	2.94706	0.00112964	+	0.00711111	+	21.6587	21.8817	21.6385	21.5704	21.9422	22.2162	22.1403	22.0845	22.3037	22.5025	2	2	2	70	70	70	3.2357	0	2.7401	130230000	18	21.1201	22.0852	21.7707	21.7927	22.3188	21.5337	21.6799	21.7629	21.4728	21.2652	21.8757	NaN	21.7688	21.7999	22.2577	21.7458	22.4316	22.4713	22.5366	22.1489
Q3U6F1;E9Q7W0;A0A0J9YTV5;P31266-2;P31266	Recombining binding protein suppressor of hairless	Rbpj	-0.541628	1.35206	0.0444572	+	0.0392253	+	19.1628	18.8611	18.956	19.6641	18.7318	19.5219	19.2793	20.0864	19.3171	19.8792	2	2	2	4.5	4.5	4.5	51.926	0.00072993	2.07	13678000	7	19.1163	19.1965	19.1756	18.8611	NaN	NaN	18.956	NaN	NaN	19.8655	19.4628	NaN	NaN	18.7318	NaN	19.079	NaN	19.9648	19.4415	19.6478
Q9WUK4	Replication factor C subunit 2	Rfc2	0.965277	2.1482	0.00710889	+	0.006	+	21.8784	22.0794	22.3942	22.0521	22.1653	21.4179	20.3116	21.6143	21.594	20.8053	4	4	4	15.8	15.8	15.8	38.724	0	8.504	107870000	18	21.6768	21.9993	21.9591	21.6018	22.3712	22.2652	22.6404	21.9374	22.6047	22.1865	21.3985	22.5714	22.5436	22.1735	21.7789	20.7856	21.5811	21.887	20.4229	NaN
Q3UI84;Q99J62;D6RGM1	Replication factor C subunit 4	Rfc4	0.331055	2.01176	0.00973275	+	0.0383806	+	23.0458	22.9385	22.8409	22.7812	22.7663	22.8137	22.4146	22.3496	22.6369	22.5028	7	7	7	23.5	23.5	23.5	40.918	0	9.4873	210750000	70	23.0178	23.0641	23.0556	22.988	22.7723	23.0554	22.829	22.9631	22.7307	22.9218	22.7443	22.6777	22.7801	22.6918	22.8271	22.729	22.9211	22.7909	22.8111	21.7564
P84096;A0A1B0GSL4	Rho-related GTP-binding protein RhoG	Rhog	0.476737	1.72309	0.0189195	+	0.0283273	+	21.9131	21.7755	21.3827	21.5597	21.7158	20.694	21.2315	21.3396	21.2062	21.4918	5	4	4	37.2	31.4	31.4	21.308	0	5.3458	87336000	17	21.7951	22.0685	21.8756	21.8776	21.5727	21.8763	22.0363	20.6909	21.4209	21.4068	21.5871	21.6853	21.9939	21.4378	NaN	20.6534	21.1056	20.3229	21.4385	21.0083
Q05C51;F6RP29;Q9CWY8	Ribonuclease;Ribonuclease H2 subunit A	Rnaseh2a	0.710485	1.84876	0.0141656	+	0.0133976	+	21.3403	21.189	NaN	22.1801	21.9912	20.8777	21.0544	20.9359	21.0914	20.864	2	2	2	7.9	7.9	7.9	28.148	0	2.4656	57793000	12	21.3256	21.3498	21.3454	21.3536	21.0585	21.1551	NaN	NaN	NaN	NaN	21.8021	22.5581	NaN	NaN	21.9912	20.4574	21.3614	20.8143	21.1703	21.2548
Q91VI7;A0A1B0GSG5	Ribonuclease inhibitor	Rnh1	-0.251064	2.68738	0.00205408	+	0.044084	+	23.2096	23.0344	23.0747	23.2762	23.2481	23.4622	23.3887	23.4725	23.3213	23.4536	12	12	12	41	41	41	49.816	0	24.394	305080000	77	23.1148	23.4672	23.0467	23.49	22.2764	23.3369	22.9566	23.1864	23.0812	23.213	23.425	23.1907	23.3711	23.1244	23.249	23.6272	23.2881	23.4713	23.2333	23.412
Q99M28-2;Q99M28	RNA-binding protein with serine-rich domain 1	Rnps1	0.38671	1.96535	0.0108306	+	0.0299559	+	22.3154	22.4884	22.2362	21.8812	22.2585	21.8853	21.6771	21.7651	22.0479	21.8708	3	3	3	12.4	12.4	12.4	31.709	0	8.3444	120830000	27	22.3067	22.3887	22.2508	NaN	22.434	22.5428	22.0589	22.2938	22.3558	21.4974	21.8658	22.2803	22.3657	22.1513	NaN	21.8482	21.9717	21.8359	20.8797	22.0231
Q5SWN2;Q8VEE4	Replication protein A 70 kDa DNA-binding subunit;Replication protein A 70 kDa DNA-binding subunit, N-terminally processed	Rpa1	0.485255	1.61245	0.0244092	+	0.0310238	+	22.7116	23.3567	23.4631	23.6808	23.4931	22.9254	22.9871	22.7884	22.911	22.6671	9	9	9	18.8	18.8	18.8	71.413	0	12.879	294890000	46	23.4357	21.4118	23.2874	23.3736	23.1317	23.5649	23.6128	23.2554	23.5211	23.6525	24.0896	23.3003	23.5128	23.4443	23.5221	22.8906	22.9971	22.8887	22.87	22.9993
Q9CQ71	Replication protein A 14 kDa subunit	Rpa3	0.379124	2.85097	0.00140939	+	0.0151388	+	23.046	22.8529	22.779	22.784	22.6905	22.6349	22.4285	22.3783	22.4837	22.3313	3	3	3	31.4	31.4	31.4	13.584	0	5.9074	202140000	36	22.7791	23.0771	23.2818	22.7147	22.812	23.032	22.7415	22.9413	22.6543	22.8766	22.7076	22.7676	22.6488	22.96	22.4626	22.5432	22.7551	22.6065	22.4705	22.5038
I7HLV2;Q6ZWV3;P86048	60S ribosomal protein L10;60S ribosomal protein L10-like	Rpl10;Rpl10l	-0.395545	2.15922	0.00693075	+	0.0238369	+	24.5228	24.1704	24.2192	24.2793	24.5768	24.6111	24.9974	24.7429	24.795	24.5997	5	5	5	36.8	36.8	36.8	23.072	0	323.31	786920000	36	24.4016	24.7121	24.4547	24.1017	24.1693	24.2402	24.1241	24.2768	24.2566	24.4408	23.9851	24.4118	24.3514	24.7086	24.6703	24.6481	24.7992	24.3861	24.9434	24.9806
Q9CXW4;A2BH06	60S ribosomal protein L11	Rpl11	-1.0101	7.22235	5.99306e-08	+	0	+	23.947	24.0169	24.031	23.9424	23.8246	25.0726	24.9316	24.9681	24.8401	24.9998	4	4	4	26.4	26.4	26.4	20.252	0	323.31	738150000	46	24.0105	24.15	23.6805	23.9649	23.8385	24.2473	24.043	23.9384	24.1115	24.0001	23.8306	23.9965	23.7611	24.0344	23.6783	25.0555	25.1027	25.0597	24.8778	25.2546
P35979	60S ribosomal protein L12	Rpl12	-0.801858	3.34128	0.000455739	+	0.00184946	+	24.628	23.9262	24.0604	24.0714	24.2129	24.9051	25.2473	24.9597	24.9785	24.8176	4	4	4	33.3	33.3	33.3	17.804	0	36.512	798690000	46	24.6424	24.7807	24.4611	24.0444	23.5235	24.2106	23.8247	23.966	24.3905	23.7083	24.2893	24.2165	24.1338	24.319	24.1859	25.3981	24.6425	24.6748	24.9709	25.6101
P47963	60S ribosomal protein L13	Rpl13	-0.763766	2.61409	0.0024317	+	0.00419672	+	24.3343	25.1991	25.0919	25.1464	24.7316	25.8931	25.5779	25.5359	25.6999	25.6154	8	8	8	37.9	37.9	37.9	24.305	0	297.35	1272800000	37	24.4977	24.9295	23.5757	25.1129	24.8359	25.6487	25.1805	24.9311	25.1642	24.9476	24.9576	25.534	24.6099	24.8711	24.7138	25.9914	25.8986	25.7893	25.7684	25.5721
P19253;A0A1B0GSB2;A0A1B0GSC2;A0A1B0GRH1;A0A1B0GSQ6;A0A1B0GS68;A0A1B0GSL5;A0A1B0GT00;A0A1B0GTA1	60S ribosomal protein L13a	Rpl13a	-0.4533	4.18057	6.59822e-05	+	0.00381287	+	25.6375	25.7232	25.6003	25.3882	25.4925	26.0603	25.9964	25.9837	26.0439	26.0239	6	6	6	32	32	32	23.464	0	38.753	1818900000	102	25.5315	25.7805	25.6004	25.7156	25.8212	25.6328	25.7056	25.5001	25.5954	25.4518	25.3022	25.4108	25.4259	25.42	25.6316	25.9066	26.1876	26.0868	26.0616	26.0244
Q9CR57;A0A1L1SUF6	60S ribosomal protein L14	Rpl14	-0.804063	3.52022	0.000301844	+	0.00152381	+	23.1346	22.9602	22.8641	22.8147	22.8929	24.1033	23.8291	23.5044	23.8099	23.4401	4	4	4	19.8	19.8	19.8	23.564	0	40.942	327600000	45	23.2755	22.9854	23.1427	22.9288	23.0511	22.9006	22.479	23.0026	23.1107	22.9692	22.9217	22.5532	22.9582	22.8027	22.9178	23.9483	24.27	24.0914	23.609	23.9268
Q9CZM2	60S ribosomal protein L15	Rpl15	-0.364674	3.19797	0.000633911	+	0.0133051	+	25.6296	25.7795	25.7533	25.7652	25.9165	26.034	26.1425	26.3168	26.1117	26.0623	9	9	9	43.6	43.6	43.6	24.146	0	323.31	2011000000	93	25.6488	25.7103	25.5298	25.7017	25.7776	25.8592	25.9768	25.7185	25.5646	25.7666	25.8313	25.6976	25.9914	26.0343	25.7239	26.182	26.2425	25.6776	26.5728	25.8035
Q6ZWZ7;Q9CPR4	60S ribosomal protein L17	Rpl17	-0.872168	2.80507	0.0015665	+	0.00309091	+	23.6418	23.691	23.5129	23.6691	23.3869	24.7505	23.9372	24.9016	24.1888	24.4845	6	6	6	40.2	40.2	40.2	21.397	0	204.26	571450000	45	23.7369	23.6571	23.5315	23.9261	23.6655	23.4815	23.6633	23.9032	22.9722	23.8148	23.656	23.5366	23.4786	22.86	23.8222	24.5529	25.3593	24.3393	23.3023	24.0532
A0A1B0GQU8;P35980;A0A1B0GSA8;A0A1B0GSF7;A0A1B0GSS8	60S ribosomal protein L18	Rpl18	-0.587167	4.11592	7.65735e-05	+	0.00232	+	24.9856	25.1953	25.1944	24.852	25.064	25.7828	25.5862	25.5147	25.6762	25.6673	5	5	5	27.7	27.7	27.7	18.101	0	323.31	1430900000	77	24.2199	25.3037	25.4332	25.2263	25.1677	25.192	25.0953	25.2398	25.2481	24.64	24.9841	24.9318	25.0257	24.9852	25.1811	25.6227	26.0981	25.6276	25.7952	25.5179
A0A1D5RLW5;A0A1D5RM85;P62717;A0A1D5RME4;A0A1D5RM79	60S ribosomal protein L18a	Rpl18a	-0.573421	3.8554	0.00013951	+	0.00276667	+	24.9822	25.1812	25.2166	25.0266	25.0137	25.7499	25.4515	25.5971	25.8614	25.6275	5	5	5	36.1	36.1	36.1	17.447	0	323.31	1350500000	56	24.9307	25.0606	24.9552	25.0451	25.2058	25.2928	25.1529	25.3969	25.1001	25.1972	24.8059	25.0767	24.8652	25.1491	25.0269	25.6312	25.8732	25.7452	25.6138	25.4452
A2A547;P84099	Ribosomal protein L19;60S ribosomal protein L19	Rpl19	-0.954551	1.51076	0.0308488	+	0.016973	+	22.328	24.166	24.0169	24.3032	23.8755	24.8777	24.7792	24.5848	24.5439	24.6769	4	4	4	25.3	25.3	25.3	23.247	0	283.14	683820000	30	23.8652	21.8279	21.2909	23.9392	24.2757	24.2831	24.403	23.474	24.1737	24.2814	24.0824	24.5459	23.7803	24.0731	23.7732	25.2288	24.5837	24.8205	24.864	24.8778
P67984	60S ribosomal protein L22	Rpl22	-0.619393	2.10598	0.00783462	+	0.0123779	+	24.4974	24.6479	23.7708	24.2162	24.5219	25.1333	25.066	24.8941	24.9835	24.6742	3	3	3	39.1	39.1	39.1	14.759	0	211.16	845000000	63	24.6118	24.4147	24.4657	24.6213	24.5917	24.7308	24.1084	24.252	22.9521	24.0889	24.1775	24.3822	24.6866	24.4098	24.4692	24.8529	25.2725	25.2746	25.1046	24.9373
P62830;A2A6F8	60S ribosomal protein L23	Rpl23	-0.926284	2.03877	0.00914604	+	0.00736134	+	23.363	22.7103	23.1784	23.2772	23.0741	24.4111	24.2753	23.0699	24.2234	24.2548	4	4	4	27.1	27.1	27.1	14.865	0	17.608	447630000	26	23.2738	23.3608	23.4543	22.0779	23.1555	22.8976	23.2975	22.7778	23.4599	23.3264	23.3434	23.1617	23.1124	23.3059	22.8039	24.953	24.0869	24.1934	23.7279	25.1698
Q8BP67	60S ribosomal protein L24	Rpl24	-0.871882	5.80386	1.57086e-06	+	0	+	24.4192	24.4956	24.3866	24.1614	24.3156	25.254	25.1598	25.1743	25.3769	25.1728	5	5	5	30.6	30.6	30.6	17.779	0	12.082	890080000	64	24.2073	24.5784	24.472	24.5268	24.5986	24.3615	24.3391	24.5183	24.3024	24.1384	24.076	24.2699	24.3082	24.301	24.3376	25.1536	25.346	25.2624	25.2958	25.1559
P14115	60S ribosomal protein L27a	Rpl27a	-0.680479	1.47841	0.0332348	+	0.0249528	+	24.2144	25.1963	24.931	24.7983	25.0632	26.035	25.4584	25.6954	25.616	24.8008	4	4	4	28.4	28.4	28.4	16.605	0	323.31	1274800000	47	25.064	22.7744	24.8049	24.8366	25.2713	25.481	24.8698	24.9107	25.0124	24.1749	24.9668	25.2531	25.446	24.8494	24.8941	26.0137	25.8564	26.2349	25.4297	25.2395
P41105	60S ribosomal protein L28	Rpl28	-0.931423	2.88562	0.00130129	+	0.00245045	+	25.9941	25.7632	26.459	26.032	26.1088	27.4139	26.9585	26.8288	27.2734	26.5396	6	6	6	43.8	43.8	43.8	15.733	0	94.954	3132300000	88	25.9902	25.9741	26.018	26.2816	25.2392	25.7688	26.4702	26.55	26.3567	25.9462	26.1944	25.9554	26.2409	26.3307	25.7547	27.1653	27.6695	27.4069	27.004	27.0005
P27659	60S ribosomal protein L3	Rpl3	-0.498986	2.74841	0.00178479	+	0.00913653	+	26.2998	26.1833	26.1312	25.8692	26.0961	26.8561	26.7672	26.5171	26.4341	26.5001	13	13	13	36.5	36.5	36.5	46.109	0	323.31	2621300000	84	26.2885	26.2991	26.3118	26.1739	26.1958	26.1802	26.3089	26.194	25.8909	25.8758	25.7451	25.9867	26.0744	26.3256	25.8884	26.7165	27.1009	26.751	26.7044	26.7879
P62889;A0A2I3BQF4	60S ribosomal protein L30	Rpl30	-0.749606	4.87202	1.3427e-05	+	0.000680851	+	24.2691	24.3727	23.9868	24.259	24.3576	25.0053	24.9018	24.9296	25.1226	25.034	7	7	7	60.9	60.9	60.9	12.784	0	69.134	831190000	112	24.2405	24.3601	24.2066	24.3882	24.3709	24.3591	23.9316	24.0024	24.0265	24.2459	24.2294	24.3018	24.2768	24.4794	24.3165	25.2307	24.8361	24.949	25.4108	24.8571
P62900;A0A0A6YX26;A0A0A6YXL3	60S ribosomal protein L31	Rpl31	-0.547339	2.154	0.00701454	+	0.0135495	+	24.0492	24.1917	24.1413	24.0019	24.1288	24.1017	24.746	24.5977	24.9164	24.8877	4	4	4	32.8	32.8	32.8	14.463	0	32.242	685730000	53	24.0862	24.0276	24.0337	24.1994	24.0877	24.2879	24.1289	24.0072	24.2879	24.0109	24.1433	23.8515	24.0225	24.0944	24.2696	24.7164	22.8363	24.7525	24.4785	24.9107
P62911	60S ribosomal protein L32	Rpl32	-0.650159	1.68562	0.0206243	+	0.0186361	+	24.776	23.4299	24.2503	24.3446	24.2251	24.954	25.0185	24.8345	24.7946	24.6751	4	4	4	28.1	28.1	28.1	15.86	0	323.31	804930000	55	25.0055	24.6348	24.6877	24.3005	24.6618	21.3273	24.4625	24.257	24.0315	24.4424	24.4373	24.1541	24.3065	24.2273	24.1413	25.0769	24.9777	24.8074	24.9152	25.3073
A0A2I3BPG9;P83882	60S ribosomal protein L36a	Rpl36a	-0.618616	3.50187	0.000314868	+	0.0031145	+	23.082	23.2231	22.9829	22.8811	23.0691	23.754	23.5304	23.6438	23.4592	23.9438	3	3	3	19.8	19.8	19.8	12.455	0	9.9638	335230000	43	22.8499	23.1065	23.2898	22.9195	23.4709	23.279	22.9026	23.0036	23.0424	22.6992	22.6634	23.2807	22.8074	23.0792	23.3207	23.6707	23.6385	23.9527	23.5258	23.4259
P61514;A0A1D5RL86	60S ribosomal protein L37a	Rpl37a	-0.894306	4.32508	4.73068e-05	+	0.000695652	+	23.382	23.6821	23.658	23.2611	23.4037	24.569	24.1237	24.4628	24.4228	24.2802	4	4	4	48.9	48.9	48.9	10.275	0	179.28	492160000	46	23.3123	23.2904	23.5434	23.5988	23.9653	23.4823	23.8767	23.4951	23.6022	22.9357	23.0761	23.7715	23.5175	23.3257	23.3679	24.5923	24.8061	24.3086	24.4026	23.854
Q9JJI8	60S ribosomal protein L38	Rpl38	-0.786547	3.00408	0.00099065	+	0.00309677	+	22.6086	22.2639	22.3575	21.9629	22.3612	23.1547	23.3789	22.7574	23.2858	22.9101	2	2	2	28.6	28.6	28.6	8.2038	0	3.1345	194180000	12	22.4785	22.7411	22.6063	22.4054	NaN	22.1225	22.2447	22.3384	22.4893	22.1213	21.9951	21.7723	NaN	22.2424	22.4801	23.1616	23.0423	23.2603	23.0329	23.5807
Q9D8E6	60S ribosomal protein L4	Rpl4	-0.458242	4.64496	2.26484e-05	+	0.00329577	+	27.0513	27.0165	26.9148	26.8334	27.0142	27.4961	27.5016	27.334	27.4212	27.3684	16	16	16	32.5	32.5	32.5	47.153	0	323.31	4738400000	137	27.0772	26.9883	27.0885	27.3278	26.5194	27.2022	26.9884	26.7332	27.0227	26.7099	26.9212	26.8691	27.1096	26.8389	27.0941	27.7159	27.5434	27.229	27.5271	27.457
P47962;D3YYV8	60S ribosomal protein L5	Rpl5	-0.777099	2.80149	0.00157948	+	0.0035414	+	26.8647	27.1239	26.4119	26.5857	26.7806	27.9376	27.3211	27.5908	27.3328	27.4701	11	11	11	37.7	37.7	37.7	34.4	0	298.96	4759000000	137	26.6614	26.7629	27.1698	27.2566	27.1891	26.9261	26.5717	25.4886	27.1754	26.6542	26.833	26.2698	26.9095	26.371	27.0614	27.8159	28.8245	27.1726	27.5107	27.4572
P47911	60S ribosomal protein L6	Rpl6	-0.392566	2.62359	0.00237909	+	0.0165027	+	26.3802	26.4703	26.1995	26.1216	26.4873	26.8205	26.8323	26.7399	26.6806	26.5485	10	10	10	40.9	40.9	40.9	33.509	0	83.873	3057200000	124	26.2978	26.3766	26.4661	26.4099	26.5889	26.4121	26.2631	26.115	26.2204	26.0593	26.0147	26.2907	26.2909	26.5561	26.6148	26.9213	26.7406	26.7996	26.7763	26.8597
P12970	60S ribosomal protein L7a	Rpl7a	-0.652866	3.47014	0.000338733	+	0.00281356	+	26.091	26.1309	25.8085	25.9524	26.1406	26.8758	26.6366	26.5424	26.8896	26.4434	9	9	9	33.1	33.1	33.1	29.976	0	85.24	2673800000	76	26.106	26.0471	26.12	26.1647	25.8971	26.3307	25.757	25.7323	25.9362	25.8071	25.9835	26.0667	25.945	26.2439	26.233	26.9095	26.9001	26.8178	26.7358	26.7574
P62918	60S ribosomal protein L8	Rpl8	-0.585756	2.20324	0.00626272	+	0.0120656	+	24.0682	24.81	24.5047	24.4349	24.2812	25.4053	24.9535	24.8845	24.9286	24.8559	7	7	7	31.1	31.1	31.1	28.024	0	17.562	826840000	28	23.8393	24.2858	24.0794	25.0282	24.9082	24.4937	24.6602	24.4625	24.3915	24.0465	24.4656	24.7927	24.2137	24.1548	24.4751	25.2454	25.1618	25.8087	25.2226	24.9043
A0A140T8T4;P51410;A0A0G2JES3;D3Z629	60S ribosomal protein L9	Rpl9	-0.701649	3.00843	0.000980768	+	0.00351282	+	23.9781	23.9612	24.1003	24.0495	24.0773	24.8375	24.9523	24.2456	24.9907	24.6486	6	6	6	49.5	49.5	49.5	21.853	0	30.439	716160000	39	23.9682	24.1843	23.782	23.7681	24.1651	23.9503	24.2669	24.0674	23.9667	23.9348	23.9624	24.2514	24.1571	24.061	24.0138	24.8243	24.6655	25.0227	25.0819	24.8219
P14869;S4R1N1;D3YVM5	60S acidic ribosomal protein P0	Rplp0	-0.275616	3.1448	0.000716473	+	0.0283175	+	26.8592	26.6537	26.7873	26.8081	26.7629	27.1361	27.1509	26.9583	27.002	27.0019	11	11	11	56.2	56.2	56.2	34.216	0	323.31	4040200000	161	26.8866	26.9077	26.7833	26.1829	26.9608	26.8173	26.7428	26.7393	26.8799	26.9148	26.7826	26.7269	26.7434	26.7622	26.7831	27.1695	27.1496	27.0893	27.0244	27.0828
Q91YQ5	Dolichyl-diphosphooligosaccharide--protein glycosyltransferase subunit 1	Rpn1	-0.653967	3.36801	0.000428543	+	0.00314961	+	22.1571	22.2904	22.2519	21.8703	21.9955	22.4772	22.7534	22.8488	22.9721	22.7835	7	7	7	15.5	15.5	15.5	68.527	0	12.357	176320000	61	22.2191	22.0207	22.2314	22.3135	22.3417	22.2161	22.0848	22.536	22.1348	22.0755	21.9148	21.6206	22.1782	21.8657	21.9426	21.9433	22.9925	22.4957	22.477	22.8712
A2ACG7;Q9DBG6	Dolichyl-diphosphooligosaccharide--protein glycosyltransferase subunit 2	Rpn2	-1.19758	2.50259	0.00314346	+	0.00300826	+	19.5541	19.609	20.2898	19.3584	19.4435	21.2726	20.339	21.0204	21.3679	20.2428	3	3	3	5	5	5	67.501	0	2.749	42525000	12	19.4357	19.6322	19.5944	20.1117	20.2125	18.5027	20.6235	20.0916	20.1544	19.1949	19.1517	19.7287	NaN	19.1834	19.7036	20.569	21.698	21.5507	20.9334	20.1145
A0A0R4J195;Q9CSU0-2;Q9CSU0;F6YB25;Q9CSU0-3	Regulation of nuclear pre-mRNA domain-containing protein 1B	Rprd1b	0.27302	3.71494	0.000192777	+	0.0221136	+	21.91	21.8195	21.7747	21.8494	21.7736	21.5515	21.663	21.4745	21.4934	21.5797	5	5	5	20.3	20.3	20.3	36.812	0	5.0278	103170000	14	21.972	21.8421	21.9158	21.7658	21.905	21.7877	21.5205	21.9151	21.8885	22.0387	22.0736	21.436	21.5741	21.7507	21.9961	21.7177	21.3875	21.5492	21.7038	21.7713
P63325;A0A338P731;Q3UW83;A0A338P7K4;A0A3B2W864	40S ribosomal protein S10	Rps10	-1.1246	1.70912	0.0195381	+	0.0110103	+	21.4105	21.7037	20.4698	20.3208	20.2121	21.645	22.8861	21.7009	21.8009	21.707	3	3	3	27.3	27.3	27.3	18.916	0	202.34	148620000	5	22.1634	21.4284	20.6397	21.9046	NaN	21.5028	19.8039	21.6033	20.0022	21.3996	20.3751	19.1876	19.4004	NaN	21.0238	22.1911	21.2531	21.4908	20.9913	25.028
P62281;A0A1B0GRR3;A0A1B0GSE8	40S ribosomal protein S11	Rps11	-0.864238	2.36005	0.0043647	+	0.00528571	+	22.1704	22.1953	22.1638	22.2602	22.0644	23.5065	23.2519	22.644	22.3958	23.3771	4	4	4	29.1	29.1	29.1	18.431	0	8.0407	208190000	28	21.4885	21.9479	23.0748	22.2435	22.406	21.9365	22.3155	22.0585	22.1174	22.2359	22.3743	22.1704	22.1763	21.6123	22.4047	23.1253	24.0378	23.3565	23.6118	22.8969
P62264;D3YVF4;D3Z7I1	40S ribosomal protein S14	Rps14	-0.874829	2.1949	0.00638413	+	0.00656221	+	23.3018	22.6589	23.4724	23.6956	22.8625	24.2707	24.433	23.8897	24.1431	23.6288	4	4	4	31.1	31.1	31.1	16.273	0	33.946	416650000	14	23.3534	23.5552	22.9967	23.0493	22.2684	NaN	23.5409	23.7479	23.1286	23.9077	23.4353	23.744	23.25	23.7682	21.5692	23.8637	24.403	24.5454	24.5548	24.5143
F8WJ41;P62245;D3YVB4;D3Z712	40S ribosomal protein S15a	Rps15a	-0.861318	4.29552	5.06387e-05	+	0.000615385	+	24.165	24.6019	24.5643	24.3452	24.2943	25.4293	25.2003	25.0163	25.3744	25.2571	7	7	7	51.9	51.9	51.9	12.31	0	141.37	969670000	94	24.0514	24.2967	24.1469	24.8754	24.2968	24.6335	24.767	24.6271	24.2989	24.3265	24.0711	24.6379	24.3703	24.2674	24.2453	25.1956	25.4973	25.5949	25.2129	25.333
P14131	40S ribosomal protein S16	Rps16	-0.953929	2.36433	0.00432184	+	0.00422599	+	23.5945	24.4256	24.4018	23.8616	24.0696	25.5474	25.3425	24.56	24.8992	24.7737	5	5	5	33.6	33.6	33.6	16.445	0	7.688	803250000	19	24.2266	23.9877	22.5691	24.367	24.4725	24.4371	24.5344	24.3178	24.3533	24.1104	23.5453	23.9291	23.9418	24.2811	23.986	25.2969	25.777	25.5683	25.6225	25.1108
Q9CZX8;D3YUT3;D3YUG3;D3Z5R8;D3Z722	40S ribosomal protein S19	Rps19	-1.02684	7.35743	4.39109e-08	+	0	+	25.0508	24.9575	24.8596	24.9727	25.0819	26.1106	26.0668	25.9841	25.9193	25.976	5	5	5	35.2	35.2	35.2	16.085	0	28.044	1519400000	79	24.9761	24.9468	25.2296	24.7294	25.0341	25.109	24.6656	24.9843	24.9289	24.7028	25.2825	24.9329	24.955	25.1233	25.1673	25.9184	26.3482	26.0651	26.0498	26.2868
P25444;D3YVC1;D3YWJ3	40S ribosomal protein S2	Rps2	-0.922255	4.78535	1.63926e-05	+	0.000266667	+	25.8336	25.8241	25.9387	25.6874	25.8966	27.1083	26.7494	26.6217	26.7044	26.6081	10	10	10	41.6	41.6	41.6	31.231	0	42.442	2650600000	92	25.5202	26.034	25.9467	25.5038	26.0604	25.9081	25.6653	26.1305	26.0202	25.8232	25.9461	25.293	25.8221	26.0051	25.8626	27.2275	27.1437	26.9536	26.7609	26.6353
P60867	40S ribosomal protein S20	Rps20	-1.30369	4.1718	6.73281e-05	+	0.000421053	+	21.9042	21.7434	22.6008	22.1932	22.265	23.5932	23.1818	23.3386	23.4358	23.6755	2	2	2	20.2	20.2	20.2	13.373	0	2.2909	239770000	12	21.7833	22.2575	21.6717	20.3737	22.5724	22.2841	22.4804	22.5075	22.8144	22.2555	21.9327	22.3914	NaN	22.1907	22.3393	24.2362	22.7187	23.8247	22.9788	23.4919
A0A1L1SQA8;P62852	40S ribosomal protein S25	Rps25	-0.869745	4.62203	2.38765e-05	+	0.0006	+	25.6957	25.5337	25.7601	26.0005	25.9641	26.6658	26.5502	26.6551	26.59	26.8417	4	4	4	39.8	39.8	39.8	10.309	0	256.03	2492500000	79	25.7479	25.5333	25.806	26.6141	26.3879	23.599	25.8761	25.479	25.925	25.7551	26.3105	25.9359	25.7191	25.7112	26.4621	26.8755	27.1147	26.0072	26.8824	26.5973
P62274	40S ribosomal protein S29	Rps29	-1.14251	1.82094	0.0151029	+	0.00784615	+	21.0776	20.8415	NaN	21.8562	20.0987	22.4048	22.4481	22.1213	21.7316	21.8492	2	2	2	21.4	21.4	21.4	6.6767	0.0027701	1.8197	94924000	4	21.0776	NaN	NaN	NaN	20.2965	21.3864	NaN	NaN	NaN	21.528	22.4782	21.5625	NaN	19.7583	20.4392	22.2496	21.8093	23.1556	22.4468	22.4757
P62908;D3YV43;A0A140LI77	40S ribosomal protein S3	Rps3	-0.900115	5.24411	5.70018e-06	+	0.000470588	+	24.9592	25.0685	25.1518	25.0002	24.9524	26.1872	25.7334	25.8289	25.9077	25.9755	13	13	13	64.6	64.6	64.6	26.674	0	41.056	1543100000	109	25.04	25.0483	24.7894	25.077	25.2902	24.8383	25.059	25.1973	25.1989	24.8924	24.9292	25.179	25.1162	24.7951	24.946	26.2308	26.3193	26.0115	25.9221	25.526
P97351	40S ribosomal protein S3a	Rps3a	-0.848702	6.29358	5.08647e-07	+	0	+	25.7366	25.7973	25.7025	25.5575	25.6632	26.6414	26.4625	26.4291	26.63	26.5377	9	9	9	37.5	37.5	37.5	29.885	0	130.75	2238600000	102	25.6676	25.7604	25.7819	25.7787	25.8133	25.7997	25.5575	25.7669	25.7833	25.4731	25.7318	25.4677	25.4747	25.7136	25.8014	26.7579	26.7292	26.4371	26.4485	26.5693
P62702;V9GWY0	40S ribosomal protein S4, X isoform;40S ribosomal protein S4	Rps4x;Gm15013	-0.735228	1.73302	0.0184918	+	0.0152605	+	25.1483	24.5324	24.8732	24.9524	25.13	24.7812	26.014	25.8159	25.837	25.8642	8	8	8	38	38	38	29.597	0	267.93	1381900000	58	25.2243	25.0607	25.1598	25.1926	23.096	25.3087	24.8149	24.8999	24.9048	24.8942	25.0949	24.8683	24.9931	25.2094	25.1874	23.7373	24.7892	25.8172	25.8952	25.936
D3YYM6;D3Z1S8;Q91V55;P97461	40S ribosomal protein S5;40S ribosomal protein S5, N-terminally processed	Rps5	-0.826706	2.84207	0.00143857	+	0.00330935	+	24.4638	23.5812	24.3996	24.2084	24.4603	25.0796	25.1389	24.8994	24.9766	25.1523	6	6	6	35.7	35.7	35.7	20.413	0	183.23	901670000	72	24.3861	24.4904	24.5148	24.4506	24.5563	21.7367	24.0392	24.461	24.6986	23.9068	24.2123	24.506	24.4299	24.2516	24.6994	25.3405	24.9813	24.9171	25.3052	25.0302
P62754	40S ribosomal protein S6	Rps6	-0.78868	3.80139	0.000157983	+	0.0012973	+	23.8956	24.0673	23.9023	23.7176	23.7794	24.9542	24.3928	24.7718	24.7128	24.4741	4	4	4	22.9	22.9	22.9	28.68	0	75.697	640750000	42	23.4037	24.1286	24.1547	24.0435	24.2315	23.927	23.8386	23.9429	23.9256	23.9686	23.7111	23.4732	23.7906	23.268	24.2794	24.7776	25.302	24.7831	24.7625	24.7783
P62242	40S ribosomal protein S8	Rps8	-0.31791	3.87201	0.000134272	+	0.0135928	+	26.6837	26.7477	26.7194	26.6027	26.4995	27.0012	26.9381	26.9516	26.9581	26.9934	12	12	12	56.2	56.2	56.2	24.205	0	323.31	3636100000	173	26.6333	26.8186	26.5992	26.6534	26.8837	26.706	26.6741	26.599	26.885	26.5553	26.6053	26.6475	26.4255	26.6652	26.4077	26.8904	27.1411	26.972	26.9495	26.9527
Q6ZWN5;F7CJS8;D3YWH9;Q9CXW7	40S ribosomal protein S9	Rps9	-0.720829	3.96434	0.000108559	+	0.00131579	+	23.9349	24.2562	23.8983	23.7713	23.8776	24.7279	24.5629	24.5694	24.8843	24.5981	3	3	3	14.4	14.4	14.4	22.591	0	19.603	694170000	33	23.771	23.9207	24.1131	24.2013	24.2234	24.3439	23.7707	23.9646	23.9596	23.8852	23.7911	23.6375	23.8635	23.9071	23.8621	24.7569	24.9293	24.4973	24.4951	24.6
P62071;A0A1B0GRG1;A0A1B0GRT5;P10833	Ras-related protein R-Ras2;Ras-related protein R-Ras	Rras2;Rras	0.548005	2.41149	0.00387717	+	0.0111469	+	20.4706	20.8377	20.6955	20.724	20.5479	20.4753	19.9508	19.7748	20.0967	20.238	2	2	2	11.3	11.3	11.3	23.399	0.00074239	2.1537	40752000	3	20.4249	20.5038	20.4832	20.8642	20.7883	20.8608	21.2759	20.3776	20.433	20.5665	20.5978	21.0076	20.492	20.6179	20.5339	20.3566	20.6196	20.4498	20.2593	20.0825
P11157;D3Z0D8;F6RUC3	Ribonucleoside-diphosphate reductase subunit M2	Rrm2	-0.43367	1.57196	0.0267939	+	0.0384547	+	20.7713	20.7344	20.3062	20.089	20.6412	21.2906	20.8964	20.8964	20.8205	20.8065	2	2	2	6.2	6.2	6.2	45.095	0	4.1259	50029000	9	20.6484	20.6016	21.0639	20.7118	20.7643	20.727	19.5663	20.6221	20.7301	19.0189	20.6333	20.6149	20.5512	20.7103	20.6621	21.258	21.5638	21.05	NaN	20.796
Q9CYH6	Ribosome biogenesis regulatory protein homolog	Rrs1	-0.372377	2.26639	0.00541514	+	0.0243714	+	21.3496	21.4941	21.1485	21.2706	21.0724	21.4431	21.8079	21.7407	21.649	21.5564	4	4	4	13.4	13.4	13.4	41.551	0	4.4348	88890000	26	21.6103	21.1743	21.2641	21.5612	21.6541	21.2671	21.2772	20.8323	21.3361	21.5633	20.9492	21.2994	20.8336	21.1561	21.2275	21.1585	21.7102	21.4607	22.3696	21.3994
Q8BVY0;A0A2R8VHW2	Ribosomal L1 domain-containing protein 1	Rsl1d1	-0.649595	1.37646	0.0420285	+	0.0307739	+	20.081	20.6078	19.6413	20.0195	20.3516	21.1898	NaN	20.5621	21.096	20.3115	3	3	3	8	8	8	50.421	0	3.3343	32538000	4	19.9232	20.21	20.1097	20.4201	20.9285	20.4749	19.0138	19.8764	20.0338	19.1022	20.9368	NaN	20.1837	20.3075	20.5636	21.1898	NaN	NaN	NaN	NaN
A2AQ19	RNA polymerase-associated protein RTF1 homolog	Rtf1	0.557779	1.73895	0.0182412	+	0.0213433	+	20.1613	20.2557	20.2433	20.1292	20.1231	19.862	19.9543	19.7756	19.6199	18.9118	2	2	2	3.1	3.1	3.1	80.796	0.0021157	1.9037	29194000	7	20.1699	20.3017	20.0124	20.1338	20.4177	20.2155	20.3287	20.264	20.1372	20.0061	NaN	20.2522	20.2688	19.9988	20.1017	19.8432	19.9758	19.7672	19.8159	19.8252
P08207	Protein S100-A10	S100a10	0.592343	1.7943	0.0160581	+	0.0184167	+	24.0736	24.8184	24.7934	25.0308	24.4997	23.7645	24.1636	24.2103	23.8452	24.2705	3	3	3	44.3	44.3	44.3	11.186	0	323.31	719610000	77	24.8969	22.4914	24.8325	25.2263	24.1597	25.069	24.6614	24.8806	24.838	25.0575	24.7805	25.2545	24.3122	24.5779	24.6091	24.0269	23.3907	23.8758	23.8016	24.7505
P50543	Protein S100-A11	S100a11	0.834059	1.47889	0.0331981	+	0.0200707	+	24.1368	24.1647	23.6425	24.1243	24.2035	22.3582	23.7759	23.4977	23.8528	22.6169	2	2	2	27.6	27.6	27.6	11.083	0	6.2885	398780000	4	23.9925	24.223	24.1949	24.3092	NaN	24.0201	23.4358	23.6547	23.837	25.0126	24.3211	23.0391	24.1155	24.2915	NaN	20.9195	22.737	23.4182	23.4955	23.973
P97352;A0A0A0MQ90	Protein S100-A13	S100a13	0.899184	1.9689	0.0107425	+	0.00795472	+	22.829	23.732	23.8685	23.3678	22.6739	22.0158	22.1863	22.4418	22.5814	22.75	6	6	6	72.4	72.4	72.4	11.158	0	323.31	288270000	23	22.72	22.6328	23.1343	22.9446	23.4185	24.8329	23.2058	25.2594	23.1404	23.2669	24.2772	22.5593	23.1253	22.0444	22.8519	22.0594	21.53	22.458	22.3664	22.2185
A0A0G2JGD2;P07091	Protein S100-A4	S100a4	2.05915	1.4106	0.0388504	+	0.0129506	+	26.0439	21.9439	25.0569	24.5188	25.0021	21.2505	22.7939	21.4166	23.3894	23.4194	3	3	3	43.6	43.6	43.6	9.0621	0	154.08	955830000	11	26.6341	24.443	27.0547	24.5849	18.6275	22.6193	25.5348	25.4356	24.2002	20.6838	26.2385	26.6341	26.1302	24.8608	24.0154	23.7553	18.4969	21.4993	21.9439	21.3213
S4R1M2;D3YXK2	Scaffold attachment factor B1	Safb	0.446696	4.11745	7.63037e-05	+	0.00420225	+	23.9583	24.0428	23.9875	23.758	23.8902	23.5773	23.3868	23.4127	23.5084	23.518	8	8	4	14.5	14.5	8.1	105.32	0	23.7	430970000	74	23.9551	23.9636	23.9562	24.0988	24.1096	23.92	23.8909	24.075	23.9968	23.7082	23.8594	23.7063	23.7991	23.8847	23.9869	23.5981	23.7631	23.3707	23.5343	23.186
Q60710;F6TVP2;Q60710-2;E9PYG9	Deoxynucleoside triphosphate triphosphohydrolase SAMHD1	Samhd1	0.830371	8.01408	9.68098e-09	+	0	+	25.2399	25.3002	25.2123	25.1525	25.2297	24.4168	24.4367	24.2974	24.4116	24.4205	15	15	15	32.2	32.2	32.2	75.892	0	257.31	961000000	160	25.1777	25.2705	25.2716	25.2898	25.349	25.2618	25.2199	25.1463	25.2708	25.1051	25.1645	25.1879	25.0996	25.3415	25.2481	24.3159	24.5355	24.3989	24.479	24.5663
Q8C483;P26638;A2AFS0	Serine--tRNA ligase, cytoplasmic	Sars	-0.644133	3.02431	0.000945564	+	0.00385799	+	22.3896	22.8781	22.8308	22.8172	22.6206	23.505	23.5447	23.3751	23.0529	23.2794	9	9	9	21.6	21.6	21.6	61.166	0	12.358	267340000	42	22.6083	22.3247	22.2359	22.9769	22.9941	22.6634	23.0135	22.9735	22.5054	22.8668	22.6377	22.9472	22.408	22.7215	22.7324	22.857	23.949	23.7088	23.4307	23.5884
E9PVB7;Q60611	DNA-binding protein SATB;DNA-binding protein SATB1	Satb1	0.667146	3.29684	0.000504848	+	0.00315789	+	22.8466	22.825	23.1452	22.971	23.1527	22.3767	22.3211	22.119	22.6487	22.1393	6	6	6	10.9	10.9	10.9	89.033	0	24.953	207880000	24	22.8527	22.8628	22.8243	22.6993	22.7975	22.9783	23.0914	23.575	22.7693	23.0141	22.8486	23.0504	22.8846	23.6107	22.9627	22.4621	22.3146	22.3533	22.5496	22.1833
E9Q855;Q3UXS0;O35609	Secretory carrier-associated membrane protein 3	Scamp3	0.748292	3.95342	0.000111321	+	0.00131507	+	21.2563	20.9706	20.867	20.8935	21.0672	20.0151	20.392	20.1287	20.3719	20.4053	2	2	2	11.4	11.4	11.4	34.515	0	3.0351	46265000	18	21.4192	20.948	21.4019	21.0833	20.8573	20.9711	21.0797	20.9123	20.609	20.9069	20.7561	21.0174	20.9372	21.1972	NaN	20.0532	19.8045	20.1877	20.2389	NaN
P32020-2;P32020	Non-specific lipid-transfer protein	Scp2	0.450665	1.74536	0.0179739	+	0.0296964	+	23.4355	23.2791	24.0274	23.7968	23.6645	23.396	23.3519	23.075	23.0477	23.0794	4	4	4	26.6	26.6	26.6	15.236	0	4.4519	350230000	16	24.1093	23.8068	22.3905	23.8639	23.7693	22.204	24.1272	24.2055	23.7494	23.816	23.7505	23.8238	23.5328	23.654	23.8067	23.2058	23.6477	23.3344	23.3619	23.2185
Q920A5	Retinoid-inducible serine carboxypeptidase	Scpep1	0.595254	2.30538	0.00495018	+	0.0107092	+	20.9015	20.5048	20.6847	20.9545	20.9632	20.2514	20.4477	20.136	19.7588	20.4386	2	2	2	6	6	6	50.964	0	2.9802	50506000	14	20.6549	21.0172	21.0325	19.2549	20.8059	21.4536	20.7193	20.5185	20.8164	20.8884	21.5271	20.4481	20.994	20.972	20.9236	NaN	NaN	20.2514	20.0455	20.569
Q8K2B3	Succinate dehydrogenase [ubiquinone] flavoprotein subunit, mitochondrial	Sdha	0.466009	1.48068	0.0330612	+	0.0389423	+	24.3082	23.5849	24.4446	24.5006	24.2844	23.9905	23.6353	23.584	23.7173	23.8654	10	10	10	19.9	19.9	19.9	72.585	0	35.132	532150000	46	24.7313	23.9496	24.2437	24.0675	23.1607	23.5264	24.4973	24.1848	24.6516	24.4496	24.5891	24.463	24.4243	24.3724	24.0564	23.8531	23.7654	24.3529	23.6881	23.8099
Q9CQA3	Succinate dehydrogenase [ubiquinone] iron-sulfur subunit, mitochondrial	Sdhb	0.407006	2.42978	0.00371722	+	0.0177719	+	23.5665	24.0952	23.7862	23.6397	23.6386	23.2735	23.4628	23.2832	23.3608	23.3109	7	7	7	28	28	28	31.814	0	23.433	393270000	95	23.5365	23.5537	23.6093	24.2348	24.0855	23.9654	23.6568	23.8018	23.9	23.6657	23.6524	23.601	23.5047	23.769	23.6422	23.335	23.4764	23.0091	23.3468	23.5821
A2A6U3;Q80UG5-3;Q80UG5;Q80UG5-2	Septin-9	Sept9	-0.401373	1.61535	0.0242464	+	0.0404384	+	24.6952	24.2262	24.5541	24.6399	24.6787	25.3039	25.0781	24.6545	24.7564	25.008	16	16	16	36.5	36.5	36.5	63.772	0	24.224	874910000	62	24.7785	24.6246	24.6824	25.0091	23.1187	24.5507	24.6098	24.5387	24.5139	24.5862	24.7542	24.5791	24.3346	24.7003	25.0014	25.2217	25.3331	25.3569	25.0842	25.2618
A0A0N4SV32;Q3UMP4;Q9CY58-3;Q9CY58-2;Q9CY58;A0A0N4SUQ1;A0A0N4SUN8;A0A0N4SWH2;Q9CY58-4	Plasminogen activator inhibitor 1 RNA-binding protein	Serbp1	-1.32267	3.98276	0.000104051	+	0.000275862	+	19.3525	19.4053	19.4171	19.4724	19.7199	20.3423	20.4936	20.7593	21.2204	21.165	2	2	2	6.6	6.6	6.6	39.644	0	2.5693	36205000	6	19.9668	18.9799	19.1109	19.4053	NaN	NaN	19.4171	NaN	NaN	NaN	19.4724	NaN	19.5118	20.2113	19.4365	21.6109	18.0346	21.3814	21.1057	20.5056
Q9D154	Leukocyte elastase inhibitor A	Serpinb1a	-0.488831	2.37953	0.0041732	+	0.0129483	+	19.4816	19.6538	19.4874	19.378	19.4418	20.1798	20.3048	19.8373	19.8802	19.6848	2	2	2	6.1	6.1	6.1	42.574	0.0052562	1.6474	22150000	2	19.2743	19.6166	19.5538	19.565	19.7426	NaN	NaN	19.4605	19.5143	19.1696	19.5283	19.4361	19.0728	19.6641	19.5885	19.8542	20.1313	20.5537	20.7598	NaN
O08797		Serpinb9	-0.591305	2.08069	0.00830445	+	0.0129908	+	22.1483	21.5719	21.6094	21.4647	21.7253	22.6727	22.3377	22.0586	22.4016	22.0056	7	7	7	20.3	20.3	20.3	42.259	0	12.55	129170000	36	22.3305	22.0206	22.0938	21.2264	21.801	21.6883	21.7023	21.2183	21.9076	21.588	21.5904	21.2157	21.6406	21.8565	21.6788	22.7919	22.5742	22.6519	22.2192	22.4093
Q921M3;Q921M3-2	Splicing factor 3B subunit 3	Sf3b3	0.335624	3.77982	0.000166027	+	0.0128846	+	25.8884	25.8285	25.6329	25.7865	25.7812	25.3986	25.5332	25.4894	25.384	25.4341	28	28	28	30.6	30.6	30.6	135.55	0	144.01	1642800000	270	25.8304	25.8511	25.9839	25.8741	25.8518	25.7595	25.5018	25.7236	25.6733	25.8375	25.7597	25.7622	25.7669	25.8284	25.7481	25.3762	25.4764	25.3431	25.4066	25.6074
Q8QZY9	Splicing factor 3B subunit 4	Sf3b4	0.32773	5.11611	7.65411e-06	+	0.00748971	+	21.9006	21.8981	21.8669	21.842	21.8721	21.6637	21.5255	21.5494	21.5127	21.4897	4	4	3	15.3	15.3	13.4	44.355	0	6.5008	108230000	11	21.9049	22.0151	21.7819	21.8927	21.8725	21.929	21.8516	21.9582	21.7909	21.8432	21.864	21.8187	21.7826	21.8729	21.9609	21.6621	21.7759	21.5532	21.7432	21.3953
A0A1W2P7L7;P59708	Splicing factor 3B subunit 6	Sf3b6	0.417777	2.10642	0.0078268	+	0.0223398	+	22.8375	22.6295	22.4962	22.4809	22.3618	21.9375	22.2505	22.1707	22.3946	21.9636	4	4	4	45.9	45.9	45.9	13.037	0	8.8918	169430000	42	22.4193	23.0994	22.9937	22.8773	22.7988	22.2124	22.5731	22.316	22.5994	22.3047	22.704	22.4341	22.52	22.4828	22.0825	21.6537	21.9062	22.2526	21.8648	22.3798
Q3U4F0;Q91V61-2;Q91V61	Sideroflexin-3	Sfxn3	1.45109	3.9833	0.000103921	+	0.0004	+	20.6227	20.7487	21.1937	21.4277	20.5362	19.4513	19.1252	19.6132	19.3249	19.7591	2	2	2	7.8	7.8	7.8	30.951	0	2.2176	39071000	9	20.2149	20.8405	20.8128	20.6308	20.8667	NaN	21.3366	21.4601	20.7844	21.2361	21.3005	21.7464	20.9073	20.4209	20.2804	19.0772	NaN	19.8253	19.2031	18.8283
Q91VW3;I7HPY0	SH3 domain-binding glutamic acid-rich-like protein 3	Sh3bgrl3	0.978603	3.09498	0.000803559	+	0.00168182	+	25.2226	24.6465	24.965	25.1104	25.1301	24.0979	24.5477	24.056	23.9107	23.5694	2	2	2	32.3	32.3	32.3	10.477	0	22.237	870010000	18	24.9457	25.75	24.9722	24.9854	24.5463	24.4079	25.4143	24.4502	25.0307	24.8954	25.1502	25.2857	25.6913	24.9204	24.7784	24.1882	24.0986	24.0068	25.2915	24.2308
E9Q0C1;Q8R550-3;Q8R550-2;Q8R550;Q8R550-5;Q8R550-4	SH3 domain-containing kinase-binding protein 1	Sh3kbp1	0.419973	3.67267	0.000212488	+	0.006837	+	21.6276	21.6593	21.4075	21.559	21.5727	21.2262	20.9527	21.1987	21.1926	21.156	3	3	3	9.6	9.6	9.6	49.383	0	3.762	79001000	16	21.6704	21.3907	21.8215	22.2474	21.4326	21.298	21.2228	21.2836	21.7162	21.5867	21.6623	21.428	21.7826	21.6598	21.2755	NaN	21.2185	21.2339	20.6624	20.9868
P50431;G3UZ26;G3UYY1	Serine hydroxymethyltransferase, cytosolic;Serine hydroxymethyltransferase	Shmt1	-0.378963	4.41915	3.80935e-05	+	0.00642254	+	22.7669	22.8796	22.8411	22.7892	22.6613	23.2659	23.1734	23.0998	23.1336	23.1603	10	9	9	30.1	27.2	27.2	52.6	0	13.077	244460000	52	22.663	22.7236	22.9142	22.9515	23.0345	22.6528	22.9241	22.7316	22.8677	22.925	22.6862	22.7563	22.7247	22.6286	22.6307	23.1349	23.4192	23.2436	23.2304	23.1802
Q8BH59	Calcium-binding mitochondrial carrier protein Aralar1	Slc25a12	0.419381	1.76802	0.0170601	+	0.032188	+	20.9001	21.2214	21.5071	21.1899	20.9483	20.4809	20.6967	20.974	20.6385	20.8799	5	5	5	9.6	9.6	9.6	74.569	0	6.1518	61338000	15	21.0916	20.8882	20.7204	21.13	21.5775	20.9567	21.5708	21.5964	21.354	20.9219	21.3684	21.2795	21.0429	20.9536	20.8485	20.7581	20.491	20.1935	20.7949	20.6775
Q8BMD8	Calcium-binding mitochondrial carrier protein SCaMC-1	Slc25a24	1.03291	3.7804	0.000165805	+	0.000581818	+	NaN	NaN	19.5362	19.8541	19.5801	18.5463	18.6026	18.7723	18.5743	NaN	1	1	1	2.7	2.7	2.7	52.901	0.0052701	1.6606	7906900	5	NaN	NaN	NaN	NaN	NaN	NaN	19.5362	NaN	NaN	19.6544	19.7405	20.1674	19.5801	NaN	NaN	NaN	18.5463	NaN	NaN	18.3996
P17809	Solute carrier family 2, facilitated glucose transporter member 1	Slc2a1	-0.538393	2.91297	0.00122188	+	0.00685455	+	21.36	21.6368	21.7023	21.7648	21.3165	22.1441	22.0215	22.0262	21.968	22.3125	2	2	2	5.1	5.1	5.1	53.984	0	48.639	122880000	8	21.7569	20.5658	21.7572	21.7304	22.014	21.1659	21.5658	21.777	21.7639	21.1014	NaN	22.4282	21.5287	21.8144	20.6063	21.9628	22.15	22.3195	21.9776	22.1296
P10852;P10852-2;A0A0U1RP98	4F2 cell-surface antigen heavy chain	Slc3a2	-0.529035	2.04155	0.00908763	+	0.0160994	+	24.148	24.7268	24.8922	24.8065	24.7303	25.2822	24.9781	25.3801	25.0137	25.2947	13	13	13	25.7	25.7	25.7	58.336	0	51.425	992880000	74	24.8725	23.2529	24.3185	24.7689	24.9238	24.4878	24.8776	24.9769	24.8221	24.673	24.7211	25.0253	24.9231	24.6262	24.6415	25.2126	25.3387	25.2955	25.8893	23.8443
Q9Z127	Large neutral amino acids transporter small subunit 1	Slc7a5	-1.06375	1.55524	0.0278457	+	0.0142558	+	22.683	23.0533	21.5913	23.4415	22.4619	23.1437	24.6224	23.6631	23.5641	23.5564	4	4	4	18.9	18.9	18.9	55.872	0	323.31	351050000	28	22.4488	22.8161	22.7842	23.5018	22.8265	22.8316	22.0933	19.4649	23.2157	23.8076	22.4358	24.0809	22.6197	22.7058	22.0601	22.8157	23.5904	23.025	24.0463	24.7974
P70441	Na(+)/H(+) exchange regulatory cofactor NHE-RF1	Slc9a3r1	0.442297	1.61651	0.0241821	+	0.0356124	+	22.4466	21.9759	22.1484	22.4137	22.3782	21.4592	21.6303	21.9831	21.8726	22.206	7	7	7	27.3	27.3	27.3	38.6	0	8.2871	130290000	18	22.5621	22.2674	22.5102	22.162	21.6773	22.0885	22.3069	21.9898	NaN	22.0755	22.7984	22.3672	22.6742	22.0835	22.3769	21.6061	20.8157	21.9558	21.4853	21.7016
Q91ZW3	SWI/SNF-related matrix-associated actin-dependent regulator of chromatin subfamily A member 5	Smarca5	-0.494124	1.39206	0.0405456	+	0.0411128	+	19.9359	19.0983	19.7882	19.4638	19.6188	20.4347	20.2013	19.5936	19.9593	20.1866	3	3	3	3	3	3	121.63	0	3.3283	23649000	8	19.9359	NaN	NaN	19.6589	17.7496	19.8863	19.9268	19.8083	19.6295	NaN	19.5402	19.3874	19.5795	19.6582	NaN	20.3849	20.4845	NaN	20.8538	19.843
F6U415;Q9Z0H3-2;Q9Z0H3	SWI/SNF-related matrix-associated actin-dependent regulator of chromatin subfamily B member 1	Smarcb1	0.367378	2.00526	0.00987962	+	0.0309501	+	19.951	19.5009	19.5012	NaN	19.5036	19.2679	19.1471	19.2752	19.2135	19.3302	1	1	1	23.6	23.6	23.6	6.0395	0.0020994	1.8792	13472000	1	19.479	19.3527	21.0213	19.5009	NaN	NaN	NaN	19.5483	19.454	NaN	NaN	NaN	19.4298	19.5774	NaN	19.2679	NaN	NaN	NaN	NaN
Q3UNN4;P97496-2;P97496;Q3UZD0	SWI/SNF complex subunit SMARCC1	Smarcc1	0.714454	2.16012	0.00691643	+	0.00880297	+	22.7084	22.4006	22.5616	23.0513	22.4401	21.2929	22.0672	21.9636	22.1459	22.1201	7	7	6	10.8	10.8	10	122.78	0	41.701	167840000	41	22.6144	23.0625	22.4483	22.4129	22.3389	22.4499	22.5001	22.087	23.0976	22.5377	23.7907	22.8254	22.3429	22.6676	22.3098	21.3369	20.799	21.7428	20.4272	23.1853
Q3UID0;Q6PDG5-2;Q6PDG5	SWI/SNF complex subunit SMARCC2	Smarcc2	0.486949	2.16759	0.00679842	+	0.0161873	+	20.9113	21.5313	21.3797	21.6318	21.2473	20.9342	20.9571	20.8768	20.6903	20.8082	4	3	3	3.8	3	3	124.68	0	16.524	74812000	13	21.396	20.2989	21.0389	21.521	21.6501	21.4228	21.3905	21.5031	21.2457	21.7072	21.8742	21.3141	21.2864	21.4017	21.0537	21.1013	20.9284	20.7731	20.8891	21.2484
O54941	SWI/SNF-related matrix-associated actin-dependent regulator of chromatin subfamily E member 1	Smarce1	0.489495	2.54903	0.00282468	+	0.0117475	+	21.5708	22.0565	21.7715	22.0063	21.7926	21.1594	21.2559	21.5188	21.2818	21.5342	4	4	4	19	19	19	46.638	0	13.725	103450000	33	21.8646	20.7853	22.0623	21.7976	22.1027	22.2691	21.5955	21.841	21.8781	22.0711	22.1134	21.8342	21.7399	21.8577	21.7803	21.4773	21.1011	20.8998	20.9122	21.3803
Q8CG48	Structural maintenance of chromosomes protein 2	Smc2	0.31185	2.49571	0.00319369	+	0.0300221	+	24.5535	24.5801	24.2882	24.4377	24.3867	24.2855	23.9923	24.1062	24.0793	24.2238	24	24	24	24.1	24.1	24.1	134.24	0	109.85	645560000	132	24.3797	24.5803	24.7004	24.5433	24.7321	24.4649	24.2224	24.1677	24.4747	24.3351	24.4169	24.5612	24.3537	24.3527	24.4538	24.2334	24.3248	24.2982	24.1218	24.0258
Q9CW03	Structural maintenance of chromosomes protein 3	Smc3	0.451609	2.62762	0.00235712	+	0.0128254	+	23.2994	23.0296	22.997	23.2577	22.8884	22.8788	22.6351	22.6235	22.6091	22.4674	13	13	13	14.5	14.5	14.5	141.55	0	40.43	243630000	52	23.1107	23.5393	23.2482	23.2954	23.2679	22.5254	23.107	23.128	22.7559	23.152	23.1388	23.4823	22.8599	22.9173	22.888	22.6017	22.8507	23.1842	22.5665	22.6219
E9Q2X6;Q8CG47	Structural maintenance of chromosomes protein;Structural maintenance of chromosomes protein 4	Smc4	-0.693217	1.38402	0.0413033	+	0.0292944	+	20.2818	20.4049	20.9976	20.9318	20.9057	21.8376	22.0929	21.1197	20.7936	21.1443	7	7	7	5.5	5.5	5.5	144.21	0	6.6889	69777000	12	20.9472	19.9386	19.9597	21.0172	19.443	20.7547	21.3099	21.1218	20.5611	21.0073	20.7849	21.0033	20.9245	20.9423	20.8505	NaN	22.4583	21.217	21.1513	21.7969
Q6P5D8	Structural maintenance of chromosomes flexible hinge domain-containing protein 1	Smchd1	-0.313877	2.06224	0.00866478	+	0.0401807	+	21.6594	21.7585	21.6157	21.522	21.5689	21.9012	21.7307	22.2099	22.0094	21.8426	9	9	9	6.1	6.1	6.1	225.65	0	10.153	107930000	33	21.7428	21.6706	21.5647	21.5482	21.6772	22.0503	21.5468	21.8463	21.454	21.3692	21.5632	21.6336	21.7907	21.4542	21.4617	21.819	22.0367	21.8478	21.7321	21.8977
Q3UKJ7;Q3UKJ7-2	WD40 repeat-containing protein SMU1;WD40 repeat-containing protein SMU1, N-terminally processed	Smu1	0.719083	1.99011	0.0102303	+	0.0117027	+	23.3509	23.3542	23.2659	23.3962	23.0705	22.91	22.7795	22.7943	22.594	21.7645	9	9	9	22.8	22.8	22.8	57.543	0	232	263830000	52	23.2505	23.276	23.5261	23.8797	23.1914	22.9915	22.8569	23.6331	23.3076	23.7778	23.4087	23.0021	23.0266	23.1723	23.0127	23.0597	22.7119	22.9586	22.3258	23.0434
Q78PY7;Q3TJ56	Staphylococcal nuclease domain-containing protein 1	Snd1	-0.672282	6.73314	1.84868e-07	+	0.000444444	+	24.0908	23.8915	24.036	24.0012	23.9358	24.6956	24.651	24.724	24.6303	24.6158	15	15	15	21.4	21.4	21.4	102.09	0	17.325	652330000	86	23.9898	24.1516	24.131	23.7509	23.9389	23.9847	24.0138	23.9547	24.1395	23.997	23.8544	24.1522	23.8934	24.0849	23.829	24.5012	24.8932	24.6923	24.5816	24.7002
A0A3B2W450;A0A3B2WCR6;Q62241	U1 small nuclear ribonucleoprotein C	Snrpc	1.03412	1.42443	0.0376333	+	0.0183876	+	21.7792	21.3673	21.7474	22.466	21.772	20.9478	21.0095	21.3893	19.3261	21.2885	2	2	2	13.4	13.4	13.4	17.042	0	4.7343	84781000	7	20.731	21.8051	22.8015	NaN	21.1874	21.5472	22.3813	21.9103	20.9505	22.4198	23.3473	21.6309	NaN	NaN	21.772	21.724	22.0406	19.079	21.446	20.7131
P62307	Small nuclear ribonucleoprotein F	Snrpf	0.372458	2.03884	0.00914451	+	0.0300265	+	23.5067	23.934	24.0466	23.7643	23.7534	23.6187	23.3363	23.2942	23.5023	23.3914	4	4	4	73.3	73.3	73.3	9.7251	0	17.583	390350000	26	23.4243	23.4643	23.6316	23.7765	24.0523	23.9733	24.2876	24.0012	23.8512	23.7542	23.5966	23.9422	23.68	23.8564	23.7237	23.7381	23.6259	23.492	23.2384	23.8432
Q9D8U8	Sorting nexin-5	Snx5	-0.347634	2.56648	0.00271342	+	0.0220976	+	21.645	21.9074	21.7426	21.5678	21.6613	22.2596	21.9765	21.9511	22.0935	21.9818	6	6	6	17.1	17.1	17.1	46.797	0	6.1259	118510000	51	21.8901	21.6984	21.3466	22.108	21.8388	21.7755	21.5229	21.9649	21.7402	21.6118	21.4913	21.6003	21.7446	21.6909	21.5485	22.247	22.3445	22.1873	22.0057	22.0701
Q8C405;F6WL90;A0A1B0GX24;E9QA05;O35892-2;O35892	Nuclear autoantigen Sp-100	Sp100	1.46927	3.09579	0.00080207	+	0.000645161	+	21.3378	21.1903	21.1262	21.4016	19.9157	19.2992	19.6232	19.5025	19.5337	19.6665	3	3	3	6.4	6.4	6.4	68.123	0	3.8613	48318000	11	20.7685	21.6134	21.6313	20.8196	21.4641	21.2871	21.4686	20.3279	21.5821	20.7726	21.509	21.9231	20.5157	20.9526	18.2789	19.2279	19.7387	18.9308	19.6737	19.6224
Q8BVK9	Sp110 nuclear body protein	Sp110	0.644016	3.26407	0.000544419	+	0.00337838	+	23.5745	23.998	23.923	23.5843	23.9155	22.9023	23.3507	23.1723	23.2024	23.1474	5	5	5	25.6	25.6	25.6	50.14	0	76.815	484210000	49	23.3705	23.7229	23.6302	24.4005	24.0319	23.5616	24.0057	23.9547	23.8085	23.5857	23.5314	23.6358	24.0464	23.643	24.0571	22.8857	23.0565	22.7646	23.6821	23.478
A3KGU7;A3KGU9;P16546;A3KGU5;E9Q447;P16546-2	Spectrin alpha chain, non-erythrocytic 1	Sptan1	0.713424	4.91974	1.20299e-05	+	0.000603774	+	25.2831	25.3603	25.0053	25.1926	25.2587	24.6373	24.4362	24.5482	24.3821	24.5291	34	34	34	18.4	18.4	18.4	285.15	0	38.626	968360000	140	25.143	25.3095	25.3969	25.4448	25.5107	25.1253	25.348	25.2429	24.425	25.1148	25.1551	25.308	25.2168	25.16	25.3993	24.6814	24.5819	24.6488	24.5826	24.298
Q62261;A0A0A0MQG2;Q62261-2	Spectrin beta chain, non-erythrocytic 1	Sptbn1	0.668372	5.3413	4.55723e-06	+	0.00064	+	25.6944	25.6779	25.6698	25.5941	25.6675	25.0915	24.8863	24.9823	24.8454	25.1565	46	46	45	25.2	25.2	24.8	274.22	0	66.655	1327300000	214	25.6321	25.6593	25.7917	25.409	25.8422	25.7823	25.716	25.6683	25.6251	25.586	25.4989	25.6975	25.6073	25.7057	25.6895	25.0212	25.1312	25.122	24.9156	24.9047
Q6P069-2;Q6P069	Sorcin	Sri	1.04051	2.08131	0.0082925	+	0.00618009	+	23.6505	23.6827	23.0301	23.4666	23.0552	22.6622	21.776	21.6307	22.9178	22.6959	5	5	5	29	29	29	20.296	0	27.904	280800000	18	23.732	23.8056	23.4139	23.9437	23.7126	23.3919	22.8832	23.2423	22.9647	23.4917	23.9173	22.9909	22.9603	23.0202	23.1852	22.377	22.6508	22.959	19.2199	22.8397
Q64674	Spermidine synthase	Srm	-0.619974	5.8341	1.46522e-06	+	0.000666667	+	23.5877	23.3958	23.4294	23.4296	23.4511	24.1685	23.9828	24.1287	24.0054	24.108	8	8	8	37.1	37.1	37.1	33.995	0	27.464	439200000	49	23.6301	23.5053	23.6276	23.6969	22.8532	23.6374	23.2413	23.5046	23.5422	23.4251	23.4376	23.4261	23.1838	23.5471	23.6225	24.2205	24.3245	23.9604	24.1581	24.1356
P16254;A2AUM6	Signal recognition particle 14 kDa protein;Signal recognition particle 14 kDa protein, N-terminally processed	Srp14	-0.366562	2.49117	0.00322725	+	0.0207	+	21.5795	21.3196	21.1426	21.3982	21.2123	21.5654	21.6513	21.7651	21.8235	21.6797	2	2	2	21.8	21.8	21.8	12.51	0	5.9647	83276000	17	21.6039	21.5616	21.573	21.3852	21.2306	21.3429	20.8854	21.0562	21.4861	21.3461	21.4504	NaN	21.2636	21.161	NaN	21.8061	21.7323	21.1578	21.4103	21.8747
Q8BTI8-3;Q8BTI8-2;Q8BTI8	Serine/arginine repetitive matrix protein 2	Srrm2	0.339424	1.69225	0.0203117	+	0.0497028	+	23.1802	23.1882	22.9164	23.267	23.1765	23.1066	22.7057	22.6975	22.5497	22.9717	11	11	11	6.4	6.4	6.4	285.15	0	15.26	254580000	59	23.3832	23.2953	22.8621	23.1972	23.2503	23.1171	23.5255	22.9736	22.2502	23.0325	23.512	23.2564	23.2005	23.0994	23.2297	23.5069	22.67	23.143	23.1999	22.3907
Q99MR6-3;Q99MR6-4;Q99MR6-2;Q99MR6;A0A0G2JDF8	Serrate RNA effector molecule homolog	Srrt	0.476898	2.30655	0.00493688	+	0.0146859	+	23.0017	23.3635	23.2773	23.1385	22.9368	22.8669	22.3277	22.6421	22.8196	22.6769	8	8	8	9.7	9.7	9.7	99.438	0	7.3964	242040000	37	22.754	23.2283	23.0229	23.4246	23.4394	23.2266	23.2266	23.3506	23.2547	22.8035	23.3535	23.2584	23.0163	22.8629	22.931	22.8038	23.0618	22.735	22.7438	22.5023
Q3TFP0;Q9R0U0-3;Q9R0U0-2;Q9R0U0	Serine/arginine-rich splicing factor 10	Srsf10	1.04261	2.35958	0.00436937	+	0.00383333	+	22.9202	21.8258	21.8556	22.6055	22.7526	21.4596	21.147	21.6742	21.5161	20.9497	3	3	3	28	28	28	22.135	0	3.8791	133110000	8	22.4723	23.1742	23.1141	21.9374	NaN	21.7141	21.6057	21.9814	21.9797	22.2781	22.7259	22.8125	22.3932	22.0916	23.773	21.5107	21.4012	21.4668	20.4258	20.5466
Q542V3;Q8VE97	Serine/arginine-rich splicing factor 4	Srsf4	0.42998	2.80953	0.0015505	+	0.0123506	+	20.2148	20.0477	19.8438	19.9827	20.2358	19.6634	19.7881	19.5907	19.6769	19.4558	4	1	1	8.6	2.9	2.9	56.248	0.0040678	1.7398	29659000	7	20.0344	20.1435	20.4666	20.0548	20.1047	19.9836	19.5353	19.8843	20.1117	19.9956	20.1737	19.7789	19.8423	20.5155	20.3496	19.5193	20.0607	19.4104	19.5346	19.6804
Q3TWW8	Serine/arginine-rich splicing factor 6	Srsf6	0.430621	1.45022	0.0354635	+	0.0458908	+	24.0363	23.9564	23.9784	23.939	24.005	23.7515	23.8159	22.9009	23.5378	23.7559	6	6	3	21.2	21.2	13	39.025	0	12.478	454690000	28	24.2427	24.0426	23.8236	23.795	23.9403	24.1338	24.0733	24.043	23.819	23.8932	24.017	23.9067	24.6807	23.8992	23.4352	23.397	23.5052	24.3523	23.3533	24.4144
A2AW05;Q08943;Q08943-2	FACT complex subunit SSRP1	Ssrp1	0.483682	5.03206	9.28842e-06	+	0.00223077	+	25.1286	25.0593	24.9217	25.0135	25.0282	24.491	24.6587	24.5964	24.4656	24.5211	13	13	13	25	25	25	71.527	0	118.06	926780000	139	25.087	25.1321	25.1668	24.93	25.0907	25.1571	24.7678	24.8763	25.121	24.9914	25.0198	25.0293	24.9999	25.0127	25.072	24.572	24.5497	24.3513	24.7483	24.6125
Q9Z2I9	Succinyl-CoA ligase [ADP-forming] subunit beta, mitochondrial	Sucla2	0.525974	1.52912	0.0295719	+	0.0311416	+	22.0964	22.0389	22.4311	22.4227	21.5506	21.84	21.8475	21.517	21.2376	21.4677	4	4	4	13	13	13	50.113	0	4.2695	120500000	14	22.2318	21.8845	22.173	21.9187	22.229	21.9691	22.7913	22.486	22.0159	22.5146	22.1265	22.6271	22.1657	21.7153	20.7707	22.0323	22.1114	21.3763	21.8889	22.055
Q9Z2I8-2;Q9Z2I8	Succinyl-CoA ligase [GDP-forming] subunit beta, mitochondrial	Suclg2	0.469971	2.33887	0.00458279	+	0.0146127	+	21.5654	21.21	21.3605	21.4423	21.4739	20.9152	21.1554	20.5545	21.0861	20.991	4	4	4	12.8	12.8	12.8	41.349	0	4.431	74191000	24	21.3307	21.5572	21.8083	21.3893	21.4791	20.7617	21.2365	21.355	21.4898	22.3818	21.4181	20.5269	21.5261	21.4485	21.447	20.7297	20.6824	21.3334	21.3953	NaN
P63166	Small ubiquitin-related modifier 1	Sumo1	0.478793	2.36648	0.00430048	+	0.0137738	+	22.169	22.2523	22.0923	22.0492	22.2842	21.8871	21.6934	21.7463	21.2625	21.8639	2	2	2	20.8	20.8	20.8	11.557	0.0077121	1.5441	119200000	3	22.1857	22.4893	21.832	NaN	22.2027	22.3018	22.0724	22.142	22.0626	21.9683	22.0528	22.1266	22.5672	22.1291	22.1563	21.8631	21.9403	21.8578	21.7812	21.5446
G3X956;Q920B9	FACT complex subunit SPT16	Supt16;Supt16h	0.382366	4.86157	1.3754e-05	+	0.0051875	+	24.6788	24.7003	24.6384	24.6192	24.6532	24.3956	24.2355	24.3205	24.1722	24.2543	18	18	18	20.8	20.8	20.8	119.84	0	98.915	721600000	172	24.5042	24.6619	24.8703	24.7084	24.6632	24.7294	24.7301	24.5621	24.6229	24.4879	24.5994	24.7703	24.6455	24.6956	24.6186	24.1849	24.6246	24.3774	24.3305	24.3008
F8WJD4;Q80X82;D3Z2M2;S4R2Q3	Symplekin	Sympk	0.366167	1.62515	0.0237057	+	0.0468529	+	20.1931	19.9468	19.9567	20.1877	20.5241	19.8145	19.7525	19.6148	19.713	20.0829	2	2	2	3.1	3.1	3.1	142.62	0	2.5853	25132000	4	20.1696	NaN	20.2167	20.1188	20.0401	19.6815	NaN	NaN	19.9567	20.0722	20.5211	19.9697	20.3406	20.7077	NaN	19.8682	19.7913	19.784	18.9722	20.143
G3UZI2;A0A0R4J259;G3V018;Q7TMK9-2;Q7TMK9;G3UXJ6;G3UZ48	Heterogeneous nuclear ribonucleoprotein Q	Syncrip	-1.07061	2.82153	0.00150823	+	0.00236735	+	23.0589	22.6647	22.9504	23.6657	22.7648	24.5056	24.0057	23.6225	24.1031	24.2207	11	11	7	24.9	24.9	16.7	58.751	0	13.943	410440000	42	22.8695	23.2085	23.0989	23.0635	22.9093	22.0213	22.9959	23.1883	22.667	23.5702	23.7629	23.6639	22.0999	22.6691	23.5253	24.5698	24.5501	24.3969	23.895	23.9445
Q9D0R2	Threonine--tRNA ligase, cytoplasmic	Tars	-0.796884	5.11923	7.59917e-06	+	0.000571429	+	22.8017	22.4728	22.6359	22.6288	22.5419	23.5307	23.2912	23.5039	23.266	23.4737	8	8	8	14.1	14.1	14.1	83.355	0	11.999	259110000	62	22.7877	22.7754	22.8421	22.4925	22.3664	22.5594	22.5101	22.7212	22.6763	22.7723	22.5339	22.5802	22.7308	22.525	22.3699	23.6696	23.4392	23.4833	23.3144	23.1324
Q8BHJ5;A0A0J9YV90;Q9QXE7	F-box-like/WD repeat-containing protein TBL1XR1;F-box-like/WD repeat-containing protein TBL1X	Tbl1xr1;Tbl1x	0.687007	2.69067	0.00203858	+	0.00516062	+	21.3767	21.6042	21.3018	21.4962	21.2507	21.2418	20.7147	20.6495	20.552	20.4366	3	3	3	8.4	8.4	8.4	55.66	0	4.9883	69416000	9	21.8552	21.3216	20.9534	21.8754	21.5552	21.3818	21.6137	21.0588	21.233	21.1747	21.7588	21.5552	21.5961	20.9054	NaN	20.9798	21.2666	21.4789	20.6994	20.6298
Q3ULB1;Q921W7;P47226-2;P47226	Testin	Tes	-0.6477	5.11474	7.67813e-06	+	0.000542373	+	21.9431	22.0158	21.9328	22.0263	21.8466	22.7814	22.4915	22.507	22.6704	22.5528	7	7	7	24.9	24.9	24.9	46.586	0	7.023	157590000	25	21.9408	21.8371	22.0515	22.2854	22.072	21.69	22.1726	21.6483	21.9775	21.9088	21.8922	22.2778	21.7398	21.9963	21.8036	22.6528	22.8334	22.8581	22.6244	22.4279
Q62351;Q8C872	Transferrin receptor protein 1	Tfrc	-0.820805	6.2869	5.16536e-07	+	0	+	24.341	24.4337	24.4411	24.5397	24.4518	25.4495	25.2208	25.2142	25.1933	25.2335	15	15	15	25.2	25.2	25.2	85.73	0	32.429	964820000	109	24.3049	24.3288	24.3892	24.4656	24.2577	24.5779	24.5403	24.4187	24.3644	24.4369	24.3129	24.8695	24.526	24.3831	24.4463	25.4019	25.561	25.3856	25.3789	25.1189
P21981	Protein-glutamine gamma-glutamyltransferase 2	Tgm2	-0.61852	2.39451	0.00403168	+	0.00789354	+	19.9715	20.0994	19.9309	19.9332	19.5722	20.8395	20.1051	20.4813	20.4409	20.7329	3	3	3	5.4	5.4	5.4	77.06	0	3.0614	33191000	12	19.7485	20.0356	20.1303	20.0378	20.2382	20.0223	20.1112	19.8864	19.7951	19.6807	NaN	20.1857	NaN	NaN	19.5722	20.9759	20.9921	20.5507	20.2876	19.8987
Q8BZN7;Q569Z6	Thyroid hormone receptor-associated protein 3	Thrap3	0.564824	4.1698	6.76393e-05	+	0.00239252	+	21.2025	21.3596	21.1947	21.2658	21.2539	20.6924	20.5098	20.8267	20.565	20.8587	2	2	2	3.5	3.5	3.5	80.11	0	3.0539	66554000	28	21.1543	21.0622	21.3911	21.3554	21.3288	21.3946	21.4912	21.0682	21.0249	21.333	20.8919	21.5725	21.2506	21.221	21.2902	20.8337	20.8821	20.3613	20.7196	19.9965
P01831;A0A1L1SUX8	Thy-1 membrane glycoprotein	Thy1	0.405822	3.28518	0.00051858	+	0.0102079	+	27.7084	27.8544	27.6494	27.4625	27.6026	27.3474	27.1647	27.253	27.1859	27.2971	6	6	6	37.7	37.7	37.7	18.08	0	323.31	5510100000	120	27.6726	27.6933	27.7593	27.7556	27.9576	27.8498	27.5136	27.7804	27.6542	27.3792	27.3815	27.6267	27.5746	27.6848	27.5483	27.3362	27.4558	27.2502	27.46	27.1081
P58021	Transmembrane 9 superfamily member 2	Tm9sf2	0.371153	1.64118	0.0228463	+	0.0452524	+	21.7485	21.6226	21.5834	22.1596	21.4569	21.1446	21.4568	21.4145	21.3422	21.3573	3	3	3	6.3	6.3	6.3	75.329	0	3.2661	103020000	6	21.5941	21.5019	22.1495	21.6631	21.6393	21.5653	21.5031	21.7125	21.5345	21.9673	22.0291	22.4826	21.6438	21.4376	21.2892	21.2249	20.8058	21.4031	21.5504	21.4745
Q01320	DNA topoisomerase 2-alpha	Top2a	-0.906564	4.50137	3.15234e-05	+	0.000615385	+	21.1481	20.8756	20.8024	20.8483	20.8117	21.7632	21.7279	21.6415	22.1432	21.7432	6	6	6	4.5	4.5	4.5	172.79	0	8.323	84345000	32	20.9208	21.0171	21.5065	20.6768	21.0332	20.9168	20.7467	20.5503	21.1103	21.0457	20.6047	20.8945	20.7493	21.012	20.674	21.9441	21.5399	21.8057	21.752	21.6707
Q6IRU2	Tropomyosin alpha-4 chain	Tpm4	0.302448	3.48319	0.000328704	+	0.0184648	+	24.8069	24.8174	24.6677	24.7628	24.8227	24.6056	24.4259	24.3966	24.5343	24.4028	8	7	6	35.1	32.3	28.6	28.467	0	83.064	781620000	61	24.7158	24.8061	24.8989	24.7566	24.7275	24.968	24.6309	24.5789	24.7934	24.5232	24.6666	25.0985	24.7231	24.7895	24.9554	24.7254	24.516	24.5755	24.5077	24.3306
Q7M739;F6ZDS4	Nucleoprotein TPR	Tpr	0.378753	2.63463	0.00231936	+	0.0175745	+	24.6438	24.5079	24.5716	24.5554	24.5736	24.3487	24.3578	23.9034	24.1329	24.2156	23	23	23	12.7	12.7	12.7	266.92	0	63.721	675950000	139	24.5801	24.7673	24.584	24.4569	24.8308	24.2359	24.579	24.4828	24.653	24.615	24.4999	24.5512	24.5292	24.6327	24.5588	24.4012	24.3553	24.2897	24.3268	24.4796
F8WJG3;P62996	Transformer-2 protein homolog beta	Tra2b	0.428231	2.36069	0.00435824	+	0.0170645	+	23.9048	23.8621	23.6655	23.7728	23.8495	23.5046	23.6623	23.3561	23.3332	23.0574	5	5	5	34.6	34.6	34.6	21.935	0	21.727	400400000	77	23.7291	24.0271	23.9583	23.9435	23.7748	23.868	23.73	23.5475	23.7191	23.812	23.8131	23.6933	23.7642	23.9477	23.8366	23.864	23.3262	23.3235	23.2833	23.8911
Q9CQN1	Heat shock protein 75 kDa, mitochondrial	Trap1	0.408794	1.72854	0.0186835	+	0.035375	+	22.9911	22.397	22.7042	22.9987	22.644	22.2339	22.6361	22.1735	22.3506	22.2969	10	10	10	17	17	17	80.208	0	12.423	188660000	26	22.9428	22.8786	23.152	21.7331	22.6908	22.7672	23.4922	22.3118	22.3087	22.9417	22.9374	23.1169	22.7806	22.4475	22.7037	22.0622	22.6939	21.9457	22.1069	23.2617
Q62318;Q62318-2	Transcription intermediary factor 1-beta	Trim28	0.260387	2.89565	0.0012716	+	0.0362218	+	25.3002	25.2831	25.186	25.1818	25.3203	25.0686	25.0342	25.0668	24.9714	24.8284	18	18	18	33.6	33.6	33.6	88.846	0	36.239	1163400000	112	25.2464	25.3741	25.28	25.2162	25.4468	25.1862	25.249	25.1454	25.1637	25.1779	25.0926	25.2749	25.3269	25.3995	25.2346	25.055	25.221	24.9299	25.0461	24.972
Q922F4	Tubulin beta-6 chain	Tubb6	-0.542185	1.43066	0.0370974	+	0.0354179	+	20.3517	20.4047	20.4046	20.292	20.3659	21.2252	21.1395	20.8479	20.0877	21.2295	9	3	3	32.9	11.2	11.2	50.09	0	3.163	51321000	4	20.2841	NaN	20.4193	20.3176	20.4762	20.4203	20.0898	20.4443	20.6799	20.695	20.1958	19.9851	20.5358	20.2852	20.2766	21.4702	21.1948	21.0107	20.8868	20.6537
Q8BFR5;Q8BFR5-2	Elongation factor Tu, mitochondrial	Tufm	0.522269	2.42049	0.00379759	+	0.0118255	+	23.1429	23.0641	23.0237	23.3108	22.9398	22.539	22.7527	22.2816	22.9009	22.3958	11	11	11	29.9	29.9	29.9	49.508	0	14.536	245820000	70	23.1498	23.1512	23.1276	23.0702	23.0549	23.0674	23.0179	23.3822	22.6709	23.7598	22.9629	23.2096	22.9014	23.1915	22.7266	22.5365	22.2141	22.8662	22.9686	22.6331
Q8BG60-2;Q8BG60	Thioredoxin-interacting protein	Txnip	0.757005	2.59493	0.00254137	+	0.00460215	+	19.7457	19.8	19.8569	20.3241	19.6999	18.7585	19.4232	18.8659	19.367	19.227	3	3	3	9.6	9.6	9.6	44.291	0	3.3846	22663000	7	20.4651	19.1325	19.6396	19.7888	19.726	19.8852	19.9365	19.7744	19.8597	20.3264	20.3218	NaN	19.8427	20.1001	19.157	18.7707	18.4009	19.104	19.7243	NaN
Q3V3E1;D6RCF9	Ubiquitin-associated and SH3 domain-containing protein A	Ubash3a	0.542771	2.08545	0.00821394	+	0.0148309	+	20.4753	20.667	20.789	20.6035	20.8605	20.2885	20.3179	20.3245	20.1614	19.589	4	4	4	11.5	11.5	11.5	70.144	0	5.1001	42592000	11	20.6383	20.6311	20.1565	20.661	20.673	NaN	21.4168	20.5777	20.3723	20.5617	20.7188	20.5301	20.5103	21.2524	20.8189	20.6681	19.8819	20.3155	20.0685	20.1947
A0A0G2JE32;A0A0G2JGL0;P62838;P61079;P61080;Q6ZWY6	Ubiquitin-conjugating enzyme E2 D2;Ubiquitin-conjugating enzyme E2 D3;Ubiquitin-conjugating enzyme E2 D1;Ubiquitin-conjugating enzyme E2 D2B	Ube2d2;Ube2d3;Ube2d1;Ube2d2b	-0.414881	1.64241	0.022782	+	0.0380082	+	22.806	22.4119	23.171	22.9568	22.8259	23.5596	23.1462	23.1766	23.1248	23.2389	2	2	2	22	22	22	14.731	0	6.2313	255660000	16	22.981	NaN	22.631	23.0131	22.8861	21.3366	23.171	NaN	NaN	22.9887	22.8797	23.0021	23.0056	22.5254	22.9465	23.7016	23.5548	23.4223	23.2604	22.994
P61082;F7CDT0;F6WMC0	NEDD8-conjugating enzyme Ubc12	Ube2m	-0.437416	3.27478	0.000531152	+	0.00776285	+	21.9158	21.8762	21.6739	21.5332	21.7327	22.2257	22.2475	22.1944	22.0408	22.2105	3	3	3	16.9	16.9	16.9	20.9	0	3.4461	124180000	17	21.795	22.0272	21.9252	22.0603	22.0669	21.5012	21.8254	21.915	21.2814	21.6943	21.5829	21.3223	21.4531	21.9399	21.8051	21.8126	22.5775	22.2871	22.2336	22.0484
A0A0A6YXG9;F7CBX2;A2AN37;P52623	Uridine-cytidine kinase;Uridine-cytidine kinase 1	Uck2;Uck1	2.72956	1.42669	0.0374374	+	0.0116203	+	23.9333	NaN	NaN	20.1677	22.5373	20.9399	20.178	18.6922	18.3409	19.265	2	2	1	9.3	9.3	5.2	22.219	0	3.0342	68571000	13	23.9333	NaN	NaN	NaN	NaN	NaN	NaN	NaN	NaN	20.1677	NaN	NaN	21.1362	23.9384	NaN	20.7643	21.1155	NaN	15.6009	21.1404
Q9EPU0-2;Q9EPU0	Regulator of nonsense transcripts 1	Upf1	-0.308078	2.85622	0.00139245	+	0.0244751	+	22.0113	21.9252	21.8882	21.918	21.6359	22.1506	22.224	22.1759	22.1888	22.1796	8	8	8	8.2	8.2	8.2	122.66	0	7.3761	128700000	16	22.0079	22.0399	21.986	22.0893	21.8896	21.7968	21.893	21.9018	21.8697	21.9197	21.954	21.8802	21.9535	20.8764	22.0777	22.2581	22.0584	22.1354	22.4161	21.9371
Q9CZ13	Cytochrome b-c1 complex subunit 1, mitochondrial	Uqcrc1	0.486187	3.09341	0.000806471	+	0.00716883	+	24.1136	24.1199	24.4168	24.4384	23.9907	23.6801	23.7236	23.8295	23.7019	23.7132	11	11	11	35.2	35.2	35.2	52.851	0	82.504	520830000	72	24.3159	23.725	24.2998	24.3663	24.3582	23.6352	24.4873	24.4939	24.2691	24.472	24.4242	24.4189	24.1663	24.3817	23.4241	23.2513	23.8455	23.9436	23.9859	23.5725
Q9DB77	Cytochrome b-c1 complex subunit 2, mitochondrial	Uqcrc2	0.432161	2.56176	0.00274307	+	0.0140991	+	23.9278	24.2075	24.1836	24.0279	23.7284	23.4535	23.4964	23.7185	23.6686	23.5774	7	7	7	22.1	22.1	22.1	48.234	0	74.777	461930000	124	23.6937	24.2162	23.8735	24.1524	24.2558	24.2143	24.1116	24.1139	24.3253	24.0421	23.9474	24.0943	23.8525	23.7412	23.5916	23.5235	23.4257	23.4113	23.5492	23.515
F8VPX1;E9PXY8;Q6A4J8-3;Q6A4J8;Q6A4J8-2	Ubiquitin carboxyl-terminal hydrolase;Ubiquitin carboxyl-terminal hydrolase 7	Usp7	0.513143	1.47226	0.0337084	+	0.0355031	+	22.5555	21.9124	21.7198	21.8758	22.065	21.7348	20.9723	21.5116	21.6952	21.649	6	6	6	8.1	8.1	8.1	128.47	0	6.3556	114850000	13	22.8465	22.7346	22.0853	21.6733	22.1951	21.869	21.8787	21.6962	21.5844	21.9405	21.894	21.793	21.8261	22.4219	21.9472	21.5584	22.0648	21.5812	21.3163	20.1581
P63024;B0QZN5;P63044	Vesicle-associated membrane protein 3;Vesicle-associated membrane protein 2	Vamp3;Vamp2	0.351511	5.65487	2.21378e-06	+	0.00521466	+	20.5387	20.4784	20.6111	20.4835	20.5196	20.2194	20.1871	20.1689	20.183	20.1152	2	2	2	38.8	38.8	38.8	11.48	0.00074129	2.1469	31000000	2	20.6818	20.5062	20.4281	NaN	20.4735	20.4833	NaN	NaN	20.6111	20.7172	20.5522	20.181	20.4989	20.5181	20.5417	20.1918	20.2018	20.2644	20.1871	NaN
Q62465	Synaptic vesicle membrane protein VAT-1 homolog	Vat1	-0.346297	3.19344	0.000640553	+	0.0151299	+	20.2362	20.1476	20.1925	19.9472	20.0506	20.4129	20.4783	20.5975	20.4328	20.3841	2	2	2	6.4	6.4	6.4	43.096	0	3.1647	37035000	23	20.0255	20.4468	NaN	20.2801	20.5591	19.6037	20.0744	20.1675	20.3356	19.9207	20.1879	19.7329	20.0115	20.1331	20.0073	20.2484	20.4974	20.4929	20.5478	20.6385
Q3TIR6;P61759	Prefoldin subunit 3	Vbp1	-0.330095	2.33316	0.00464347	+	0.0299599	+	21.1244	21.2461	21.3319	21.0519	21.0739	21.3089	21.4301	21.457	21.5959	21.6868	1	1	1	7.7	7.7	7.7	14.653	0.00073314	2.0832	61266000	30	21.0332	21.2179	21.1221	21.3585	NaN	21.1336	21.3421	NaN	21.3217	21.0685	21.0593	21.028	21.0739	NaN	NaN	21.5996	21.0183	NaN	NaN	21.4362
P20152;A0A0A6YWC8	Vimentin	Vim	-0.296285	2.95908	0.00109882	+	0.0255925	+	29.591	29.7498	29.619	29.6171	29.5407	30.0805	29.8438	29.9491	29.7983	29.9274	47	47	44	77.5	77.5	75.5	53.687	0	323.31	29184000000	525	29.5273	29.5695	29.6762	29.6692	29.784	29.7961	29.7126	29.6175	29.527	29.5844	29.5578	29.7093	29.6254	29.4421	29.5547	30.0899	30.0742	30.0774	29.8895	29.7556
O88342	WD repeat-containing protein 1	Wdr1	0.290733	4.04449	9.02628e-05	+	0.0163077	+	26.0575	26.2276	26.0382	26.1077	26.0572	25.8315	25.7444	25.8124	25.7809	25.8653	17	17	17	48.7	48.7	48.7	66.406	0	323.31	2070900000	170	25.9427	26.1833	26.0466	26.0648	26.5317	26.0861	26.0464	26.0749	25.9933	26.0691	26.0473	26.2066	25.9472	26.0176	26.2068	25.7544	25.9902	25.75	25.7007	25.7521
Q8BHB4	WD repeat-containing protein 3	Wdr3	-0.398688	2.19513	0.00638078	+	0.0224891	+	19.9975	20.1116	19.937	20.1061	19.6097	20.1721	20.4356	20.2814	20.5068	20.3594	3	3	3	3.8	3.8	3.8	105.77	0	3.3173	32225000	13	19.785	20.4356	19.7717	20.191	20.0323	NaN	20.032	19.6314	20.1476	20.3273	20.089	19.9019	19.7545	19.4211	19.6535	20.2672	20.0371	20.212	20.4871	20.6358
Q8BFQ4	WD repeat-containing protein 82	Wdr82	0.433656	1.68661	0.0205772	+	0.0332968	+	21.3767	20.6477	20.7974	21.2559	20.7748	20.497	20.6896	20.4761	20.4596	20.5617	2	2	2	7.3	7.3	7.3	35.079	0.00074019	2.1424	58297000	21	21.4731	21.1626	21.4943	20.7993	20.514	20.6297	20.4515	20.9818	20.9588	21.4236	21.4525	20.8916	20.8275	20.8163	20.6805	20.4622	20.5527	20.4762	20.49	20.8143
A0A1W2P7Q6;Q9CRT8	Exportin-T	Xpot	-0.868657	2.04149	0.00908885	+	0.00767347	+	18.9025	18.4067	NaN	NaN	19.0532	19.9719	19.9655	19.5488	19.5014	19.2932	2	2	2	2.1	2.1	2.1	109.79	0.0040789	1.7484	13282000	5	18.9025	NaN	NaN	19.1432	NaN	17.6703	NaN	NaN	NaN	NaN	NaN	NaN	19.0532	NaN	NaN	20.2399	20.1042	19.5716	20.8868	18.9002
A2A7S7;Q91WQ3	Tyrosine--tRNA ligase;Tyrosine--tRNA ligase, cytoplasmic;Tyrosine--tRNA ligase, cytoplasmic, N-terminally processed	Yars	-0.612943	5.12931	7.42483e-06	+	0.000634921	+	23.1906	22.9918	23.045	22.9535	22.9015	23.7382	23.6794	23.554	23.5941	23.5814	14	14	14	28.5	28.5	28.5	63.001	0	32.27	317510000	60	22.9355	23.8551	22.7812	23.0756	22.9672	22.9325	22.8682	23.0806	23.1862	23.0801	22.9482	22.8322	23.1189	22.7944	22.7912	23.5698	23.7935	23.8514	23.7748	23.733
Q9CQV8-2;Q9CQV8;A2A5N1	14-3-3 protein beta/alpha;14-3-3 protein beta/alpha, N-terminally processed	Ywhab	0.987807	1.60582	0.0247843	+	0.0138462	+	24.6986	23.9441	24.1509	24.1407	24.6129	23.4602	22.6355	22.5329	24.2464	23.733	10	6	5	51.2	32	25.4	27.854	0	69.974	546580000	32	24.549	24.6959	24.8509	23.8289	23.9285	24.0749	23.4342	24.4171	24.6013	24.2099	24.0331	24.1791	24.5696	24.6167	24.6525	21.873	23.9901	24.5177	24.0746	24.0083
P68510	14-3-3 protein eta	Ywhah	0.405332	2.41817	0.00381796	+	0.018058	+	25.2824	25.2216	25.1292	24.9727	25.1444	24.8166	25.0167	24.7111	24.6895	24.4898	7	4	4	32.1	24	24	28.211	0	173.43	1038600000	34	25.198	25.5716	25.0777	25.0525	25.4418	25.1704	25.1901	25.2339	24.9636	24.8942	25.2165	24.8074	25.0658	25.3381	25.0293	24.9604	24.5144	24.975	24.7486	25.2177
Q9CYA6	Zinc finger CCHC domain-containing protein 8	Zcchc8	0.493554	2.19237	0.00642146	+	0.0152089	+	21.7641	21.5535	21.6701	21.5582	21.9247	21.1546	21.5141	21.4084	21.0357	20.8901	3	3	3	8.5	8.5	8.5	78.025	0	12.448	92775000	15	22.6582	20.0324	22.6018	21.3656	NaN	21.7415	21.4444	21.773	21.7931	21.3344	21.8057	21.5345	NaN	21.3854	22.464	21.1364	20.9344	21.3931	21.3017	21.7326
Q9CQE8	UPF0568 protein C14orf166 homolog		0.649432	2.22301	0.00598397	+	0.010087	+	23.3837	23.2772	23.061	23.0445	23.1403	22.1332	22.5132	22.9096	22.8881	22.2156	8	8	8	38.9	38.9	38.9	28.152	0	8.393	257360000	22	23.8319	23.242	23.0773	23.3811	23.0758	23.3746	23.1478	22.8965	23.1388	22.8997	23.3047	22.9292	23.3861	22.7965	23.2383	22.9778	23.405	20.0169	22.7119	21.8523
Q61599	Rho GDP-dissociation inhibitor 2	Arhgdib	0.566948	1.31587	0.0483203		0.0394724	+	26.3406	26.4594	25.7137	25.9178	26.57	25.9132	25.223	25.1744	26.0149	25.8412	7	7	7	57.5	57.5	57.5	22.851	0	218.85	2158600000	54	26.4524	26.1715	26.398	26.1762	26.1909	27.0113	25.3575	25.4373	26.3462	25.6124	26.5299	25.611	27.0009	26.2294	26.4797	25.7824	26.6722	25.2851	23.3596	25.9236
F6SVV1;P62082	40S ribosomal protein S7	Gm9493;Rps7	-0.645377	1.32191	0.0476533		0.0347002	+	25.0234	23.7562	24.9831	25.0779	25.1121	25.0927	25.6519	25.5437	25.4788	25.4127	7	7	7	47.4	47.4	47.4	21.882	0	33.92	1272900000	56	24.9409	25.2484	24.881	25.167	24.085	22.0167	24.8365	25.2227	24.89	25.3055	24.6577	25.2705	24.7861	25.2186	25.3316	25.399	24.3191	25.5599	25.3676	26.0333
P47968	Ribose-5-phosphate isomerase	Rpia	-0.747508	1.32955	0.0468223		0.0297002	+	20.0388	NaN	18.5538	19.8257	19.9139	20.2404	20.3894	20.1661	20.3834	20.4735	2	2	2	9.6	9.6	9.6	32.45	0	2.6307	28939000	10	20.5676	19.709	19.8399	NaN	NaN	NaN	NaN	19.676	17.4315	19.7196	19.9774	19.7803	19.9176	20.0571	19.7669	20.2164	NaN	20.2643	20.4877	20.075
B1ARA3;P61255;B1ARA5	60S ribosomal protein L26	Rpl26	-1.29207	1.34089	0.0456156		0.0186324	+	23.2842	23.6876	22.4718	22.4579	22.9504	24.2271	22.4247	25.2973	24.5306	24.8324	4	4	4	39.8	39.8	39.8	12.217	0	5.5474	515470000	27	23.2953	22.8155	23.7417	23.8834	NaN	23.4917	21.742	22.8135	22.8598	NaN	22.9804	21.9355	22.9665	22.8941	22.9905	25.3643	22.4882	24.8289	25.0614	20.3095
P62267	40S ribosomal protein S23	Rps23	-0.634969	1.32605	0.0472014		0.0351983	+	23.3223	23.3564	23.8696	24.3275	23.8094	23.9712	23.892	24.5775	24.4655	24.9539	3	3	3	21	21	21	15.807	0	164.78	593010000	24	21.695	24.2087	24.0632	23.224	23.4129	23.4324	23.8822	24.1585	23.568	23.5425	24.1421	25.298	23.775	24.0161	23.637	22.8166	24.3397	24.7573	24.6461	24.2881
Q8BWT1	3-ketoacyl-CoA thiolase, mitochondrial	Acaa2	0.580602	1.23287	0.0584968		0.0451796	+	23.2758	21.9043	23.1572	23.1725	23.1869	22.1994	22.4198	22.3417	22.3816	22.4513	6	6	6	25.2	25.2	25.2	41.829	0	17.147	224410000	30	22.9793	23.4448	23.4033	23.0468	22.6881	19.978	23.3982	23.0125	23.0609	23.205	23.1789	23.1336	23.1819	23.1243	23.2547	22.2208	22.4246	21.9527	22.4721	22.3705
Q6P8J0;A0A140LHR8;Q8BGA8-2;Q8BGA8	Acyl-coenzyme A synthetase ACSM5, mitochondrial	Acsm5	0.863937	1.03205	0.0928851		0.0494512	+	25.3339	24.6892	23.4932	24.448	24.4376	23.5313	24.6012	23.9159	23.5496	22.4842	1	1	1	5.5	5.5	5.5	30.303	0	6.5529	429480000	7	24.9017	NaN	25.766	NaN	NaN	24.6892	23.1012	NaN	23.8851	NaN	25.1597	23.7363	NaN	23.9137	24.9616	23.8517	23.3721	23.3701	NaN	24.7416
A0A1B0GS13;A0A1B0GT81;A0A1B0GTA4;Q07813;A0A1B0GSH8	Apoptosis regulator BAX	Bax	-0.543423	1.28622	0.0517344		0.0440686	+	21.1487	20.6237	21.5487	21.8143	21.829	21.723	22.1081	21.9077	22.0434	21.8993	2	2	2	22.8	22.8	22.8	12.513	0.0014524	2.05	83824000	7	NaN	22.2894	20.008	21.8102	21.6787	18.3822	NaN	21.5487	NaN	NaN	22.2209	21.4077	21.9223	21.7358	NaN	21.9849	21.6407	21.5435	21.7596	22.0692
P24270	Catalase	Cat	0.893956	1.09731	0.0799259		0.0405458	+	22.6156	21.4989	23.6662	23.2798	22.536	21.3631	22.3651	21.1166	22.0272	22.2548	6	6	6	15.6	15.6	15.6	59.795	0	7.4788	198420000	22	22.5245	23.1288	22.1936	22.3864	22.959	19.1512	24.0733	23.7522	23.1731	22.7657	23.1972	23.8764	23.5356	22.6747	21.3978	21.8543	20.2456	21.9893	23.0281	22.2946
A0A0G2JEK2;P63254	Cysteine-rich protein 1	Crip1	0.907112	1.10778	0.078022		0.0392899	+	23.7765	21.7747	24.0803	24.0051	23.8479	22.9326	22.7952	22.4271	22.4484	22.3455	2	2	2	21.9	21.9	21.9	13.582	0	5.4894	341760000	11	24.4901	23.4287	23.4105	20.3873	NaN	23.162	25.0616	23.8119	23.3675	23.4671	23.8315	24.7166	24.5762	23.5228	23.4448	22.9806	22.9278	22.8895	22.9114	22.5352
Q4FZF3	Probable ATP-dependent RNA helicase DDX49	Ddx49	0.899282	1.13361	0.0735181		0.0379512	+	21.5028	21.6209	22.2857	22.5418	21.5639	21.8549	21.1063	21.2852	21.2018	19.5706	1	1	1	2.1	2.1	2.1	54.093	0.0040513	1.7268	90751000	12	21.422	21.6493	21.4371	NaN	NaN	21.6209	22.9691	21.957	21.9309	22.469	22.2692	22.8871	NaN	21.2251	21.9028	21.7144	21.8108	22.0393	20.9861	21.2265
P62874;H3BKR2;H3BLF7	Guanine nucleotide-binding protein G(I)/G(S)/G(T) subunit beta-1	Gnb1	0.553143	1.25221	0.0559487		0.0458762	+	22.5347	23.4731	23.2154	23.7588	23.2965	22.7327	22.1471	22.8728	22.9045	22.8557	9	4	4	32.9	18.5	18.5	37.377	0	323.31	290940000	38	23.0761	22.8118	21.7161	23.738	23.5123	23.1689	23.3958	23.2949	22.9556	23.9363	23.7499	23.59	23.2883	23.2843	23.317	22.0113	23.1259	23.0608	20.1438	23.107
Q9CRB2	H/ACA ribonucleoprotein complex subunit 2	Nhp2	0.996346	1.2366	0.0579969		0.0285882	+	21.3896	21.2893	20.369	21.069	20.7195	19.8107	18.8544	20.8582	20.9449	19.3865	2	2	2	11.1	11.1	11.1	17.247	0	3.3519	51177000	16	21.3275	21.3716	21.4697	21.1515	21.4272	NaN	20.2915	20.4614	20.3539	21.1228	20.766	21.3183	20.7338	20.5704	20.8541	20.7261	18.1766	20.5294	21.1246	16.5841
A0A0A6YY37;A0A0A6YY09;A0A0A6YWY8;F8VPK8;A0A0A6YWM0		Pcdh9	1.30873	1.06608	0.085886		0.0356529	+	23.7642	22.6782	23.3502	23.3888	24.5722	23.1286	20.8649	23.4759	NaN	21.4984	2	2	2	2.9	2.9	2.9	114.31	0.0071475	1.5845	190900000	2	23.7642	NaN	NaN	22.6782	NaN	NaN	NaN	23.3444	23.356	23.5681	NaN	23.2095	23.6292	25.5152	NaN	22.5617	24.0006	22.8236	20.8649	NaN
Q99LS3;A0A0J9YVH9	Phosphoserine phosphatase	Psph	-0.524058	1.2519	0.0559882		0.0490351	+	21.7111	22.0342	22.1525	21.4526	21.9939	21.6731	22.7991	22.3122	22.6679	22.5122	4	4	4	20.4	20.4	20.4	25.096	0	5.6704	160290000	28	21.3624	22.1627	21.6082	21.8929	22.3872	21.8227	22.1721	22.3343	21.951	22.5637	22.6399	19.1543	22.5775	21.8139	21.5904	22.7643	22.6033	19.6518	22.8967	22.7974
Q9CQM8;O09167	60S ribosomal protein L21	Rpl21	-0.631072	1.17454	0.0669053		0.0463134	+	23.7783	23.9019	23.8927	22.5703	23.8422	24.587	24.568	23.9969	24.1339	23.8549	4	4	4	35.6	35.6	35.6	18.579	0	33.845	548510000	49	24.2197	22.9362	24.179	24.3163	23.526	23.8633	23.5401	25.4903	22.6477	22.1429	23.9664	21.6015	23.6091	24.1508	23.7668	24.5397	24.6626	24.5586	24.8032	23.6373
Q9D554	Splicing factor 3A subunit 3	Sf3a3	0.539978	1.26273	0.0546094		0.0461723	+	24.3887	23.6709	24.3929	24.509	24.4345	23.797	24.2951	23.3033	23.9353	23.3654	8	8	8	25.7	25.7	25.7	58.841	0	25.316	578440000	41	24.3834	24.2409	24.5419	23.4807	23.4979	24.0341	24.3292	24.5077	24.3418	24.3738	24.3001	24.8531	24.3647	24.5359	24.403	23.775	23.96	23.6562	23.9654	24.5359
P32037	Solute carrier family 2, facilitated glucose transporter member 3	Slc2a3	-0.914737	1.11286	0.077115		0.0387649	+	20.6716	20.8057	19.9135	20.8217	20.945	21.5756	23.1139	21.0811	20.7897	21.1709	2	2	2	9.1	9.1	9.1	53.478	0	9.6352	77764000	4	19.9454	20.951	21.1185	20.5412	20.518	21.3579	19.8497	20.0285	19.8624	20.8217	NaN	NaN	NaN	20.945	NaN	21.3725	21.767	21.5872	22.1407	23.3072
P09671;A0A3B2WBF0	Superoxide dismutase [Mn], mitochondrial	Sod2	0.534557	1.29903	0.0502308		0.0437313	+	21.7575	NaN	22.1345	21.8376	21.6234	21.4416	21.514	21.4864	20.5805	21.496	3	3	3	15.8	15.8	15.8	24.603	0	12.657	84854000	28	21.7575	NaN	NaN	NaN	NaN	NaN	21.4607	23.2515	21.6914	21.4141	21.9502	22.1484	21.6795	21.4021	21.7887	21.1194	21.4456	21.7598	21.67	21.4363
G3UZY2;P97493	Thioredoxin, mitochondrial	Txn2	1.15897	0.960075	0.109629		0.0499707	+	21.2086	18.7623	21.07	21.9168	20.1791	19.4016	18.3955	19.1932	20.4819	19.8699	1	1	1	11.5	11.5	11.5	14.099	0	10.154	43467000	8	20.6406	20.773	22.2121	19.6934	16.4332	20.1603	21.8304	19.9022	21.4774	22.1985	21.6352	NaN	NaN	20.6823	19.676	18.9442	19.4528	19.8078	NaN	18.3955
F6PYV5;A2AMY5;Q91VX2	Ubiquitin-associated protein 2	Ubap2	-0.778085	1.29977	0.050145		0.0299556	+	18.5093	18.4896	NaN	NaN	18.6159	19.4333	19.3753	18.5318	20.0159	19.2255	2	2	2	12.2	12.2	12.2	26.827	0.0082487	1.4743	8868800	2	18.2333	18.751	18.5437	18.1971	18.7821	NaN	NaN	NaN	NaN	NaN	NaN	NaN	NaN	NaN	18.6159	19.1245	20.1047	19.0706	19.2935	NaN
Q9CQB4;Q9D855	Cytochrome b-c1 complex subunit 7	Uqcrb	0.725775	1.09579	0.0802057		0.0485481	+	22.4199	23.0519	22.4583	22.5107	22.3514	22.3386	21.5672	22.025	22.5786	20.6539	3	3	3	30.6	30.6	30.6	13.561	0	4.2499	120170000	20	NaN	23.1476	21.6921	23.0634	23.0404	NaN	22.8549	22.2877	22.2325	22.6104	NaN	22.411	22.4634	22.2395	NaN	22.5523	22.2261	22.2375	21.72	22.4641
Q923D5	WW domain-binding protein 11	Wbp11	1.57539	0.969548	0.107264		0.041896	+	23.7112	22.7133	21.2414	23.3028	23.6251	19.0707	21.315	23.4415	22.2723	20.6174	1	1	1	6.1	6.1	6.1	69.874	0	9.0937	160510000	3	23.2389	NaN	24.1834	NaN	NaN	22.7133	21.2414	NaN	NaN	23.3346	23.271	NaN	24.4228	22.944	23.5085	18.8354	19.306	NaN	21.315	NaN
Q3UZG4;P31230	Aminoacyl tRNA synthase complex-interacting multifunctional protein 1;Endothelial monocyte-activating polypeptide 2	Aimp1	-0.292066	1.5721	0.0267858	+	0.0726931		21.846	21.8455	22.0999	21.7133	21.5211	22.1614	22.0405	22.2681	21.9847	22.0315	5	5	5	27.3	27.3	27.3	35.166	0	8.6197	122650000	23	21.6087	21.758	22.1711	22.0216	21.9553	21.5598	22.4732	21.8813	21.9453	22.0925	21.8142	21.2331	21.2488	21.6114	21.7031	22.2379	22.3363	21.9099	21.9776	22.0368
P97822-2;P97822;E9Q5H2;E9PZF5	Acidic leucine-rich nuclear phosphoprotein 32 family member E	Anp32e	0.159511	1.44673	0.0357491	+	0.20631		24.3637	24.1797	24.1269	24.0274	24.1974	23.9829	24.0812	24.0986	24.0067	23.9282	4	4	4	24.2	24.2	24.2	28.245	0	103.52	572630000	49	24.6299	24.1673	24.294	24.3473	24.503	23.6889	24.0313	24.165	24.1845	24.0859	24.0022	23.9939	24.0357	24.2964	24.2601	23.9359	24.0497	23.9632	24.0219	23.9776
P07356;B0V2N5;B0V2N7;B0V2N8	Annexin A2;Annexin	Anxa2	0.20729	2.3981	0.00399851	+	0.0800957		27.8009	27.8754	27.6642	27.5968	27.7535	27.5176	27.5592	27.5339	27.5683	27.4753	22	22	22	64.3	64.3	64.3	38.676	0	323.31	6526000000	226	27.7617	27.7543	27.8869	27.9288	27.8294	27.8681	27.7052	27.6512	27.6362	27.4429	27.7246	27.6229	27.6289	27.8185	27.813	27.6164	27.3455	27.5909	27.5119	27.5593
F6WMJ3;Q8K4I3;H3BJ53;A2AFJ8;D3Z0V2;A0A0R4J0X8;Q9ES28-6;Q9ES28-8;Q9ES28-4;Q9ES28-5;Q9ES28-3;Q9ES28-2;Q9ES28-7;Q9ES28	Rho guanine nucleotide exchange factor 6;Rho guanine nucleotide exchange factor 7	Arhgef6;Arhgef7	0.305072	1.5781	0.0264178	+	0.066229		19.638	19.2989	19.1385	19.4214	19.3399	18.9639	NaN	19.207	19.1354	18.9427	2	2	2	3.5	3.5	3.5	89.811	0	3.1577	15267000	5	19.638	NaN	NaN	NaN	19.2888	19.309	19.0129	19.1325	19.27	19.7254	19.1174	NaN	19.2947	19.4299	19.2952	19.1362	18.7916	NaN	NaN	NaN
Q91Z25;Q9WV32	Actin-related protein 2/3 complex subunit 1B	Arpc1b	0.392548	1.36053	0.043598	+	0.0599791		26.0738	25.8842	26.0548	25.7519	25.9439	25.7708	25.9013	25.6593	25.0505	25.3639	13	13	13	50.8	50.8	50.8	41.498	0	249.67	1771500000	51	25.8005	26.2582	26.1627	26.0536	26.025	25.5739	26.1367	26.2735	25.7542	25.6709	25.6237	25.9611	26.1251	25.9388	25.7678	25.7284	26.0092	25.5748	25.824	25.8946
Q9CVB6;D3YXG6	Actin-related protein 2/3 complex subunit 2	Arpc2	0.272837	1.8911	0.0128498	+	0.0622522		24.8995	24.5999	24.862	25.0579	25.035	24.6058	24.5895	24.5906	24.5879	24.7163	9	9	9	48	48	48	34.357	0	24.08	904050000	58	25.1618	24.7567	24.7798	23.7432	24.999	25.0575	25.0458	24.9673	24.5729	24.5888	24.5562	26.0288	25.184	25.0377	24.8834	24.2392	24.8236	24.7545	24.5914	24.7516
Q91YI4;Q91YI4-2;Q5F2D9	Beta-arrestin-2	Arrb2	0.276316	1.42317	0.0377422	+	0.0916641		20.0997	19.752	19.6845	20.1702	19.8862	19.6659	19.8538	19.528	19.6103	19.553	3	3	3	10.7	10.7	10.7	46.313	0	3.4982	28467000	8	20.4516	19.687	20.1604	19.9993	19.4222	19.8345	19.8571	19.656	19.5403	20.3285	20.1837	19.9982	19.7441	19.8159	20.0985	19.8068	19.6097	19.5811	19.6961	19.6798
P16460	Argininosuccinate synthase	Ass1	0.28796	1.88871	0.0129209	+	0.0556874		22.8652	22.4984	22.6671	22.6867	22.465	22.2109	22.292	22.5413	22.3539	22.3445	3	3	3	10.4	10.4	10.4	46.584	0	31.388	168110000	16	22.4178	23.3126	NaN	22.4485	22.4783	22.5685	22.951	22.3391	22.7111	22.6194	22.5021	22.9385	22.2969	22.633	NaN	22.267	22.0055	22.3601	20.9329	22.6007
O08997	Copper transport protein ATOX1	Atox1	0.235338	1.71307	0.0193612	+	0.0934064		22.7401	22.4555	22.5095	22.6203	22.7127	22.5956	22.3366	22.3615	22.313	22.2547	3	3	3	57.4	57.4	57.4	7.3384	0	16.575	171450000	19	22.5511	22.8288	22.8405	22.2244	22.6865	NaN	22.5432	22.4715	22.5138	22.5687	22.7203	22.5719	22.6096	22.6711	22.8575	22.8613	22.6608	22.2646	22.2047	22.4879
P14211	Calreticulin	Calr	0.235306	2.2352	0.00581836	+	0.0662095		27.285	27.5491	27.425	27.2487	27.4613	27.226	27.0614	27.1641	27.1326	27.2086	19	19	19	65.6	65.6	65.6	47.994	0	323.31	5154400000	214	27.309	27.2399	27.306	27.5916	27.5588	27.497	27.6401	27.2115	27.4234	27.1836	27.2756	27.287	27.2993	27.4754	27.6094	27.337	27.2766	27.0644	27.0084	27.2206
Q5RKN9;P47753	F-actin-capping protein subunit alpha-1	Capza1	0.244212	2.17121	0.006742	+	0.0640412		24.6346	24.6283	24.6081	24.7606	24.7133	24.489	24.6116	24.3314	24.263	24.4288	10	8	8	57	47.6	47.6	32.953	0	268.38	756800000	68	24.4118	24.9886	24.5034	24.8106	24.9461	24.1282	24.9133	24.3251	24.5858	24.9709	24.7142	24.5966	24.771	24.7686	24.6004	24.4185	24.7646	24.2838	24.4049	24.5473
P80314	T-complex protein 1 subunit beta	Cct2	-0.167722	1.95485	0.0110955	+	0.148205		26.2475	26.1262	26.0407	26.2064	26.0765	26.2101	26.3862	26.2498	26.3329	26.3568	23	23	23	59.1	59.1	59.1	57.477	0	236.72	2463700000	206	26.1879	26.2362	26.3182	26.0229	26.1745	26.1811	25.9674	26.1165	26.0381	26.2671	26.0319	26.32	25.9637	26.1961	26.0697	26.3995	26.0904	26.1404	26.092	26.6306
A0A1D5RL92;G5E8I8;Q8CGZ0	Calcium homeostasis endoplasmic reticulum protein	Cherp	0.316799	1.77145	0.016926	+	0.0520507		21.8605	21.9888	22.2138	21.8759	22.1948	21.6791	21.9846	21.5484	21.694	21.6436	5	5	5	6.9	6.9	6.9	106.41	0	19.408	117270000	23	21.9906	21.8385	21.7525	21.9631	21.9876	22.0157	22.4864	21.9812	22.174	22.0124	21.8104	21.8048	22.5798	22.1504	21.8541	21.899	21.3613	21.7769	21.9924	21.939
Q9Z1Q5	Chloride intracellular channel protein 1	Clic1	0.223898	1.65834	0.0219612	+	0.104686		26.4848	26.1764	26.109	26.1557	26.2167	25.8497	26.0014	26.0809	26.004	26.087	10	10	10	71.8	71.8	71.8	27.013	0	323.31	2403900000	99	26.4037	26.4428	26.6078	26.1351	26.265	26.1289	25.9256	26.0175	26.3839	26.1895	26.1214	26.1562	26.0817	26.385	26.1834	25.9218	25.8284	25.799	25.7244	26.0843
Q9QZE5	Coatomer subunit gamma-1	Copg1	-0.310707	1.66538	0.0216084	+	0.0600835		22.8491	22.4061	22.4272	22.5964	22.8291	22.9282	23.0212	22.9455	23.0346	22.732	10	10	10	16.6	16.6	16.6	97.512	0	20.218	218760000	40	23.0697	22.8355	22.642	22.6635	22.6197	21.9351	22.6432	22.0075	22.631	22.419	22.7563	22.6138	22.9844	22.8105	22.6925	22.8466	23.0449	22.893	23.0803	22.9323
A0A0J9YUM4;A0A0J9YU62;O88712-2;O88712;A0A0J9YUR5;A0A0J9YTW3;O88712-3	C-terminal-binding protein 1	Ctbp1	0.201926	1.6124	0.0244119	+	0.128251		21.046	21.1523	21.1082	21.0501	21.0706	20.956	21.0425	20.6468	20.9635	20.8088	3	3	3	11.3	11.3	11.3	37.006	0	3.0253	47270000	3	20.9246	21.0951	21.1184	20.9924	21.3077	21.1567	21.0528	21.1637	NaN	21.0731	21.0271	NaN	NaN	NaN	21.0706	21.1954	21.0152	20.6574	21.3036	20.8814
Q8VDW0	ATP-dependent RNA helicase DDX39A	Ddx39a	0.224566	1.60829	0.024644	+	0.107396		24.1702	24.1489	24.004	24.2487	24.3447	24.036	24.0253	24.047	23.7345	23.9509	14	6	6	48	20.6	20.6	49.067	0	37.493	549380000	54	24.0936	24.3184	24.0984	24.4631	24.1297	23.8539	24.1377	23.6383	24.2361	24.4378	24.0518	24.2567	24.1853	24.4073	24.4414	24.1634	23.8761	24.0684	23.5298	24.1676
Q9Z1N5	Spliceosome RNA helicase Ddx39b	Ddx39b	0.276255	1.64087	0.0228631	+	0.0745049		26.8802	26.3647	26.4519	26.7297	26.4975	26.2931	26.4031	26.28	26.2755	26.2911	15	15	7	48.6	48.6	21.3	49.035	0	323.31	2875900000	103	26.5878	27.1492	26.9036	25.8645	26.7908	26.4387	26.6544	26.5279	26.1734	26.6338	26.5911	26.9642	26.4056	26.33	26.7568	26.5088	26.1325	26.2381	26.232	26.3764
P54823	Probable ATP-dependent RNA helicase DDX6	Ddx6	0.229256	2.79339	0.00160922	+	0.052651		23.6247	23.6668	23.7767	23.7661	23.5822	23.3505	23.5019	23.5251	23.4634	23.4293	10	10	10	23.4	23.4	23.4	54.191	0	19.361	374070000	36	23.7046	23.3395	23.8299	23.7404	23.6647	23.5954	23.7936	23.9093	23.6271	24.0313	23.6697	23.5973	23.3793	23.8073	23.56	23.5286	23.62	22.903	23.5039	23.526
A0A2I3BRG8;Q99LB2	Dehydrogenase/reductase SDR family member 4	Dhrs4	0.242632	1.41006	0.0388996	+	0.111602		19.4559	19.624	19.8298	19.6174	19.8649	19.5899	19.2276	19.3662	19.499	19.4963	2	2	2	9.5	9.5	9.5	19.225	0.0065274	1.6128	14779000	2	19.7721	NaN	19.1397	19.7783	NaN	19.4697	19.8543	NaN	19.8053	19.3516	NaN	19.8832	19.9722	NaN	19.7576	19.4968	19.6158	19.6571	NaN	19.2276
A0A087WRP5;A0A087WQ86;E9QM99;Q8BZN6;Q8BZN6-4;Q8BZN6-2;Q8BZN6-3;Q8BLX9;A0A087WQA1;A0A0R4J2B7	Dedicator of cytokinesis protein 10	Dock10	0.242052	1.40359	0.0394828	+	0.112011		19.8962	19.7899	19.7627	19.6438	19.6656	19.4531	19.2393	19.6226	19.4738	19.7591	2	2	2	1.6	1.6	1.6	246.3	0.005344	1.6995	22854000	2	20.1652	19.6612	19.8622	19.9005	19.3821	20.0871	19.876	19.8104	19.6018	19.6925	19.4231	19.8158	19.2472	19.9352	19.8144	19.5431	19.1906	19.6257	19.2393	NaN
Q8JZQ9	Eukaryotic translation initiation factor 3 subunit B	Eif3b	-0.24518	1.65062	0.0223554	+	0.0914769		24.0007	23.6658	23.6798	23.8544	23.7884	23.9429	24.2424	23.9162	24.1229	23.9907	13	13	13	20.9	20.9	20.9	91.369	0	21.726	509100000	106	23.7449	24.1315	24.1257	23.8318	23.2391	23.9266	23.5513	23.6729	23.8153	23.7056	23.7651	24.0926	23.7614	23.8084	23.7952	24.0528	23.7695	24.0062	24.1191	24.2407
Q9DCH4	Eukaryotic translation initiation factor 3 subunit F	Eif3f	-0.145484	1.8939	0.0127673	+	0.196089		24.09	24.0486	23.9504	23.9799	23.984	24.0507	24.209	24.1884	24.0844	24.2479	7	7	7	24.9	24.9	24.9	37.984	0	110.22	582310000	105	24.025	24.12	24.1251	24.1554	24.1715	23.8189	23.8449	24.0113	23.9951	24.0087	23.9641	23.9668	24.0064	23.9376	24.0079	23.6518	24.2838	24.2164	24.3348	24.1223
Q9DBZ5;A0A140LJ59	Eukaryotic translation initiation factor 3 subunit K	Eif3k	-0.344365	1.52304	0.0299891	+	0.0590333		22.4238	21.7856	22.4341	22.4427	22.3355	22.6975	22.6612	22.692	22.5368	22.5561	3	3	3	19.7	19.7	19.7	25.086	0	7.3112	172730000	19	22.7003	NaN	22.1473	22.4675	20.8647	22.0245	22.3526	22.4198	22.5299	22.5829	22.4139	22.3311	22.2173	22.4499	22.3394	22.8894	22.571	22.632	22.3266	23.0814
P97807-2;P97807	Fumarate hydratase, mitochondrial	Fh	0.172889	2.07755	0.00836472	+	0.132867		23.1985	23.0504	23.1306	23.0932	23.0039	22.9369	22.8422	22.8337	22.9803	23.019	8	8	8	28.9	28.9	28.9	50.052	0	39.233	276860000	70	23.1214	23.2446	23.2295	23.1654	23.0776	22.9081	23.0144	23.0972	23.2801	23.1002	23.0495	23.1299	23.1605	22.7772	23.0741	22.7409	23.4031	22.6666	22.7549	23.1369
A0A0A0MQF6;P16858;S4R1W1;A0A1D5RLD8;S4R257	Glyceraldehyde-3-phosphate dehydrogenase	Gapdh;Gm3839	-0.207755	3.33756	0.000459664	+	0.0539431		30.3995	30.4989	30.3445	30.458	30.3853	30.6683	30.5666	30.6364	30.5708	30.6829	25	25	25	65.2	65.2	65.2	38.653	0	323.31	53667000000	743	30.2517	30.5115	30.4354	30.5177	30.6033	30.3758	30.3713	30.3039	30.3585	30.5059	30.4336	30.4346	30.3239	30.4689	30.3631	30.6959	30.7291	30.5799	30.6343	30.5085
F7BEI3;G3X987		Gimap9	0.243812	2.12489	0.00750085	+	0.0658508		20.5243	20.6113	20.2942	20.4763	20.5307	20.2339	20.3386	20.0973	20.2197	20.3283	1	1	1	10.1	10.1	10.1	15.494	0.0053619	1.7036	29630000	11	20.4911	20.5158	20.5662	20.6113	NaN	NaN	20.2942	NaN	NaN	20.4623	20.3602	20.6062	20.5046	20.5569	NaN	NaN	20.2295	20.2383	20.1294	20.744
Q9CPU0	Lactoylglutathione lyase	Glo1	-0.19805	1.48076	0.0330555	+	0.145507		22.1125	22.0649	21.832	22.0344	22.0175	22.2153	22.4173	22.2302	22.1311	22.0577	3	3	3	16.3	16.3	16.3	20.809	0	3.9214	148380000	38	21.87	22.2531	22.2144	22.0718	21.9658	22.1571	21.7589	22.008	21.7291	21.7932	22.0382	22.272	21.9909	22.017	22.0448	22.1951	22.3384	22.1125	22.5609	22.4224
Z4YKV1;P63094-2;P63094;Q6R0H7-4;Q6R0H7;P63094-3	Guanine nucleotide-binding protein G(s) subunit alpha isoforms short;Guanine nucleotide-binding protein G(s) subunit alpha isoforms XLas	Gnas	0.27334	1.37664	0.0420106	+	0.0972657		21.6656	21.6065	21.393	21.5101	21.4567	21.0777	21.4415	20.9651	21.2905	21.4905	4	3	3	13.2	10.3	10.3	44.178	0	4.5944	85992000	10	21.6538	21.8981	21.4449	21.9526	21.3704	21.4965	21.3207	21.4383	21.4201	21.576	21.4401	21.5142	21.3551	21.4082	21.6068	21.2477	20.991	20.9944	21.343	21.4488
P68040	Guanine nucleotide-binding protein subunit beta-2-like 1;Guanine nucleotide-binding protein subunit beta-2-like 1, N-terminally processed	Gnb2l1	-0.19263	1.99232	0.0101785	+	0.111824		27.0534	27.2272	27.1089	27.0017	27.0694	27.4554	27.2588	27.2549	27.213	27.2417	18	18	18	68.8	68.8	68.8	35.076	0	323.31	4713200000	309	27.0288	27.0675	27.064	27.1335	27.2589	27.2893	27.1145	27.1177	27.0946	27.0117	26.8967	27.0968	27.1067	27.0442	27.0572	27.4063	27.6532	27.3065	27.2886	27.225
O88958;D3Z0R5	Glucosamine-6-phosphate isomerase 1	Gnpda1	0.150026	1.4552	0.0350594	+	0.22358		22.4176	22.2479	22.1547	22.273	22.2275	22.0554	22.2025	22.1539	22.1733	21.9854	8	8	8	37	37	37	32.549	0	9.4852	149320000	39	22.2012	22.4166	22.6349	22.166	22.2434	22.3342	22.0238	22.0362	22.404	22.2317	22.3695	22.2179	22.1449	22.077	22.4606	22.1481	22.0581	21.9599	22.1733	22.2215
A2ATI9;Q99JX3-2;Q99JX3;A2ATI8;A2ATI6	Golgi reassembly-stacking protein 2	Gorasp2	0.232233	1.36603	0.0430495	+	0.123923		19.9377	20.0137	20.0208	20.055	20.0192	19.7775	19.4194	19.9666	19.8325	19.8894	2	2	2	7.4	7.4	7.4	45.026	0	2.3846	23265000	2	19.8501	20.0254	NaN	NaN	NaN	20.0137	20.0351	20.1257	19.9017	20.3696	19.8694	19.926	20.1121	19.9794	19.9662	19.7775	NaN	NaN	19.9402	NaN
P06745	Glucose-6-phosphate isomerase	Gpi	-0.195084	2.67127	0.00213171	+	0.0814724		26.4039	26.3835	26.4855	26.3286	26.4335	26.6736	26.648	26.4717	26.5927	26.6245	17	17	17	49.8	49.8	49.8	62.766	0	323.31	2964100000	138	26.2901	26.4489	26.4729	26.3301	26.4557	26.3647	26.5142	26.5729	26.3694	26.3788	26.1827	26.4243	26.1812	26.6494	26.47	26.7148	26.6007	26.7052	26.6875	26.4824
D6REG4;Q91Z53	Glyoxylate reductase/hydroxypyruvate reductase	Grhpr	-0.228378	1.45337	0.0352073	+	0.117735		21.6917	21.7707	21.7504	21.5082	21.5189	22.0184	21.8197	22.0019	21.6334	21.9082	3	3	3	25.4	25.4	25.4	21.262	0	3.3789	102150000	26	21.6287	21.7546	NaN	21.5966	21.8895	21.8261	21.9331	21.6148	21.7032	21.4141	21.5557	21.5548	21.5253	21.5336	21.4978	22.0203	22.3112	21.7237	21.9457	21.6922
Q61035	Histidine--tRNA ligase, cytoplasmic	Hars	-0.374776	1.4541	0.0351483	+	0.0558865		22.8131	22.4241	22.6622	22.4227	22.6046	22.826	23.4569	22.7934	22.9511	22.7732	8	8	8	17.7	17.7	17.7	57.432	0	8.5654	216330000	38	22.645	22.7175	23.0767	22.4509	22.2938	22.5275	22.61	22.6909	22.6856	22.5619	22.6018	22.1045	22.528	22.7522	22.5337	22.3803	22.802	23.2956	23.2049	23.6925
B1AUX2;Q61191	Host cell factor 1;HCF N-terminal chain 1;HCF N-terminal chain 2;HCF N-terminal chain 3;HCF N-terminal chain 4;HCF N-terminal chain 5;HCF N-terminal chain 6;HCF C-terminal chain 1;HCF C-terminal chain 2;HCF C-terminal chain 3;HCF C-terminal chain 4;HCF C-terminal chain 5;HCF C-terminal chain 6	Hcfc1	0.250023	1.50491	0.031267	+	0.0987953		22.645	22.672	22.345	22.3005	22.3267	22.1366	22.243	22.3484	22.0639	22.2472	8	8	8	4.9	4.9	4.9	215.05	0	8.8482	176300000	47	22.865	22.4517	22.6182	22.674	22.6808	22.6612	22.3376	22.3294	22.3679	22.2582	22.5107	22.1326	22.4393	21.9116	22.6291	22.563	22.1457	21.7011	22.3877	22.0301
G3X9B1		Heatr1	-0.186825	1.34771	0.0449041	+	0.172688		21.3337	21.5398	21.3122	21.2459	21.3938	21.5228	21.7849	21.431	21.4855	21.5352	5	5	5	2.7	2.7	2.7	242.07	0	4.7436	85669000	9	21.3148	21.3492	21.337	21.4585	21.5401	21.6206	21.4173	21.037	21.4822	21.3347	21.2081	21.1948	21.5543	21.2002	21.427	21.4892	21.1155	21.9639	21.5338	22.5127
P29416	Beta-hexosaminidase subunit alpha	Hexa	0.258365	1.7723	0.0168928	+	0.0741524		20.1101	20.4183	20.4407	20.1306	20.3531	20.0021	NaN	20.0403	19.9948	20.0915	2	2	2	4.2	4.2	4.2	60.612	0.0027624	1.815	31561000	11	20.1427	20.5876	19.5999	20.2491	20.5464	20.4592	20.1591	20.6322	20.5309	20.2479	20.135	20.0089	19.9388	20.5349	20.5855	20.0331	20.3066	19.6665	NaN	NaN
P97825	Hematological and neurological expressed 1 protein;Hematological and neurological expressed 1 protein, N-terminally processed	Hn1	0.232152	1.5097	0.030924	+	0.109457		22.5338	22.6474	22.4407	22.5221	22.6416	22.3247	22.2906	22.6215	22.1511	22.2368	3	3	3	37.7	37.7	37.7	16.08	0	5.4719	186630000	25	22.4304	22.3737	22.7972	22.7306	22.7462	22.4654	22.2645	22.4934	22.5643	22.3753	22.2886	22.9024	22.5728	22.5484	22.8035	22.6087	22.2833	22.0822	22.3787	22.1587
Q80XR6;Q20BD0;Q99020	Heterogeneous nuclear ribonucleoprotein A/B	Hnrnpab	-0.16552	2.31602	0.00483032	+	0.131832		25.4121	25.2643	25.2409	25.2248	25.2083	25.4699	25.4893	25.4071	25.3654	25.4465	5	5	5	21.9	21.9	21.9	33.816	0	36.566	1326900000	43	25.1255	25.8065	25.3044	25.443	25.2672	25.0827	25.4358	25.2628	25.0242	25.133	25.2181	25.3234	25.124	25.3019	25.199	25.5291	25.3302	25.5503	25.4511	25.6607
G5E924;Q8R081;G3UY38	Heterogeneous nuclear ribonucleoprotein L	Hnrnpl	0.290502	1.56779	0.0270525	+	0.0730472		27.4654	27.9731	27.8748	27.7964	27.7696	27.3697	27.7357	27.4125	27.4183	27.4905	22	22	22	64.1	64.1	64.1	66.821	0	323.31	7370300000	264	27.2376	27.5813	27.5772	28.0297	28.1092	27.7804	27.8813	27.9473	27.7958	28.2436	27.6703	27.4751	27.8164	27.8073	27.685	27.4104	27.544	27.1546	27.8373	27.6316
Q9D0E1-2;Q9D0E1;B8JK33;B8JK32	Heterogeneous nuclear ribonucleoprotein M	Hnrnpm	0.17608	1.75484	0.0175857	+	0.149183		26.6068	26.8031	26.5734	26.4956	26.6465	26.5476	26.3687	26.4414	26.4155	26.4719	24	24	24	53.3	53.3	53.3	73.74	0	323.31	3102600000	279	26.5556	26.6521	26.6127	26.7133	26.8633	26.8328	26.4923	26.6369	26.5912	26.3403	26.4562	26.6905	26.7106	26.5952	26.6337	26.611	26.6417	26.3902	26.4133	26.3483
P00493	Hypoxanthine-guanine phosphoribosyltransferase	Hprt1	-0.202072	1.76226	0.0172878	+	0.116207		25.1399	25.0034	24.7906	24.9622	25.0259	25.1333	25.3185	25.1551	25.2106	25.115	8	8	8	54.6	54.6	54.6	24.57	0	28.08	1091900000	73	24.9969	25.2586	25.1643	25.0101	24.9626	25.0376	24.7337	24.8721	24.7662	24.9071	25.075	24.9047	24.9194	25.1411	25.0173	25.3121	25.0649	25.0231	25.236	25.3114
Q3U2G2;Q61316	Heat shock 70 kDa protein 4	Hspa4	-0.208491	2.57104	0.00268512	+	0.0728758		25.6315	25.7479	25.6423	25.7722	25.566	25.9602	25.8144	25.9175	25.8076	25.9025	25	25	23	40.5	40.5	37.9	94.208	0	323.31	1700900000	217	25.5702	25.6346	25.6897	25.7194	25.7832	25.741	25.672	25.627	25.6278	25.7319	25.7443	25.8405	25.515	25.5815	25.6014	25.9021	26.0286	25.9499	25.951	25.7746
P20029	78 kDa glucose-regulated protein	Hspa5	-0.138381	1.53372	0.0292602	+	0.240715		27.9613	27.9886	27.846	27.8032	27.9113	28.1474	27.9329	28.0792	27.9699	28.0729	29	27	27	44.7	40.6	40.6	72.421	0	323.31	8314600000	475	27.8747	27.945	28.0641	27.9403	28.029	27.9965	27.8473	27.8434	27.8473	27.7427	27.7788	27.8882	27.8292	27.9318	27.9728	28.1519	28.1705	28.1199	27.9287	27.8844
P63038	60 kDa heat shock protein, mitochondrial	Hspd1	0.126102	1.51961	0.0302269	+	0.273517		27.907	27.9301	27.9881	27.9329	27.9164	27.6665	27.9208	27.7458	27.8767	27.8342	29	29	29	60	60	60	60.955	0	323.31	7636500000	387	27.8556	27.9241	27.9412	27.9877	28.0533	27.7494	27.9679	27.9779	28.0185	27.9806	27.888	27.9301	27.871	27.9763	27.902	27.7023	27.6834	27.6137	27.8238	27.9068
P54071	Isocitrate dehydrogenase [NADP], mitochondrial	Idh2	0.339175	1.3468	0.044999	+	0.0738312		21.0223	20.9696	21.1196	21.1365	21.0522	21.2191	20.6906	20.6866	20.6541	20.354	4	4	4	11.1	11.1	11.1	50.906	0	3.7188	56025000	7	21.2801	21.0253	20.7614	20.6757	21.2538	20.9792	21.6685	20.3784	21.312	20.9807	NaN	21.2923	21.5523	20.5681	21.0363	20.6587	20.9491	22.0493	20.6341	20.3056
E9Q800;Q8CAQ8-3;Q8CAQ8-2;Q8CAQ8;Q8CAQ8-5;E9QAY6;A0A0U1RQ14	MICOS complex subunit Mic60	Immt	0.309482	1.48006	0.0331087	+	0.0726645		21.7773	22.2714	22.3413	22.3178	22.1042	21.8655	22.0322	21.6729	21.795	21.8991	5	5	5	9.3	9.3	9.3	75.6	0	6.8557	127700000	33	21.7039	22.3362	21.2919	22.2714	22.3036	22.2392	22.4388	22.3304	22.2548	22.2269	22.2392	22.4874	22.07	22.2211	22.0216	21.6879	22.1482	21.7604	22.0506	21.8557
Q9ES52-4;Q9ES52-3;Q9ES52-2;Q9ES52	Phosphatidylinositol 3,4,5-trisphosphate 5-phosphatase 1	Inpp5d	-0.374254	1.45212	0.0353087	+	0.0559858		20.4499	20.1736	20.259	19.9542	20.0647	20.4231	20.8926	20.2077	20.4963	20.7529	3	3	3	3.4	3.4	3.4	108.34	0	2.7358	41727000	7	20.694	20.58	20.0756	20.1962	20.127	20.1977	19.8153	20.5294	20.4323	20.1306	19.9816	19.7505	19.9496	20.0376	20.2067	20.249	20.4883	20.5321	20.9523	20.4112
P26011	Integrin beta-7	Itgb7	0.332755	1.46185	0.0345263	+	0.0663137		20.7546	20.8544	20.2159	20.8596	20.6378	20.2189	20.3856	20.3907	20.1919	20.4713	2	2	2	3.6	3.6	3.6	87.411	0.0027894	1.856	40656000	3	NaN	20.7694	20.7397	20.8803	20.893	20.7898	20.7421	21.1197	18.7859	NaN	20.9524	20.7668	20.6469	20.611	20.6553	20.2213	20.3815	20.0538	19.9464	20.4918
Q6P9L6;A0A1L1SVE8;A0A1L1SU97	Kinesin-like protein KIF15	Kif15	-0.25701	1.82581	0.0149344	+	0.0728787		19.5468	19.7717	19.4669	19.3641	19.4466	19.6107	19.8439	19.7894	19.763	19.8741	2	2	2	2	2	2	160.12	0	2.9146	25856000	6	19.65	19.4123	19.5781	19.6269	19.8576	19.8308	19.1323	19.3493	19.919	19.895	19.4285	18.7687	19.1555	19.8976	19.2865	19.6085	19.9458	19.2779	19.4536	20.0843
Q60960;Q4FJZ2;O35345	Importin subunit alpha-5;Importin subunit alpha-5, N-terminally processed;Importin subunit alpha;Importin subunit alpha-7	Kpna1;Kpna6	-0.228584	1.43575	0.0366649	+	0.1194		22.4344	22.4873	22.0921	22.3853	22.1266	22.6687	22.5511	22.4446	22.5497	22.4545	6	6	6	18.6	18.6	18.6	60.182	0	11.13	174080000	26	22.4659	22.2714	22.566	22.5268	22.6548	22.2802	22.3436	21.5726	22.36	22.3793	22.3734	22.4032	20.7725	23.0846	22.5228	22.6287	22.7534	22.6239	22.5721	22.6166
Q6PB66	Leucine-rich PPR motif-containing protein, mitochondrial	Lrpprc	0.293461	1.6776	0.0210086	+	0.0656109		23.2623	23.1485	23.4724	23.4789	23.4532	22.77	23.1314	23.0922	23.1385	23.2159	15	15	15	13.3	13.3	13.3	156.61	0	25.801	296300000	72	23.1221	23.3901	23.2748	23.414	22.7409	23.2907	23.5836	23.4671	23.3664	23.544	23.3901	23.5026	23.4251	23.5369	23.3977	22.3173	23.086	22.9067	23.2785	23.0891
Q6ZWM4	U6 snRNA-associated Sm-like protein LSm8	Lsm8	0.249932	1.40543	0.0393164	+	0.107147		22.1585	22.5801	22.2981	22.2568	22.4583	22.3109	21.8961	22.0271	22.1309	22.1372	2	2	2	20.8	20.8	20.8	10.403	0	3.7643	152350000	35	22.2295	21.8951	22.3509	22.3787	22.5358	22.8259	22.3346	21.9593	22.6005	22.2015	22.0523	22.5167	22.326	22.5658	22.483	22.5581	22.2486	22.1261	21.9816	21.8968
P25206	DNA replication licensing factor MCM3	Mcm3	0.234522	2.23675	0.00579763	+	0.0663462		25.3943	25.2088	25.1311	25.1716	25.0489	25.01	24.9784	24.909	25.0027	24.8819	23	23	23	33.5	33.5	33.5	91.545	0	120.37	1111200000	191	25.1861	25.527	25.4697	25.3295	25.1288	25.168	25.2382	25.037	25.118	25.0061	25.2642	25.2445	24.9823	25.1097	25.0546	25.1197	25.0236	24.8867	24.7785	25.1666
Q922D8;A0A1W2P733	C-1-tetrahydrofolate synthase, cytoplasmic;Methylenetetrahydrofolate dehydrogenase;Methenyltetrahydrofolate cyclohydrolase;Formyltetrahydrofolate synthetase;C-1-tetrahydrofolate synthase, cytoplasmic, N-terminally processed	Mthfd1	-0.186831	2.26151	0.00547634	+	0.105003		24.0245	24.1255	24.0782	24.0834	23.9846	24.3311	24.2665	24.2381	24.0865	24.3082	16	16	16	22.2	22.2	22.2	101.2	0	47.126	565980000	155	24.0445	23.6661	24.3627	24.1242	24.1571	24.0954	24.2621	23.8779	24.0946	24.1563	24.0621	24.0318	24.1314	23.8076	24.0148	24.3629	24.3304	24.3	24.2291	24.2966
Q8VDD5	Myosin-9	Myh9	0.129099	1.47238	0.0336995	+	0.270537		27.8206	27.9849	27.8911	27.7188	27.8238	27.77	27.6543	27.7765	27.6723	27.7207	77	77	66	48.7	48.7	42.4	226.37	0	323.31	7085600000	522	27.8663	27.8008	27.7948	27.9555	28.0067	27.9925	27.9205	27.8323	27.9205	27.6738	27.6739	27.8087	27.7416	27.8612	27.8686	27.7854	27.8198	27.7047	27.5949	27.649
Q60817;P70670	Nascent polypeptide-associated complex subunit alpha;Nascent polypeptide-associated complex subunit alpha, muscle-specific form	Naca	-0.248876	1.55143	0.0280913	+	0.0958321		25.0021	24.9187	24.7581	24.8885	24.8003	24.8337	25.286	25.2557	25.1799	25.0567	4	4	4	25.6	25.6	25.6	23.384	0	323.31	1066100000	79	24.9628	25.0673	24.9761	24.9544	24.9746	24.827	24.7356	24.8112	24.7274	25.028	24.5189	25.1186	24.788	24.7399	24.8731	25.3153	24.0403	25.1454	25.4173	25.273
Q8C156	Condensin complex subunit 2	Ncaph	0.212527	1.43924	0.036371	+	0.133569		20.8858	20.8095	20.864	20.7989	20.9514	20.6501	20.4318	20.6568	20.5828	20.9255	4	4	4	8.2	8.2	8.2	82.302	0	4.8789	47056000	10	NaN	20.8858	NaN	21.1262	20.6178	20.6843	20.9062	21.0328	20.6531	20.6724	20.8537	20.8706	20.969	20.8315	21.0536	20.782	20.4807	20.6876	20.4589	20.3696
E9Q109;Q9CXK8	60S ribosome subunit biogenesis protein NIP7 homolog	Nip7	-0.279759	1.64408	0.0226945	+	0.0728933		20.8088	21.073	21.0344	20.7566	20.8493	21.3061	21.3806	21.0321	21.2192	20.983	2	2	2	18.8	18.8	18.8	15.224	0	9.0875	58414000	2	NaN	NaN	20.8088	21.4004	21.158	20.6606	21.0783	21.12	20.905	20.4552	21.1174	20.697	20.8184	20.8543	20.8752	21.1367	21.1025	21.6791	21.2174	21.6578
D3YUV1;Q99J45	Nuclear receptor-binding protein	Nrbp1	0.169933	1.42079	0.0379494	+	0.191079		19.4348	19.2892	19.4051	19.4509	19.3471	19.3107	19.1076	19.0941	19.1572	19.4079	2	2	2	5	5	5	60.85	0	2.4566	16615000	2	NaN	19.2411	19.6285	19.2705	19.3909	19.2062	19.3154	19.2113	19.6887	19.6051	19.2968	NaN	19.5849	19.1492	19.3073	19.2657	19.5636	19.1029	19.2391	18.9761
O35685	Nuclear migration protein nudC	Nudc	-0.280719	1.46616	0.034185	+	0.0860782		22.9765	23.3205	23.1602	23.2107	23.2274	23.8101	23.2881	23.3013	23.4588	23.4406	7	7	7	23.8	23.8	23.8	38.358	0	11.645	313720000	55	22.8984	23.0111	23.0201	23.2522	23.4227	23.2866	23.4223	23.0539	23.0045	23.2328	23.0235	23.3757	23.1574	23.2018	23.3231	24.1977	23.6108	23.622	23.432	23.2748
P29758	Ornithine aminotransferase, mitochondrial	Oat	-0.172099	1.4932	0.032122	+	0.178203		22.653	22.6167	22.6724	22.6456	22.5799	22.8068	22.6363	22.6901	22.9266	22.9684	6	6	6	19.1	19.1	19.1	48.354	0	10.924	223020000	40	22.8677	22.3572	22.7342	23.205	22.2776	22.3675	22.8699	22.4406	22.7068	22.9776	22.7472	22.2119	22.8501	22.3077	22.5819	22.7579	22.9187	22.7437	22.89	22.3273
Q8CAS9-3;Q8CAS9-2;Q8CAS9;H7BWY5	Poly [ADP-ribose] polymerase 9	Parp9	-0.144534	1.43443	0.036776	+	0.236602		19.8628	19.9327	19.8236	19.7963	19.6645	20.0748	19.9951	19.9069	19.9667	19.859	2	2	2	2.9	2.9	2.9	75.738	0.00074683	2.1836	27134000	12	NaN	20.0156	19.7099	19.9713	19.8941	NaN	19.7637	19.7993	19.9078	19.9738	19.8682	19.5471	19.6321	19.6981	19.6632	20.1267	20.3192	19.7787	19.8824	20.2179
F6V9F1;F7D432;E9PWE0;E0CYV0;P23506;P23506-2	Protein-L-isoaspartate O-methyltransferase;Protein-L-isoaspartate(D-aspartate) O-methyltransferase	Pcmt1	0.215493	1.97792	0.0105216	+	0.092061		21.5778	21.292	21.4674	21.3807	21.5225	21.1603	21.2777	21.1384	21.3606	21.2259	3	3	3	21.5	21.5	21.5	18.823	0	17.817	77802000	49	21.5162	21.5233	21.694	21.2929	21.2733	21.3099	21.5798	21.5046	21.3178	21.3869	21.2512	21.5039	21.5077	21.3513	21.7085	NaN	21.0944	21.2263	21.3388	21.4829
P27773	Protein disulfide-isomerase A3	Pdia3	0.192604	4.20507	6.23635e-05	+	0.052556		28.6294	28.6612	28.6237	28.5647	28.5872	28.4677	28.4324	28.4481	28.3657	28.3894	35	35	34	67.7	67.7	64.8	56.678	0	323.31	11760000000	414	28.5449	28.6024	28.741	28.6766	28.6929	28.6142	28.6442	28.5832	28.6438	28.4809	28.52	28.6933	28.5934	28.6095	28.5586	28.3803	28.5397	28.483	28.4469	28.4797
O70400;S4R1V0	PDZ and LIM domain protein 1	Pdlim1	0.201266	2.02082	0.00953202	+	0.102312		23.7795	23.8888	23.6634	23.7807	23.7808	23.7346	23.6386	23.5214	23.5088	23.4833	7	7	7	28.1	28.1	28.1	35.774	0	18.803	408690000	57	23.8754	23.67	23.7931	23.9105	23.9307	23.8251	23.7684	23.4444	23.7773	23.7624	23.6797	23.8998	23.6846	23.8412	23.8165	23.2669	24.1982	23.7388	23.657	23.4531
Q9WU28	Prefoldin subunit 5	Pfdn5	-0.207792	2.65629	0.00220656	+	0.0710846		21.5948	21.6562	21.5499	21.5673	21.6412	21.8792	21.6665	21.804	21.9089	21.7896	3	3	3	24.7	24.7	24.7	17.356	0	2.9056	99176000	11	21.6647	21.3751	21.7445	21.6816	NaN	21.6308	21.3229	21.8672	21.4595	21.4194	21.7562	21.5262	21.5332	21.7149	21.6756	21.9037	22.206	21.528	21.2158	21.9512
P67778;Q5SQG5	Prohibitin	Phb	0.142037	1.35336	0.0443243	+	0.251295		25.861	25.7869	25.672	25.6512	25.6069	25.5391	25.5523	25.591	25.4826	25.7029	14	14	14	54	54	54	29.82	0	221.57	1594700000	135	25.8276	25.8535	25.9018	25.8871	25.7591	25.7144	25.574	25.6572	25.785	25.6084	25.5964	25.7489	25.7407	25.3302	25.7496	25.7176	25.4564	25.4433	25.4781	25.5503
O35654;A8Y5G7	DNA polymerase delta subunit 2	Pold2	0.292076	1.49372	0.0320832	+	0.0788892		20.1981	20.4568	20.3389	20.7763	20.3425	20.1881	19.9897	20.2023	20.2698	20.0024	2	2	2	6	6	6	51.354	0	2.9668	40620000	6	19.8606	20.2421	20.4916	20.4004	20.4848	20.4852	20.121	20.3955	20.5001	20.4503	20.7345	21.1441	20.5564	19.9621	20.5089	20.3926	19.9421	20.2295	20.2469	18.6717
Q9CR16	Peptidyl-prolyl cis-trans isomerase D	Ppid	-0.342332	1.47874	0.0332092	+	0.0626299		22.7145	22.8902	22.6344	22.7142	22.8305	23.3049	23.3441	22.6441	23.1464	23.0558	8	8	8	27.3	27.3	27.3	40.742	0	8.4745	254620000	34	22.8375	22.6289	22.677	22.7789	23.1256	22.766	22.8096	22.5641	22.5293	22.6642	22.8005	22.6778	22.7185	22.98	22.7928	23.5909	22.9321	23.3918	23.4103	23.3462
A2AR02;A2AR01	Peptidyl-prolyl cis-trans isomerase G;Peptidyl-prolyl cis-trans isomerase	Ppig	0.244529	2.14954	0.00708702	+	0.0646644		21.0088	20.9041	21.2178	20.8135	21.0146	20.745	20.7182	20.7626	20.7444	20.7659	3	3	3	4.8	4.8	4.8	88.324	0	15.338	59582000	35	20.6982	21.1487	21.1793	20.6384	21.0898	20.9842	20.9908	21.2886	21.374	21.1016	20.8755	20.4635	21.004	20.9434	21.0964	20.8711	20.869	20.495	20.5275	20.8206
P62141	Serine/threonine-protein phosphatase PP1-beta catalytic subunit	Ppp1cb	0.285212	1.66165	0.0217945	+	0.0694133		21.8328	21.9311	21.7126	21.9004	21.971	21.4558	21.4716	21.7655	21.3945	21.8344	10	3	3	39.1	10.7	10.7	37.186	0	3.6529	100800000	9	21.7919	21.7605	21.9459	21.9244	21.9775	21.8914	21.5023	21.4886	22.1471	NaN	21.829	21.9719	22.2235	21.5225	22.1669	21.8845	21.1574	21.3256	21.5267	21.6052
Q8BQ30;Q8BQ30-2	Phostensin	Ppp1r18	0.231753	2.25058	0.00561587	+	0.0679195		19.8536	19.8693	19.6883	19.8917	19.9576	19.5463	19.7656	19.5453	19.5758	19.6688	3	3	3	6.4	6.4	6.4	65.629	0	3.2112	22514000	4	19.4592	19.9668	20.135	19.9049	NaN	19.8338	19.7387	19.6923	19.634	19.7486	20.1628	19.7638	19.9223	20.1539	19.7965	19.3239	19.7401	19.575	NaN	19.7801
P97470	Serine/threonine-protein phosphatase 4 catalytic subunit	Ppp4c	0.257203	1.61657	0.0241786	+	0.0863551		21.2872	21.3004	21.3055	21.2762	21.5253	20.8135	21.2571	20.9901	21.1768	21.1709	5	4	4	29	24.1	24.1	35.08	0	21.084	81497000	28	21.4769	21.0757	21.3089	21.3398	21.2189	21.3425	NaN	21.2281	21.3828	21.3194	21.4755	21.0337	21.3464	21.6018	21.6277	21.1297	20.6072	20.7037	21.0983	21.3335
Q9QUR6	Prolyl endopeptidase	Prep	-0.285094	1.549	0.0282488	+	0.0775588		23.1163	23.0387	22.9892	22.8728	22.9922	22.9415	23.537	23.2322	23.3698	23.3543	9	9	9	17.5	17.5	17.5	80.751	0	18.526	279110000	68	22.7201	23.364	23.2647	23.1263	23.1713	22.8185	23.0285	22.7739	23.1653	22.8734	22.9681	22.7771	22.7837	22.8406	23.3523	23.3756	22.4528	22.9961	23.5248	23.5423
P62192	26S protease regulatory subunit 4	Psmc1	-0.249829	1.71406	0.0193169	+	0.0837417		22.3346	22.4576	22.6223	22.2966	22.446	22.8663	22.5558	22.7287	22.519	22.7363	4	4	4	12.3	12.3	12.3	49.184	0	9.3892	186320000	47	22.4384	22.3678	22.1974	22.4643	22.6579	22.2507	22.7176	22.4653	22.684	22.1959	22.1787	22.5151	22.4278	22.7108	22.1993	22.8458	22.5676	23.1856	22.7156	22.3502
P62196;Q8K1K2	26S protease regulatory subunit 8	Psmc5	-0.26548	1.88439	0.0130499	+	0.0658065		22.7125	22.8387	22.5143	22.4869	22.6494	23.1055	22.8334	22.9051	22.8075	22.8775	9	9	9	24.9	24.9	24.9	45.626	0	11.102	230400000	78	22.5453	22.8098	22.7824	23.2814	22.6986	22.536	22.5413	22.3862	22.6152	22.6303	22.3412	22.4892	22.7109	22.6974	22.5399	22.8244	23.3061	23.186	22.9887	22.7905
Q99JI4;A0A286YDW8	26S proteasome non-ATPase regulatory subunit 6	Psmd6	-0.29597	1.477	0.0333427	+	0.0787138		23.1915	22.8974	23.0488	22.7437	23.1856	23.38	23.527	23.2417	23.3333	23.0648	10	10	10	29.3	29.3	29.3	45.536	0	11.081	294850000	70	23.1209	23.2363	23.2172	22.8219	22.8775	22.9928	23.1908	22.8385	23.1172	22.7642	22.9443	22.5228	23.1373	23.3721	23.0473	23.3159	23.4549	23.3692	23.4559	23.599
Q8BGJ5;Q922I7;Q8CB58;P17225;E9QMW9	Polypyrimidine tract-binding protein 1	Ptbp1	0.130326	1.39088	0.040656	+	0.274898		26.7522	26.7154	26.652	26.5939	26.6336	26.7129	26.5419	26.4777	26.4923	26.4707	16	16	13	42.5	42.5	39.7	56.891	0	323.31	3552800000	158	26.6262	26.7919	26.8385	26.7029	26.8193	26.6241	26.5241	26.7538	26.678	26.6266	26.5773	26.5779	26.5528	26.6745	26.6734	26.8621	26.7231	26.5536	26.4922	26.6558
Q5SW88;P62821;Q5SW87;Q5SW86	Ras-related protein Rab-1A	Rab1;Rab1A	0.260765	2.315	0.00484176	+	0.0502742		24.5155	24.6875	24.4998	24.5457	24.6916	24.1867	24.3156	24.4334	24.2412	24.4595	6	6	3	49.5	49.5	26.7	22.372	0	7.3366	770400000	23	24.6344	24.4644	24.4477	24.7906	24.6021	24.67	24.4945	24.4876	24.5174	24.5319	24.577	24.5282	24.8384	24.7245	24.5118	24.4466	23.6308	24.4827	24.2539	24.306
P62827;Q14AA6	GTP-binding nuclear protein Ran	Ran;1700009N14Rik	-0.258293	2.25815	0.00551884	+	0.0529838		26.8387	27.0593	26.8986	26.8218	26.9109	27.3241	27.0964	27.159	27.0087	27.2324	12	12	12	56	56	56	24.423	0	323.31	4226700000	147	26.8021	26.8287	26.8853	27.0039	27.1167	27.0573	26.9684	26.9146	26.8127	26.6926	26.7766	26.9961	26.8675	26.9295	26.9356	27.2866	27.4141	27.2716	27.1765	27.139
Q8C2Q3;E9QL13;Q8C2Q3-2	RNA-binding protein 14	Rbm14	0.245982	1.4599	0.0346821	+	0.1049		23.1753	23.6219	23.4266	23.2625	23.3997	23.3409	22.9972	23.0451	23.1103	23.1626	6	6	4	10	10	6.4	69.448	0	8.6204	307150000	46	23.1916	23.1843	23.1501	23.6031	23.6958	23.5667	23.5009	23.4803	23.2987	23.2334	23.1306	23.4233	23.3176	23.4077	23.474	23.2597	23.451	23.312	23.0244	23.0093
P14206;A0A1L1SRW0	40S ribosomal protein SA	Rpsa	-0.186348	2.34005	0.00457041	+	0.102366		27.2884	27.2148	27.0403	27.0592	27.1428	27.3495	27.3153	27.3387	27.3097	27.3639	12	12	12	53.2	53.2	53.2	32.838	0	323.31	4942300000	182	27.2457	27.2251	27.3944	27.1936	27.2113	27.2394	26.9543	27.0384	27.1282	27.0772	27.0457	27.0547	27.1495	27.1358	27.1432	27.3476	27.3495	27.3514	27.3193	27.2695
P60122	RuvB-like 1	Ruvbl1	-0.224519	2.97515	0.00105888	+	0.0512145		24.5647	24.5483	24.6971	24.6224	24.7415	24.8847	24.9368	24.85	24.8395	24.7855	13	13	13	34.4	34.4	34.4	50.213	0	53.053	861530000	118	24.6518	24.7741	24.268	24.6877	24.575	24.3822	24.6194	24.7185	24.7533	24.5124	24.5803	24.7744	24.6588	24.7208	24.8449	24.8059	24.9682	24.8799	24.9609	24.8582
Q9D662;A2ANA0;A2AN98;A2AN99	Protein transport protein Sec23B	Sec23b	-0.150343	2.01366	0.00969031	+	0.175518		21.7531	21.7738	21.8406	21.6468	21.8548	21.8421	21.9403	21.9104	21.9347	21.9934	4	4	4	6	6	6	86.436	0	5.8403	110070000	32	21.3448	22.2006	21.7139	21.7692	21.7603	21.7919	21.7295	22.0386	21.7536	21.6062	21.7119	21.6224	22.0524	21.7779	21.7342	21.755	22.0472	21.7242	22.1089	21.9932
D3YWV5;Q62178	Semaphorin-4A	Sema4a	0.264508	1.57203	0.0267896	+	0.0856113		19.7192	19.6612	19.4355	19.4846	19.2835	19.0999	19.2616	19.2397	19.4557	19.2047	2	2	2	4.9	4.9	4.9	68.923	0	2.3465	19029000	4	19.2707	19.9261	19.9608	19.7053	19.6378	19.6406	19.3812	19.5237	19.4016	19.3757	19.6784	19.3996	19.2853	NaN	19.2818	19.0497	19.4155	18.8345	19.1589	19.2573
A0A0U1RQA1;P42209;D3Z3V3;A0A0U1RPA8;D3YVG1	Septin-1	Sept1	0.229444	2.35787	0.0043866	+	0.0656218		24.3579	24.1699	24.2196	24.0893	24.294	24.0462	23.9881	23.8646	24.0301	24.0545	10	10	10	43.3	43.3	43.3	37.372	0	53.104	580220000	105	24.2008	24.378	24.495	24.0816	24.0346	24.3934	24.0874	24.3354	24.236	24.1271	24.005	24.1359	24.2349	24.217	24.4301	23.9948	24.1128	24.031	23.9781	23.9632
B0R029;E9Q8A1;B0R030;Q9D3L3;O09044	Synaptosomal-associated protein;Synaptosomal-associated protein 23	Snap23	0.300581	1.55608	0.0277917	+	0.0703987		20.0052	19.8495	19.9317	19.8414	19.7304	19.3124	19.9047	19.5915	19.4114	19.6352	1	1	1	16.5	16.5	16.5	9.5948	0.0047138	1.7234	28527000	16	19.8883	20.1786	19.9486	19.9682	19.8404	19.74	19.7692	20.0523	19.9735	19.4426	19.8274	20.2541	19.7607	19.8339	19.5966	19.166	19.3138	19.4574	20.3278	19.6292
Q6P4T2	U5 small nuclear ribonucleoprotein 200 kDa helicase	Snrnp200	0.242327	2.49123	0.00322682	+	0.053195		24.5747	24.7576	24.5586	24.5116	24.4877	24.254	24.3516	24.3366	24.2843	24.4522	22	22	22	14	14	14	244.54	0	52.593	706080000	174	24.6009	24.5133	24.6098	24.7866	24.8039	24.6822	24.5554	24.5578	24.5626	24.5259	24.4104	24.5986	24.4636	24.5192	24.4803	23.8221	24.6073	24.3326	24.5189	24.3394
P62317	Small nuclear ribonucleoprotein Sm D2	Snrpd2	0.267735	1.72293	0.0189264	+	0.0731661		24.4978	24.8414	24.4082	24.5306	24.6181	24.5134	24.1918	24.2699	24.2739	24.3082	6	6	6	51.7	51.7	51.7	13.527	0	323.31	740380000	93	24.4513	24.4151	24.627	24.6715	24.9272	24.9254	24.684	23.9523	24.5883	24.4585	24.5111	24.6222	24.4298	24.6097	24.8149	24.5585	24.5221	24.4596	24.1981	24.2569
H7BX95;Q6PDM2;Q6PDM2-3;Q6PDM2-2	Serine/arginine-rich splicing factor 1	Srsf1	0.288226	1.38282	0.0414168	+	0.0905139		24.6626	25.0728	24.8935	24.9246	24.9154	24.7271	24.6234	24.8928	24.4498	24.3347	6	6	6	34.4	34.4	34.4	28.329	0	16.201	1006300000	162	24.9033	24.7096	24.3749	25.0276	25.1036	25.0872	24.8021	24.9967	24.8817	24.939	24.8716	24.9632	24.7367	24.992	25.0177	24.663	24.7067	24.8116	24.6937	24.622
Q99K94;Q8C3V4;A0A087WSP5;P42225	Signal transducer and activator of transcription;Signal transducer and activator of transcription 1	Stat1	0.238306	2.55094	0.00281228	+	0.0534714		25.049	25.2099	24.9636	24.9506	25.0773	24.9007	24.7954	24.8448	24.7117	24.8063	23	23	23	43	43	43	83.106	0	79.456	982920000	152	24.9925	25.067	25.0876	25.0394	25.2838	25.3064	24.9618	24.8771	25.0518	25.0047	24.8905	24.9566	25.0016	25.0408	25.1896	24.8023	25.1446	24.7552	24.7988	24.8174
Q60864	Stress-induced-phosphoprotein 1	Stip1	-0.17038	1.48279	0.0329013	+	0.182657		25.4762	25.469	25.1617	25.5218	25.3793	25.6086	25.6064	25.5548	25.5637	25.5264	15	15	15	32.6	32.6	32.6	62.581	0	323.31	1483800000	139	25.4984	25.7782	25.1521	25.4386	25.4939	25.4746	25.0414	25.0472	25.3963	25.4839	25.626	25.4555	25.2836	25.5557	25.2987	25.6612	25.6204	25.5442	25.6126	25.6091
A2AD84;Q99JT2	Serine/threonine-protein kinase 26	Stk26	0.244417	1.35134	0.0445302	+	0.116129		22.9559	23.0153	22.7861	23.0611	23.0675	23.058	22.6887	22.7609	22.5994	22.5569	8	8	3	23.5	23.5	9.2	43.952	0	8.7256	232400000	29	23.1071	22.8809	22.8796	23.157	22.7056	23.1833	23.1476	22.8364	22.3743	22.9506	23.0218	23.211	23.0982	23.0851	23.0193	22.9707	23.1959	23.0074	22.8079	22.6308
Q9WVA4	Transgelin-2	Tagln2	0.20673	2.96465	0.00108481	+	0.0638763		27.2452	27.3592	27.1906	27.2533	27.2997	26.9523	27.0587	27.1344	27.0742	27.0948	13	13	13	61.8	61.8	61.8	22.395	0	323.31	4755800000	195	27.2785	27.1653	27.2918	27.3076	27.3646	27.4052	27.1551	27.1904	27.2265	27.2663	27.1892	27.3043	27.2646	27.3062	27.3283	27.2539	26.8727	26.7304	27.0041	27.0413
D3Z637;D3Z125;E9PUA7;D3Z7X7;F8WHQ1;Q62393-2;Q62393-3;Q62393;D3Z2U2	Tumor protein D52	Tpd52	-0.31601	1.68755	0.0205328	+	0.0562686		20.1332	19.7832	19.8197	19.7426	20.0917	20.1443	20.1337	20.2298	20.1308	20.5118	2	2	2	17.9	17.9	17.9	17.603	0.0007391	2.1399	17658000	3	NaN	20.0639	20.2025	NaN	19.7832	NaN	NaN	19.8197	NaN	NaN	NaN	19.7426	20.0917	NaN	NaN	NaN	20.2399	20.0487	20.1205	20.0462
P17751;H7BXC3	Triosephosphate isomerase	Tpi1	-0.120472	1.69982	0.0199611	+	0.274038		28.3801	28.5113	28.3717	28.3293	28.4269	28.631	28.5154	28.5101	28.492	28.4732	17	17	17	73.9	73.9	73.9	32.191	0	323.31	11588000000	305	28.3434	28.4764	28.3204	28.478	28.5258	28.5303	28.3721	28.3603	28.3828	28.3361	28.1813	28.4704	28.3902	28.3201	28.5704	28.6418	28.7222	28.529	28.584	28.5132
Q64514-2;Q64514;A0A087WRC0;Q05DJ9	Tripeptidyl-peptidase 2	Tpp2	-0.185748	1.55704	0.0277309	+	0.151875		23.6175	23.6872	23.6676	23.4883	23.4959	23.8017	23.858	23.8418	23.8231	23.5606	14	14	14	15.5	15.5	15.5	138.46	0	27.77	414680000	114	23.6203	23.6442	23.5879	24.0035	23.5987	23.4595	23.5846	23.6817	23.7363	23.5223	23.4833	23.4591	23.5534	23.6824	23.2517	23.7998	23.9442	23.6611	23.9275	23.8544
Q9JMH6-2;Q9JMH6	Thioredoxin reductase 1, cytoplasmic	Txnrd1	-0.246822	2.2153	0.00609113	+	0.0608666		22.1694	22.1664	22.1977	22.3847	22.2536	22.5618	22.575	22.2827	22.5172	22.4693	6	6	6	16	16	16	54.544	0	7.3289	160620000	35	21.9912	21.9207	22.5963	21.9173	22.5775	22.0045	21.9083	22.1759	22.5089	22.5895	22.1042	22.4604	22.1712	22.3334	22.2561	22.7748	22.253	22.6576	22.2538	23.1267
Q02053	Ubiquitin-like modifier-activating enzyme 1	Uba1	-0.18899	1.46732	0.0340938	+	0.156505		26.3123	26.374	25.9803	26.2709	26.3407	26.5202	26.4645	26.4091	26.4201	26.4091	23	23	23	36.7	36.7	36.7	117.81	0	323.31	2730200000	171	26.2606	26.3171	26.3592	26.3351	26.4461	26.3408	26.1478	26.1809	25.6122	26.1763	26.2083	26.428	26.2734	26.3956	26.353	26.4755	26.6709	26.4142	26.3191	26.4516
Q3TL72;Q8C878;Q8C878-2	NEDD8-activating enzyme E1 catalytic subunit	Uba3	-0.251442	2.14021	0.00724092	+	0.0612526		19.6119	19.7344	19.7705	19.7125	19.4542	19.9992	19.9987	19.8987	19.7873	19.8566	2	2	2	5.8	5.8	5.8	49.957	0	2.5107	22884000	19	19.3953	19.4698	19.9707	19.8004	19.6987	19.704	NaN	19.998	19.543	19.6625	19.7625	NaN	19.1013	19.7254	19.5359	20.5277	NaN	19.4707	NaN	20.0308
D3Z061;Q8C7R4	Ubiquitin-like modifier-activating enzyme 6	Uba6	-0.228788	1.65037	0.0223683	+	0.102281		20.6982	20.6735	20.7324	20.8596	20.6828	20.9202	20.8167	21.2057	20.8167	21.0312	4	4	4	4.8	4.8	4.8	114.77	0	4.2186	57960000	28	20.9073	20.6306	20.5566	20.2996	20.8074	20.9136	20.8029	20.6382	20.7562	21.0611	20.5669	20.9508	20.5493	20.6244	20.8748	20.5981	21.3537	20.8088	20.9567	20.8306
Q6P5E4	UDP-glucose:glycoprotein glucosyltransferase 1	Uggt1	0.254282	1.84564	0.0142679	+	0.0730832		24.2394	24.4161	24.323	24.1429	24.3083	24.1113	23.8256	24.1262	23.9187	24.1767	16	16	16	12.1	12.1	12.1	176.43	0	31.664	574040000	85	24.3983	24.3115	24.0086	24.4085	24.3953	24.4446	24.296	24.305	24.3681	24.2	24.1328	24.096	24.3766	24.3899	24.1585	24.098	24.0778	24.158	23.5659	23.9345
Q9CR68	Cytochrome b-c1 complex subunit Rieske, mitochondrial;Cytochrome b-c1 complex subunit 11	Uqcrfs1	0.175137	1.35651	0.044004	+	0.190196		21.0424	21.3541	21.3384	21.1284	21.3108	20.9561	21.0559	21.081	21.0203	21.1852	3	3	3	16.4	16.4	16.4	29.367	0	3.0031	68747000	3	20.9379	21.0645	21.1248	21.4741	21.4958	21.0924	21.3475	21.42	21.2478	20.7277	21.3634	21.2942	21.3484	21.2548	21.3293	20.9833	20.9378	20.9473	21.2602	20.8502
Q78IK2	Up-regulated during skeletal muscle growth protein 5	Usmg5	0.216467	1.78084	0.0165637	+	0.102422		20.9251	21.0266	20.943	20.8402	20.6827	20.6577	20.5936	20.5697	20.7143	20.7999	3	3	3	44.8	44.8	44.8	6.3814	0	3.8111	42977000	6	NaN	NaN	20.9251	20.9279	21.1253	NaN	20.9452	20.9358	20.9479	20.7201	NaN	20.9603	20.6579	20.6336	20.7566	20.8164	20.4865	20.6701	20.5234	20.709
Q01853	Transitional endoplasmic reticulum ATPase	Vcp	-0.237799	1.76032	0.0173653	+	0.0887516		25.6793	25.3264	25.6268	25.4967	25.6937	25.8147	25.9166	25.8446	25.6838	25.7522	25	25	25	36.6	36.6	36.6	89.321	0	323.31	1721500000	155	25.6216	25.5786	25.8377	25.5678	25.8515	24.5599	25.6107	25.5739	25.6958	25.4858	25.4311	25.5733	25.7078	25.7272	25.6459	25.8769	25.8994	25.6676	26.0067	25.8739
Q8BH43;B1AUN0;Q8R5H6	Wiskott-Aldrich syndrome protein family member 2;Wiskott-Aldrich syndrome protein family member 1	Wasf2;Wasf1	0.283594	1.61795	0.0241017	+	0.0727725		20.3972	20.5191	20.5509	20.4387	20.581	20.4818	20.2843	20.0911	19.9189	20.2928	2	2	2	4.6	4.6	4.6	54.073	0.0021023	1.8867	29889000	2	NaN	20.2354	20.559	NaN	20.3834	20.6547	NaN	NaN	20.5509	NaN	20.4321	20.4454	NaN	20.5089	20.6531	20.3033	20.187	20.9552	NaN	19.2161
Q9ERF3;D6RDC7;Q8BVQ0	WD repeat-containing protein 61;WD repeat-containing protein 61, N-terminally processed	Wdr61	0.355693	1.39283	0.040473	+	0.0655646		20.7712	20.6018	20.4788	20.5233	20.862	20.5894	20.3713	19.8261	20.3641	20.3077	3	3	3	14.8	14.8	14.8	33.772	0	3.0797	34352000	6	20.705	20.8374	NaN	20.8962	NaN	20.3074	NaN	20.1497	20.808	NaN	20.5576	20.4891	NaN	NaN	20.862	20.6567	20.3275	20.784	20.2716	20.5392
E9PUW7;Q9EPK7-2;Q9EPK7;A0A2I3BQV5	Exportin-7	Xpo7	0.157476	1.52343	0.0299617	+	0.202231		20.5854	20.5803	20.3617	20.3536	20.4554	20.4032	20.2749	20.3045	20.2156	20.3508	3	3	3	3.7	3.7	3.7	123.9	0	3.4808	38009000	8	NaN	20.4882	20.6826	20.5993	20.5506	20.591	20.2624	20.5597	20.2632	20.0421	20.5221	20.4968	20.3709	20.5788	20.4164	20.6404	20.1512	20.4181	20.5385	20.2874
F6YY69;F6VW30;P68254-2;P68254	14-3-3 protein theta	Ywhaq	0.2736	1.88091	0.013155	+	0.0624828		23.9575	24.091	23.9269	23.8776	24.0503	23.9565	23.7658	23.6311	23.4926	23.6893	9	6	6	36.1	29.5	29.5	32.221	0	11.873	463880000	45	23.7723	24.0745	24.0258	24.0086	24.0367	24.2277	24.2826	23.6329	23.8651	24.0271	23.8761	23.7297	23.8483	24.2039	24.0988	23.8891	24.0402	23.9402	23.8055	23.5078
O35215;G3UZN1;G3UYJ7	D-dopachrome decarboxylase	Ddt;Gm20441	0.396436	1.34248	0.045449		0.0604375		21.78	20.9758	21.3239	21.6923	21.3122	20.9629	21.2277	20.7337	21.1142	21.0635	3	3	3	46.6	46.6	46.6	13.077	0	6.0143	75642000	10	21.5011	21.5306	22.3084	NaN	21.0066	20.9451	20.9158	20.6861	22.3698	22.0063	21.6412	21.4293	21.6037	21.6914	20.6415	20.9619	21.1906	20.7364	21.3312	21.1217
Q8R379		Gimap7	0.26741	1.30727	0.0492868		0.107017		22.6256	23.286	23.0113	22.7914	22.8221	22.7222	22.6652	22.617	22.5745	22.6204	7	7	7	33.4	33.4	33.4	33.838	0	11.75	214770000	24	22.548	22.5699	22.759	23.0885	23.5835	23.1859	23.1586	22.7685	23.1067	22.6204	22.9127	22.8412	22.6974	23.0195	22.7493	21.3668	24.0088	22.7911	22.38	23.1382
Q9Z204-2;Q9Z204;Q9Z204-4;Q9Z204-3;Q9Z204-5;A0A2I3BRM6	Heterogeneous nuclear ribonucleoproteins C1/C2	Hnrnpc	-0.207644	1.34595	0.0450872		0.149227		25.6367	25.4483	25.5992	25.5487	25.5573	26.0709	25.6492	25.7616	25.6047	25.7419	11	11	11	37	37	37	33.056	0	49.486	1596100000	77	25.5512	25.6915	25.6673	25.2792	25.5184	25.5473	25.58	25.5435	25.674	25.5572	25.4827	25.606	25.6115	25.5318	25.5286	25.9915	26.1364	26.0848	25.7314	25.6859
A0A075B5P6;A0A075B6A0;P01872;P01872-2	Ig mu chain C region	Ighm	-0.381572	1.32419	0.0474034		0.0654017		19.9819	20.163	19.8849	19.9148	19.931	20.6747	20.481	20.4917	19.767	20.369	2	2	2	5.5	5.5	5.5	49.943	0	2.1955	33541000	9	20.3129	19.938	19.6947	20.3028	20.0226	20.1637	NaN	19.9934	19.7764	20.1685	19.6611	NaN	19.7472	19.9209	20.1249	20.5755	20.7524	20.6962	21.1152	20.1824
V9GXW3;V9GXF3;Q99JX7	Nuclear RNA export factor 1	Nxf1	-0.243391	1.3339	0.046355		0.118997		19.4102	19.7747	19.5477	19.3796	19.6316	20.0578	19.6744	19.815	19.6418	19.7718	2	2	2	8.9	8.9	8.9	31.964	0.0040623	1.7339	21682000	3	19.5108	19.3406	19.3791	20.0231	NaN	19.5263	NaN	19.7783	19.3172	19.2503	19.1878	19.7007	19.4957	NaN	19.7675	20.2322	20.1314	19.8098	19.7527	19.5668
Q9DBC7	cAMP-dependent protein kinase type I-alpha regulatory subunit;cAMP-dependent protein kinase type I-alpha regulatory subunit, N-terminally processed	Prkar1a	0.295209	1.33709	0.0460163		0.0916743		21.483	21.6611	21.8914	21.8886	21.9952	21.7352	21.3656	21.4004	21.3036	21.6385	3	3	3	10	10	10	43.185	0	3.4986	89781000	8	21.2821	21.2425	21.9245	21.5548	21.7675	NaN	NaN	21.9481	21.8348	21.75	22.3313	21.5845	NaN	21.6698	22.3206	21.6948	21.8126	21.6981	21.5689	21.0785
Q9QZM0	Ubiquilin-2	Ubqln2	0.226837	1.32266	0.0475706		0.133625		20.9007	21.2612	20.7748	20.9802	21.0809	20.61	20.792	20.7569	20.9323	20.7724	2	2	2	5.3	5.3	5.3	67.35	0.00072727	2.0599	58572000	4	20.7168	20.9449	21.0405	21.0019	21.1324	21.6493	20.6201	20.773	20.9315	20.925	20.9382	21.0773	20.8566	21.0752	21.3108	20.663	20.6804	20.4867	20.7388	20.8492
P43404	Tyrosine-protein kinase ZAP-70	Zap70	0.252623	1.3411	0.0455933		0.111966		22.2094	22.1386	21.813	22.0505	22.3151	21.6459	21.9906	21.9912	21.8319	21.8038	8	8	8	15.4	15.4	15.4	70.111	0	11.836	130380000	47	22.1985	21.9878	22.4418	22.1443	22.2329	22.0387	21.6325	21.8504	21.9561	21.9422	22.1027	22.1066	22.3035	22.2841	22.3576	22.3547	21.4929	21.0901	21.914	22.1176
A8Y5E9;B2KGA7;Q505B7-2;Q505B7	Protein archease	Zbtb8os	0.223489	1.34141	0.0455606		0.133925		20.4143	20.602	20.2949	20.6269	20.4636	20.4852	20.2173	20.0374	20.2512	20.2932	1	1	1	7.4	7.4	7.4	15.677	0	2.4536	34080000	8	20.4467	20.3837	20.4126	20.6599	NaN	20.5442	20.2949	NaN	NaN	20.6989	20.5447	20.637	20.3409	20.5717	20.478	20.5459	20.3521	20.5575	20.2376	20.197
F8WHU9;Q62384	Zinc finger protein ZPR1	Zpr1	-0.273044	1.30872	0.049122		0.103259		18.9776	19.1421	NaN	19.2467	19.3611	19.6651	19.479	19.3895	19.5472	19.1939	2	2	2	5.4	5.4	5.4	42.327	0.0014286	1.9617	16326000	2	18.4175	19.2974	19.2178	18.5717	19.3429	19.5117	NaN	NaN	NaN	19.2753	19.0887	19.3759	NaN	19.4207	19.3016	19.4247	20.2367	19.3339	19.4171	19.4599
A0A2R8VHX3;P58742;A0A2R8VI65	Aladin	Aaas	0.014275	0.0384205	0.915334		0.945734		20.3987	19.6817	20.049	19.8399	20.101	20.0241	20.0735	20.1003	19.8498	19.9512	2	2	2	12.6	12.6	12.6	20.983	0	2.7634	30466000	29	20.3977	20.5974	20.2011	NaN	NaN	19.6817	19.911	20.0917	20.1443	19.5769	20.1029	NaN	20.2124	20.1219	19.9687	20.1386	19.9329	20.001	20.1079	19.9027
Q9D2R0	Acetoacetyl-CoA synthetase	Aacs	-0.43469	0.908944	0.123326		0.108418		20.641	19.6729	20.9532	20.5861	20.9749	21.3058	20.8522	21.0885	20.8823	20.8728	2	2	2	2.8	2.8	2.8	75.199	0.0053476	1.6999	45624000	18	20.5676	20.7549	20.6003	20.5179	NaN	18.8278	NaN	20.3861	21.5204	20.269	20.2082	21.2812	21.9	20.6548	20.37	21.3143	21.2973	NaN	20.8522	NaN
B7ZD24;B7ZD25;Q9D2V5	Protein AAR2 homolog	Aar2	-0.425112	0.274048	0.53205		0.479895		18.6933	17.4431	19.2425	18.0693	18.4231	NaN	17.8904	18.3679	20.1398	NaN	1	1	1	26.2	26.2	26.2	4.7124	0.0094937	1.4473	7167500	1	NaN	NaN	18.6933	NaN	NaN	17.4431	NaN	19.2425	NaN	18.296	17.8425	NaN	18.8651	18.6296	17.7747	NaN	NaN	NaN	18.5311	18.5041
A0A087WNT3;B7ZCU2;B7ZCU5;B7ZCU4;B7ZCU3;A0A087WRS3;A0A087WPP8;Q6AXH6;B7ZCU0;J3QNK8;Q6AXD2;Q8CBW3-5;Q8CBW3-2;P62484;Q8CBW3-4;Q8CBW3-3;Q8CBW3;A0A087WR90;A0A087WP64;A0A087WPE6;A0A087WNU9	Abl interactor 1;Abl interactor 2	Abi2;Abi1	0.440404	0.29144	0.511163		0.45361		19.9781	NaN	20.1681	20.0201	NaN	20.1767	19.9646	20.2364	17.7403	19.9572	2	2	2	5	5	5	38.3	0.0047233	1.7257	22340000	11	19.8209	20.1353	NaN	NaN	NaN	NaN	19.8892	20.4471	NaN	20.1296	19.4732	20.4574	NaN	NaN	NaN	19.8185	20.4866	20.2249	20.2904	19.7342
Q5SWU9;Q5SWU9-2;D3Z0B3;V9GWS0;E9Q4Z2	Acetyl-CoA carboxylase 1;Biotin carboxylase;Acetyl-CoA carboxylase 2;Biotin carboxylase	Acaca;Acacb	0.219476	0.456587	0.349472		0.386986		19.7848	20.0823	20.0414	20.5661	20.1401	20.3692	19.4404	19.5449	20.2099	19.9528	4	4	4	2.1	2.1	2.1	265.25	0	3.2643	26175000	6	19.3301	19.9349	20.0895	NaN	20.0823	NaN	20.2018	NaN	19.8809	20.8246	20.3076	NaN	20.2243	NaN	20.0558	20.1544	20.0944	20.8589	NaN	19.7212
A0A3B2WAL8;G3XA25;Q8CAY6;Q80X81	Acetyl-CoA acetyltransferase, cytosolic	Acat2;Acat3	-0.462918	0.747797	0.178732		0.145513		21.4039	21.9681	21.6604	21.5993	21.887	21.6434	22.8877	22.1373	21.3904	22.7745	3	3	3	16	16	16	35.931	0	3.9975	141860000	18	21.3069	21.5009	NaN	21.9652	22.0374	21.9017	21.3308	21.8712	21.7792	21.7291	21.3781	21.6909	21.6802	NaN	22.0939	20.8114	22.0679	22.051	22.4422	23.0817
Q99KI0	Aconitate hydratase, mitochondrial	Aco2	-0.0717091	0.717616	0.191595		0.562072		25.1396	25.2317	25.3394	25.2007	25.208	25.252	25.1982	25.3133	25.4278	25.2867	20	20	20	34	34	34	85.462	0	85.643	1236700000	149	25.0747	25.0805	25.2636	25.1882	25.407	25.0999	25.348	25.3378	25.3324	25.1587	25.2193	25.2242	25.1393	25.298	25.1869	25.1941	25.3272	25.2347	25.3547	25.1743
Q91V12-2;E9PYH2;Q91V12-3;Q91V12-4;Q91V12	Cytosolic acyl coenzyme A thioester hydrolase	Acot7	-0.405613	1.04879	0.0893741		0.0917798		23.4851	23.1741	23.3174	23.6512	23.427	23.9867	24.1284	23.952	23.9648	23.0509	7	7	7	24.9	24.9	24.9	37.555	0	46.646	402110000	52	23.5393	23.7224	23.1936	23.2572	23.5783	22.6868	23.185	23.3885	23.3788	23.4102	24.088	23.4553	23.5818	23.0454	23.6538	24.1352	23.981	23.8438	24.0503	24.0746
Q561M1;Q9D358-2;Q9D358;A0A1W2P7X3	Low molecular weight phosphotyrosine protein phosphatase	Acp1	0.270187	0.48033	0.33088		0.338964		20.8146	20.4273	20.6272	20.8588	21.7029	21.116	20.4445	20.3743	20.385	20.7601	2	2	2	14.6	14.6	14.6	17.922	0	14.747	33376000	7	NaN	20.4158	21.2135	20.4273	NaN	NaN	20.5046	NaN	20.7498	21.1703	NaN	20.5474	NaN	21.7029	NaN	21.0489	21.1831	NaN	20.4445	NaN
Q9QUJ7-2;Q9QUJ7	Long-chain-fatty-acid--CoA ligase 4	Acsl4	-0.528971	0.808969	0.15525		0.115027		20.2797	20.1889	20.539	20.6694	20.2303	22.1167	20.1704	20.6413	20.8002	20.8235	4	4	4	6.3	6.3	6.3	74.338	0	3.3577	49899000	11	NaN	20.3428	20.2166	20.4737	19.7108	20.3822	20.592	20.8653	20.1596	20.6624	20.0887	21.2572	21.0594	19.4012	NaN	21.6312	22.6423	22.0766	20.7268	19.1496
P60710;E9Q1F2;E9Q5F4;G3UZ07	Actin, cytoplasmic 1;Actin, cytoplasmic 1, N-terminally processed	Actb;Actg1	0.125695	0.624238	0.237554		0.4247		32.835	32.7711	33.1824	33.1881	33.0548	32.8289	33.0588	32.7956	32.8722	32.8475	33	33	2	96.3	96.3	4.8	41.736	0	323.31	293030000000	3403	33.1019	32.6452	32.7578	32.7835	32.7967	32.7332	33.4963	33.1196	32.9312	33.3705	33.0089	33.1848	33.2162	32.9401	33.0082	32.7626	32.8068	32.9172	33.1321	32.9964
P68033;P68134;P63268;P62737;A0A1D5RM20;D3Z2K3;D3YZY0	Actin, alpha cardiac muscle 1;Actin, alpha skeletal muscle;Actin, gamma-enteric smooth muscle;Actin, aortic smooth muscle	Actc1;Acta1;Actg2;Acta2	0.587239	0.708142	0.19582		0.137877		29.3353	28.996	28.8109	29.1915	28.8212	27.6352	28.6513	29.218	29.3417	27.3725	20	5	5	58.6	25.7	25.7	42.019	0	323.31	19041000000	188	29.1855	29.5751	29.2451	29.7352	27.9667	29.2861	27.9268	29.2083	29.2978	29.2025	28.9081	29.4639	29.8842	27.1702	29.4093	26.5085	29.2027	27.1944	29.3235	27.652
P63260	Actin, cytoplasmic 2;Actin, cytoplasmic 2, N-terminally processed	Actg1	0.0247051	0.0447136	0.902166		0.930795		26.3099	26.9307	26.5499	26.8124	27.1729	26.6133	27.1048	26.733	26.8472	26.354	32	1	1	96	4.5	4.5	41.792	0	323.31	4818800000	146	27.1201	27.5291	24.2806	26.9912	26.9111	26.8898	26.1936	26.7528	26.7032	26.8541	26.7628	26.8202	27.0085	27.154	27.3562	26.8021	26.7119	26.3259	26.642	27.3801
Q8R5C5;E0CZD4;E0CYB4;P61164	Beta-centractin;Alpha-centractin	Actr1b;Actr1a	0.252801	0.382169	0.414793		0.41931		21.8341	20.648	NaN	21.2701	21.2589	20.9039	21.6688	20.9911	20.761	20.6751	2	2	2	8.2	8.2	8.2	42.281	0	10.592	69526000	11	22.2126	21.2495	22.0402	NaN	20.7377	20.5583	NaN	NaN	NaN	21.1125	21.4124	21.2854	21.4318	NaN	21.086	20.9552	20.8519	20.9046	21.1235	21.821
P28474	Alcohol dehydrogenase class-3	Adh5	0.0594074	0.417699	0.382209		0.669583		23.0792	22.9441	23.0035	23.0464	22.9383	23.0757	22.7876	23.0256	23.0044	22.8211	7	7	7	24.1	24.1	24.1	39.547	0	8.7974	253770000	39	23.1266	23.1044	23.0067	22.8885	23.1218	22.8219	23.2413	22.9671	22.802	22.8257	23.3378	22.9756	22.9621	22.8357	23.0171	23.1759	22.4356	23.6156	23.0604	22.211
A0A286YCD7;P55264-2;P55264;A0A286YCN3	Adenosine kinase	Adk	0.0142174	0.0559356	0.879153		0.938649		20.5168	20.7953	20.8154	20.4967	20.555	20.6543	20.47	20.7864	20.5147	20.6825	2	2	2	10.2	10.2	10.2	22.914	0.005277	1.6627	39182000	6	20.4448	20.5888	NaN	20.7961	20.9989	20.5909	20.5457	21.1042	20.7961	20.5566	20.3432	20.5902	20.3868	20.7232	NaN	20.854	20.4546	NaN	20.47	NaN
Q7TS64;Q99MK8;F6QY34;E9PW16;Q8BVT9;Q3UYH7	Beta-adrenergic receptor kinase 1;Beta-adrenergic receptor kinase 2	Adrbk1;Adrbk2	-0.135399	0.333834	0.463624		0.550053		20.4654	20.7136	20.5123	20.4441	20.4551	21.0307	20.0536	20.8446	20.7904	20.5481	2	2	2	5.4	5.4	5.4	75.153	0	2.1982	41813000	8	NaN	20.5301	20.4006	20.9092	20.7639	20.4676	NaN	20.7814	20.2432	20.521	20.233	20.5783	20.202	20.7213	20.4421	21.0991	20.9879	21.0052	20.4902	20.7282
P54822;E9Q3T7;E9Q242	Adenylosuccinate lyase	Adsl	-0.187675	0.770625	0.16958		0.281541		22.0685	22.4544	21.9645	22.3113	21.868	22.3521	22.3223	22.5068	22.2893	22.1346	5	5	5	13.4	13.4	13.4	54.866	0	6.0021	151070000	28	22.102	21.596	22.5074	22.3981	22.42	22.5452	21.9747	22.2103	21.7085	22.2865	22.1219	22.5254	21.9427	21.6424	22.019	22.5995	22.6287	21.8281	22.7702	22.2338
P46664	Adenylosuccinate synthetase isozyme 2	Adss	0.185115	0.277197	0.528205		0.553533		20.9722	20.4137	20.9553	20.7727	20.8315	20.9759	21.3366	20.6123	20.2451	19.8499	3	3	3	8.3	8.3	8.3	50.02	0	3.3913	45980000	7	NaN	NaN	20.9722	19.3403	20.8192	21.0817	21.3259	20.6633	20.8766	NaN	NaN	20.7727	20.8522	20.8297	20.8124	20.8893	20.5745	21.4637	21.6735	21.2931
E9PX77;F8WGT1;Q68FL4	Adenosylhomocysteinase;Putative adenosylhomocysteinase 3	Ahcyl2	-0.205914	0.622341	0.238593		0.312901		19.9901	19.8259	NaN	19.5887	19.8048	20.3184	20.1362	19.8491	NaN	19.7293	1	1	1	7.5	7.5	7.5	16.247	0.0076923	1.5389	11228000	2	NaN	19.9901	NaN	NaN	NaN	19.8259	NaN	NaN	NaN	NaN	NaN	19.5887	NaN	NaN	19.8048	20.2445	20.4818	20.2291	20.1362	NaN
Q8BK64	Activator of 90 kDa heat shock protein ATPase homolog 1	Ahsa1	-0.0269485	0.0918602	0.809356		0.890042		22.1748	21.8508	21.8916	21.5443	21.7298	21.7762	21.808	21.8923	21.9308	21.9189	5	5	5	21	21	21	38.117	0	7.0602	112490000	15	21.9977	22.3519	NaN	21.8432	21.8844	21.8249	21.7315	21.9775	21.9658	22.3303	22.2059	20.0966	21.8247	21.8741	21.4908	20.9669	22.3375	22.0243	21.6112	21.791
B1AU25;Q9Z0X1	Apoptosis-inducing factor 1, mitochondrial	Aifm1	0.172097	0.547049	0.28376		0.384648		21.0478	21.2021	21.2838	20.8419	20.97	20.4898	20.7777	20.8888	21.1626	21.1661	4	4	4	10.2	10.2	10.2	66.113	0	4.882	62544000	12	21.0294	20.9276	21.1863	21.1373	21.1234	21.3456	21.3099	21.3046	21.2369	20.7723	21.6447	20.1087	20.9479	21.0263	20.9357	20.8019	20.0087	20.6589	20.8417	20.986
Q8R3V2;Q8R010	Aminoacyl tRNA synthase complex-interacting multifunctional protein 2	Aimp2	0.363146	0.634952	0.231765		0.217252		22.2768	21.6929	21.6725	21.3518	21.2956	21.2475	21.4587	21.4172	20.507	21.8435	2	2	2	9.3	9.3	9.3	31.097	0	3.1815	78778000	20	22.0061	NaN	22.5475	21.4973	21.7299	21.8516	NaN	21.6725	NaN	21.0174	21.3396	21.6983	21.1037	21.4784	21.3046	21.1558	21.5262	21.0605	21.4544	21.6447
O08915	AH receptor-interacting protein	Aip	-0.189646	0.516666	0.304322		0.378488		20.9148	21.4611	21.2675	21.3085	21.5311	21.9503	21.23	21.3232	21.2911	21.6368	3	3	3	10	10	10	37.605	0	4.1198	84006000	15	20.4598	20.4232	21.8615	21.388	21.602	21.3934	21.1211	21.2542	21.4273	21.3381	21.5415	21.0459	21.4512	21.5234	21.6188	22.4621	21.8777	21.511	21.49	21.1183
Q9WTP6-2;Q9WTP6	Adenylate kinase 2, mitochondrial;Adenylate kinase 2, mitochondrial, N-terminally processed	Ak2	0.104108	0.69771	0.200581		0.452749		23.6284	24.0187	23.8976	23.9206	23.8988	23.9003	23.6989	23.7779	23.7015	23.765	8	8	5	48.3	48.3	31.5	25.605	0	77.438	472710000	97	23.9697	23.72	23.1953	24.0211	23.9778	24.0574	23.8525	23.8976	23.9426	23.8351	23.8851	24.0417	23.8967	23.9021	23.8975	24.0439	23.8665	23.7904	23.7818	23.711
Q9DBR0	A-kinase anchor protein 8	Akap8	0.10661	0.207702	0.619866		0.680094		20.1229	20.2633	19.1724	20.0682	19.9141	19.6054	20.047	19.7525	19.7186	19.8844	2	2	2	3.8	3.8	3.8	76.293	0	4.1894	24695000	15	20.5448	19.8808	19.9431	NaN	NaN	20.2633	19.1724	NaN	NaN	19.828	20.1575	20.219	19.8421	19.9862	NaN	19.626	19.4427	19.7475	19.9641	19.9941
Q9JII6	Alcohol dehydrogenase [NADP(+)]	Akr1a1	0.272905	0.475879	0.334288		0.340373		22.0657	22.4952	22.1816	22.6323	22.3756	22.4168	22.3512	22.3213	22.188	21.1086	4	4	4	15.7	15.7	15.7	36.586	0	40.627	159430000	21	22.2724	21.6055	22.3191	22.3763	22.6914	22.4179	22.1525	21.9973	22.3951	22.8937	22.243	22.7602	22.5037	22.2486	22.3746	22.4272	22.7326	22.0906	22.3541	22.6658
P45376;D3YVJ7	Aldose reductase	Akr1b1;Akr1b3	0.178982	0.699011	0.199981		0.31412		23.4736	24.1481	23.9075	23.9633	23.9263	23.8276	23.8074	23.6984	23.4689	23.7215	4	4	4	12.3	12.3	12.3	35.732	0	131.55	464440000	63	23.8825	23.3873	23.1511	24.3167	24.0846	24.0429	23.9367	23.8273	23.9585	23.9946	23.8904	24.0048	23.8051	23.9963	23.9776	23.9966	23.6835	23.8027	23.7498	23.7069
Q9Z110-2;Q9Z110	Delta-1-pyrroline-5-carboxylate synthase;Glutamate 5-kinase;Gamma-glutamyl phosphate reductase	Aldh18a1	-0.243281	1.13519	0.0732511		0.146375		21.4492	21.6643	21.7949	21.8252	21.5298	21.6052	22.1758	21.8913	21.9709	21.8366	6	6	6	13	13	13	87.052	0	18.637	105270000	22	21.3809	21.5865	21.3802	21.735	21.3785	21.8793	21.9531	21.6409	21.7907	21.8388	21.8639	21.773	21.8437	20.9356	21.8101	21.3795	21.7302	21.7059	22.1943	22.0542
Q9JLJ2;Q3U367	4-trimethylaminobutyraldehyde dehydrogenase	Aldh9a1	0.159714	0.823349	0.150193		0.306882		21.8914	22.0566	22.2186	22.332	22.3956	22.0982	22.0175	21.9162	22.1176	21.9462	6	6	6	17.4	17.4	17.4	53.514	0	14.181	143390000	43	22.3963	20.9483	22.3296	22.1312	21.756	22.2827	22.2148	22.1219	22.319	22.3215	22.4086	22.2658	22.1559	22.5377	22.4932	21.7203	22.5187	22.0555	22.0027	22.0049
Q810B6;Q810B6-2	Rabankyrin-5	Ankfy1	0.00351562	0.0125318	0.971557		0.984894		20.1559	20.5664	20.4191	20.344	20.7022	20.4827	20.4542	20.4559	20.378	20.3992	2	2	2	2.1	2.1	2.1	128.65	0.0040706	1.7403	38892000	2	20.6661	20.4765	19.3249	20.5685	20.5751	20.5555	20.377	20.4726	20.4077	20.2924	20.2993	20.4404	20.7022	NaN	NaN	20.6364	20.4825	20.3292	20.5105	20.4946
B2RXR6;E9QNQ2;J3QK13	Serine/threonine-protein phosphatase 6 regulatory ankyrin repeat subunit B	Ankrd44	0.164348	1.27948	0.052544		0.217018		22.08	21.9765	21.8177	22.1261	22.1151	21.9487	21.8638	21.791	21.734	21.9562	7	7	7	8.5	8.5	8.5	107.38	0	9.5666	120590000	35	21.836	22.1035	22.3005	21.7438	22.2774	21.9084	21.7776	21.938	21.7374	22.1668	22.1373	22.0741	22.3295	22.2478	21.7682	21.9128	22.0853	21.8481	22.0212	21.7943
O35381;D3YYE1;D3Z7M9;F6UFG6	Acidic leucine-rich nuclear phosphoprotein 32 family member A	Anp32a	0.0818924	0.497129	0.318325		0.576364		25.2304	25.5308	25.2234	25.219	25.4218	25.3644	25.1108	25.2263	25.2163	25.2981	7	7	6	29.1	29.1	25.9	28.537	0	323.31	1419800000	82	25.1787	25.3523	25.1603	25.4476	25.6436	25.5011	25.3172	25.1057	25.2472	25.079	25.2132	25.3649	25.2957	25.4636	25.5061	25.5939	25.3056	25.1937	25.2153	25.0598
Q9EST5;Q9EST5-2	Acidic leucine-rich nuclear phosphoprotein 32 family member B	Anp32b	0.112195	0.143881	0.717991		0.74384		25.6754	25.2041	25.5129	26.1379	25.5393	24.838	25.9755	25.705	24.934	26.0561	5	4	4	30.5	27.6	27.6	31.078	0	323.31	1652300000	56	25.8863	24.9904	26.1494	26.2569	23.8699	25.4857	25.2331	25.4983	25.8072	25.9534	26.217	26.2432	25.3473	25.5997	25.671	25.1407	24.6072	24.7661	25.7014	26.044
P48036	Annexin A5	Anxa5	0.0593369	0.0848126	0.822598		0.857061		23.0346	22.1677	23.0918	23.5665	22.8417	23.2007	23.1399	22.6672	22.7014	22.6963	7	7	7	18.5	18.5	18.5	35.752	0	8.9813	271710000	45	22.9291	22.8938	23.2809	22.9933	20.7175	22.7923	23.4583	23.1697	22.6473	23.3868	23.427	23.8856	23.2476	22.6231	22.6546	23.0573	23.1618	23.383	22.9839	21.7583
P14824	Annexin A6	Anxa6	0.577478	0.426512	0.374531		0.299336		21.8688	19.3164	20.195	19.992	NaN	20.3296	19.9112	19.0703	19.7512	NaN	29	1	1	55.1	6.1	6.1	75.884	0.0040761	1.7447	24875000	2	22.168	21.5695	NaN	19.468	19.1647	NaN	NaN	NaN	20.195	20.8344	19.1496	NaN	NaN	NaN	NaN	21.0487	19.4534	20.4865	19.4638	20.4812
A0A2C9F2D2;Q07076	Annexin A7	Anxa7	0.435624	0.711956	0.194108		0.162797		23.0899	22.8514	22.3392	22.864	21.9225	22.3401	22.3103	22.4008	21.3015	22.5361	8	8	8	20.8	20.8	20.8	52.27	0	17.097	183290000	29	23.3905	22.8937	22.9857	23.3204	22.5991	22.6345	22.4543	21.8086	22.7546	22.9957	23.4214	22.1748	22.479	21.3548	21.9336	21.1282	22.7717	23.1204	22.5604	22.716
Q5SVG5;Q5SVG4;O35643	AP-1 complex subunit beta-1	Ap1b1	-0.359556	0.426911	0.374187		0.340377		22.6599	21.9812	23.1526	22.8901	23.5561	23.7966	22.4671	23.729	23.4104	22.6346	13	3	3	19.7	7.5	7.5	101.19	0	51.552	327260000	7	NaN	22.6544	22.6655	22.7584	20.1733	23.0121	22.6148	22.515	24.3279	23.1042	23.2172	22.3489	22.6052	24.1837	23.8795	26.3488	22.7039	22.3372	21.9009	22.4442
Q8CBB7;P22892	AP-1 complex subunit gamma-1	Ap1g1	-0.345178	1.03488	0.0922836		0.10927		19.4612	20.2377	20.3703	20.2927	20.1811	20.4702	20.6197	20.5856	20.3806	20.2128	2	2	2	2.8	2.8	2.8	91.721	0	4.0048	30097000	14	20.4693	20.4735	17.4409	20.2377	NaN	NaN	20.4014	20.4762	20.2334	19.7384	20.8471	NaN	20.3126	20.0495	NaN	20.636	20.1341	20.6406	20.6657	20.5315
P35585;S4R1Q4;A0A1D5RLW6;D3YZ71;A0A0R4IZX6;A0A0R4J1L4;Q9WVP1;Q9WVP1-2	AP-1 complex subunit mu-1;AP-1 complex subunit mu-2	Ap1m1;Ap1m2	0.324406	0.361615	0.434895		0.408773		20.0839	19.3719	19.4766	19.8334	20.6487	20.2457	19.9192	18.3924	19.8304	19.4047	2	2	2	4.7	4.7	4.7	48.542	0	2.26	25013000	5	20.9038	19.2639	NaN	17.9512	20.2381	19.9264	19.9934	18.9597	NaN	19.6975	NaN	19.9693	20.1625	NaN	21.1349	20.6307	19.9488	20.1576	20.0939	19.6701
P17427	AP-2 complex subunit alpha-2	Ap2a2	0.014772	0.0394907	0.913081		0.945319		23.2767	22.5411	23.2099	22.9701	23.0687	22.9792	23.0234	22.9966	23.0555	22.9378	15	15	10	23.7	23.7	16.1	104.02	0	49.713	259500000	76	23.3453	23.1579	23.3269	23.1217	21.3797	23.1218	23.3799	23.1582	23.0914	23.1038	23.1042	22.7024	23.079	23.0713	23.0557	22.906	23.0718	22.9598	23.1052	23.0198
H3BIY9;Q9DBG3;Q9DBG3-2;H3BKM0	AP complex subunit beta;AP-2 complex subunit beta	Ap2b1	0.0347164	0.147495	0.712042		0.843265		24.7858	24.3506	24.5589	24.777	24.7261	24.5133	24.6213	24.6728	24.6913	24.5261	14	14	4	19.1	19.1	7.3	104.83	0	49.412	834920000	64	24.8492	24.8531	24.655	24.9147	24.5691	23.5678	24.5877	24.1638	24.9252	24.8457	24.7048	24.7805	24.7604	24.7069	24.711	24.3905	25.0796	24.0698	24.6072	24.6795
Q3TWV4;P84091;A0A338P6T4	AP-2 complex subunit mu	Ap2m1	-0.123768	0.415302	0.384324		0.515429		20.6705	21.1842	21.0214	21.0076	20.6513	21.1514	21.281	20.9283	20.9879	20.8053	3	3	3	12.9	12.9	12.9	49.389	0	2.2693	60236000	3	19.9988	20.8885	21.1241	NaN	21.1842	NaN	21.1827	20.9418	20.9398	20.7507	20.8109	21.4612	20.1531	20.9192	20.8815	21.1336	21.3027	21.0178	21.1253	21.3252
A0A0R4J107;Q8R146-2;Q8R146	Acylamino-acid-releasing enzyme	Apeh	0.524126	0.513067	0.306855		0.244138		21.2789	20.6431	21.43	20.8902	21.1885	21.6543	21.4847	20.218	19.1552	20.2979	3	3	3	5.9	5.9	5.9	79.704	0	4.0225	62835000	12	21.5904	21.1562	21.0903	20.3294	20.3366	21.2634	21.253	21.1028	21.9342	21.0199	20.9862	20.6646	20.2302	21.9583	21.3771	21.3493	21.9594	NaN	21.9475	21.1933
F6QA74;P28352;D3Z124;D3Z6R9	DNA-(apurinic or apyrimidinic site) lyase;DNA-(apurinic or apyrimidinic site) lyase, mitochondrial	Apex1	-0.117843	0.39808	0.399871		0.537077		21.8418	22.1917	21.8827	21.5007	21.5563	21.7701	21.8963	21.9828	21.8819	22.0312	4	4	4	17.6	17.6	17.6	32.318	0	3.7096	116310000	13	21.779	21.883	21.8633	21.8511	22.2795	22.4444	22.0109	21.7901	21.8471	21.4705	21.2448	21.7868	21.2523	21.6932	21.7234	22.3632	20.8196	22.1275	21.9887	21.8727
O35841	Apoptosis inhibitor 5	Api5	-0.0171898	0.108776	0.778438		0.909083		23.1258	23.2872	23.2342	23.19	23.2015	23.418	23.1669	23.2571	23.147	23.1357	9	9	9	26	26	26	56.784	0	16.796	294170000	54	23.4154	22.9001	23.0619	23.1809	23.5287	23.1519	23.1912	23.3744	23.1369	23.2248	23.074	23.2713	23.2201	23.2138	23.1705	23.362	23.5752	23.3167	23.4495	23.1526
Q8K4Z3	NAD(P)H-hydrate epimerase	Apoa1bp	0.250574	0.396962	0.400902		0.410075		20.4042	NaN	20.8898	21.2288	NaN	20.9501	20.5728	NaN	20.6508	20.1876	2	2	2	16	16	16	30.972	0	2.8492	19858000	5	NaN	19.8478	20.9605	NaN	NaN	NaN	NaN	20.8898	NaN	21.5906	NaN	20.8669	NaN	NaN	NaN	NaN	20.9501	NaN	20.6079	NaN
Q3U5C5;E9QMH1;Q99J72-3;Q99J72-4;Q99J72-2;Q99J72;Q3TI69;H3BJJ6;H3BJD1	DNA dC->dU-editing enzyme APOBEC-3	Apobec3	-0.0172543	0.0375664	0.917136		0.944902		22.9422	23.0974	23.2765	23.4693	23.4526	23.5644	23.4752	23.2921	23.1181	22.8745	8	8	8	26.3	26.3	26.3	47.422	0	10.457	315310000	38	23.6307	22.6262	22.5696	23.4118	23.009	22.8713	23.4349	23.0558	23.3389	23.2089	23.5769	23.6221	23.0584	23.8019	23.4975	23.2898	23.9708	23.4325	23.6631	23.0802
Q5XJY5	Coatomer subunit delta	Arcn1	-0.216883	0.901742	0.125389		0.21643		23.02	22.8844	22.6174	22.9276	22.8573	23.3231	23.1204	22.6878	23.0521	23.2076	6	6	6	12.3	12.3	12.3	57.229	0	11.465	270790000	47	23.1294	22.8741	23.0566	22.9719	22.878	22.8032	22.5564	22.5061	22.7896	23.0322	22.927	22.8236	22.6409	23.0435	22.8874	23.465	23.4731	23.0312	23.1239	23.0749
Q8BSL7;P84078;P61205	ADP-ribosylation factor 2;ADP-ribosylation factor 1;ADP-ribosylation factor 3	Arf2;Arf1;Arf3	-0.0734138	0.28771	0.515573		0.677466		23.8929	23.7096	23.9914	23.616	23.7582	23.5529	23.9808	23.8379	23.9302	24.0334	4	2	2	33.1	16	16	20.746	0	110.29	549750000	89	23.6212	23.977	24.0804	23.749	23.7215	23.6583	24.1575	23.9677	23.8491	23.8705	23.7025	23.2751	23.8998	23.6664	23.7084	23.7589	23.9476	22.9522	23.8046	24.1609
P84084	ADP-ribosylation factor 5	Arf5	0.29599	0.722737	0.189349		0.212135		23.651	23.5937	24.2704	23.7379	23.9433	23.7098	23.0884	23.8491	23.2024	23.8665	5	5	2	37.2	37.2	12.2	20.529	0	6.6015	471430000	44	23.8266	23.6063	23.5203	23.3452	23.7204	23.7155	24.3749	24.3157	24.1206	23.9182	23.7382	23.5572	23.6913	24.3083	23.8303	23.7738	23.7728	23.5827	23.4826	21.9903
P62331	ADP-ribosylation factor 6	Arf6	0.0508114	0.0988622	0.796412		0.847771		21.9851	22.1865	22.2542	21.8352	21.6484	22.0337	22.0709	22.052	21.3215	22.1773	3	3	3	30.3	30.3	30.3	20.082	0	5.0935	128330000	29	22.031	22.0149	21.9094	21.8789	22.2854	22.3952	21.9698	22.6894	22.1036	21.7016	22.08	21.724	21.3106	21.7297	21.9049	22.1922	22.038	21.8708	22.1028	22.169
A2AH25;Q5FWK3	Rho GTPase-activating protein 1	Arhgap1	0.760279	0.894394	0.127528		0.0751599		21.8264	22.0163	22.1695	22.3925	22.081	22.4324	20.194	21.6788	20.4279	21.9512	5	5	5	14.2	14.2	14.2	54.437	0	5.2341	121310000	26	21.7623	21.69	22.0269	22.2422	22.0462	21.7606	22.3855	21.8815	22.2415	22.4329	22.1388	22.6058	22.3233	21.7366	22.183	22.534	22.4326	22.3306	22.4037	16.8348
Q99PT1	Rho GDP-dissociation inhibitor 1	Arhgdia	0.132937	0.664762	0.21639		0.400008		25.9939	25.8084	25.6058	25.6958	25.7896	25.7332	25.6731	25.4577	25.5011	25.8636	7	7	7	56.9	56.9	56.9	23.407	0	323.31	1704700000	62	25.8394	25.9662	26.1761	25.7291	25.9263	25.7699	25.6794	25.3214	25.8165	25.7412	25.824	25.5222	25.7943	25.886	25.6884	25.6794	25.792	25.7284	25.6915	25.6437
E9PUF7;Q61210-2;Q61210;Q61210-5;Q61210-4;F6ZN61;Q61210-3	Rho guanine nucleotide exchange factor 1	Arhgef1	-0.11945	0.333188	0.464314		0.571649		22.5005	22.2445	22.5256	22.5856	22.398	22.0031	22.6375	22.7745	22.7102	22.726	7	7	7	10.3	10.3	10.3	108.69	0	32.677	175180000	29	22.6635	22.5405	22.2976	22.357	21.6586	22.7179	22.7599	22.4529	22.3639	22.9477	22.2144	22.5945	22.6121	22.065	22.517	21.9807	21.6003	22.4284	22.995	22.28
Q9WUL7	ADP-ribosylation factor-like protein 3	Arl3	0.124516	0.187229	0.649787		0.684976		20.759	20.0092	20.1687	19.9841	20.295	20.4867	20.4002	20.317	20.1332	19.2563	2	2	2	12.6	12.6	12.6	20.486	0	3.0359	37162000	19	NaN	21.0138	20.5042	19.9627	20.6315	19.4335	20.0114	20.185	20.3099	19.5537	20.1975	20.201	20.32	19.9121	20.6529	20.635	20.4615	20.3637	20.3843	20.4758
Q9D7A8	Armadillo repeat-containing protein 1	Armc1	-0.111115	0.198838	0.632648		0.684228		19.7735	19.8167	20.4129	NaN	20.1203	19.9407	20.2097	19.6405	20.4098	20.5093	2	2	2	15.6	15.6	15.6	31.246	0	2.4643	18407000	5	NaN	19.3005	20.2466	19.9269	19.1649	20.3584	NaN	20.3549	20.471	NaN	NaN	NaN	20.2215	NaN	20.019	19.6841	20.1972	NaN	20.2097	NaN
P59999	Actin-related protein 2/3 complex subunit 4	Arpc4	0.230466	0.850548	0.141076		0.216535		26.4198	25.9415	25.8498	26.1717	25.9616	25.9024	26.1391	25.5693	25.8836	25.6976	10	10	10	70.2	70.2	70.2	19.667	0	138.35	2195700000	73	26.4717	26.7744	26.0134	26.0148	25.8069	26.0028	25.9775	25.9295	25.6423	26.181	26.2422	26.0919	25.9165	25.7963	26.1719	25.61	26.0471	26.0501	25.9323	25.9273
Q9D898	Actin-related protein 2/3 complex subunit 5-like protein	Arpc5l	-0.211834	0.304305	0.496244		0.510182		21.7756	21.847	21.5502	20.2705	21.5166	21.4536	21.6011	21.8893	21.5142	21.5607	1	1	1	7.8	7.8	7.8	16.98	0.0082961	1.5201	66256000	6	21.9525	NaN	21.5987	21.847	NaN	NaN	21.1868	21.6257	21.8381	20.3172	18.987	21.5073	21.4491	21.5218	21.5788	21.0495	21.7528	21.5585	NaN	21.6011
A0A0R4J138;P50429-2;P50429	Arylsulfatase B	Arsb	-0.257466	0.0744237	0.842512		0.833414		19.6949	20.7819	20.4182	21.9732	17.2209	21.7099	18.6238	20.4922	NaN	NaN	2	2	2	4.9	4.9	4.9	59.704	0	2.3228	21835000	6	NaN	20.5391	18.8507	NaN	NaN	20.7819	NaN	20.4182	NaN	NaN	22.115	21.8314	NaN	17.208	17.2338	NaN	21.7099	NaN	NaN	NaN
Q9WV54	Acid ceramidase;Acid ceramidase subunit alpha;Acid ceramidase subunit beta	Asah1	-0.0816348	0.343552	0.453365		0.632715		19.4143	19.8869	NaN	19.7294	19.8908	19.857	19.8196	19.7467	19.8814	19.7552	2	2	2	5.6	5.6	5.6	44.669	0.008872	1.4629	23560000	2	NaN	19.5461	19.2826	19.6945	19.8482	20.1179	NaN	NaN	NaN	19.7893	19.6205	19.7784	19.9689	19.8428	19.8608	19.836	19.8857	19.8492	19.8828	19.6987
O54984	ATPase Asna1	Asna1	0.0406642	0.0197987	0.955435		0.955358		19.6181	17.9771	18.1082	19.9185	NaN	19.7849	17.8363	18.9515	20.043	17.7083	2	2	2	5.5	5.5	5.5	38.822	0.0053086	1.6827	14217000	9	NaN	18.9016	20.3345	17.9771	NaN	NaN	17.0691	19.1473	NaN	20.0234	19.9148	19.8174	NaN	NaN	NaN	20.3286	19.9466	19.0794	18.3082	18.2676
Q9CPX6	Ubiquitin-like-conjugating enzyme ATG3	Atg3	0.378343	0.633347	0.232623		0.213426		20.0125	19.7172	19.7234	19.4384	19.6135	19.7295	19.9638	18.8436	NaN	18.7537	2	2	2	7.3	7.3	7.3	35.796	0	2.5262	20223000	12	20.0793	20.315	19.6433	19.6532	19.7811	NaN	19.4294	19.771	19.9697	19.7112	19.1656	NaN	19.8295	19.4034	19.6075	20.0543	19.9194	19.2149	20.0521	19.7909
Q9CWJ9	Bifunctional purine biosynthesis protein PURH;Phosphoribosylaminoimidazolecarboxamide formyltransferase;IMP cyclohydrolase	Atic	-0.0102131	0.0761196	0.839229		0.942852		25.1697	25.1324	25.1051	24.9466	25.0769	25.1863	25.1412	25.0389	25.0254	25.0898	19	19	19	51.2	51.2	51.2	64.217	0	114.68	1148400000	183	25.1373	25.14	25.2316	25.1339	25.1292	25.1339	25.0777	25.1244	25.1132	24.8413	24.996	25.0025	24.9707	25.1214	25.1386	25.2672	25.4279	24.8638	25.1104	25.1641
Q8C2Q8;A2AKU9;Q91VR2;A2AKV1;A2AKV2;A2AKV3	ATP synthase subunit gamma;ATP synthase subunit gamma, mitochondrial	Atp5c1	-0.0491657	0.102511	0.789748		0.846789		22.4319	23.15	23.4904	23.0051	23.1356	23.1053	22.953	23.0321	23.2043	23.1641	6	6	6	21.5	21.5	21.5	30.255	0	18.319	278230000	46	22.9469	21.5551	22.7937	23.4722	23.1818	22.7959	23.9104	23.3547	23.206	23.0438	22.9726	22.9989	23.1322	23.3333	22.9415	23.1369	23.0274	23.1515	23.1921	22.9291
Q9CQQ7;A0A0G2JGX3	ATP synthase F(0) complex subunit B1, mitochondrial	Atp5f1	0.26727	0.850548	0.141076		0.18873		22.7253	23.1746	23.1674	23.1431	22.5833	22.5953	22.9552	22.7613	22.8009	22.3445	4	4	4	16.4	16.4	16.4	28.948	0	3.487	236570000	11	22.7536	22.2318	23.1904	22.9085	23.1067	23.5085	22.8389	23.5876	23.0757	23.0655	23.3415	23.0223	23.0187	21.5747	23.1565	22.1986	23.0338	22.5537	23.0482	22.89
Q06185;Q8BTB6	ATP synthase subunit e, mitochondrial	Atp5i;Atp5k	0.404964	0.791492	0.161625		0.145992		20.733	21.8395	22.0808	21.8294	21.684	20.7758	21.2113	21.3247	21.4354	21.3946	3	3	3	50.7	50.7	50.7	8.2355	0	3.4135	84801000	18	21.7252	21.3339	19.1399	21.9118	21.7916	21.815	NaN	22.3107	21.8509	21.2919	21.9657	22.2305	21.9016	21.643	21.5075	20.7807	20.7317	20.8152	21.0521	21.29
F8WHP8;P56135	ATP synthase subunit f, mitochondrial	Atp5j2	-0.191381	0.239267	0.576412		0.589646		20.5747	19.8861	20.5382	21.5753	21.4784	20.9656	21.1032	21.0031	21.2251	20.7125	2	2	2	31.6	31.6	31.6	9.0054	0.0021142	1.9014	62342000	6	21.1307	18.9718	21.6215	18.7056	19.8917	21.0609	21.5926	NaN	19.4837	21.5454	21.6417	21.5389	21.8726	NaN	21.0841	20.9684	21.0223	20.9062	21.1529	21.1477
Q9CPQ8	ATP synthase subunit g, mitochondrial	Atp5l	0.317212	0.986927	0.103056		0.129444		20.8241	21.5054	21.6554	21.258	21.3004	20.7678	21.185	20.7412	21.0656	21.1977	3	3	3	42.7	42.7	42.7	11.424	0	3.5598	63033000	6	21.0358	20.6519	20.7846	21.4297	NaN	21.5811	NaN	21.6554	NaN	21.5259	21.0137	21.2343	21.219	21.2717	21.4105	20.8614	20.6743	NaN	20.931	21.5838
Q9DB20;A0A338P776	ATP synthase subunit O, mitochondrial	Atp5o	0.0593433	0.439732	0.363302		0.664411		23.8473	24.1052	23.94	23.7891	23.9339	23.817	23.8193	23.8165	23.9686	23.8974	6	6	6	35.2	35.2	35.2	23.363	0	22.005	475400000	54	23.8533	24.0148	23.6738	24.4868	24.0179	23.811	23.9956	23.914	23.9103	23.7324	23.8836	23.7512	24.0669	23.7993	23.9355	23.806	23.7138	23.9311	23.7427	23.8902
P51863	V-type proton ATPase subunit d 1	Atp6v0d1	0.600324	0.490693	0.323077		0.247735		21.5241	20.9746	20.9032	21.3982	20.7608	20.4616	21.8019	18.7581	19.9982	21.5394	4	4	4	19.1	19.1	19.1	40.301	0	8.6657	74647000	21	21.5833	21.4528	21.5364	20.8793	21.2792	20.7653	20.8922	20.856	20.9614	21.5362	21.5931	21.0652	19.2947	21.627	21.3606	19.0799	21.0461	21.2586	23.1545	21.7184
P50516-2;P50516;D3Z1B9	V-type proton ATPase catalytic subunit A	Atp6v1a	-0.254445	0.946997	0.11298		0.172196		21.4447	20.7564	21.4565	21.1882	21.4966	21.5085	21.4825	21.5792	21.6134	21.4309	3	3	3	7.9	7.9	7.9	55.594	0	3.4717	83695000	21	21.3582	21.4293	21.5465	21.3586	20.4578	20.4527	21.3694	21.5246	21.4754	21.2122	21.71	20.6423	21.1613	22.0277	21.3008	21.8007	21.2272	21.4977	21.446	21.6137
P62814;Q91YH6	V-type proton ATPase subunit B, brain isoform	Atp6v1b2;Atp6v1b1	-0.146556	0.399478	0.398586		0.490304		20.6428	21.0314	20.7926	20.4638	20.8948	21.2631	20.867	20.4868	20.8421	21.0991	4	4	4	10.2	10.2	10.2	56.55	0	8.7428	58292000	27	20.9369	20.4968	20.4946	21.2124	21.095	20.7868	20.774	21.0563	20.5475	20.4955	20.6836	20.2122	20.9137	20.8472	20.9235	21.4032	21.18	21.2062	21.2192	20.5067
Q9CR51	V-type proton ATPase subunit G 1	Atp6v1g1	-0.0528957	0.0723222	0.846599		0.877058		20.4762	21.0918	20.3826	20.2529	20.6699	20.8661	20.9066	20.9403	20.6584	19.7666	1	1	1	12.7	12.7	12.7	13.724	0	4.8245	34912000	8	20.5161	20.4362	NaN	21.6772	NaN	20.5064	20.2519	20.5452	20.3507	NaN	20.2529	NaN	NaN	20.6699	NaN	20.8568	20.8249	20.9166	20.8592	20.6494
A0A0U1RPL0;Q7TQH0-3;Q7TQH0;Q7TQH0-2;E9Q5Q0;Q3TGG2	Ataxin-2-like protein	Atxn2l	0.0124985	0.0193049	0.956522		0.966946		20.4379	20.579	20.6017	21.2367	20.689	21.0978	20.713	21.0649	20.2935	20.3128	4	4	4	10	10	10	115.26	0	4.1422	49365000	11	20.8848	19.5016	20.9275	20.6003	NaN	20.5577	20.6623	20.7587	20.3843	21.1983	21.2751	NaN	20.7685	20.877	20.4214	20.8752	21.0305	21.3876	20.5964	20.8164
G3UXT8;G3UYQ2;A0A1B0GX81;G3UZT6;Q3UF95;Q9Z1R2	Large proline-rich protein BAG6	Bag6	-0.0434456	0.0604288	0.870104		0.897434		20.0896	20.0775	19.9657	20.0718	20.141	20.3064	20.4957	20.2234	19.1074	20.4299	3	3	3	6	6	6	59.313	0	4.595	29364000	17	20.065	20.1978	20.0059	NaN	20.32	19.835	20.1552	19.7762	NaN	19.9694	19.9762	20.2697	20.0102	20.028	20.3848	20.049	20.5207	20.3496	20.4957	NaN
O54962	Barrier-to-autointegration factor;Barrier-to-autointegration factor, N-terminally processed	Banf1	-0.582096	0.400767	0.397405		0.320946		21.9544	20.1763	22.5312	23.105	23.3198	22.1349	23.6531	21.956	23.2785	22.9747	4	4	4	58.4	58.4	58.4	10.102	0	57.099	254430000	19	20.4243	21.9067	23.5323	22.1098	NaN	18.2428	22.0248	23.167	22.4017	21.7433	23.8282	23.7433	23.1536	24.0797	22.7263	22.606	21.5881	22.2107	23.0131	24.0744
A0A1B0GX27;O35855;A0A1B0GQY4;O88374	Branched-chain-amino-acid aminotransferase, mitochondrial;Branched-chain-amino-acid aminotransferase	Bcat2	0.018246	0.0359081	0.920644		0.945075		19.097	NaN	19.4578	19.3856	18.5821	19.0955	19.1532	19.1372	19.1505	19.0256	2	2	2	5.2	5.2	5.2	43.493	0.0071708	1.6051	15690000	6	18.9672	19.1802	19.1437	NaN	NaN	NaN	19.295	19.6207	NaN	19.2516	19.1335	19.7718	19.1941	19.2381	17.3142	19.0244	19.005	19.257	19.2711	19.0185
A0A087WRN1;A0A087WQA0;F8WI22;Q8K019-3;Q8K019-2;Q8K019	Bcl-2-associated transcription factor 1	Bclaf1	1.02882	0.34008	0.457004		0.355068		16.4855	17.2132	21.5736	19.1298	16.352	19.344	16.4646	NaN	15.8832	16.7962	3	3	3	6.3	6.3	6.3	67.703	0	2.3387	10156000	3	16.5314	NaN	16.4396	NaN	16.9037	17.5227	21.5736	NaN	NaN	17.1237	NaN	21.1358	16.0106	16.8277	16.2177	16.9588	21.7293	NaN	16.3722	16.5467
Q8R016;E9PY26	Bleomycin hydrolase	Blmh	0.334567	1.16731	0.0680288		0.0951192		23.8724	23.6575	23.675	23.9991	23.7478	23.5237	23.8263	23.6391	22.9841	23.3058	7	7	7	21.1	21.1	21.1	52.511	0	10.543	393460000	28	23.9935	23.6773	23.9463	23.6414	23.6514	23.6798	23.4529	23.9192	23.6529	23.9153	24.2411	23.8409	23.8842	23.3009	24.0582	24.0346	23.4347	23.1017	23.7037	23.604
Q9CY64	Biliverdin reductase A	Blvra	0.144757	0.321681	0.476781		0.548861		21.8796	21.6192	21.1223	21.3978	21.4824	21.6431	21.6284	21.2202	21.4385	20.8473	4	4	4	16.3	16.3	16.3	33.524	0	4.387	88945000	19	21.6452	22.5086	21.4848	21.6495	21.6526	21.5554	21.3908	21.6634	20.3129	21.4441	21.1585	21.5909	21.3746	21.7051	21.3675	21.35	21.6246	21.9548	21.6243	21.9185
Q8BGS2-2;Q8BGS2	BolA-like protein 2	Bola2	-0.174496	0.429507	0.371957		0.439989		20.9647	21.2708	20.8523	20.8101	21.274	21.3994	21.3151	21.416	21.3188	20.5952	2	2	2	55.6	55.6	55.6	6.3291	0.0034106	1.7678	68319000	2	20.7944	NaN	21.135	21.2657	21.3131	21.2337	20.8739	20.9154	20.7677	20.7778	20.5427	21.1098	21.2475	21.2901	21.2845	22.3318	20.9854	20.881	21.1534	21.2493
P97452	Ribosome biogenesis protein BOP1	Bop1	-0.0990612	0.4294	0.372049		0.556282		20.746	20.5964	20.5268	20.259	20.3012	20.596	20.4341	20.5218	20.7362	20.6367	3	3	3	3.8	3.8	3.8	82.545	0	2.5304	45326000	27	20.7848	20.4988	20.9542	20.6268	20.6018	20.5608	20.3556	20.5017	20.7231	20.3431	20.1693	20.2648	NaN	20.2	20.4024	20.5357	20.6782	20.5741	20.5545	20.1313
Q9DCA5;E9Q2V8	Ribosome biogenesis protein BRX1 homolog	Brix1	-0.140339	1.08675	0.0818937		0.290644		21.4385	21.0854	21.1271	21.2867	21.2687	21.3111	21.3987	21.3159	21.485	21.3975	2	2	2	6.8	6.8	6.8	41.241	0	2.8038	81343000	39	21.4952	21.3432	21.4771	21.1117	21.5114	20.6332	20.9209	21.3584	21.1021	21.3596	21.4226	21.078	21.2472	21.5292	21.0297	21.2466	21.4974	21.1893	21.2974	21.5834
Q64152-2;Q64152	Transcription factor BTF3	Btf3	-0.138419	0.126218	0.747794		0.755665		22.3669	21.7048	22.5489	22.5516	22.8082	23.2415	23.4328	22.5804	21.4963	21.9216	3	3	3	43.8	43.8	43.8	17.699	0	21.605	180810000	8	22.4802	22.2537	NaN	21.7048	NaN	NaN	22.2806	22.7981	22.5682	22.5491	NaN	22.5541	21.9864	23.0457	23.3924	23.6046	22.9478	23.1723	23.1096	23.438
A0A140LHA2;Q9WVA3	Mitotic checkpoint protein BUB3	Bub3	0.269394	1.18932	0.0646661		0.120144		22.7676	23.1586	23.1897	23.2841	23.4162	23.0643	22.7528	22.7906	23.0267	22.8349	7	7	7	39.5	39.5	39.5	36.766	0	13.091	265590000	28	22.8026	22.7752	22.7249	23.1857	23.0961	23.194	23.6538	23.4711	22.4442	23.164	23.0927	23.5957	23.2984	23.9152	23.0352	23.0753	23.2624	22.8552	22.9786	22.7841
Q6PGH1;Q6PGH1-2	Protein BUD31 homolog	Bud31	-0.24621	0.471377	0.337771		0.35943		19.5987	19.7225	19.9437	19.7067	18.7287	NaN	19.7811	19.7321	19.8273	19.8045	2	2	2	12.5	12.5	12.5	17	0.0071429	1.5842	19477000	2	19.6605	19.5369	NaN	19.7225	NaN	NaN	19.811	20.0765	NaN	19.6746	19.6936	19.7518	19.7391	NaN	17.7183	NaN	NaN	NaN	19.8592	19.6992
A0A087WQS2;Q9CQC6;A0A087WPF9	Basic leucine zipper and W2 domain-containing protein 1	Bzw1	-0.0914104	0.344915	0.451945		0.609288		23.4435	23.4614	23.3307	23.2075	23.2856	23.7596	23.4768	23.425	23.4273	23.0971	7	7	7	20	20	20	51.209	0	25.764	334990000	42	23.4307	23.523	23.3766	23.1643	23.6905	23.5292	23.1175	23.5931	23.2816	23.054	23.3947	23.1739	23.3672	23.038	23.4517	23.944	23.864	23.4709	23.5659	23.1961
Q91VK1;A0A1Y7VKZ4	Basic leucine zipper and W2 domain-containing protein 2	Bzw2	-0.257187	0.836466	0.145725		0.199931		19.6702	19.9673	19.3751	19.8906	19.8931	20.2698	19.8674	20.0819	20.2234	19.6397	2	2	2	3.8	3.8	3.8	48.063	0.0065317	1.6198	26624000	2	19.769	19.594	19.6476	20.0683	19.8004	20.0331	19.8557	18.69	19.5796	19.6534	NaN	20.1279	20.0375	19.8413	19.8005	20.4007	19.9462	20.4623	20.0653	19.854
Q8R5L1;O35658	Complement component 1 Q subcomponent-binding protein, mitochondrial	C1qbp	0.193171	1.08216	0.0827631		0.205668		24.4711	24.1603	24.1374	24.0864	24.3068	23.8662	24.1554	23.8934	24.1981	24.083	5	5	5	27.2	27.2	27.2	31.025	0	26.175	598990000	46	24.5097	24.4275	24.4761	24.1309	24.1485	24.2016	23.8304	24.2845	24.2973	24.2145	24.0756	23.9691	24.1528	24.3905	24.377	23.7545	24.2312	23.6128	24.0579	24.2005
Q06138	Calcium-binding protein 39	Cab39	-0.271572	0.256401	0.554114		0.539262		21.1565	20.2956	19.919	20.9618	19.9708	20.4338	21.798	20.5648	21.1876	19.6773	4	4	4	17.9	17.9	17.9	39.842	0	16.319	58220000	6	21.6352	20.8455	20.9889	21.0059	20.4584	19.4224	19.6355	20.1017	20.0197	21.5474	20.3815	20.9564	19.956	20.4413	19.5151	20.274	21.4121	19.6152	20.4638	22.7566
Q6ZQ38	Cullin-associated NEDD8-dissociated protein 1	Cand1	-0.0713646	0.733057	0.184902		0.561109		24.1422	24.1507	23.9003	24.0602	24.0519	24.1617	24.1306	24.1101	24.0729	24.1868	15	15	15	17.5	17.5	17.5	136.33	0	309.08	559700000	133	24.1246	24.1352	24.1668	24.0795	24.2572	24.1152	23.7341	24.0014	23.9654	24.1755	23.9066	24.0984	23.9247	24.0776	24.1533	24.0128	24.3611	24.1112	24.2807	24.0918
A0A0R4J1C2;A0A0R4IZW8;O88456	Calpain small subunit 1	Capns1	0.375551	0.922209	0.119616		0.121069		21.7593	21.6817	21.5121	21.5282	21.5589	21.8082	20.9263	21.3117	21.5	20.6162	3	3	3	21	21	21	22.924	0	27.986	83932000	15	21.4682	22.2061	21.6035	21.6103	21.8036	21.6314	NaN	21.4102	21.614	21.4169	21.1762	21.9914	21.6532	21.2087	21.8148	21.5018	22.2474	21.6755	21.3819	20.0334
Q60865	Caprin-1	Caprin1	-0.151511	0.474102	0.335659		0.441888		22.4832	22.6589	22.7403	22.6097	22.7362	22.3365	22.6997	23.0835	22.772	23.0942	3	3	3	4.8	4.8	4.8	78.168	0	6.1945	212930000	51	22.6348	22.1858	22.629	22.479	22.7983	22.6996	22.6936	22.6826	22.8448	22.2905	22.7218	22.8167	22.5609	22.7761	22.8715	23.2447	20.8066	22.9581	22.8145	22.6368
P47754;D6RCW7	F-actin-capping protein subunit alpha-2	Capza2	0.213224	0.853364	0.140164		0.231311		25.153	24.6926	25.1284	25.077	25.1091	25.1104	24.8484	24.7446	24.508	24.8824	11	11	9	65	65	55.6	32.967	0	211.12	996410000	83	24.9727	24.9908	25.4954	24.8598	25.1195	24.0984	25.0459	25.0447	25.2944	25.1048	25.0172	25.109	25.1327	25.1593	25.0353	25.0728	25.0939	25.1645	25.2202	24.6603
P47757-2;A2AMW0;P47757-4;P47757	F-actin-capping protein subunit beta	Capzb	0.131062	0.610796	0.245021		0.418904		24.8998	25.3855	25.2077	25.217	25.1812	25.2577	25.1551	24.8798	24.9708	24.9725	10	10	10	51.8	51.8	51.8	30.628	0	138.5	1123300000	60	24.7827	25.159	24.7578	25.4709	25.2635	25.4221	25.2244	25.1896	25.2092	25.1255	25.2049	25.3206	25.2049	25.3909	24.9478	25.4342	25.1125	25.2265	24.9964	24.8277
Q9ER72-2;Q9ER72	Cysteine--tRNA ligase, cytoplasmic	Cars	-0.338226	0.491752	0.322291		0.30216		19.4878	19.4987	19.5218	NaN	20.1055	20.4954	20.394	19.0643	20.1033	19.9014	2	2	2	2.8	2.8	2.8	85.55	0.0053298	1.6926	23829000	7	NaN	19.4338	19.5418	20.6261	18.3714	NaN	19.5218	NaN	NaN	NaN	NaN	NaN	20.1028	19.993	20.2207	20.4496	20.9065	20.1302	20.2908	20.4373
P70677	Caspase-3;Caspase-3 subunit p17;Caspase-3 subunit p12	Casp3	-0.00308723	0.00726815	0.983404		0.987786		23.7089	23.7118	23.501	23.5166	23.5469	23.6547	23.0637	23.758	23.7317	23.7925	9	9	9	49.8	49.8	49.8	31.474	0	12.952	386920000	50	23.925	23.4558	23.7459	23.717	23.6948	23.7237	23.4358	23.6196	23.4475	23.4995	23.6605	23.3898	23.454	23.7696	23.4171	23.5518	23.8079	23.6043	23.7863	21.9873
Q8VDP4	Cell cycle and apoptosis regulator protein 2	Ccar2	0.103825	0.365688	0.430836		0.576966		21.5811	21.3804	21.2607	21.6315	21.5802	21.561	21.5726	21.0929	21.1747	21.5135	4	4	4	5.1	5.1	5.1	103	0	4.9854	83080000	26	21.3232	21.839	NaN	21.336	21.3782	21.4271	21.3454	21.1756	21.261	21.6691	21.4392	21.7863	21.7853	21.5657	21.3896	21.7932	21.3611	21.5289	21.6217	21.3744
P80316	T-complex protein 1 subunit epsilon	Cct5	-0.113363	0.427594	0.373599		0.529432		25.5336	25.4428	25.5249	25.5914	25.4198	25.2045	25.8773	25.7134	25.5391	25.745	19	19	19	51.6	51.6	51.6	59.623	0	323.31	1538200000	103	25.2411	25.371	25.9886	25.6368	25.4513	25.2402	25.505	25.4052	25.6646	25.7311	25.4043	25.6388	25.387	25.744	25.1283	24.3403	25.5908	25.6824	25.6025	26.1007
P08920	T-cell surface antigen CD2	Cd2	-0.0744019	0.144652	0.716717		0.772157		22.5364	22.9108	22.6978	22.7424	22.6003	22.9816	22.0659	22.9181	22.7532	23.1409	2	2	2	6.7	6.7	6.7	38.414	0	63.466	237850000	41	22.4813	22.5115	22.6164	22.7061	22.8437	23.1825	22.6025	22.6465	22.8444	22.5998	22.6593	22.9679	22.7674	22.44	22.5937	22.8491	23.022	23.0736	22.8611	20.7247
P22646	T-cell surface glycoprotein CD3 epsilon chain	Cd3e	1.05236	0.593242	0.255128		0.152042		20.2648	21.0461	21.6802	23.0575	22.6377	21.1225	19.1038	19.0249	22.3701	21.8033	2	2	2	15.9	15.9	15.9	21.393	0	11.026	104390000	10	19.6393	23.0633	18.0919	17.9927	23.258	21.8877	NaN	21.6802	NaN	22.2469	23.471	23.4545	NaN	23.5812	21.6941	20.4052	20.9023	22.0599	17.3267	17.4158
G3X8W7;A0A0R4J1W7;Q8BGZ4	Cell division cycle protein 23 homolog	Cdc23	1.07516	0.92001	0.120224		0.0580842		19.6024	18.8567	18.8794	18.7437	18.9818	15.6781	18.9593	17.983	18.9336	18.1341	2	2	2	3.3	3.3	3.3	65.877	0.00072939	2.0676	12543000	5	20.2947	19.3883	19.1242	NaN	18.8567	NaN	18.7308	18.7919	19.1155	19.0167	19.1916	18.0227	18.6604	19.1174	19.1676	NaN	15.6781	NaN	17.9167	18.8076
Q61081	Hsp90 co-chaperone Cdc37;Hsp90 co-chaperone Cdc37, N-terminally processed	Cdc37	-0.0621246	0.321787	0.476665		0.686434		23.9342	24.1158	23.6587	23.9203	23.8041	23.8533	23.9304	23.9904	23.9141	24.0555	7	7	7	25.9	25.9	25.9	44.593	0	13.779	495490000	67	23.7782	24.0131	24.0115	24.082	24.1463	24.119	23.9063	23.3335	23.7362	23.8332	23.8615	24.0664	23.8653	23.7776	23.7693	23.8555	24.0105	23.694	24.0329	23.7891
P60766;P60766-1	Cell division control protein 42 homolog	Cdc42	0.298634	1.21891	0.060407		0.102326		24.095	23.7391	23.5448	23.6552	23.438	23.5745	23.2834	23.3191	23.5894	23.2125	6	5	5	37.2	31.4	31.4	21.258	0	16.513	382690000	31	23.6793	24.9675	23.6381	23.8147	23.7519	23.6509	23.7268	23.7364	23.171	23.7165	23.76	23.4891	23.4362	23.4788	23.3991	23.5218	23.7122	23.4896	23.5134	22.7444
A2A9P6;P24788-2;P24788;Q64434	Cyclin-dependent kinase 11B;Protein-tyrosine kinase 6	Cdk11b;Ptk6	-0.191299	0.290662	0.512081		0.537876		19.8441	18.4576	19.9097	19.6489	19.3013	19.7326	19.7143	19.3096	19.5849	19.7767	2	2	2	2.1	2.1	2.1	87.319	0.0052805	1.6634	18461000	4	NaN	19.4847	20.2035	19.5199	19.676	16.177	20.007	19.8124	NaN	19.5669	19.731	NaN	NaN	19.0148	19.5878	19.5968	NaN	19.8683	19.5581	20.2428
A0A0R4J0T5;P28659-2;P28659-3;P28659;P28659-4	CUGBP Elav-like family member 1	Celf1	0.0771576	0.14914	0.709349		0.765022		20.3764	20.6989	20.9664	20.4992	20.8383	21.1153	20.4661	20.079	20.6357	20.6974	4	3	3	8.4	6.4	6.4	52.178	0	5.6891	49773000	37	21.1602	18.9575	21.0114	20.7481	NaN	20.6497	21.0486	20.8981	20.9526	20.4981	21.065	19.9345	20.9855	20.8421	20.6874	21.0922	20.9255	21.3282	20.7845	20.2403
A0A0R4J2B0;V9GX43;S4R2U7;S4R1S7;E9QA47;Q9Z0H4-11;Q9Z0H4-7;Q9Z0H4-5;Q9Z0H4-4;Q9Z0H4;Q9Z0H4-8;Q9Z0H4-2;Q9Z0H4-6;Q9Z0H4-9;S4R2J2;S4R2L5;A3KGT0;S4R2S7	CUGBP Elav-like family member 2	Celf2	0.332168	0.662644	0.217448		0.21743		22.5674	23.8941	23.6877	23.7394	23.7519	23.3258	23.0944	23.0892	23.1559	23.3145	6	6	5	17	17	14.8	46.607	0	59.314	340350000	36	23.7086	20.4661	23.5275	23.9302	23.9795	23.7725	23.5026	23.5491	24.0114	23.7248	23.7671	23.7264	23.7176	23.8347	23.7033	23.3663	23.5742	23.0369	23.0694	23.2521
Q9D8B3	Charged multivesicular body protein 4b	Chmp4b	-0.869801	0.799138	0.158804		0.0904744		20.3965	19.1101	21.2467	19.767	20.588	21.1322	20.5589	22.188	19.8048	21.7736	2	2	2	12.1	12.1	12.1	24.936	0	5.1204	61142000	6	20.7439	20.1761	20.2696	21.0059	NaN	17.2143	21.554	21.2661	20.9201	19.8719	19.5534	19.8759	20.464	20.712	NaN	20.6756	22.1435	20.5775	19.507	NaN
Q9D1P4;A0A1L1SU22	Cysteine and histidine-rich domain-containing protein 1	Chordc1	-0.0248917	0.0472962	0.896817		0.928609		22.471	22.4524	22.3528	21.8615	22.4664	22.4918	22.7672	22.2222	22.3538	21.8938	5	5	5	20.2	20.2	20.2	37.35	0	6.7691	164560000	15	22.5226	22.3756	22.515	22.4521	22.4504	22.4547	22.3069	22.5043	22.2473	22.2464	22.1954	21.1429	22.6759	22.4596	22.2638	22.2822	22.5882	22.6049	22.5953	22.766
D3Z0U4;Q9JKP8	Chromatin accessibility complex protein 1	Chrac1	-0.0103664	0.0139729	0.968338		0.975611		19.4918	19.5403	18.2538	19.5336	19.3482	19.1923	19.3192	19.3695	19.0633	19.2752	2	2	2	35.1	35.1	35.1	10.129	0	2.3019	15730000	3	19.6196	19.4492	19.4066	19.4839	19.5631	19.5739	NaN	NaN	18.2538	19.4718	19.8368	19.2921	19.455	19.1655	19.4242	19.328	19.1324	19.1165	19.3192	NaN
Q9QYB1	Chloride intracellular channel protein 4	Clic4	-0.17487	0.408296	0.390574		0.452331		22.3827	21.3064	21.7648	21.9742	21.9173	22.0268	22.1828	22.1756	22.1025	21.732	4	4	4	21.7	21.7	21.7	28.729	0	4.7501	129640000	11	23.1633	21.9312	22.0537	22.0981	20.2512	21.57	21.738	21.6749	21.8814	22.2297	22.1589	21.534	21.8524	21.9958	21.9038	22.0945	22.0934	21.8925	22.3765	22.0174
Q5SUH7;Q5SUH6;Q99KN9;Q99KN9-2	Clathrin interactor 1	Clint1	0.209969	0.222049	0.599723		0.603267		21.3077	21.7582	20.8727	21.6252	20.8613	21.8767	21.6856	20.297	20.2877	21.2282	4	4	4	8.2	8.2	8.2	67.73	0	4.2817	75327000	14	21.2816	21.3338	NaN	21.7974	21.8146	21.6625	21.4424	19.82	21.3558	21.3723	21.2094	22.2938	21.3504	21.2959	19.9376	21.6055	22.1824	21.8424	21.8703	21.6459
Q923F1;Q61189	Methylosome subunit pICln	Clns1a	-0.00551682	0.0163266	0.963105		0.978776		21.0274	20.6512	20.4811	20.353	20.5657	20.64	20.5699	20.6149	20.6015	20.6798	1	1	1	5.4	5.4	5.4	26.522	0	2.5369	32464000	10	NaN	NaN	21.0274	NaN	NaN	20.6512	20.3798	NaN	20.5823	20.3486	20.3575	NaN	NaN	20.4307	20.7007	20.4535	NaN	20.8265	NaN	20.5032
B1AWE0;Q6PFA2;B1AWE1;B1AWD8;B1AWD9;O08585	Clathrin light chain A	Clta	0.0871815	0.559548	0.27571		0.541714		22.9972	23.1477	22.9043	22.8632	23.1128	22.835	23.0387	23.0001	22.7762	22.9394	3	3	3	19.9	19.9	19.9	23.478	0	57.14	242990000	16	23.1032	22.8999	22.9886	23.0809	23.0364	23.3258	23.0183	22.8667	22.8281	22.752	22.8727	22.9649	23.0103	23.0565	23.2717	23.1047	22.8969	22.5033	22.7394	23.0797
Q5SXR6;Q68FD5	Clathrin heavy chain;Clathrin heavy chain 1	Cltc	-0.0340347	0.321732	0.476726		0.787216		26.7496	26.826	26.6793	26.6393	26.716	26.872	26.7794	26.6866	26.7273	26.7152	39	39	39	31.3	31.3	31.3	191.98	0	323.31	3406900000	283	26.7338	26.7158	26.7993	26.8007	26.8671	26.8102	26.5772	26.7528	26.7079	26.6183	26.5859	26.7137	26.6457	26.7114	26.791	26.6683	26.9539	26.9937	26.8531	26.8295
B7ZWL1;A0A1D5RMJ8;Q6ZQ08-2;Q6ZQ08;Q6ZQ08-4;A0A1D5RMD8	CCR4-NOT transcription complex subunit 1	Cnot1	0.379774	0.502707	0.314263		0.281517		20.252	21.3412	20.5247	20.8151	21.1554	20.6459	21.458	20.1984	20.1416	19.7457	4	4	4	1.7	1.7	1.7	260.95	0	3.2548	54988000	11	21.2168	19.8214	19.7178	22.1411	22.1116	19.771	20.6193	20.734	20.2209	21.187	20.4809	20.7774	20.9555	20.8704	21.6402	20.5592	20.5537	20.8247	21.043	21.0181
Q8VEG6-3;Q8VEG6-2;Q8VEG6;D3YXZ0	CCR4-NOT transcription complex subunit 6-like	Cnot6l	-0.139958	0.50236	0.314514		0.445092		21.3994	21.7373	21.4598	21.4126	21.3679	21.4522	21.6444	21.4679	21.4721	22.04	2	2	2	5.1	5.1	5.1	49.396	0.0027816	1.8464	78381000	20	21.265	21.4661	21.467	NaN	21.4217	22.0528	NaN	21.4282	21.4914	21.3133	21.4862	21.4382	21.3018	21.1499	21.6518	21.2852	21.5113	21.56	21.8393	21.4952
Q9D8X5;A2AFQ7	CCR4-NOT transcription complex subunit 8	Cnot8	0.105791	0.504756	0.312784		0.510046		19.6855	19.5517	19.7937	19.3621	19.4059	19.2654	19.5787	19.4914	19.4093	19.5252	2	2	2	7.5	7.5	7.5	33.574	0.0040733	1.7405	15366000	3	19.6561	NaN	19.7149	19.638	NaN	19.4655	19.5344	NaN	20.053	19.3754	NaN	19.3487	19.224	19.5158	19.478	19.2705	19.2603	NaN	NaN	19.7293
Q9JIF7	Coatomer subunit beta	Copb1	-0.147925	0.453056	0.352326		0.454963		22.7968	23.0568	22.5875	22.5899	22.5172	22.7396	23.2149	22.8697	22.9332	22.5305	13	13	13	23.1	23.1	23.1	107.06	0	35.352	225760000	60	22.584	22.8313	22.9752	23.3843	22.783	23.003	22.6476	22.2126	22.9022	22.5048	22.4953	22.7696	22.3753	22.1812	22.9953	22.542	22.9264	22.7505	22.8319	23.6467
O55029	Coatomer subunit beta	Copb2	-0.143293	0.692549	0.202979		0.371708		23.7748	23.6834	23.2831	23.6239	23.4395	23.8961	23.5933	23.7227	23.6898	23.6191	12	12	12	15.8	15.8	15.8	102.45	0	24.428	399670000	77	23.6569	23.8086	23.859	23.6301	23.9232	23.4968	23.469	23.6175	22.7627	23.6468	23.6923	23.5326	23.4997	23.3988	23.42	24.1047	23.7704	23.8132	23.78	23.2847
D3Z315;O89079;F6YFR7	Coatomer subunit epsilon	Cope	0.0632885	0.181221	0.658839		0.75777		21.7806	21.288	21.658	21.5495	21.7819	21.3358	21.8084	21.3794	21.4299	21.7881	4	4	4	38.8	38.8	38.8	25.37	0	5.1952	98303000	24	21.7694	21.4887	22.0837	20.9092	21.4227	21.5321	21.5823	21.5806	21.8111	21.4181	21.6421	21.5884	21.6206	21.7078	22.0174	21.633	20.9442	21.4302	21.8414	21.4419
A2AQE4;P61202;P61202-2	COP9 signalosome complex subunit 2	Cops2	-0.264699	0.151412	0.705648		0.686003		NaN	18.2489	20.0975	20.8227	20.4261	20.2032	20.4915	19.1779	20.7814	NaN	2	2	2	6.2	6.2	6.2	46.913	0	3.8409	21103000	8	NaN	NaN	NaN	18.2489	NaN	NaN	NaN	NaN	20.0975	20.7578	20.6057	21.1046	20.6801	NaN	20.1721	20.2954	20.0173	20.2969	NaN	20.2999
O88544;F6QTS1;D3YV99	COP9 signalosome complex subunit 4	Cops4	0.138628	0.500642	0.315761		0.447741		21.0539	21.0012	21.0032	21.4152	20.8003	21.0085	21.1275	20.8377	20.9627	20.6444	6	6	6	21.4	21.4	21.4	46.284	0	14.92	66710000	27	21.1263	21.0052	21.0301	21.2007	20.9155	20.8873	21.0737	20.7512	21.1849	21.4792	21.1653	21.6012	20.9039	20.9147	20.5821	20.7992	21.1958	21.0303	21.2277	20.9134
O35864	COP9 signalosome complex subunit 5	Cops5	-0.0885323	0.371814	0.424802		0.60327		20.8609	20.5235	20.5255	20.581	20.3251	20.5522	20.8624	20.5276	20.6179	20.6986	3	3	3	9.9	9.9	9.9	37.548	0	5.2234	46912000	17	20.7824	20.7632	21.037	20.3287	20.4812	20.7607	20.5645	20.5118	20.5002	20.6378	20.5243	NaN	20.1132	20.3445	20.5176	20.6493	20.705	20.3024	20.9471	20.9545
P61924;A0A2R8VJV3;Q8R3M1	Coatomer subunit zeta-1	Copz1	0.101332	0.694302	0.202161		0.46163		22.6624	22.5381	22.6114	22.6586	22.7248	22.5574	22.4214	22.3711	22.5956	22.743	4	4	4	35	35	35	20.198	0	5.7238	201610000	25	22.7409	22.3449	22.9014	22.4544	22.5238	22.636	22.7778	22.3308	22.7255	22.5749	22.4334	22.9675	22.8296	22.8433	22.5015	22.4493	22.6175	22.6054	22.587	22.1954
Q9WUM3;D3YUG6	Coronin-1B;Coronin	Coro1b	0.112364	0.292411	0.510022		0.607206		20.5285	20.7835	21.4383	21.0935	21.0695	21.0247	20.7502	20.9401	20.75	20.8865	3	3	3	6	6	6	53.912	0	2.4272	56720000	10	20.8192	20.0651	20.7013	NaN	21.0683	20.4986	21.7274	21.1492	NaN	20.8155	21.4035	21.0614	21.1675	21.0393	21.0017	20.913	20.9517	21.2094	20.987	20.7905
B1AVH5;Q8C0P5	Coronin;Coronin-2A	Coro2a	-0.15197	0.363694	0.432819		0.510234		20.3364	20.4497	19.5798	20.3458	20.466	20.6584	20.4584	20.3487	20.2393	20.2327	3	3	3	6.8	6.8	6.8	61.708	0	2.8708	36225000	8	NaN	20.4486	20.2241	20.4797	20.4047	20.4648	NaN	18.8957	20.2638	20.4055	20.2933	20.3385	20.4616	20.4704	NaN	20.7231	20.7806	20.4715	20.4403	20.2364
Q9D2V7	Coronin-7	Coro7	0.120312	0.445475	0.35853		0.507359		21.6963	22.1076	21.6765	21.4078	21.5667	21.5464	21.4957	21.6656	21.4717	21.6738	4	4	4	4.7	4.7	4.7	100.81	0	6.8038	101140000	27	22.0209	21.5236	21.5444	22.0138	22.2326	22.0762	21.5901	21.7887	21.6508	20.7719	21.619	21.8324	21.9341	21.7209	21.0449	21.7299	21.6342	21.2752	21.7142	21.5769
P56394	Cytochrome c oxidase copper chaperone	Cox17	-0.596447	1.02948	0.0934381		0.0661591		24.3993	24.3321	24.8384	23.7921	24.616	25.9538	24.794	24.7778	25.0248	24.4097	2	2	2	46	46	46	6.784	0	56.457	822250000	27	NaN	23.8403	24.9583	24.6322	24.0321	NaN	24.4458	25.4199	24.6494	23.1271	NaN	24.4571	24.8645	24.8053	24.1781	26.6125	25.7798	25.4693	24.995	24.5505
P19783;M0QWX7	Cytochrome c oxidase subunit 4 isoform 1, mitochondrial	Cox4i1	0.333927	0.565956	0.271672		0.262241		20.2928	21.1396	21.2493	21.2061	21.151	19.8286	20.6861	21.0034	20.9661	20.8851	2	2	2	20.1	20.1	20.1	19.53	0.007767	1.5693	53569000	5	19.2486	NaN	21.337	21.5498	21.3383	20.5309	21.3938	21.2037	21.1504	NaN	21.053	21.3591	21.1141	21.1634	21.1756	19.8008	20.3274	19.3574	20.6737	20.5681
Q64445	Cytochrome c oxidase subunit 8A, mitochondrial	Cox8a	-0.27144	0.104658	0.785854		0.76781		22.6896	23.915	22.8134	20.0131	21.114	NaN	23.0905	21.897	22.154	NaN	2	2	2	53.6	53.6	53.6	7.6481	0	147.81	121460000	5	22.7319	NaN	22.6473	23.547	NaN	24.2831	20.9423	24.6845	NaN	19.4303	18.7541	21.8549	20.5575	21.6706	NaN	NaN	NaN	NaN	NaN	23.0905
B7ZCP4;Q8C166;V9GX86;B7ZCP8;V9GWY2;B7ZCP7;V9GXM6;F6R587;B7ZCP6;B7ZCP5;E9Q806;A3KGK7	Copine-1	Cpne1	0.00460129	0.0118701	0.973038		0.983979		20.2354	20.1322	20.1768	20.1569	19.8011	20.0297	19.9533	20.5048	20.0919	19.8997	2	2	2	5.8	5.8	5.8	52.853	0	2.8173	29189000	5	20.3794	20.2071	20.1197	19.9931	20.1055	20.298	20.3608	19.9927	NaN	19.8206	20.4933	NaN	19.7604	19.8419	NaN	20.0175	20.074	19.9976	19.0848	20.7565
P36552	Oxygen-dependent coproporphyrinogen-III oxidase, mitochondrial	Cpox	0.339955	0.845662	0.142672		0.151703		20.2829	20.3022	20.0173	20.3186	19.8629	19.4221	20.523	19.6314	19.6877	19.8199	3	3	3	8.4	8.4	8.4	49.714	0	3.64	29670000	6	20.3631	20.3336	20.152	NaN	20.1586	20.4459	20.0712	19.8398	20.1411	20.1882	20.5357	20.2318	19.7335	19.9922	NaN	19.8374	19.0218	19.4073	NaN	21.1962
A0A2R8VK76;Q9EPU4	Cleavage and polyadenylation specificity factor subunit 1	Cpsf1	-0.0452953	0.113989	0.76915		0.842888		19.3619	18.8408	19.3621	18.9588	19.1811	19.3898	19.4425	19.0285	19.1849	18.8855	2	2	2	1.4	1.4	1.4	161.77	0.005298	1.6729	14053000	7	NaN	19.5569	19.1669	18.8916	18.5857	19.045	19.4031	19.4161	19.2671	18.8874	18.7567	19.2324	18.9511	NaN	19.4111	19.6024	19.1772	NaN	NaN	19.475
Q9QXK7	Cleavage and polyadenylation specificity factor subunit 3	Cpsf3	0.205982	1.20511	0.0623572		0.168359		21.2593	21.4551	21.615	21.0893	21.3505	21.2514	21.1219	21.1227	21.1935	21.0498	4	4	4	6.1	6.1	6.1	77.504	0	3.4795	73852000	19	21.3816	21.2293	21.1669	21.4683	21.4787	21.4184	21.2547	21.3951	22.1952	20.8613	21.2056	21.201	21.3336	21.4075	21.3104	21.2417	21.4412	21.0714	21.0147	21.1774
P47941	Crk-like protein	Crkl	0.57809	0.787331	0.163181		0.113645		18.5357	19.5075	18.9381	NaN	19.5541	18.8295	18.9285	NaN	18.7086	17.7564	2	2	2	7.6	7.6	7.6	33.83	0.0020979	1.8735	6563800	6	NaN	NaN	18.5357	19.7361	19.3201	19.4664	NaN	19.1194	18.7568	NaN	NaN	NaN	NaN	19.5541	NaN	18.5174	19.1416	NaN	NaN	19.3262
Q9ERK4;E9Q1T9;F6ZEW4;E9QAX7	Exportin-2	Cse1l	-0.00509567	0.00198475	0.99544		0.995523		29.7261	26.0439	28.7937	29.1879	30.347	30.3354	29.3433	28.1572	28.2483	28.0398	12	12	12	15.9	15.9	15.9	110.45	0	28.492	43188000000	50	32.8549	27.3516	28.9717	27.2494	20.9345	29.9477	31.9887	28.3365	26.0559	29.7385	28.5875	29.2379	27.6802	32.804	30.5568	29.779	31.9556	29.2716	25.5827	31.111
P41241	Tyrosine-protein kinase CSK	Csk	0.0719486	0.410366	0.388718		0.63131		22.0422	22.2261	21.9324	22.2477	22.0584	22.137	22.142	22.0319	21.9664	21.8697	6	6	6	15.8	15.8	15.8	50.716	0	6.4857	134120000	23	22.2022	21.8008	22.1235	22.0891	22.4403	22.149	21.7449	22.0082	22.044	22.1736	22.3178	22.2517	21.8467	22.3231	22.0053	21.7046	22.3437	22.3627	22.1312	22.141
Q60737;A2ANR6	Casein kinase II subunit alpha	Csnk2a1	0.178827	0.366229	0.4303		0.479054		22.0972	22.7017	21.5817	21.6582	22.2695	21.9235	22.1104	21.8031	21.8223	21.7549	4	4	4	14.1	14.1	14.1	45.133	0	13.08	122130000	34	22.0148	22.3093	21.9676	22.0579	23.94	22.1072	NaN	NaN	21.5817	21.5643	21.6471	21.7632	22.94	21.7512	22.1175	22.2399	21.691	21.8397	22.1196	21.9297
G3UWU5;G3UZA4;G3UZJ5;G3UZX4;P67871	Casein kinase II subunit beta	Csnk2b	-0.0380638	0.225483	0.595		0.795418		21.9791	21.9404	21.8353	21.778	21.9117	22.1223	21.9506	21.9149	21.886	21.7611	1	1	1	24.1	24.1	24.1	6.8465	0	5.9414	117610000	8	21.647	22.3062	21.9843	21.6523	22.2406	21.9284	21.5413	22.0305	21.9339	21.7889	21.6683	21.8768	21.8925	22.1353	21.7074	22.175	22.2181	21.9738	21.9758	21.9889
Q99LC2	Cleavage stimulation factor subunit 1	Cstf1	0.00421257	0.00566639	0.987037		0.987889		19.8564	19.1573	20.0391	19.4356	19.5578	20.2827	19.7167	19.3351	19.5698	19.1208	2	2	2	5.1	5.1	5.1	48.381	0.0021112	1.8976	26104000	6	20.3703	19.6979	19.501	17.8634	19.6569	19.9516	20.1328	19.8562	20.1284	19.4254	19.5731	19.3082	19.538	19.6519	19.4836	20.4365	19.962	20.4497	19.781	19.8638
A2AEK1;Q8BIQ5-2;Q8BIQ5;A2AEJ8;Q8C7E9	Cleavage stimulation factor subunit 2;Cleavage stimulation factor subunit 2 tau variant	Cstf2;Cstf2t	0.175451	0.707489	0.196115		0.315933		23.7676	23.678	23.575	23.7903	24.0896	23.7974	23.5457	23.2944	23.7581	23.6275	6	6	6	15.9	15.9	15.9	58.571	0	7.2684	398990000	15	23.6925	23.627	23.9831	23.7128	23.5341	23.7871	23.6625	23.489	23.5733	23.9355	23.5393	23.8961	24.3778	23.8925	23.9983	23.9232	23.8232	23.6458	23.4368	23.4913
Q99LI7	Cleavage stimulation factor subunit 3	Cstf3	0.13614	0.48281	0.328996		0.457982		21.1905	20.6768	20.6567	20.4492	20.771	20.5061	20.6623	20.4924	20.7042	20.6985	3	3	3	5.7	5.7	5.7	82.876	0	3.095	51397000	5	20.8408	21.7173	21.0135	20.7821	20.3461	20.9021	20.6401	20.6586	20.6713	20.0931	20.52	20.7344	20.7092	20.8396	20.7643	20.5892	20.2725	20.6566	20.4531	20.8748
P70698	CTP synthase 1	Ctps1	-0.0719162	0.196596	0.635922		0.732191		21.1868	20.7336	21.1139	20.8963	20.9958	20.6403	21.2991	21.1381	21.2708	20.9378	3	3	2	6.4	6.4	4.1	66.682	0	3.5563	61630000	32	21.0599	21.1046	21.396	20.6486	20.6215	20.9308	20.9763	21.2515	NaN	21.0574	21.1567	20.4749	21.1284	20.8631	NaN	20.8932	20.4067	20.621	21.1522	21.378
F6WR04;O70370	Cathepsin S	Ctss	0.244389	0.398874	0.39914		0.410395		21.1737	19.841	20.8619	20.8539	21.1025	20.7486	20.0163	20.7144	20.5107	20.6211	2	2	2	7.9	7.9	7.9	38.63	0.00074349	2.1658	42717000	11	20.8792	21.6587	20.9831	20.9951	18.6869	NaN	20.9409	NaN	20.7828	21.2398	21.0089	20.3131	21.1179	21.4779	20.7119	NaN	20.8553	20.6418	18.4067	21.1321
Q9WUU7	Cathepsin Z	Ctsz	-0.0678886	0.140801	0.723101		0.782175		21.2495	21.5201	21.5231	20.8975	21.5391	21.6039	20.8694	21.5257	21.5217	21.5481	3	3	3	10.8	10.8	10.8	33.996	0	2.8882	79098000	5	21.2432	21.1841	21.3212	21.2165	21.6955	21.6481	21.5212	21.5733	21.4749	21.4022	19.6598	21.6303	21.4587	21.6149	21.5437	21.4624	21.581	21.7682	21.4055	21.32
Q9D4H8-2;Q9D4H8;A0A3Q4EI83;H7BX52;A0A3Q4EBZ1;E0CYT5	Cullin-2	Cul2	-0.00402006	0.00895467	0.979592		0.985177		19.1074	18.9728	NaN	NaN	19.1562	18.9629	NaN	NaN	19.3564	18.9291	2	2	2	2.5	2.5	2.5	82.27	0.0065488	1.6333	5964000	2	19.1074	NaN	NaN	NaN	18.8486	19.0969	NaN	NaN	NaN	NaN	NaN	NaN	NaN	19.3108	19.0016	19.5357	19.8821	17.4709	NaN	NaN
P56395;G5E850;E0CY88	Cytochrome b5	Cyb5a	-0.050312	0.0494297	0.892422		0.908646		23.2331	22.4435	22.7029	23.6192	21.9591	22.197	23.3991	22.8394	22.5996	23.1744	3	3	3	42.5	42.5	42.5	15.241	0	34.923	249980000	16	23.2233	23.3488	23.1273	22.8526	21.869	22.6089	21.5272	24.2314	22.3501	23.6558	23.5638	23.638	21.2031	22.7152	NaN	21.9217	23.3098	21.3594	23.1604	23.1629
Q5SQX6;F6QD74;A0A0U1RQ05;A0A0R4J119;Q7TMB8-2;Q7TMB8	Cytoplasmic FMR1-interacting protein 2;Cytoplasmic FMR1-interacting protein 1	Cyfip2;Cyfip1	0.300271	0.875084	0.133326		0.161216		21.1356	20.8465	20.6517	21.3914	21.0672	20.5937	21.1875	20.5728	20.4605	20.7765	4	4	4	3.4	3.4	3.4	145.66	0	4.2339	58622000	14	21.4086	21.0459	20.9523	20.9177	20.6402	20.9816	NaN	20.9604	20.3429	21.5931	21.5996	20.9814	21.569	20.9101	20.7227	21.2231	19.3429	21.2153	21.2549	21.1238
Q3UGB5;Q9JII5-2;Q9JII5;D3Z4J1	DAZ-associated protein 1	Dazap1	0.244064	0.818229	0.151975		0.214448		23.0757	22.9672	22.9294	23.3444	23.4536	22.6064	22.7547	22.8541	23.1139	23.2209	6	6	6	32.8	32.8	32.8	43.157	0	33.756	273070000	28	23.3663	22.9585	22.9023	23.1618	22.5301	23.2096	22.8604	22.5487	23.3791	23.3324	23.5651	23.1359	23.4136	23.7985	23.1487	22.7712	22.1918	22.8562	21.4492	23.2673
Q4VWZ5;P31786;D3Z563;M0QWU8	Acyl-CoA-binding protein	Dbi	0.0186527	0.0479431	0.895482		0.936049		23.5529	23.2019	23.2076	23.6441	23.6057	23.1532	23.716	23.4807	23.2822	23.4869	2	2	2	25.2	25.2	25.2	15.228	0	10.867	293660000	16	23.4219	23.6689	23.568	23.463	24.1323	22.0103	23.076	23.2516	23.2952	23.1489	NaN	24.1393	23.541	23.5612	23.7149	23.3461	23.5871	22.5264	23.751	NaN
P61963	DDB1- and CUL4-associated factor 7	Dcaf7	0.04175	0.228363	0.591067		0.782269		19.6398	19.665	19.7111	19.5904	19.7801	19.5824	19.8954	19.5837	19.506	19.6102	2	2	2	6.4	6.4	6.4	38.926	0.0077771	1.5771	19816000	2	19.8255	19.4225	19.6714	NaN	19.665	NaN	19.4457	20.1371	19.5506	19.6336	19.2988	19.8388	19.8083	19.7197	19.8124	19.5534	NaN	19.6114	19.8954	NaN
A0A0A6YWY2;Q8N7N5	DDB1- and CUL4-associated factor 8	Dcaf8	0.326425	1.19266	0.064171		0.0943661		19.3595	NaN	19.3112	18.9983	19.315	18.9379	19.068	19.2129	18.5371	18.8419	1	1	1	10.5	10.5	10.5	17.537	0.007732	1.5544	11898000	2	19.1217	19.3615	19.5952	NaN	NaN	NaN	NaN	19.3112	NaN	19.0586	18.938	NaN	19.4374	19.2553	19.2522	18.6498	18.8938	19.2701	19.0794	19.0565
Q9DAR7;Q3TBW9	m7GpppX diphosphatase	Dcps	0.240509	0.476319	0.33395		0.359442		21.5486	22.3756	22.7499	22.4331	22.4186	22.4593	22.0999	21.8697	21.7636	22.1307	6	6	6	27.5	27.5	27.5	38.988	0	7.7516	157830000	28	21.4976	22.1811	20.9671	23.6114	21.5286	21.9867	23.1896	22.5569	22.5033	22.6902	22.2467	22.3622	22.2438	21.6725	23.3395	22.5951	22.0486	22.734	22.3241	22.2127
D3YX34;E9Q586		Dctn1	-0.195459	0.0963503	0.801032		0.791288		20.8453	23.3974	23.2852	21.0989	23.6749	22.0646	21.3015	23.338	22.8911	23.6838	1	1	1	3.6	3.6	3.6	126.82	0	10.314	243790000	8	21.3672	19.4153	21.7534	23.6649	23.1033	23.4241	23.4871	NaN	23.0832	NaN	21.0989	NaN	23.2571	24.2828	23.4848	22.162	21.0329	22.9988	22.0112	20.9868
Q99KJ8	Dynactin subunit 2	Dctn2	0.0788994	0.106558	0.782424		0.814794		21.6037	20.926	21.7028	22.1953	21.9182	21.2985	22.1042	21.1853	21.9048	21.4586	6	6	6	22.4	22.4	22.4	44.116	0	7.1933	105330000	20	21.9688	20.4293	22.4131	21.0697	21.9716	19.7366	21.8589	21.4652	21.7843	22.422	22.2085	21.9554	21.9772	22.0389	21.7385	20.799	21.3518	21.7449	21.9717	22.3021
Q3U1J4	DNA damage-binding protein 1	Ddb1	0.216669	0.784291	0.164327		0.247159		24.1003	24.0502	24.219	24.3027	24.2244	24.2411	24.2287	23.8035	24.0056	23.5344	17	17	17	18.3	18.3	18.3	126.85	0	21.839	566450000	101	24.1024	23.7945	24.4041	23.6518	23.96	24.5387	24.3207	24.4854	23.851	24.1342	24.3189	24.4549	24.3711	24.2576	24.0444	24.2964	24.1268	24.3001	24.1065	24.3586
Q91VR5	ATP-dependent RNA helicase DDX1	Ddx1	-0.118307	0.8088	0.15531		0.394663		22.7567	22.8745	23.1311	22.9801	22.834	22.9326	23.1288	22.9528	23.0799	23.0737	8	8	8	16.1	16.1	16.1	82.499	0	9.1188	262790000	42	22.4824	22.2345	23.5532	22.8385	22.9814	22.8034	22.9227	23.1765	23.294	22.9628	22.8383	23.1392	23.0074	22.792	22.7026	23.2536	22.7227	22.8214	23.0203	23.2518
Q3U741;Q501J6;Q3TU25;Q501J6-2	Probable ATP-dependent RNA helicase DDX17	Ddx17	0.141359	0.763402	0.172424		0.354329		23.0905	23.2618	23.1582	23.0667	23.1331	23.0504	22.8129	22.9216	22.9002	23.3184	12	9	9	25.2	20.4	20.4	72.584	0	12.336	258470000	48	23.0041	23.101	23.1665	23.4294	23.1059	23.2499	23.2512	23.4042	22.8192	23.1038	23.1803	22.916	23.2659	23.1943	22.939	23.1381	23.1207	22.8923	23.0597	22.4506
Q9JJY4;A0A0G2JE88	Probable ATP-dependent RNA helicase DDX20	Ddx20	-0.328209	0.484946	0.327382		0.309859		20.1196	18.6544	19.7612	19.4422	19.8681	19.1973	20.2157	20.0769	19.8342	20.1624	2	2	2	4.2	4.2	4.2	91.709	0	2.356	26164000	5	19.7525	19.8607	20.7457	NaN	NaN	18.6544	NaN	NaN	19.7612	19.7843	19.5116	19.0307	19.9652	19.7372	19.9017	19.6842	18.4432	19.4646	20.1333	20.9911
H3BLJ6;Q921N6-2;Q921N6	Probable ATP-dependent RNA helicase DDX27	Ddx27	0.116401	0.224377	0.596517		0.659558		20.7107	19.7095	19.7992	19.875	20.0692	20.0596	20.1511	19.9715	19.5068	19.8925	3	3	3	11	11	11	33.952	0	2.4987	25175000	3	NaN	21.3985	20.0228	20.0689	19.3139	19.7456	19.8398	19.9861	19.5717	20.0507	NaN	19.6992	19.9513	20.187	NaN	NaN	20.1454	19.9738	20.2044	20.1212
F8WHR6;Q569Z5-2;Q569Z5	Probable ATP-dependent RNA helicase DDX46	Ddx46	0.0687328	0.53334	0.29286		0.606857		23.0941	23.1461	23.1072	23.0572	22.9088	23.1224	22.9141	23.0501	22.8731	23.0102	9	9	9	9.7	9.7	9.7	117	0	10.353	267720000	77	22.989	23.0583	23.2352	22.9931	23.2931	23.1522	23.1318	23.1238	23.0661	22.835	23.121	23.2158	22.9602	23.1335	22.6326	23.1949	23.0242	23.148	22.9999	22.9675
A0A0R4IZX1;Q8C2K1;A0A3B2W860;A0A3B2W417;Q8C2K1-2	Differentially expressed in FDCP 6	Def6	0.151432	0.46358	0.34389		0.447592		20.1241	20.0916	19.8421	20.2211	19.4526	19.9526	19.9146	19.6699	19.7629	19.6744	2	2	2	4	4	4	73.452	0	2.8123	22137000	6	20.0826	20.1655	NaN	20.2267	20.1388	19.9093	19.7396	19.9607	19.8259	20.3138	20.3826	19.9669	19.8974	18.3076	20.1528	19.998	19.9073	NaN	19.9146	NaN
O88673;R4I5B2	Diacylglycerol kinase alpha	Dgka	0.251446	0.769531	0.170008		0.223296		20.1222	20.101	19.567	20.3942	20.14	19.8943	19.6796	19.7218	NaN	19.9582	2	2	2	3.3	3.3	3.3	82.761	0.0053655	1.7051	25151000	2	20.1842	20.0907	20.0917	20.1192	20.0828	NaN	20.7731	18.3608	NaN	20.0296	20.6785	20.4747	20.4502	20.047	19.9229	20.0285	NaN	19.76	19.4748	20.0709
A0A0U1RPX3;Q504N4;Q9QX60-2;Q9QX60	Deoxyguanosine kinase, mitochondrial	Dguok	0.11909	0.0397848	0.912463		0.913219		27.1191	23.5256	27.3024	26.6426	27.7864	23.4957	27.0249	27.3329	27.2529	26.6742	1	1	1	8.3	8.3	8.3	23.477	0.0083014	1.5282	4123400000	23	27.0866	26.5068	27.7639	27.8929	26.4915	16.1925	26.577	27.7306	27.5995	26.1817	27.5722	26.1738	NaN	28.0169	27.5559	15.2018	27.5328	27.7524	27.3054	26.5449
P00375	Dihydrofolate reductase	Dhfr	0.0757244	0.190135	0.645453		0.732246		22.2023	21.902	22.0273	22.3704	21.9305	22.0484	22.2095	22.0818	22.2126	21.5015	6	6	6	51.3	51.3	51.3	21.606	0	11.7	138940000	17	22.0401	21.925	22.6419	21.9756	22.076	21.6543	22.0532	21.9155	22.1131	22.5698	22.5317	22.0095	21.5362	22.0645	22.1908	21.6404	22.6161	21.8886	21.6504	22.2492
A0A087WPL5;E9QNN1;O70133;O70133-2;O70133-3;Q3UR42	ATP-dependent RNA helicase A	Dhx9	0.0795475	1.06478	0.0861433		0.479518		25.821	25.9177	25.9776	25.8699	25.7651	25.853	25.7615	25.7638	25.7747	25.8007	22	22	22	24.3	24.3	24.3	149.62	0	188.16	2100800000	176	25.9451	25.7472	25.7708	25.6431	25.9419	26.1679	26.0171	25.9115	26.0043	25.7931	25.9771	25.8396	25.8547	25.6838	25.7568	25.8657	25.7995	25.8938	25.8304	25.6778
Q9ESX5;B7ZCL7;A2AN81;F6YUI5	H/ACA ribonucleoprotein complex subunit 4	Dkc1	0.123465	0.261185	0.548044		0.616636		22.1115	22.5996	21.7974	22.1743	22.5914	22.5998	22.1527	21.9002	22.0055	21.9988	5	5	5	12.6	12.6	12.6	57.401	0	6.2041	149530000	33	22.8415	21.8336	21.6595	22.7274	22.6927	22.3788	21.8243	21.9715	21.5965	22.419	22.0621	22.0418	22.3687	22.6175	22.7882	22.7754	22.3526	22.6714	22.3126	21.7354
Q8BMF4	Dihydrolipoyllysine-residue acetyltransferase component of pyruvate dehydrogenase complex, mitochondrial	Dlat	-0.286961	0.329021	0.468791		0.449791		19.301	20.9814	21.0103	20.7049	21.3092	20.5376	21.0646	21.0014	21.3312	20.8068	3	3	3	6.5	6.5	6.5	67.941	0	5.6483	54344000	6	NaN	NaN	19.301	20.9825	21.1017	20.86	20.8566	21.164	NaN	21.0824	20.7795	20.2528	21.3911	21.5716	20.9649	20.4356	20.2256	20.9516	21.071	21.0233
O08749	Dihydrolipoyl dehydrogenase, mitochondrial	Dld	0.486395	0.759281	0.174068		0.13667		21.8973	21.0277	22.5138	22.1733	22.4231	21.3351	20.8707	21.8228	21.8455	21.729	4	4	4	10.4	10.4	10.4	54.272	0	4.599	121780000	13	22.0949	22.0971	21.4998	20.5176	20.384	22.1814	23.6964	21.8942	21.9507	21.5408	22.1523	22.8268	22.1995	22.9447	22.1251	20.7381	21.4882	21.779	20.2462	21.6688
E9Q0T8		Dnah7a	0.872141	0.475777	0.334366		0.23518		22.7918	22.0314	22.0473	22.1894	22.6102	21.3844	22.6677	18.2862	22.8698	22.1013	1	1	1	0.4	0.4	0.4	460.9	0.0021277	1.9132	124530000	8	22.8648	23.1668	22.3437	22.0314	NaN	NaN	22.2786	21.8159	NaN	22.1607	22.2196	22.1878	22.3875	22.8329	NaN	22.159	20.0517	21.9425	21.9482	23.0336
P63037;B1AXY1	DnaJ homolog subfamily A member 1	Dnaja1	-0.200943	0.311982	0.487548		0.509952		24.2134	22.7083	23.7827	23.8901	24.0135	23.934	24.2085	23.9407	23.8236	23.7059	8	8	8	28	28	28	44.868	0	10.756	479670000	31	24.1017	24.2917	24.2469	22.838	20.9832	24.3035	23.8951	23.59	23.863	23.9481	23.9443	23.7779	24.5603	23.6503	23.83	23.7445	23.9739	24.0836	24.1776	24.2048
Q9QYJ0	DnaJ homolog subfamily A member 2	Dnaja2	-0.00413589	0.021198	0.952362		0.979231		24.2773	24.0409	23.9279	24.0079	24.1109	24.128	24.1223	23.9872	24.0116	24.1364	9	9	9	30.8	30.8	30.8	45.745	0	25.06	544270000	79	24.1839	24.2325	24.4156	24.0585	23.9626	24.1014	23.9492	23.8696	23.9649	23.9032	24.0513	24.0691	24.1027	24.0888	24.1411	24.2383	24.1624	23.9833	24.0418	24.1929
Q99KV1	DnaJ homolog subfamily B member 11	Dnajb11	0.198327	0.975903	0.105705		0.219179		22.2727	22.2309	21.8337	22.0036	22.1183	21.7814	22.0355	22.0845	21.6939	21.8724	2	2	2	8.9	8.9	8.9	40.555	0	22.931	133680000	13	22.0788	22.3462	22.393	22.2857	22.1751	22.232	21.7029	21.938	21.8603	22.1029	22.0139	21.8941	22.0372	22.2073	22.1104	22.1403	21.4127	21.7913	21.8863	21.9223
Q91YW3	DnaJ homolog subfamily C member 3	Dnajc3	0.328029	0.316322	0.4827		0.450196		20.2623	19.5341	20.3336	19.1494	20.0342	19.7638	18.3065	20.4036	20.1565	19.0429	3	3	3	10.1	10.1	10.1	57.463	0	2.7258	22640000	4	NaN	20.2067	20.3178	19.5341	NaN	NaN	19.9515	21.0268	20.0224	17.9119	19.2082	20.3281	NaN	20.0764	19.992	19.5165	20.5071	19.2679	NaN	18.3065
Q9QYI3;F7BTP8	DnaJ homolog subfamily C member 7	Dnajc7	-0.18191	0.399964	0.39814		0.45168		20.9814	21.033	NaN	20.5369	20.2418	20.8108	20.735	20.6493	20.9786	21.2271	3	3	3	6.3	6.3	6.3	56.475	0	4.0433	45783000	25	20.9722	20.9778	20.994	20.8224	21.2435	NaN	NaN	NaN	NaN	20.5476	20.6132	20.45	20.3269	20.3636	20.035	20.2142	21.4245	20.7938	21.0208	20.8678
Q91WN1	DnaJ homolog subfamily C member 9	Dnajc9	0.320621	0.313131	0.486261		0.453956		21.4767	21.0923	NaN	21.0248	21.0469	21.3589	19.3624	21.0475	21.0587	21.3702	2	2	2	8.9	8.9	8.9	30.059	0	2.8328	55007000	15	21.3411	21.6287	21.4603	21.1236	NaN	21.0609	NaN	NaN	NaN	20.7416	21.2622	21.0705	21.1845	20.632	21.3241	21.3414	21.3764	NaN	21.4356	17.2892
A0A2U3TZ67;E9PUD2;Q8K1M6-4;Q8K1M6-3;Q8K1M6-2;Q8K1M6	Dynamin-1-like protein	Dnm1l	-0.129633	1.08199	0.0827958		0.3145		21.3401	21.508	21.2381	21.2006	21.3771	21.5392	21.4028	21.4695	21.3592	21.5415	3	3	3	5.3	5.3	5.3	65.395	0	2.8282	80635000	4	21.2604	21.4408	21.3192	21.4393	21.6542	21.4304	21.1671	21.2653	21.2821	21.1309	21.0291	21.4419	21.4061	21.2453	21.48	21.5574	21.5863	21.4739	21.4181	21.3682
Q8C3J5;Q5SRI3;D6RGU3	Dedicator of cytokinesis protein 2	Dock2	0.266005	0.729863	0.186267		0.226042		23.3702	23.5129	23.5593	23.3729	23.3068	23.4756	23.3582	22.4698	23.2109	23.2775	16	16	16	10.6	10.6	10.6	211.7	0	15.62	320530000	59	23.1936	23.5431	23.3738	23.4335	23.937	23.1681	23.6391	23.4212	23.6175	23.5658	23.8139	22.7389	23.8762	23.1403	22.9037	23.2301	23.6504	23.5463	23.2196	23.6579
Q99KK7	Dipeptidyl peptidase 3	Dpp3	0.032967	0.201496	0.628787		0.824371		22.5676	22.4581	22.4596	22.4738	22.5198	22.2573	22.4562	22.4863	22.4663	22.6479	7	7	7	17.6	17.6	17.6	82.897	0	20.822	185770000	28	22.5771	22.8136	22.312	22.4169	22.5627	22.3946	22.2623	22.5356	22.581	22.6146	22.4523	22.3544	22.1993	22.5005	22.8596	22.6052	22.1191	22.0476	22.3664	22.5846
Q99LT0	Protein dpy-30 homolog	Dpy30	0.274782	1.15317	0.0702796		0.121643		22.3892	22.6141	22.2767	22.2347	22.4241	22.3526	22.2807	21.9336	21.8851	NaN	2	2	2	29.3	29.3	29.3	11.213	0	2.6386	142800000	10	22.3377	22.387	22.4429	22.6141	NaN	NaN	22.2749	22.3152	22.24	22.0626	22.1483	22.4933	22.4718	22.2362	22.5645	22.5384	22.1366	22.3828	22.2314	22.2122
O08553	Dihydropyrimidinase-related protein 2	Dpysl2	0.0856709	0.692325	0.203083		0.513945		24.9478	25.0746	24.878	24.8906	24.901	24.908	24.8645	24.8555	24.6682	24.9675	14	14	12	41.3	41.3	36.2	62.277	0	163.07	952460000	117	24.9383	24.9097	24.9955	25.2293	24.7861	25.2085	24.7509	24.9397	24.9433	24.8277	24.7947	25.0494	24.8344	24.8783	24.9904	24.7206	25.0372	24.9661	24.9346	24.928
D3YYC2;F6T9K1;G3UXH5;D3YY09;Q9D6N5	Dr1-associated corepressor	Drap1	-0.284536	0.662706	0.217417		0.24025		19.8517	18.97	19.4981	20.0027	19.593	NaN	19.751	19.7804	19.8914	20.0478	2	2	2	13.6	13.6	13.6	17.587	0	2.9407	20199000	3	19.8994	19.755	19.9008	18.1316	NaN	19.8084	19.0208	19.9357	19.5378	19.8915	20.6982	19.4182	20.0849	NaN	19.1012	NaN	NaN	NaN	NaN	19.751
Q9R0P5	Destrin	Dstn	0.0806355	0.37942	0.417427		0.617214		20.5654	21.0257	20.7542	20.5336	20.7949	20.7282	20.6719	20.6239	20.6991	20.5475	3	3	3	18.8	18.8	18.8	18.521	0	4.1464	43214000	28	20.6233	20.777	20.296	NaN	20.7656	21.2858	20.7607	20.7424	20.7594	20.3606	20.6833	20.5568	20.6591	20.7649	20.9608	20.6553	20.6825	20.8468	21.0044	20.3499
Q8R1Q8	Cytoplasmic dynein 1 light intermediate chain 1	Dync1li1	-0.152348	0.179984	0.660718		0.678309		20.336	20.45	19.4391	20.4045	20.5521	20.6374	19.868	NaN	NaN	20.6607	2	2	2	4.2	4.2	4.2	56.614	0.00072886	2.0659	28842000	7	NaN	20.336	NaN	20.6442	20.3799	20.3259	20.2903	NaN	18.5879	20.242	20.5415	20.4299	20.5415	20.6483	20.4665	20.6461	20.4739	20.7923	20.7029	18.4745
P63168;Q80ZS7;Q9D0M5	Dynein light chain 1, cytoplasmic;Dynein light chain 2, cytoplasmic	Dynll1;BC048507;Dynll2	0.595092	0.679208	0.209311		0.148336		23.6539	24.1824	23.9201	23.4994	23.2247	23.013	21.6829	24.0817	23.1071	23.6203	4	4	4	59.6	59.6	59.6	10.366	0	8.1062	383090000	16	23.7141	24.1315	23.116	23.7904	24.3477	24.4092	23.9601	24.068	23.7322	24.1729	25.0295	21.2957	23.7537	21.6805	24.24	22.7416	21.8984	24.3988	24.1319	18.6543
D6RE33;A0A0R4J1Q0;G5E896;Q3UJB9-2;Q3UJB9	Enhancer of mRNA-decapping protein 4	Edc4	0.189236	0.783184	0.164746		0.275996		21.1267	21.6543	21.5336	21.5244	21.5478	21.468	21.0141	21.385	21.3982	21.1752	5	5	5	4.1	4.1	4.1	141.95	0	4.4433	82049000	14	21.1839	20.3874	21.8087	21.6429	21.7343	21.5855	21.5912	21.6177	21.3919	21.4874	21.6183	21.4674	21.5627	21.5468	21.5338	21.3859	21.5743	21.4437	20.5334	21.2281
Q80T06;A0A0R4J1E2;P57776;P57776-3;A0A0R4J1L2;Q91VK2;F6ZFU0;P57776-2;E9QN08;D3YY68;D3YUQ9	Elongation factor 1-delta	Eef1d	-0.149823	0.542251	0.286912		0.414798		24.8655	25.2016	25.0406	25.1468	24.7206	25.45	25.2281	24.9519	24.9274	25.1667	9	9	7	39.9	39.9	35.6	31.292	0	323.31	1081200000	92	24.8706	25.0106	24.7154	25.1967	25.2285	25.1794	25.3366	24.8878	24.8973	25.0078	24.8737	25.5591	24.8939	24.9152	24.3527	25.5957	25.3746	25.3798	25.3648	25.2842
Q9D1M4	Eukaryotic translation elongation factor 1 epsilon-1	Eef1e1	-0.0906891	0.217428	0.606139		0.687541		21.5158	21.3376	21.4816	21.8177	21.8676	21.6458	21.8318	21.2183	22.0281	21.7497	4	4	4	37.4	37.4	37.4	19.859	0	14.087	98611000	33	21.2279	NaN	21.8037	21.7562	21.2098	21.0467	22.438	21.005	21.0018	22.0985	NaN	21.5369	21.7364	21.8077	22.0586	21.5669	21.8332	21.5373	21.4672	21.9179
Q3TGW2	Endonuclease/exonuclease/phosphatase family domain-containing protein 1	Eepd1	0.160485	0.889375	0.12901		0.289731		20.0516	20.5015	20.4188	20.2557	NaN	20.1632	20.2301	20.0651	20.0978	20.1759	1	1	1	2.3	2.3	2.3	62.953	0.0014378	1.9885	17451000	5	NaN	20.0773	20.0258	20.5261	NaN	20.4768	20.4188	NaN	NaN	NaN	20.2425	20.269	NaN	NaN	NaN	20.1632	NaN	NaN	20.1994	20.2607
Q9WVK4	EH domain-containing protein 1	Ehd1	-0.38273	0.369468	0.427103		0.38483		20.1418	19.9242	18.4122	19.9172	19.3064	21.0454	19.9423	19.3914	20.1074	19.1289	3	3	2	6.4	6.4	4.3	60.602	0	2.7099	17034000	3	20.2156	NaN	20.068	19.8615	20.0129	19.8983	NaN	NaN	18.4122	NaN	19.7156	20.1187	NaN	18.687	19.9258	NaN	NaN	21.0454	19.8573	NaN
Q9QXY6;Q9EQP2	EH domain-containing protein 3;EH domain-containing protein 4	Ehd3;Ehd4	0.248821	1.06904	0.0853021		0.151902		19.2596	19.4091	19.1313	18.8524	19.2361	18.7323	18.7114	19.0019	19.1124	19.0865	2	1	1	4.1	2.1	2.1	60.82	0.008312	1.5337	15297000	4	19.2554	19.1272	19.3963	19.2743	19.3044	19.6487	18.973	19.3582	19.0628	18.9351	18.9972	18.625	19.2827	19.2028	19.2229	NaN	18.9826	18.4819	19.0654	NaN
P48024;J3QN87;A0A1L1SSA3;J3QPZ8;Q9CXU9	Eukaryotic translation initiation factor 1;Eukaryotic translation initiation factor 1b	Eif1;Eif1b	1.0223	0.596345	0.253312		0.151854		19.999	21.0331	NaN	20.0515	20.2036	20.9206	20.2254	18.0039	17.2864	20.0613	4	4	4	39.8	39.8	39.8	12.746	0	12.056	28141000	17	20.2137	19.7539	20.0294	21.0331	NaN	NaN	NaN	NaN	NaN	20.1474	19.9559	20.0513	20.3721	20.0351	NaN	20.249	22.9949	19.5178	20.4664	NaN
Q8BMJ3;Q60872;Q8BX20;Q3UTA4;Q3UT53;Q3TQZ4;J3QQ02;J3QPI8;J3QP87;J3QNT6;J3QMW5;A0A1Y7VNG9;A0A1Y7VLT7;A0A1Y7VK80;A0A1Y7VJE9	Eukaryotic translation initiation factor 1A, X-chromosomal;Eukaryotic translation initiation factor 1A	Eif1ax;Eif1a;Gm5662;Gm8300;Gm4027;Gm2016;Gm2056;Gm6803;Gm2035;Gm5039;Gm2075	-0.583339	0.876913	0.132766		0.0937845		20.4213	21.5967	20.9688	21.0809	19.728	20.8726	21.2454	21.7337	21.3808	21.4799	2	2	2	14.6	14.6	14.6	16.46	0.00073746	2.1341	68086000	3	21.3551	18.433	21.4756	21.602	NaN	21.5914	21.1369	20.8007	NaN	21.5864	20.8984	20.758	20.2942	NaN	19.1618	20.7064	22.5124	19.399	21.5213	21.5894
Q8CHW4	Translation initiation factor eIF-2B subunit epsilon	Eif2b5	-0.520836	1.20402	0.0625149		0.0528		19.8218	NaN	20.0091	19.8516	NaN	21.0142	20.0062	20.2202	20.4395	20.3949	1	1	1	1.8	1.8	1.8	80.085	0	2.3166	14764000	4	NaN	19.8218	NaN	NaN	NaN	NaN	20.3174	19.5857	20.1243	NaN	19.8516	NaN	NaN	NaN	NaN	NaN	21.0142	NaN	NaN	20.0062
P23116	Eukaryotic translation initiation factor 3 subunit A	Eif3a	-0.127504	0.546063	0.284405		0.447423		24.3299	24.2718	24.5127	24.1382	24.1781	24.6182	24.5413	24.5036	24.2514	24.1539	16	16	16	15.6	15.6	15.6	161.93	0	157.69	660610000	70	24.2407	24.3791	24.3699	24.3152	24.1538	24.3464	24.3284	24.3718	24.838	24.164	24.3348	23.9158	24.1999	24.246	24.0885	24.5403	24.6204	24.6939	24.5841	24.444
Q8R1B4	Eukaryotic translation initiation factor 3 subunit C	Eif3c	-0.165659	0.727005	0.187497		0.323837		23.8583	23.9737	23.6639	23.7279	24.0288	24.2328	24.2265	23.9674	23.8614	23.7928	12	12	12	16.2	16.2	16.2	105.53	0	16.585	497460000	83	23.888	23.6977	23.9891	23.7512	24.1196	24.0502	23.7528	23.8943	23.3448	23.7828	23.7638	23.6372	24.0144	24.1358	23.9362	24.3572	24.1057	24.2354	24.0585	24.3724
P60229	Eukaryotic translation initiation factor 3 subunit E	Eif3e	-0.0836815	0.157974	0.695066		0.750763		23.3964	23.1938	23.7419	23.6038	23.2869	23.5488	22.8867	23.6676	23.9887	23.5496	11	11	11	29.9	29.9	29.9	52.22	0	14.413	359500000	32	22.8653	23.733	23.591	23.4691	22.5553	23.557	23.9468	23.5371	NaN	23.2055	23.7131	23.8929	23.453	23.3843	23.0235	23.7924	23.9722	22.8818	23.9803	21.694
Q91WK2	Eukaryotic translation initiation factor 3 subunit H	Eif3h	-0.775163	0.693913	0.202343		0.12483		21.5018	20.976	20.9591	23.4497	21.8226	23.756	22.0248	22.4375	22.0342	22.3324	7	7	7	27.6	27.6	27.6	39.832	0	8.0614	193970000	17	20.4113	20.7035	23.3906	21.8113	19.1521	21.9645	21.6064	18.5799	22.6909	22.9378	23.8411	23.5701	22.4499	20.4362	22.5817	23.976	23.2648	24.0272	20.2926	22.5357
Q9QZD9;A2AE03	Eukaryotic translation initiation factor 3 subunit I	Eif3i	-0.0448898	0.126804	0.746786		0.831769		23.1675	22.9727	22.8927	22.8716	22.9619	23.4604	22.9954	23.055	22.8374	22.7427	6	6	6	27.4	27.4	27.4	36.46	0	18.307	260120000	29	23.2763	23.1762	23.0501	22.9532	23.0401	22.9247	22.883	22.781	23.0141	22.9642	22.5884	23.0622	23.1561	22.8126	22.9171	23.3508	23.2185	23.812	22.176	23.5791
Q3UGC7;Q66JS6	Eukaryotic translation initiation factor 3 subunit J-A;Eukaryotic translation initiation factor 3 subunit J-B	Eif3j1;Eif3j2	-0.149169	0.686278	0.205931		0.361954		22.733	22.6791	22.6588	22.3091	22.7112	23.0571	22.6704	22.728	22.6387	22.7428	3	3	3	19.9	19.9	19.9	29.343	0	18.943	203460000	32	22.4729	22.7447	22.9813	22.6157	22.7646	22.657	22.5949	22.8242	22.5573	22.3556	22.3726	22.199	23.0672	22.4699	22.5965	23.0705	23.0186	23.0823	22.7086	22.7291
Q99JX4;A2A702	Eukaryotic translation initiation factor 3 subunit M	Eif3m	-0.0578419	0.167319	0.68027		0.774773		24.0213	23.6836	23.7333	23.6107	23.776	23.7933	24.0264	23.3976	23.8643	24.0325	9	9	9	32.4	32.4	32.4	42.516	0	28.559	445770000	53	24.5571	23.8152	23.6917	23.7387	23.5829	23.7292	23.6327	23.7869	23.7804	23.5545	23.5776	23.7	23.5179	24.6313	23.1789	24.0649	24.4136	22.9014	23.923	24.1048
Q8BTU6;P10630;P10630-2;A0A338P6X5;E9Q561	Eukaryotic initiation factor 4A-II;Eukaryotic initiation factor 4A-II, N-terminally processed	Eif4a2	0.442845	0.332313	0.465251		0.409931		24.7104	22.7773	22.3964	23.3815	23.3573	21.7184	24.2964	23.0835	22.8648	22.4456	9	2	2	33.7	9.7	9.7	41.29	0	323.31	342720000	24	25.0067	NaN	24.414	22.8108	22.7439	NaN	21.6794	22.6185	22.8912	23.3104	21.5787	25.2555	23.3573	NaN	NaN	22.057	20.8862	22.2121	25.0182	23.0318
Q91VC3;A0A0N4SVP8;E9PV04;A2AFK7	Eukaryotic initiation factor 4A-III;Eukaryotic initiation factor 4A-III, N-terminally processed	Eif4a3;Gm8994	-0.0224739	0.111656	0.773293		0.890744		24.4847	24.3004	24.3633	24.5267	24.4269	24.6856	24.3986	24.311	24.4167	24.4025	12	11	11	35	32.8	32.8	46.839	0	88.283	695840000	109	24.5205	24.7545	24.179	24.5002	24.4654	23.9356	24.2837	24.3255	24.4807	24.3306	24.7967	24.4529	24.5043	24.3693	24.407	24.6677	24.7077	24.6815	24.4152	24.3867
B2RWE8;Q8BGD9	Eukaryotic translation initiation factor 4B	Eif4b	-0.191953	0.0850326	0.822181		0.815596		20.4369	19.8349	18.1669	20.2463	17.6432	19.707	21.5787	18.6872	19.2619	18.0532	3	3	3	15.6	15.6	15.6	46.478	0	6.1843	31282000	3	20.1245	20.4993	20.687	18.6003	20.4405	20.464	17.9696	18.2043	18.3269	20.8195	19.6732	NaN	NaN	17.6432	NaN	19.4755	20.1107	19.5349	20.3932	21.8937
A0A0G2JFB4;A0A0G2JGT5;A0A0G2JH04;P63073	Eukaryotic translation initiation factor 4E	Eif4e	-0.307018	0.199318	0.631949		0.606136		21.2222	22.6367	21.3844	23.5819	20.7603	21.5137	23.479	22.1425	22.0845	21.9009	2	2	2	40.9	40.9	40.9	15.057	0	15.658	171240000	5	21.5542	NaN	20.8902	23.7843	21.7546	22.3713	20.7715	22.3445	21.0372	23.2764	23.3795	24.0898	20.7603	NaN	NaN	20.2723	22.7028	21.566	22.8094	24.0095
Q9WUK2-2;Q9WUK2	Eukaryotic translation initiation factor 4H	Eif4h	-0.197455	0.515216	0.30534		0.37158		24.3202	23.3666	23.7215	24.1688	24.1765	24.0624	24.2183	24.1564	24.0846	24.2191	4	4	4	29.4	29.4	29.4	25.186	0	153.3	540300000	55	24.2721	24.329	24.3594	24.1427	24.0813	21.8757	23.8238	23.8061	23.5347	24.1802	24.1607	24.1654	24.1739	24.1103	24.2454	24.2181	23.866	24.1032	24.1854	24.1582
A0A1Y7VNP4;A0A1Y7VJG2;Q8BVV6;P59325	Eukaryotic translation initiation factor 5	Eif5	-0.229459	0.598695	0.251944		0.302403		21.2637	20.9788	20.9023	21.1965	21.1139	21.6229	21.8298	20.9072	21.1184	21.1242	3	3	3	30.8	30.8	30.8	16.497	0	3.3482	61571000	26	NaN	NaN	21.2637	20.5647	21.527	20.8446	NaN	NaN	20.9023	21.6554	20.5825	21.3515	NaN	NaN	21.1139	21.5805	21.1354	22.1528	22.1592	21.7067
P63242;A0A0A0MQM0;Q8BGY2	Eukaryotic translation initiation factor 5A-1;Eukaryotic translation initiation factor 5A;Eukaryotic translation initiation factor 5A-2	Eif5a;Eif5a2	-0.140133	0.105718	0.783939		0.784931		25.5952	26.014	26.382	27.1614	26.2258	24.9349	27.3834	26.6105	26.1651	26.9852	5	5	5	55.2	55.2	55.2	16.832	0	323.31	3177300000	53	25.8507	26.037	24.898	27.2568	23.4142	27.3711	25.5564	26.909	26.6806	27.2135	27.1622	27.1084	26.1024	26.0187	26.5563	25.9724	22.9427	25.8894	27.1773	27.4907
O55135;A6PWZ2	Eukaryotic translation initiation factor 6	Eif6	-0.0837265	0.339842	0.457255		0.630537		22.0232	22.3387	22.3759	22.0643	22.115	22.5527	22.3062	22.2013	22.0975	22.1781	3	3	3	17.1	17.1	17.1	26.511	0	8.793	151780000	9	22.0523	22.2654	21.7519	22.3773	22.2423	22.3965	22.1526	23.03	21.945	22.1124	21.8572	22.2235	22.2662	22.1049	21.9739	22.5533	22.8577	22.2472	22.2936	22.0963
P70372	ELAV-like protein 1	Elavl1	0.108493	0.4977	0.317907		0.507954		25.3202	25.3385	25.1377	24.8566	25.2205	25.2168	25.0081	24.9057	25.0814	25.1192	13	13	13	45.1	45.1	45.1	36.169	0	47.292	1107000000	90	25.2469	25.4604	25.2534	25.2702	25.4889	25.2562	25.0198	25.2576	25.1358	24.9759	24.9633	24.6306	25.0978	25.3181	25.2456	25.0859	25.4066	25.1578	25.0763	24.9842
A0A2I3BPX9;Q60775	ETS-related transcription factor Elf-1	Elf1	0.48974	1.24586	0.0567727		0.0529712		19.7609	19.9768	19.7436	20.6799	19.806	19.4099	NaN	19.6057	19.3041	19.6951	2	2	2	4.9	4.9	4.9	62.29	0.004717	1.7241	22798000	4	19.3985	19.6869	20.1975	NaN	19.8637	20.0899	19.9516	19.6394	19.6399	20.4333	20.3763	21.23	19.7672	19.8279	19.823	19.5405	19.2794	NaN	NaN	NaN
Q8BPU7;Q8BPU7-3	Engulfment and cell motility protein 1	Elmo1	0.275392	0.523314	0.299699		0.310498		22.4857	22.6415	21.8815	22.9866	22.4552	22.493	22.3812	22.3822	22.2772	21.5399	8	8	8	18.2	18.2	18.2	83.935	0	41.976	182760000	35	22.8306	22.4881	22.1383	22.5646	22.5888	22.7712	22.6193	21.8899	21.1351	23.5831	22.3499	23.0268	22.6758	22.3604	22.3295	22.6505	22.4769	22.3514	22.4748	22.3795
M0QWY0;M0QWP2;O70378	ER membrane protein complex subunit 8	Emc8	0.111086	0.432679	0.36925		0.532417		19.8658	NaN	19.5941	19.8261	19.7577	19.3947	19.8698	19.6664	NaN	19.6684	2	2	2	20.3	20.3	20.3	14.376	0.0027836	1.852	18948000	5	19.7721	19.8923	19.9329	NaN	NaN	NaN	19.6104	19.6233	19.5486	19.6083	19.8844	19.9855	19.7263	19.7891	NaN	19.4742	19.6738	19.0361	19.6406	NaN
F6W2Q5;Q5JC28;H3BK65;P42567;A0A0R4J0A0;P42567-2	Epidermal growth factor receptor substrate 15	Eps15	-0.0342281	0.0438705	0.903919		0.925675		21.0173	20.0007	20.6358	19.711	19.7253	19.9568	20.497	20.2933	20.2514	20.2626	3	3	3	5.4	5.4	5.4	83.593	0	27.909	37749000	9	20.8503	21.1489	21.0527	19.379	20.3737	20.2493	20.914	20.972	20.0213	19.4494	19.7719	19.9116	20.4371	17.7047	21.0342	20.5483	18.8512	20.4709	NaN	20.3332
P57759	Endoplasmic reticulum resident protein 29	Erp29	0.0858398	0.269787	0.537296		0.663962		22.3156	22.6627	23.0622	22.5541	22.5789	22.3695	22.6657	22.5512	22.6572	22.5008	6	6	6	31.3	31.3	31.3	28.823	0	4.9073	185730000	10	22.4265	22.0828	22.4375	22.6196	22.6804	22.6881	22.476	NaN	23.6483	22.3286	22.5749	22.759	22.6259	22.4557	22.6553	22.7383	21.8039	22.5662	22.6236	22.6448
Q9D1Q6	Endoplasmic reticulum resident protein 44	Erp44	-0.204728	0.201788	0.628365		0.6303		22.7454	22.6445	21.0068	22.615	22.436	22.6481	22.7301	22.7264	21.5211	22.8457	5	5	5	16.7	16.7	16.7	46.852	0	95.867	186830000	18	22.6337	22.6787	22.9238	22.8012	22.8726	22.2596	22.3332	22.6731	18.0142	22.8119	22.3819	22.6513	22.4734	22.5637	22.2709	23.0605	22.1263	22.7575	23.2412	22.2368
H3BJP2;H3BLJ9;H3BJL6;H3BKH6;Q9R0P3;H3BK43	S-formylglutathione hydrolase	Esd	0.247134	1.17667	0.0665785		0.136779		22.6053	22.2708	22.512	22.0911	22.2087	22.006	21.9151	22.2415	22.0432	22.2464	5	5	5	30.8	30.8	30.8	27.131	0	6.6517	147240000	15	23.0858	22.57	22.1602	22.4945	22.4082	21.9098	22.798	22.4783	22.2597	21.9714	22.1242	22.1778	21.8206	22.183	22.6223	22.3807	22.046	21.5914	22.2086	21.411
Q3U7R1-2;Q3U7R1;A0A1W2P784	Extended synaptotagmin-1	Esyt1	0.0897938	0.183561	0.655299		0.718816		21.9321	21.5332	22.427	22.1706	22.0049	22.2098	21.7626	22.2186	21.8452	21.5826	7	7	7	11.2	11.2	11.2	99.672	0	8.9147	134370000	43	21.5939	22.1512	22.0514	20.6917	23.5566	20.3513	22.9441	22.6066	21.7302	22.0572	22.0374	22.4172	22.043	21.6891	22.2826	22.3065	22.2308	22.0923	22.2634	21.6494
Q99LC5	Electron transfer flavoprotein subunit alpha, mitochondrial	Etfa	0.296378	1.02176	0.095114		0.132999		24.1131	23.4933	24.233	24.2255	24.1868	23.7762	23.9656	23.5339	23.7488	23.7453	9	9	9	42	42	42	35.009	0	30.267	492580000	51	23.9272	24.2859	24.1261	24.1703	23.5327	22.7769	24.2571	24.4931	23.9487	24.3472	23.8868	24.4425	24.2858	24.0854	24.1893	23.7253	24.0293	23.5742	23.7652	24.2542
Q5SUT0;Q5SUS9;Q61545	RNA-binding protein EWS	Ewsr1	-0.43789	0.623841	0.237771		0.201411		20.1824	22.0653	21.783	21.7596	21.4768	22.1403	22.0522	21.783	21.6463	21.8348	2	2	2	3.6	3.6	3.6	64.988	0	5.44	104200000	10	22.0148	18.6221	19.9105	21.9267	NaN	22.2039	NaN	21.9343	21.6317	21.7093	21.4345	22.1351	21.9578	20.8225	21.6501	22.3461	23.152	20.9228	21.9332	21.7323
Q9DAA6;Q9DAA6-2	Exosome complex component CSL4	Exosc1	-0.00638809	0.0133496	0.969729		0.979237		19.0498	19.2736	19.3685	18.9766	19.3016	19.3659	18.681	19.5302	19.2824	19.1425	2	2	2	14.4	14.4	14.4	21.423	0.0014306	1.979	12765000	3	19.2189	NaN	18.8808	19.1169	19.035	19.6688	NaN	NaN	19.3685	18.7367	18.9625	19.2305	19.3212	19.1101	19.4736	19.0568	NaN	19.675	19.0298	18.3402
A2AV19;Q8VBV3;A0A0A6YW57	Exosome complex component RRP4	Exosc2	0.144666	0.269632	0.537487		0.590047		20.3028	20.3814	20.2689	19.5532	20.6258	20.3272	20.0919	20.1543	19.5678	20.2677	2	2	2	8.5	8.5	8.5	27.308	0.0014535	2.0537	30885000	12	20.3163	20.3519	20.2404	20.2989	20.4109	20.4343	20.78	NaN	19.7578	18.0888	20.1857	20.3852	20.6258	NaN	NaN	20.3637	NaN	20.2906	20.2038	20.0988
Q7TQK4;F6TGV1	Exosome complex component RRP40	Exosc3	-0.319166	0.339673	0.457433		0.4277		20.6568	19.2544	20.4997	19.3968	19.7662	19.7674	21.1242	20.7463	19.844	19.6878	4	4	4	30.7	30.7	30.7	29.546	0	6.9541	33541000	8	20.2888	20.9492	20.7323	19.3503	20.1962	18.2167	20.548	20.4935	20.4575	18.7175	21.1236	18.3491	19.5752	19.2054	20.5179	18.8976	19.45	20.9545	NaN	21.1242
Q9D0M0	Exosome complex exonuclease RRP42	Exosc7	0.840947	0.884306	0.130525		0.0726787		21.3308	21.4333	20.4697	21.2851	21.0717	20.5079	20.8454	18.7685	NaN	20.9868	1	1	1	3.4	3.4	3.4	31.825	0.0034153	1.7738	52524000	14	21.3994	21.1626	21.4303	21.7024	21.3874	21.21	21.8094	21.0909	18.5087	21.3154	21.0787	21.4611	21.3286	NaN	20.8147	21.4963	18.5195	21.5078	21.0268	20.6641
Q9JHI7;A0A0G2JFV9	Exosome complex component RRP45	Exosc9	0.197956	1.29343	0.0508822		0.165313		21.2207	21.2915	21.1696	21.0946	21.3171	21.0159	21.1958	20.7802	21.1678	20.9439	3	3	3	8.4	8.4	8.4	48.936	0	3.5213	68396000	17	21.3861	21.0053	21.2708	21.3736	21.3656	21.1353	21.1323	21.3415	21.035	21.0384	21.0475	21.198	21.0495	21.4925	21.4092	21.0089	21.0491	20.9897	21.0248	21.2477
P26040	Ezrin	Ezr	-0.221498	0.326842	0.471149		0.481392		23.968	23.5197	23.8667	24.9493	23.9255	24.3405	24.3995	24.6021	23.6172	24.3772	17	11	11	29.7	22.5	22.5	69.406	0	17.603	608500000	46	23.2048	24.1211	24.5781	23.5522	23.1664	23.8405	23.8794	23.5419	24.1787	24.7397	25.2128	24.8955	24.0535	23.8367	23.8861	24.0062	24.4423	24.5731	24.2978	24.2933
Q3TGF2;H3BLE6;H3BLM7;H9H9T1;A0A2I3BR29	Protein FAM107B	Fam107b	0.508622	0.876342	0.132941		0.102789		21.6329	21.6788	21.7436	21.2301	22.3394	22.0313	21.5346	20.7787	20.961	20.776	2	2	2	19.8	19.8	19.8	15.572	0	43.279	78477000	13	21.6044	21.6614	NaN	NaN	NaN	21.6788	21.5695	21.5599	22.1014	NaN	21.2301	NaN	22.751	NaN	21.9278	21.4046	21.1454	23.5438	22.5218	21.1151
Q8VE88-2;Q8VE88	Protein FAM114A2	Fam114a2	0.431688	0.382443	0.414531		0.361297		21.169	21.476	20.8972	22.4059	20.5883	19.7541	NaN	20.8625	21.5222	21.3637	1	1	1	8.4	8.4	8.4	53.375	0	8.7657	50145000	4	21.4483	21.236	20.8228	21.3786	NaN	21.5734	20.3983	20.8365	21.4567	22.4059	NaN	NaN	20.2137	20.811	20.7403	NaN	NaN	19.7541	NaN	NaN
Q921M7;A0A2I3BRN5;A0A2I3BPH9	Protein FAM49B	Fam49b	-0.108381	0.133894	0.734693		0.757612		23.1356	22.3608	22.7992	23.1459	22.5354	23.2932	23.5511	22.6593	22.9914	22.0238	9	9	9	38	38	38	36.776	0	20.764	245310000	27	23.0283	23.1298	23.2488	22.945	22.7747	21.3627	23.1242	22.3198	22.9536	23.083	22.8988	23.4559	23.0133	22.7914	21.8014	23.544	23.0049	23.3306	23.728	23.5076
Q9WV03	Protein FAM50A	Fam50a	-0.379502	1.05044	0.0890355		0.0972556		20.7519	NaN	20.714	20.2128	20.7183	20.6874	21.4022	20.7069	20.9316	21.1656	2	2	2	5.9	5.9	5.9	40.251	0.0053015	1.6784	38023000	5	NaN	20.9862	20.5175	NaN	NaN	NaN	20.6775	20.6565	20.8081	20.562	19.8636	NaN	21.081	20.3698	20.7043	20.5752	20.7995	NaN	21.4022	NaN
Q922J9-2;Q922J9-3;Q922J9;Q922J9-4;D3Z5W6;D3Z4N9	Fatty acyl-CoA reductase 1	Far1	-0.0618275	0.230814	0.587741		0.729883		22.0233	22.5794	22.3488	22.3456	22.406	22.4165	22.4481	22.4743	22.512	22.1612	5	5	5	25	25	25	29.508	0	9.4624	165130000	46	22.0185	21.7721	22.2793	22.5588	22.6787	22.5008	22.6736	22.3745	21.9982	22.6258	21.7983	22.6126	22.4394	22.2434	22.535	22.315	22.6492	22.2853	22.4104	22.4783
A0A0R4J1D9;Q3TNB8;O88842-2;O88842	FYVE, RhoGEF and PH domain-containing protein 3	Fgd3	-0.367075	0.0578381	0.87531		0.86704		20.4482	17.1007	19.6211	25.434	NaN	19.4359	18.1379	22.0312	NaN	24.4674	1	1	1	3.2	3.2	3.2	58.8	0.0027586	1.8125	263150000	5	NaN	21.7635	19.1328	NaN	17.1007	NaN	20.0015	NaN	19.2407	NaN	24.7427	26.1254	NaN	NaN	NaN	19.6625	19.2092	NaN	17.6118	19.4708
P45878	Peptidyl-prolyl cis-trans isomerase FKBP2	Fkbp2	0.097253	0.137744	0.728209		0.760015		21.171	22.1185	22.1706	22.0638	21.9947	22.0368	21.9911	21.0278	21.9099	22.0668	2	2	2	18.6	18.6	18.6	15.344	0.00074294	2.1641	104500000	2	NaN	21.171	NaN	22.2139	22.1336	22.0079	22.0891	22.2521	NaN	21.9894	22.0432	22.1588	22.0408	NaN	21.9487	22.165	22.1439	21.8015	22.26	21.7653
Q64378;A0A3B2WBD2	Peptidyl-prolyl cis-trans isomerase FKBP5;Peptidyl-prolyl cis-trans isomerase FKBP5, N-terminally processed	Fkbp5	-0.00519753	0.0206464	0.953572		0.976253		22.8769	22.6075	22.417	22.5506	22.7083	22.5894	22.7907	22.6252	22.5842	22.5969	9	9	9	22.6	22.6	22.6	50.966	0	10.452	198700000	38	22.8067	22.665	23.1592	22.445	22.6923	22.6851	22.6184	22.1168	22.5157	22.4212	22.9977	22.2329	22.6535	22.6669	22.8047	22.0159	22.5309	23.2215	22.8372	22.7895
A2AB60;A0A1W2P6X3;Q9JL26-2;Q9JL26	Formin-like protein 1	Fmnl1	0.102515	1.15643	0.0697549		0.384833		23.5588	23.8201	23.632	23.6777	23.6517	23.5647	23.5601	23.5395	23.6526	23.5108	8	8	8	8.9	8.9	8.9	121.54	0	10.962	442240000	52	23.589	23.4645	23.6228	23.8941	23.6863	23.8797	23.6966	23.5221	23.6773	23.5843	23.5621	23.8867	23.6645	23.7048	23.5858	23.7585	23.4763	23.4594	23.5557	23.754
A2AQ43;A2AQ44;A2AQ42;A2AQ45;A2AQ41;Q80TY0-2;Q80TY0-3;Q80TY0;A0A0A6YWT1;F6VVN1;Q80TY0-5;Q80TY0-4	Formin-binding protein 1	Fnbp1	-0.126108	0.307308	0.492824		0.579693		21.8398	22.0748	22.1246	21.939	22.0238	22.5486	22.2969	21.5609	22.2497	21.9763	3	3	3	5.8	5.8	5.8	64.628	0	3.8294	141980000	25	21.8335	22.0244	21.6615	22.1703	21.9788	22.0752	22.1082	22.013	22.2527	21.7367	21.8475	22.2327	21.8987	22.05	22.1227	22.4271	22.5941	22.6247	22.4846	22.2394
P97376	Protein FRG1	Frg1	0.0250119	0.118248	0.761643		0.883142		20.6688	20.9565	NaN	20.9486	20.9605	20.9949	20.8426	20.8215	20.7377	20.8963	2	2	2	9.7	9.7	9.7	29.127	0	3.0454	47866000	17	20.9885	20.3492	NaN	20.4906	NaN	21.4223	NaN	NaN	NaN	20.7908	20.9591	21.096	20.897	21.0291	20.9553	21.053	20.9268	21.0047	21.2818	20.6457
Q3TUE1;A0A0G2JGW9;A0A0G2JFY5;Q3UUU2;Q91WJ8;Q91WJ8-2;A0A0G2JG00;A0A0G2JFK2	Far upstream element-binding protein 1	Fubp1	0.114629	0.200198	0.63067		0.680197		22.9785	23.1696	22.1661	22.9625	22.8904	23.1881	22.7549	22.2438	22.7539	22.6532	10	8	8	18.8	16.5	16.5	67.443	0	10.336	229260000	38	22.9478	22.8429	23.1449	23.2342	23.3149	22.9597	22.6532	22.6352	21.2099	23.0554	22.3975	23.4347	22.8329	22.8608	22.9773	23.2306	23.0134	23.3203	22.8281	22.7554
G3UXT7;Q8CFQ9;P56959;F6QCI0;Q8BQ46	RNA-binding protein FUS	Fus;Taf15	0.320242	0.419104	0.380974		0.359815		23.6255	23.5593	23.2452	23.8839	24.3679	23.7252	24.1498	22.4145	23.5416	23.2494	4	4	4	40.8	40.8	40.8	13.897	0	10.815	458360000	32	24.0909	23.7784	23.0074	22.9364	23.6999	24.0415	24.767	20.9198	24.0486	24.1455	24.0175	23.4889	24.0795	24.7175	24.3065	24.3483	22.8438	23.9835	24.4121	23.942
P97855	Ras GTPase-activating protein-binding protein 1	G3bp1	-0.104439	0.629827	0.234516		0.470853		23.6947	23.6158	23.5668	23.4692	23.6434	23.6819	23.9157	23.7459	23.7005	23.4681	6	6	5	15.7	15.7	14	51.828	0	39.783	398140000	32	23.4282	23.8795	23.7765	23.6017	23.6299	23.6158	23.5153	23.5094	23.6756	23.2524	23.6333	23.5218	23.6503	23.5331	23.7467	23.9882	23.2006	23.8568	24.079	23.7901
P97379-2;P97379	Ras GTPase-activating protein-binding protein 2	G3bp2	0.160615	0.131755	0.738321		0.740242		20.0566	20.0716	19.4079	21.6485	19.5062	19.8219	20.4241	20.3986	19.1566	20.0867	4	3	3	12.9	11.1	11.1	50.784	0	3.3749	26044000	4	20.1814	20.0193	19.969	20.2322	20.0296	19.953	19.9428	19.7001	18.5809	NaN	NaN	21.6485	18.6845	20.0613	19.7729	19.3841	19.8608	20.2207	20.0874	20.1292
Q00612;A3KG36	Glucose-6-phosphate 1-dehydrogenase X;Glucose-6-phosphate 1-dehydrogenase	G6pdx	-0.0392509	0.0860237	0.820307		0.876482		21.3998	21.7301	21.3366	20.9905	21.4295	21.5808	21.4447	21.594	20.9554	21.5076	4	4	4	9.5	9.5	9.5	59.262	0	3.6271	81336000	8	21.1305	21.4198	21.649	21.6038	21.7422	21.8442	21.3275	21.3458	NaN	20.9673	21.0556	20.9485	21.7173	21.2802	21.2909	21.1464	21.9882	21.6079	21.5054	21.6878
A0A0R4J0F6;Q99KY4-2;Q99KY4	Cyclin-G-associated kinase	Gak	0.116745	0.156778	0.696983		0.726596		18.5963	19.2517	NaN	19.2497	19.879	19.4298	18.9824	18.923	19.1745	NaN	2	2	2	1.7	1.7	1.7	143.67	0.005291	1.6679	8156400	2	NaN	18.5963	NaN	NaN	19.3636	19.1399	NaN	NaN	NaN	19.2593	19.2401	NaN	NaN	19.879	NaN	19.4298	NaN	NaN	19.1466	18.7013
O08912	Polypeptide N-acetylgalactosaminyltransferase 1;Polypeptide N-acetylgalactosaminyltransferase 1 soluble form	Galnt1	0.196018	0.355698	0.440861		0.472394		19.1667	19.6401	18.9522	19.0182	18.9304	18.8967	18.2027	19.1611	19.0641	19.4027	1	1	1	2.1	2.1	2.1	64.254	0.0040568	1.7307	15093000	9	19.3414	19.0844	19.0741	19.168	19.8255	19.9267	NaN	18.9284	18.9759	19.2154	19.0584	18.7807	18.8315	18.9837	18.9759	18.886	19.2071	18.597	16.4773	18.8601
Q8BHN3;Q8BHN3-2;Q8BHN3-3	Neutral alpha-glucosidase AB	Ganab	0.136962	1.07788	0.0835827		0.299357		25.3147	25.4949	25.4159	25.1379	25.3742	25.3198	25.1299	25.2229	25.1425	25.2376	22	22	22	31.4	31.4	31.4	106.91	0	49.456	1260300000	155	25.4753	25.1307	25.3382	25.4002	25.5727	25.5119	25.3343	25.4879	25.4255	25.2884	24.9931	25.1321	25.2541	25.4241	25.4445	25.276	25.4569	25.2266	25.1999	25.1686
D3YZ09;Q9CY66-3;Q9CY66-2;Q9CY66	H/ACA ribonucleoprotein complex subunit 1	Gar1	-0.198348	1.21862	0.0604479		0.175604		21.0485	21.0356	20.8946	20.8468	21.1981	21.1893	21.4608	21.1087	21.149	21.1075	2	2	2	15.7	15.7	15.7	20.448	0	3.8581	60196000	5	20.6673	21.4651	21.013	21.0356	NaN	NaN	20.7438	20.939	21.001	20.899	20.8178	20.8235	20.7995	21.5968	NaN	21.1349	21.1939	21.2389	21.4976	21.3901
Q64737	Trifunctional purine biosynthetic protein adenosine-3;Phosphoribosylamine--glycine ligase;Phosphoribosylformylglycinamidine cyclo-ligase;Phosphoribosylglycinamide formyltransferase	Gart	-0.337005	1.27004	0.053698		0.0823218		23.6133	23.0409	23.79	23.6486	23.5268	24.1195	23.8498	23.7607	23.9079	23.6667	14	14	14	26	26	26	107.5	0	23.015	428230000	66	23.263	23.5219	24.0549	23.3681	23.6956	22.0591	23.7303	24.7174	22.9222	23.5999	23.8432	23.5028	23.4456	23.7308	23.4039	24.2205	24.1597	23.9784	23.9022	23.9064
Q91Z40		Gbp7	0.20957	0.227129	0.592749		0.595916		20.817	21.1273	20.7477	20.7747	20.9475	21.3092	21.0643	20.7236	19.2423	21.0271	4	4	4	6.9	6.9	6.9	72.72	0	3.5848	58779000	14	20.8166	20.9172	20.7173	21.1436	21.2183	21.0201	20.867	20.3972	20.9789	20.8253	20.675	20.8238	20.9682	20.8382	21.0362	21.2171	21.1078	21.6027	21.1602	20.9441
F6VNW5;H3BJA3;O09172	Glutamate--cysteine ligase regulatory subunit	Gclm	-0.30731	0.388236	0.409038		0.390921		19.3549	19.0017	NaN	19.4723	19.3534	19.4001	18.6973	20.5529	19.6329	19.7311	2	2	2	15.7	15.7	15.7	16.997	0.00073801	2.1351	15759000	9	NaN	19.6435	19.0663	19.0001	19.0034	NaN	NaN	NaN	NaN	NaN	18.8801	20.0645	19.6466	19.0603	NaN	19.3848	19.607	19.2087	19.8159	16.7653
Q61598;Q61598-2	Rab GDP dissociation inhibitor beta	Gdi2	-0.101993	0.903092	0.124999		0.419924		25.7003	25.3909	25.5102	25.5222	25.5106	25.6637	25.7339	25.583	25.5432	25.6202	14	14	12	40.7	40.7	34.2	50.537	0	219.08	1517300000	126	25.7487	25.6476	25.7045	25.4453	25.0423	25.6851	25.4998	25.5619	25.4689	25.4323	25.4234	25.7109	25.7178	25.4111	25.4029	25.6696	25.741	25.5805	25.7439	25.7865
D3Z4J5;Q9D1H7;D3Z7S0;Q9D1H7-2	Golgi to ER traffic protein 4 homolog	Get4	-0.256046	0.594918	0.254145		0.285628		20.1505	19.9608	19.5824	19.6291	19.7802	20.1167	20.6929	19.5768	20.0268	19.9701	3	3	3	16.7	16.7	16.7	27.58	0	5.3502	32108000	9	20.4129	19.9228	20.1158	20.079	20.1023	19.7012	19.7622	19.3212	19.6637	19.6523	19.6234	19.6116	19.5383	19.725	20.0774	20.1303	20.3991	19.8207	20.6538	20.5522
Q8K0D5	Elongation factor G, mitochondrial	Gfm1	-0.0624126	0.0852806	0.821712		0.853365		20.0944	19.984	18.8417	20.1193	20.2934	19.8724	19.752	19.978	19.9197	20.1228	2	2	2	2.8	2.8	2.8	83.549	0.002751	1.806	21673000	4	20.0566	20.0317	20.195	19.8513	20.1167	NaN	17.8742	19.8093	NaN	NaN	20.0493	20.1893	NaN	20.2934	NaN	20.0167	19.7282	19.8724	19.4256	20.0784
P23780	Beta-galactosidase	Glb1	-0.000813293	0.0012998	0.997012		0.997725		20.0452	20.6863	20.7422	20.6432	20.8964	20.5146	20.8793	20.1704	21.0085	20.4445	3	3	3	5.7	5.7	5.7	73.12	0	3.479	44579000	8	19.6979	20.7771	19.6606	20.8678	NaN	20.5048	20.6087	20.7634	20.8544	20.6441	20.4333	20.8521	20.7662	20.8289	21.094	20.6224	20.8	20.1214	20.8156	20.7731
F8WHM5;Q61543	Golgi apparatus protein 1	Glg1	0.029829	0.0830026	0.826033		0.890365		20.2578	19.9441	20.5461	20.562	20.5134	20.5506	20.3242	20.231	20.2752	20.2934	2	2	2	2	2	2	132.35	0	2.3664	37761000	4	20.871	NaN	19.6446	20.793	NaN	19.0952	20.3811	20.632	20.6252	20.484	20.5609	20.6411	20.5698	20.5718	20.3986	NaN	20.5597	20.5414	20.4153	20.3908
F6ZTG3;E9Q197;Q9CPV4-3;Q9CPV4-2;Q9CPV4	Glyoxalase domain-containing protein 4	Glod4	-0.0275341	0.142482	0.720308		0.864592		21.6385	21.7527	21.5629	21.4945	21.5677	21.7922	21.7608	21.5145	21.5379	21.5486	4	4	4	24.5	24.5	24.5	23.581	0	13.83	96717000	36	21.787	21.4721	21.6565	21.7643	21.788	21.7059	21.6647	21.3702	21.6538	21.2558	21.6283	21.5993	21.649	21.4997	21.5543	21.7192	21.8008	21.8566	21.795	21.5869
A0A1Y7VM65;Q9QUH0	Glutaredoxin-1	Glrx	-0.604911	0.683305	0.207346		0.145547		21.9774	21.765	21.054	22.2793	22.649	22.3888	23.8725	22.0124	22.5502	21.9255	3	3	3	64.3	64.3	64.3	9.3868	0	11.338	201200000	5	21.9653	21.5217	22.4452	21.1323	21.2288	22.934	NaN	20.6503	21.4577	22.1241	22.4656	22.2483	22.9821	NaN	22.3159	22.9849	21.7669	22.4146	23.1131	25.5867
Q9CQM9;A0A1B0GS58;A0A1B0GT04	Glutaredoxin-3	Glrx3	-0.0751152	0.344631	0.45224		0.647276		23.5071	23.2839	23.1948	23.1798	23.2105	23.4466	23.4759	23.0678	23.3962	23.3651	6	6	6	29.4	29.4	29.4	37.778	0	14.383	322690000	22	23.6119	23.4038	23.5055	23.1345	23.3097	23.4074	22.9542	23.1349	23.4952	23.0853	23.2516	23.2024	23.1573	23.2992	23.1749	23.106	23.8225	23.4112	23.5295	23.5058
D3Z7P4;D3Z7P3-2;D3Z7P3	Glutaminase kidney isoform, mitochondrial	Gls	0.674904	0.968944	0.107413		0.0685494		22.6695	21.4797	22.7784	21.3455	22.6692	20.852	21.9584	21.3743	21.8141	21.569	6	6	6	17.7	17.7	17.7	54.781	0	15.614	139100000	35	22.81	22.3333	22.8651	21.7995	20.3201	22.3194	22.8981	22.7522	22.685	22.6073	22.7923	18.637	22.6675	22.45	22.8901	20.9112	20.9813	20.6634	21.6582	22.3433
F6QL70;Q5M8M8;P47915	60S ribosomal protein L29	Gm17669;Rpl29	-1.83663	0.744931	0.179915		0.0805841		20.6606	17.5263	NaN	22.6077	19.7512	22.68	NaN	21.5516	20.5047	23.1559	1	1	1	7.1	7.1	7.1	16.966	0.0014472	2.0244	78383000	6	NaN	20.6903	20.6309	17.3602	17.6923	NaN	NaN	NaN	NaN	NaN	22.2234	22.992	NaN	22.362	17.1404	21.7881	23.572	NaN	NaN	NaN
E9PZF0;Q01768	Nucleoside diphosphate kinase;Nucleoside diphosphate kinase B	Gm20390;Nme2	-0.201891	0.96012	0.109618		0.218394		26.9444	27.1174	27.0811	26.8187	26.8882	27.3969	27.2758	26.819	27.1592	27.2084	13	13	4	73	73	21.3	30.2	0	158.18	4166000000	84	27.0961	26.7671	26.97	27.0967	27.0777	27.1778	26.9801	27.2659	26.9974	26.9033	26.6959	26.857	26.9006	26.8419	26.9222	27.3215	27.4227	27.4465	27.091	27.3093
Q8K0C9	GDP-mannose 4,6 dehydratase	Gmds	-0.0374359	0.0991217	0.795936		0.866414		18.5169	18.33	18.3751	18.0796	18.5588	18.2451	18.7675	18.4591	18.4636	18.1123	1	1	1	5.1	5.1	5.1	41.984	0.0065402	1.6278	8801900	1	18.4918	18.5677	18.4911	NaN	NaN	18.33	18.3653	18.233	18.527	18.3949	NaN	17.7644	18.4414	18.6763	NaN	18.4904	17.9998	NaN	17.8735	19.8117
Q8BTZ7	Mannose-1-phosphate guanyltransferase beta	Gmppb	-0.267825	1.05489	0.0881275		0.142952		20.0011	19.7744	19.7986	19.4344	20.1602	20.1458	19.949	20.0706	20.0198	20.3225	2	2	2	8.1	8.1	8.1	39.916	0.0007278	2.0607	21393000	4	20.0011	NaN	NaN	19.6918	NaN	19.8569	19.5203	19.8525	20.0228	NaN	19.4344	NaN	NaN	NaN	20.1602	20.3451	20.1542	19.9382	19.887	19.9492
P27601	Guanine nucleotide-binding protein subunit alpha-13	Gna13	0.27638	0.548921	0.282539		0.296056		21.2291	20.2293	21.1462	21.4053	21.1805	20.8639	20.8562	20.2908	20.8125	20.985	3	3	3	9.3	9.3	9.3	44.054	0	2.5925	62869000	4	21.2019	21.1925	21.2929	NaN	19.0716	21.3871	21.0849	21.1693	21.1845	21.3217	21.7816	21.1126	21.1586	21.2713	21.1116	20.8605	21.0013	20.7299	20.8572	20.886
Q8CI11-2;Q8CI11	Guanine nucleotide-binding protein-like 3	Gnl3	0.00305176	0.00646705	0.985219		0.987541		21.3579	21.3267	21.4539	21.227	21.2342	21.4868	20.704	21.5046	21.4114	21.4775	4	4	4	9.3	9.3	9.3	57.187	0	4.659	81484000	9	21.5291	21.1883	21.3561	21.1805	21.5259	21.2736	21.6645	21.2555	21.4417	21.2856	21.1488	21.2465	21.1808	21.1621	21.3595	21.8259	21.3422	21.2922	21.8282	18.5987
Q3ULJ0-2;Q3ULJ0	Glycerol-3-phosphate dehydrogenase 1-like protein	Gpd1l	-0.138835	0.228706	0.590601		0.633705		20.2645	19.8392	19.5722	20.0532	19.8679	20.5888	20.4648	19.8276	20.0304	19.3796	2	2	2	9.1	9.1	9.1	34.634	0	2.3258	14573000	8	20.2325	20.0691	20.492	19.4011	NaN	20.2772	19.5722	NaN	NaN	NaN	NaN	20.0532	NaN	NaN	19.8679	NaN	20.5888	NaN	NaN	20.4648
A2AQR0;Q64521	Glycerol-3-phosphate dehydrogenase;Glycerol-3-phosphate dehydrogenase, mitochondrial	Gpd2	-0.260476	0.979475	0.104839		0.161028		21.2983	21.6847	21.196	20.981	21.5237	21.6202	21.3249	21.6871	21.7336	21.6203	7	7	7	12.2	12.2	12.2	82.829	0	6.8066	84507000	10	21.096	21.5006	NaN	21.7493	21.569	21.7359	21.5175	20.5938	21.4766	22.1489	21.4376	19.3565	21.4128	21.6074	21.5509	21.6931	21.5965	21.5709	20.2485	22.0139
A0A140LJB7;Q3MIA8;B1ATU4;G3UXW9;Q99LD4;Q99LD4-2	COP9 signalosome complex subunit 1	Gps1	-0.0772209	0.202911	0.626742		0.718454		20.9117	20.2889	20.0888	20.245	20.4681	20.6212	20.5112	20.2743	20.4504	20.5315	3	3	3	6.6	6.6	6.6	55.034	0	3.3835	40464000	14	NaN	20.8847	20.9388	20.217	20.4266	20.2232	20.0825	19.6324	20.5514	20.3543	20.1672	20.2135	20.5901	20.3797	20.4344	20.339	20.8675	20.657	20.5855	20.5816
A0A0A6YY34;A0A0A6YVV2;P11352	Glutathione peroxidase;Glutathione peroxidase 1	Gpx1	-0.183816	0.327897	0.470005		0.508348		20.8575	20.506	21.2973	21.0087	20.3578	21.5695	21.0174	20.5225	20.7886	21.0483	4	4	4	36.8	36.8	36.8	16.353	0	4.7126	57960000	6	20.9916	20.6978	20.8831	20.9883	20.6233	19.9065	NaN	21.4416	21.153	21.1464	20.8555	21.0243	21.3839	19.0182	20.6712	21.2497	NaN	21.8894	21.2034	21.0141
S4R1E5;O70325-2;O70325;O70325-3	Glutathione peroxidase;Phospholipid hydroperoxide glutathione peroxidase, mitochondrial	Gpx4	-0.0698822	0.233349	0.58432		0.710545		22.1478	22.0567	22.3465	22.1791	22.279	22.5876	22.0949	22.2073	21.9985	22.4703	3	3	3	22.3	22.3	22.3	17.937	0	3.675	158830000	55	22.1803	22.1956	22.0674	22.6141	22.4719	21.0843	22.4311	22.4672	22.1411	22.116	22.1708	22.2505	22.1401	22.2002	22.4968	22.9365	22.5648	22.2614	22.2098	21.8795
B1AT92;Q60631;Q60631-2	Growth factor receptor-bound protein 2	Grb2	-0.053883	0.134795	0.73317		0.810184		21.3035	20.9972	21.5764	21.5671	21.2874	21.4677	21.1926	21.3242	21.7913	21.2253	4	4	4	21.7	21.7	21.7	23.587	0	4.032	80847000	7	21.4284	21.2307	21.2513	21.0563	20.2973	21.638	21.4603	21.6722	21.5966	NaN	21.4297	21.7045	21.733	20.6202	21.5092	21.3417	21.2611	21.8003	21.1357	20.7078
O35127	Protein C10	Grcc10	-0.23531	1.05441	0.0882247		0.161388		NaN	19.3484	19.653	NaN	19.4262	NaN	19.7618	NaN	19.7634	19.6083	2	2	2	22.2	22.2	22.2	13.194	0.0027855	1.8528	8974400	5	NaN	NaN	NaN	NaN	NaN	19.3484	19.4583	19.7455	19.7553	NaN	NaN	NaN	19.4262	NaN	NaN	NaN	NaN	NaN	NaN	NaN
Q99LP6	GrpE protein homolog 1, mitochondrial	Grpel1	0.34717	0.575223	0.265936		0.25125		22.2815	21.2635	22.0782	NaN	22.0141	21.236	22.0202	21.7809	21.7489	21.0248	2	2	2	9.2	9.2	9.2	24.307	0	8.1408	82767000	15	22.5101	NaN	22.0529	21.327	21.694	20.7694	NaN	22.4321	21.7243	NaN	NaN	NaN	22.0814	22.1155	21.8454	21.2993	21.1019	21.3066	21.8723	22.1681
D3Z7E5;Q2NL51	Glycogen synthase kinase-3 alpha	Gsk3a	0.170452	0.163357	0.686504		0.688387		21.2201	19.7744	19.7583	20.7088	20.6994	20.8842	20.2273	20.7141	20.2542	19.2288	1	1	1	7.8	7.8	7.8	51.245	0.007722	1.5482	44438000	2	22.3187	20.3766	20.9651	19.2084	NaN	20.3405	NaN	NaN	19.7583	NaN	20.7089	20.7087	20.6244	NaN	20.7743	21.0226	NaN	20.7458	19.4776	20.3934
P47791-2;P47791	Glutathione reductase, mitochondrial	Gsr	-0.239147	0.418343	0.381642		0.400121		20.7602	20.7876	19.5595	20.9807	20.7675	20.8897	20.8296	20.6865	20.8185	20.8269	3	3	3	8	8	8	51.073	0	3.0348	51123000	7	20.6062	20.9142	NaN	20.8204	20.7872	20.7552	18.3614	20.7577	NaN	21.5722	20.5014	20.8683	NaN	20.8326	20.7024	20.9694	20.8767	20.8231	21.0595	20.7123
P19157;P46425	Glutathione S-transferase P 1;Glutathione S-transferase P 2	Gstp1;Gstp2	0.0107914	0.0542132	0.882646		0.945526		24.1724	24.5093	24.3684	24.3427	24.4517	24.462	24.3972	24.2168	24.3248	24.3898	6	6	6	37.1	37.1	37.1	23.609	0	24.13	654050000	50	24.3591	24.1736	23.9845	24.4783	24.4048	24.6449	24.3266	24.3871	24.3915	24.4512	24.2336	24.3433	24.382	24.3856	24.5875	24.4842	24.5919	24.31	24.2322	24.4103
A0A0U1RPD8;Q8K284-2;Q8K284	General transcription factor 3C polypeptide 1	Gtf3c1	-0.124365	0.374636	0.42205		0.53881		20.6894	NaN	20.7752	20.5549	20.6945	20.9687	20.6074	20.4323	20.8961	21.1098	2	2	2	1.3	1.3	1.3	226.76	0.0027739	1.8265	36195000	2	20.5811	20.6004	20.8865	NaN	NaN	NaN	NaN	20.7719	20.7785	NaN	20.5946	20.5152	20.736	NaN	20.6531	20.9065	21.0309	NaN	20.4233	20.8123
O08582	GTP-binding protein 1	Gtpbp1	-0.442152	0.702111	0.198559		0.16492		19.1667	18.9899	18.7952	20.0779	NaN	19.3318	19.53	19.6364	19.689	20.3105	1	1	1	2.4	2.4	2.4	72.3	0.007727	1.5543	14588000	7	NaN	18.9153	19.418	18.5009	19.2151	19.2537	18.7649	NaN	18.8255	19.6832	20.4727	NaN	NaN	NaN	NaN	19.3111	19.0135	19.6709	NaN	19.4379
L7N451;Q80SU7	Interferon-induced very large GTPase 1	Gvin1	0.124725	0.291593	0.510984		0.592666		23.6929	22.9844	23.5734	23.3078	23.5694	23.347	23.452	23.4162	23.4965	22.7925	18	18	18	9.4	9.4	9.4	280.78	0	19.535	335030000	62	23.4795	23.8383	23.7609	22.5507	22.7253	23.6771	23.4483	23.6747	23.5972	23.2794	23.2194	23.4246	23.5473	23.7071	23.4538	23.4509	23.2704	23.3196	23.2935	23.5485
P01899;Q8HWB2	H-2 class I histocompatibility antigen, D-B alpha chain	H2-D1;H2-Q4	0.16649	0.915701	0.121423		0.274983		25.1208	25.3263	25.1914	24.8536	25.1336	25.1848	24.9289	24.9018	24.8666	24.9109	9	8	5	27.3	24.6	15.5	40.836	0	66.244	1077800000	107	25.2009	25.1345	25.027	25.4215	25.2248	25.3326	25.0575	25.2855	25.2312	24.7757	24.8824	24.9026	25.1607	25.1507	25.0893	25.1742	25.3131	25.067	25.0352	24.849
Q3THW5;P0C0S6;Q8R029	Histone H2A.V;Histone H2A.Z;Histone H2A	H2afv;H2afz	-0.427624	1.02832	0.0936875		0.0906646		24.9376	24.2798	24.8206	24.8913	24.4795	24.7164	25.7932	24.9115	24.9783	25.1475	5	3	3	53.9	46.9	46.9	13.509	0	323.31	1080600000	48	25.034	24.9002	24.8786	25.5065	22.8271	24.5059	24.8653	24.5938	25.0027	25.1789	25.0799	24.4151	24.1955	24.5585	24.6844	24.9299	24.6646	24.5547	25.5352	25.9736
P27661	Histone H2AX	H2afx	0.651101	0.535025	0.291726		0.213712		24.7679	23.4413	21.9936	23.6124	24.3468	21.8636	22.8856	23.4378	23.7954	22.9242	7	1	0	55.2	16.1	0	15.142	0	141.97	483050000	14	24.9137	24.5089	24.8812	23.441	NaN	23.4415	19.7508	23.2799	22.9502	22.9989	24.15	23.6884	24.6543	24.5499	23.8363	23.7437	22.3044	19.5427	18.4981	24.6842
Q9QZQ8;Q9QZQ8-2	Core histone macro-H2A.1	H2afy	-0.0512157	0.103106	0.788668		0.845079		25.4996	25.7759	25.6719	25.8015	24.8098	25.5815	25.6269	25.4932	25.5331	25.58	16	16	14	55.4	55.4	48.4	39.735	0	323.31	1561200000	131	25.4735	25.588	25.4373	25.6619	25.5993	26.0664	25.9289	25.7307	25.3563	25.7679	25.7208	25.916	25.4551	25.225	23.7492	25.4805	25.6358	25.6282	25.7552	25.6755
Q61425	Hydroxyacyl-coenzyme A dehydrogenase, mitochondrial	Hadh	0.467591	1.01434	0.0967513		0.0848931		22.0586	21.6172	21.7534	21.8968	21.2261	20.5231	21.1131	21.3348	21.67	21.5729	3	3	3	14.3	14.3	14.3	34.463	0	4.2432	92320000	16	22.061	22.0162	22.0985	21.8506	22.0216	20.9793	21.542	22.144	21.5741	21.7829	21.8332	22.0742	22.029	21.9963	19.6528	20.4862	20.1592	20.924	20.7801	21.1686
Q99JY0;D3YXU1	Trifunctional enzyme subunit beta, mitochondrial;3-ketoacyl-CoA thiolase	Hadhb	0.420567	1.17208	0.0672855		0.0723041		22.0015	22.3716	22.533	22.2752	21.4161	21.6959	21.5933	21.6627	21.768	21.7747	7	7	7	16.2	16.2	16.2	51.386	0	6.8851	124540000	25	21.9223	22.0486	22.0338	22.3228	22.4901	22.3021	22.603	22.608	22.3878	22.2527	21.9754	22.5976	21.9269	22.3683	19.9532	21.6007	21.7285	21.7586	21.7063	21.1793
A2ATU9;Q8BY71	Histone acetyltransferase type B catalytic subunit	Hat1	-0.0801562	0.429273	0.372158		0.603307		19.1851	19.2465	NaN	19.1146	19.2556	19.4653	19.1025	19.3668	19.1352	19.3333	1	1	1	3.1	3.1	3.1	50.182	0.0052666	1.6572	14251000	6	18.9002	19.0826	19.5724	19.1839	19.3091	NaN	NaN	NaN	NaN	19.0887	19.1405	NaN	NaN	NaN	19.2556	19.3451	19.5141	19.5366	18.8843	19.1248
P49710	Hematopoietic lineage cell-specific protein	Hcls1	0.194597	1.11881	0.0760664		0.197899		24.1122	23.9429	24.1335	23.8211	24.1789	24.0959	23.8402	23.771	23.8139	23.6946	11	11	11	23.7	23.7	23.7	54.24	0	20.815	473960000	40	24.145	24.0786	24.1129	24.4114	23.5587	23.8587	24.2394	24.1142	24.0469	23.594	23.5766	24.2928	24.3286	24.1033	24.1048	24.0712	24.0105	24.2061	23.8084	23.8479
O09106;Q8BQ10;A0A0R4J008;P70288	Histone deacetylase 1;Histone deacetylase 2	Hdac1;Hdac2	0.221914	0.757034	0.174971		0.251075		23.7831	24.1044	23.5343	23.9787	23.6709	23.6698	23.3283	23.4509	23.9612	23.5516	9	9	9	25.5	25.5	25.5	55.074	0	126.73	435850000	45	23.0969	24.1982	24.0542	23.998	23.7045	24.6107	23.9126	23.4842	23.206	23.9969	23.7601	24.1792	23.5892	24.2394	23.1841	23.7215	23.7216	23.5663	22.8438	23.9905
P51859;E0CXA0	Hepatoma-derived growth factor	Hdgf	0.117125	0.506446	0.311569		0.483296		22.8103	22.8976	23.0489	22.7632	22.8885	22.8129	23.0589	22.6985	22.7938	22.4587	5	5	5	28.7	28.7	28.7	26.268	0	19.376	229260000	31	22.8633	22.7215	22.8461	22.9024	22.925	22.8653	23.1996	23.017	22.9301	22.6164	22.8542	22.8189	22.9688	22.9952	22.7016	22.7604	22.7808	22.8975	22.6103	23.3765
Q99L13	3-hydroxyisobutyrate dehydrogenase, mitochondrial	Hibadh	0.250543	1.04901	0.0893292		0.154667		19.9494	20.0399	20.0942	20.0427	19.6539	19.4423	19.9805	19.8891	19.5259	19.6895	3	3	3	12.8	12.8	12.8	35.44	0	3.744	28233000	5	20.0663	19.7946	19.9873	19.9906	20.1827	19.9465	20.3749	19.9403	19.9675	19.4354	19.8103	20.8823	19.0472	20.0867	19.8278	NaN	19.1062	19.7785	19.8878	19.8842
A0A1L1SR69;A0A1L1ST61;A0A1L1SV00;Q8R472;Q9JLR9	HIG1 domain family member 1A, mitochondrial	Higd1a	0.287722	0.246958	0.566293		0.547339		NaN	NaN	19.3933	20.1813	21.1308	NaN	20.0077	19.4514	20.0515	20.2791	1	1	1	28.6	28.6	28.6	6.91	0	2.4076	13741000	1	NaN	NaN	NaN	NaN	NaN	NaN	NaN	19.3933	NaN	20.1813	NaN	NaN	21.1308	NaN	NaN	NaN	NaN	NaN	20.0098	19.9868
P70349;B0R1E3	Histidine triad nucleotide-binding protein 1	Hint1	-0.265842	0.482483	0.329243		0.340234		23.3204	24.5425	24.1383	23.7193	24.4518	23.8688	24.5106	24.4572	24.3446	24.3203	4	4	4	58.7	58.7	58.7	13.777	0	75.006	561440000	34	24.0936	22.0319	23.8358	24.4809	24.6041	NaN	24.3834	24.21	23.8215	23.9658	23.9696	23.2225	24.4687	24.6354	24.2513	24.5542	22.5453	24.5069	24.2914	25.0037
P43276	Histone H1.5	Hist1h1b	-0.0660862	0.157716	0.695479		0.770424		24.0183	24.3849	24.1586	24.1727	24.1654	24.2048	24.3057	23.9686	24.7913	23.96	3	3	3	17.5	17.5	17.5	22.576	0	15.999	595880000	57	24.1547	23.7588	24.1415	24.3229	24.5871	24.2447	24.1592	24.1933	24.1231	24.1029	24.0997	24.3155	24.1234	24.1908	24.1819	24.2429	24.2937	24.0777	24.2381	24.3848
P15864	Histone H1.2	Hist1h1c	-1.57721	0.684575	0.20674		0.102136		20.8092	22.7675	19.5945	22.9417	17.5313	22.5504	22.1117	23.332	23.1928	20.3435	6	1	1	24.1	7.5	7.5	21.266	0	4.8064	121230000	8	22.1563	NaN	19.462	NaN	22.7675	NaN	18.4639	17.8305	22.4891	23.0836	22.2046	23.5369	NaN	17.5313	NaN	22.3161	23.1573	22.1777	NaN	22.1659
P43277	Histone H1.3	Hist1h1d	0.109869	0.329915	0.467827		0.58622		26.7927	27.2088	26.9557	26.7775	26.9116	26.8581	26.764	26.6088	27.2647	26.6014	6	6	1	23.1	23.1	7.2	22.099	0	323.31	3769000000	94	26.8385	26.721	26.8187	27.1056	27.1745	27.3465	27.0213	26.956	26.8897	26.6359	26.794	26.9027	26.7932	26.8942	27.0474	26.8464	26.98	26.7479	27.0081	26.6393
P43274	Histone H1.4	Hist1h1e	-0.0175045	0.0438697	0.903921		0.939801		24.5483	24.7698	24.6594	24.3251	24.3284	24.6266	24.5059	24.3572	24.9182	24.3106	6	2	2	23.3	12.8	12.8	21.977	0	143.25	794690000	40	24.4265	24.5585	24.66	24.7617	24.7778	24.7698	24.6844	24.7516	24.5421	24.2716	24.2439	24.4598	24.1359	24.4009	24.4485	24.5276	24.6341	24.7181	24.5452	24.525
C0HKE9;C0HKE8;C0HKE7;C0HKE6;C0HKE5;C0HKE4;C0HKE3;C0HKE2;C0HKE1;Q8CGP6;Q8CGP7;Q8CGP5;Q8BFU2;A0A0N4SV66;Q8R1M2;Q8CGP4	Histone H2A type 1-H;Histone H2A type 1-K;Histone H2A type 1-F;Histone H2A type 3;Histone H2A.J;Histone H2A	Hist1h2ah;Hist1h2ak;Hist1h2af;Hist3h2a;H2afj;Hist1h2aa	0.179104	0.185027	0.65309		0.662649		31.0858	31.4907	31.7643	31.556	31.1825	30.1372	32.4166	31.0963	31.3433	31.1903	9	9	2	65.4	65.4	44.6	14.135	0	323.31	99288000000	500	31.5098	30.6769	31.0705	31.426	31.9618	31.0844	31.3972	32.7249	31.1707	31.7312	31.3875	31.5493	31.1234	31.489	30.9352	30.2577	30.1072	30.0467	32.2713	33.1835
Q6ZWY9;Q64525;Q64478;P10854	Histone H2B type 1-C/E/G;Histone H2B type 2-B;Histone H2B type 1-H;Histone H2B type 1-M	Hist1h2bc;Hist2h2bb;Hist1h2bh;Hist1h2bm	0.382614	0.433461	0.368586		0.32834		31.2287	30.5519	32.3672	32.6438	31.832	31.3336	31.2299	31.8219	31.2796	31.0456	8	8	1	52.4	52.4	17.5	13.906	0	323.31	125770000000	769	31.5598	31.6083	30.518	32.1199	31.1425	28.3934	32.7188	32.0718	32.311	32.9723	31.6594	33.2997	31.6058	31.8264	32.0639	30.8098	31.5138	31.6772	32.0183	31.6734
P68433	Histone H3.1	Hist1h3a	-0.763283	0.361246	0.435266		0.343437		17.3423	17.1134	NaN	17.4983	NaN	16.8147	20.0254	16.9487	18.5364	NaN	7	1	1	51.5	23.5	23.5	15.404	0	8.491	17111000	1	16.6668	18.4993	16.8608	17.1134	NaN	NaN	NaN	NaN	NaN	16.7806	18.4291	17.2853	NaN	NaN	NaN	16.6754	NaN	16.9541	17.9929	18.6494
P62806	Histone H4	Hist1h4a	-0.234567	0.278787	0.526276		0.527926		28.1586	28.1026	28.5358	28.4333	28.4727	28.0106	27.6313	28.8758	29.5816	28.7765	9	9	9	58.3	58.3	58.3	11.367	0	323.31	13037000000	173	27.9503	28.3185	28.207	27.2003	28.5714	28.5361	28.5101	28.4713	28.626	28.4394	28.3332	28.5273	28.3393	28.4332	28.6454	27.5747	28.1761	28.2811	28.3905	28.2181
Q64523;Q6GSS7	Histone H2A type 2-C;Histone H2A type 2-A	Hist2h2ac;Hist2h2aa1	-0.586782	0.332968	0.46455		0.390468		26.797	25.2526	28.0266	27.9168	26.9437	26.7306	29.7603	26.5385	27.2292	27.6119	7	3	0	58.1	25.6	0	13.988	0	323.31	8692300000	107	27.4233	25.5987	27.3689	27.9525	22.8144	24.9908	27.3061	28.8085	27.9652	29.2767	26.7922	27.6815	26.4389	26.6732	27.7191	26.9463	27.0249	26.2208	30.214	29.45
P17710-3;G3UVV4;P17710-4;P17710;P17710-2	Hexokinase-1;Hexokinase	Hk1	-0.217652	0.789754	0.162273		0.245195		23.6746	23.6992	23.732	24.2703	23.6262	23.9602	24.2142	24.0848	23.7565	24.0749	15	15	11	20.6	20.6	15.5	102.3	0	323.31	503690000	46	24.2381	23.1152	23.6706	23.825	23.7403	23.5323	23.9021	23.9795	23.3145	24.5524	24.0657	24.1929	23.3985	23.7187	23.7614	23.8423	23.945	24.0931	24.1287	24.0683
A0A0J9YUD8;A0A0J9YUZ4;P63158;D3YZ18;D3YVC6	High mobility group protein B1	Hmgb1	-0.468839	1.24255	0.0572065		0.0561905		25.3957	25.4177	24.9803	25.2506	24.2922	25.5198	25.4494	25.6106	25.4959	25.605	8	5	5	46.8	36.8	36.8	19.774	0	53.305	1421500000	55	25.3742	25.3229	25.49	25.4253	25.4634	25.3645	24.8299	24.7959	25.3152	25.2014	25.2789	25.2716	25.3888	22.2984	25.1894	25.5414	25.7878	25.2303	25.5455	25.5385
P30681;A0A1B0GQX9	High mobility group protein B2	Hmgb2	-0.0820633	0.322249	0.476158		0.643068		26.1103	26.5224	26.4226	26.4055	26.4173	26.6561	26.649	26.3465	26.4107	26.2259	8	8	5	37.6	37.6	29.5	24.162	0	100.71	2821100000	85	26.323	26.5	25.5078	26.3248	26.5926	26.6498	26.4967	26.6814	26.0896	26.2308	26.3454	26.6402	26.5316	26.4241	26.2961	26.8326	26.6046	26.5313	26.3997	26.5306
G3X9Q3;D3Z7R7;Q3TBD2;Q3TBD2-2	Minor histocompatibility protein HA-1	Hmha1	0.565181	0.573094	0.267243		0.202462		20.1259	20.3432	NaN	20.2639	20.386	20.1113	20.0342	20.0385	18.0819	20.3069	3	3	3	3	3	3	122.86	0	2.9639	27597000	3	20.247	20.0048	NaN	20.3281	20.3764	20.3251	NaN	NaN	NaN	20.5114	20.278	20.0022	NaN	NaN	20.386	20.1734	20.1495	20.011	20.1592	19.9831
Q9CX86	Heterogeneous nuclear ribonucleoprotein A0	Hnrnpa0	0.182927	0.87063	0.134701		0.262456		24.0982	23.7065	23.8018	23.9704	24.0412	23.9701	23.5459	23.563	23.8326	23.7919	4	4	4	21	21	21	30.53	0	81.26	467310000	22	23.9224	23.8817	24.4906	23.6652	23.5277	23.9266	23.7323	23.869	23.8041	24.4638	24.4514	22.9961	23.7646	24.1571	24.202	23.9271	24.3198	23.6634	23.3124	23.5689
Q5EBP8;P49312;P49312-2	Heterogeneous nuclear ribonucleoprotein A1;Heterogeneous nuclear ribonucleoprotein A1, N-terminally processed	Hnrnpa1	-0.0843849	0.978131	0.105164		0.470263		27.9189	27.913	27.9822	27.9084	27.9836	28.1017	28.0996	28.0367	28.0238	27.8661	14	13	13	43.4	41.3	41.3	38.833	0	323.31	8151700000	195	28.0153	27.792	27.9493	27.9796	28.1216	27.6378	27.8151	28.0626	28.0688	27.8345	27.9376	27.953	27.8765	28.1859	27.8885	27.915	28.2832	28.1069	28.0487	28.1246
Q60668-3;Q60668;F6ZV59;G5E8G0;G3X9W0;Q60668-4;Q60668-2;E9Q5B6	Heterogeneous nuclear ribonucleoprotein D0	Hnrnpd	-0.301242	1.25105	0.056098		0.0973592		25.5869	25.1219	25.0389	25.5184	25.488	25.851	25.4419	25.69	25.5239	25.7536	7	7	7	25.8	25.8	25.8	32.754	0	92.365	1865900000	79	25.7676	25.2702	25.7229	24.9392	24.8725	25.5541	25.728	24.6307	24.7581	25.3722	25.4653	25.7177	25.4851	25.509	25.4698	25.6427	25.9495	25.9607	25.6535	24.9577
Q8C2Q7;O35737	Heterogeneous nuclear ribonucleoprotein H;Heterogeneous nuclear ribonucleoprotein H, N-terminally processed	Hnrnph1	0.212986	0.595668	0.253707		0.31782		25.2879	25.5072	24.6333	25.1423	25.3143	25.1806	24.8216	24.7199	24.9451	25.1529	13	13	7	33.9	33.9	19.1	51.217	0	323.31	1131300000	67	25.142	25.1996	25.5222	25.5813	25.2043	25.736	25.2248	25.2362	23.4389	25.1338	24.8863	25.4069	25.0747	25.4625	25.4056	25.032	25.3659	25.1439	24.3149	24.8862
B2M1R6;P61979-3;P61979;P61979-2;H3BLL4;A0A286YDM3;H3BK96;H3BKD0	Heterogeneous nuclear ribonucleoprotein K	Hnrnpk	0.0660419	0.426235	0.37477		0.644938		26.4349	26.7373	26.7513	26.7555	26.7738	26.561	26.6238	26.7022	26.562	26.6734	14	14	14	45.7	45.7	45.7	48.562	0	266.8	3206600000	104	26.9151	26.4906	25.899	26.5955	26.7695	26.8469	26.7016	26.7503	26.8019	26.6999	26.7038	26.8629	26.5448	26.8203	26.9562	26.6048	26.467	26.6112	26.6178	26.8017
Q921F4	Heterogeneous nuclear ribonucleoprotein L-like	Hnrnpll	0.0889309	0.231653	0.586607		0.681181		20.943	20.35	20.5587	20.8909	20.5084	20.3429	20.8937	20.7165	20.3489	20.5044	3	3	3	9.3	9.3	9.3	64.124	0	5.4874	37992000	16	21.0822	20.7136	21.0334	NaN	20.0718	20.6282	20.4654	20.6658	20.545	21.0348	20.747	NaN	20.3912	20.6256	NaN	20.4454	20.2404	NaN	NaN	20.895
Q8VHM5;A2AW41;F7B5B5		Hnrnpr	-0.271626	0.52849	0.296149		0.309958		20.6727	19.8415	20.7867	20.4513	20.6617	20.567	21.3285	20.7993	20.2659	20.8113	8	4	4	13.4	6.6	6.6	70.887	0	4.2078	52007000	9	20.616	20.8314	20.5707	20.6934	18.0642	20.7668	20.8459	20.7651	20.7491	20.7024	20.406	20.2454	20.526	20.2796	21.1794	20.4826	20.868	20.3504	20.9555	21.159
Q8VEK3;Q8VEK3-2	Heterogeneous nuclear ribonucleoprotein U	Hnrnpu	0.00613937	0.0434665	0.90476		0.964728		27.1628	27.2768	27.0145	27.0496	27.1444	27.1328	27.156	27.1585	27.058	27.112	24	24	24	37	37	37	87.917	0	323.31	4599800000	253	27.028	27.2279	27.2323	27.1862	27.3295	27.3147	26.9172	27.0787	27.0476	26.9795	26.979	27.1905	27.1868	27.0666	27.1798	27.0337	27.311	27.0537	27.2088	27.1634
Q8VDM6-2;Q8VDM6	Heterogeneous nuclear ribonucleoprotein U-like protein 1	Hnrnpul1	0.076712	0.343338	0.453589		0.645017		21.9973	22.3057	22.1764	21.9053	21.9395	22.1076	21.8286	21.9769	21.8867	22.141	5	5	5	7.8	7.8	7.8	85.045	0	6.9556	128730000	66	21.9375	21.9827	22.0716	22.2631	22.4917	22.1624	22.193	22.2672	22.0691	21.8173	21.6795	22.2192	22.0764	21.8049	21.9372	21.9853	22.0962	22.2413	21.6506	21.7831
P08113;F7C312	Endoplasmin	Hsp90b1	0.0416168	0.402069	0.396215		0.740112		28.4306	28.5577	28.4405	28.3006	28.4761	28.4435	28.3615	28.4476	28.3472	28.3976	32	31	31	49.1	47.6	47.6	92.475	0	323.31	11039000000	363	28.3622	28.4229	28.5065	28.4937	28.6209	28.5586	28.5044	28.3555	28.4617	28.2239	28.313	28.3649	28.371	28.446	28.6113	28.4836	28.4894	28.3576	28.2741	28.4859
P38647	Stress-70 protein, mitochondrial	Hspa9	-0.00802994	0.0532565	0.884593		0.95422		26.4748	26.5147	26.5075	26.4414	26.364	26.3233	26.3962	26.5394	26.5544	26.5293	23	23	23	47.9	47.9	47.9	73.46	0	323.31	2892200000	294	26.3843	26.5002	26.5399	26.4069	26.5939	26.5433	26.4591	26.4743	26.5892	26.4512	26.4838	26.3892	26.2117	26.3574	26.523	26.3814	26.3458	26.2427	26.5177	26.3489
Q64433;Q9JI95	10 kDa heat shock protein, mitochondrial	Hspe1;Cpn10-rs1	-0.0510677	0.0991665	0.795854		0.84751		26.4532	26.3807	26.5923	26.7643	26.0438	26.6035	26.4512	26.7494	25.9456	26.7399	6	6	6	59.8	59.8	59.8	10.963	0	323.31	2983400000	62	25.7086	26.8709	26.7802	27.1104	26.6887	25.3429	26.7429	26.5999	26.434	26.4752	26.8184	26.9993	25.5966	25.8338	26.7011	26.7886	26.6442	26.3779	26.5416	26.3811
Q9JKR6	Hypoxia up-regulated protein 1	Hyou1	-0.374525	0.967412	0.107792		0.111814		23.8774	23.6042	22.9987	23.4303	23.584	24.1195	24.0094	24.1897	23.4339	23.6147	10	10	10	13.3	13.3	13.3	111.18	0	56.219	427320000	44	23.5984	23.6968	24.3369	22.695	24.1361	23.9815	23.4863	22.187	23.3226	23.7654	23.6182	22.9074	23.7754	23.189	23.7877	24.3449	24.2926	23.721	23.9426	24.0237
Q9CR41;Q9CR41-2	Huntingtin-interacting protein K	Hypk	-0.2566	1.04165	0.0908557		0.151984		21.1119	20.9318	20.5165	21.1966	20.8104	20.9885	21.2306	21.1415	21.1453	21.3444	2	2	2	27.9	27.9	27.9	14.679	0	3.0787	62845000	16	20.9012	NaN	21.3225	20.9977	NaN	20.8659	20.7081	20.325	NaN	22.3512	20.7018	20.5369	20.9191	20.6139	20.8981	21.4357	20.8932	20.6365	21.0978	21.0115
Q8BIJ6;E9PWN2	Isoleucine--tRNA ligase, mitochondrial	Iars2	0.118552	0.584487	0.260324		0.451237		20.6098	20.5527	20.8955	20.4029	20.538	20.2839	20.564	20.4465	20.5786	20.5331	4	4	4	4.5	4.5	4.5	112.8	0	3.606	45175000	5	20.6165	20.86	20.353	20.2687	20.6932	20.6962	21.1896	20.7836	20.7134	20.6564	20.7069	19.8452	20.6065	20.577	20.4304	20.124	20.3027	20.4249	20.5758	20.6074
F6RPJ9;Q9JHR7	Insulin-degrading enzyme	Ide	-0.124599	0.573432	0.267035		0.443501		22.1811	21.99	22.1755	22.0666	22.1224	22.4285	22.1788	22.0341	22.0237	22.4936	9	9	9	9.9	9.9	9.9	114.15	0	10.193	144780000	40	21.8984	22.3722	22.2728	22.0561	22.2049	21.7091	22.1722	22.2824	22.0718	21.8856	22.1385	22.1757	22.2077	22.0972	22.0623	22.5105	22.4151	22.3599	22.1325	22.2595
Q91VA7;V9GXV0	Isocitrate dehydrogenase [NAD] subunit, mitochondrial	Idh3b	0.14204	0.536142	0.290977		0.426566		21.1377	21.2274	21.0877	21.1045	21.1175	20.5431	21.0029	21.06	21.296	21.0626	4	4	4	13	13	13	42.194	0	4.7997	68090000	22	21.1561	21.2206	21.0364	21.3155	21.0127	21.3539	21.1554	20.7993	21.3083	21.1881	21.0395	21.0858	21.3157	20.9919	21.045	20.639	20.5705	20.4197	20.838	21.1929
P70404	Isocitrate dehydrogenase [NAD] subunit gamma 1, mitochondrial	Idh3g	0.291489	0.98591	0.103298		0.142608		21.8378	21.6342	21.9084	22.1851	21.5035	21.4829	21.6894	21.6238	21.1241	21.6913	4	4	4	14.5	14.5	14.5	42.785	0	4.0328	103010000	8	22.0321	21.9379	21.5433	21.7343	21.8267	21.3416	21.9035	21.8172	22.0046	22.1117	21.9384	22.5051	21.4853	21.6608	21.3643	21.675	21.5359	21.2378	21.5903	21.801
G3XA48;P58044;H3BLF8	Isopentenyl-diphosphate Delta-isomerase 1	Idi1	-0.252958	0.808824	0.155302		0.211199		23.0128	22.9958	23.3555	22.7965	22.9689	23.469	23.6704	22.9369	23.0612	23.2567	4	4	4	21.2	21.2	21.2	32.477	0	10.407	305090000	38	23.0462	23.237	22.7551	23.0251	22.9868	22.9755	23.258	23.7765	23.0322	23.0829	22.9717	22.3348	23.0167	23.0586	22.8314	23.768	23.302	23.3369	23.7609	24.131
Q9D8C4;D6RFB1	Interferon-induced 35 kDa protein homolog	Ifi35	-0.456297	0.413283	0.386115		0.328365		21.1567	18.5012	19.5275	19.5296	20.4485	20.4989	20.8055	20.2685	20.3265	19.5455	2	2	2	9.8	9.8	9.8	31.875	0	6.3956	44484000	5	21.4343	21.337	20.6989	19.7926	NaN	17.2099	18.123	20.2856	20.1738	20.4454	20.6663	17.477	20.4485	NaN	NaN	20.8855	20.701	19.91	21.249	20.6392
Q07113	Cation-independent mannose-6-phosphate receptor	Igf2r	-0.00029068	0.00213794	0.995089		0.997813		22.4338	22.4262	22.4781	22.5786	22.4399	22.366	22.5451	22.5407	22.4088	22.4974	12	12	12	5.4	5.4	5.4	273.81	0	11.627	171890000	44	22.3216	22.4128	22.567	22.1628	22.4759	22.64	22.4679	22.4979	22.4684	22.6389	22.423	22.6738	22.6489	22.4196	22.2512	22.1628	22.6105	22.3247	22.4646	22.5329
Q9Z1M8	Protein Red	Ik	0.246423	0.247674	0.565362		0.557619		NaN	20.1398	19.5747	19.2358	19.9485	20.0795	18.346	20.0219	19.1783	19.7657	1	1	1	1.6	1.6	1.6	65.615	0.0053512	1.7016	18174000	8	NaN	NaN	NaN	20.1398	NaN	NaN	19.4584	19.5673	19.6984	19.7569	19.445	18.5053	20.1073	19.972	19.7664	20.0626	20.2513	19.9246	16.2438	NaN
Q9CXY6	Interleukin enhancer-binding factor 2	Ilf2	-0.131723	0.257717	0.552437		0.610955		22.0347	21.7741	22.3588	21.3082	22.3374	22.325	21.8886	21.9454	22.0836	22.2293	4	4	4	14.4	14.4	14.4	43.062	0	4.7494	147630000	12	20.2444	23.0091	22.8506	21.923	22.6045	20.7949	22.3027	22.5208	22.2529	18.9477	22.6153	22.3617	22.7458	22.3004	21.9661	21.7353	21.9306	23.3091	21.5746	21.4878
Q924B0;O55023;Q80ZJ2	Inositol monophosphatase 1	Impa1	0.300098	0.642017	0.228025		0.240582		21.4478	21.7394	21.3586	21.6055	21.456	21.6054	20.3826	21.4777	21.1988	21.4424	4	4	4	16.6	16.6	16.6	30.429	0	4.9214	81750000	16	21.4953	21.4331	21.4151	NaN	21.6244	21.8545	21.2918	21.3539	21.4301	21.5801	21.439	21.7973	21.429	21.3301	21.609	21.533	21.4559	21.8272	21.4675	18.3733
E0CYE2;F7DEU6;P50096	Inosine-5-monophosphate dehydrogenase;Inosine-5-monophosphate dehydrogenase 1	Impdh1	-0.387814	1.08747	0.0817584		0.0908333		20.6498	20.7271	19.9432	20.9382	20.8804	21.1783	20.9457	21.2126	20.934	20.8072	5	4	4	15.5	13.9	13.9	52.47	0	5.0847	56823000	16	20.6479	20.6967	20.6048	20.6617	20.6167	20.9031	20.858	19.0284	NaN	20.9704	20.8461	20.998	20.9503	20.8351	20.8558	21.181	21.2038	21.1502	20.5953	21.4953
Q80UK8-2;Q80UK8	Integrator complex subunit 2	Ints2	0.793415	0.31224	0.487259		0.400795		20.1917	23.8291	21.695	NaN	20.007	NaN	20.2701	20.7288	20.9131	NaN	1	1	1	10.1	10.1	10.1	44.026	0.0027778	1.8405	39357000	2	20.1917	NaN	NaN	23.8291	NaN	NaN	22.5756	21.4682	21.0413	NaN	NaN	NaN	20.007	NaN	NaN	NaN	NaN	NaN	21.0823	19.3211
Q8VI75	Importin-4	Ipo4	-0.166822	0.270848	0.535984		0.573072		19.7645	19.7008	19.3711	19.4266	19.5602	20.0908	19.7582	19.9879	18.7722	20.0481	2	2	2	1.9	1.9	1.9	119.27	0.0077369	1.5599	22221000	2	19.8139	19.7193	19.7604	19.5672	19.8343	NaN	NaN	19.286	19.4562	19.5433	19.5418	19.1947	19.3617	NaN	19.7587	19.9919	20.2728	20.0079	19.7798	19.6772
Q9EPL8	Importin-7	Ipo7	0.081094	0.0704296	0.850296		0.865263		23.1719	23.226	22.4139	22.916	22.1326	22.9275	23.8443	21.6794	22.6694	22.3344	8	8	7	12.3	12.3	11.4	119.49	0	68.89	248550000	27	23.1047	23.1439	23.2671	24.6424	23.0896	21.9459	22.1518	22.1608	22.929	23.1046	22.9291	22.7143	22.1411	22.0892	22.1676	23.3264	23.1831	22.273	23.721	24.0026
E9QKZ2;Q91YE6;E0CY46;F6TLX3;E0CXB2	Importin-9	Ipo9	0.0310127	0.063991	0.862996		0.906609		20.795	20.4157	20.2963	20.0775	20.5368	20.0528	20.231	20.3292	20.754	20.5992	2	2	2	3.6	3.6	3.6	115.95	0	3.4761	36493000	11	21.0022	20.5879	NaN	20.4241	20.4073	NaN	20.2963	NaN	NaN	20.3262	20.219	19.6872	20.605	20.5232	20.4821	20.1818	20.3813	19.5951	20.1102	20.0092
A0A1Y7VK19;Q9DCB8	Iron-sulfur cluster assembly 2 homolog, mitochondrial	Isca2	-0.0771339	0.408178	0.390681		0.61577		19.3898	19.0297	19.4106	19.4271	19.3371	19.3385	19.4461	19.5337	19.2984	19.3633	2	2	2	16.4	16.4	16.4	15.718	0.00073964	2.1414	20487000	5	19.4066	19.11	19.6529	19.3604	19.4888	18.2399	19.4376	19.4184	19.3759	19.4173	19.3968	19.4672	19.4619	19.3564	19.1929	19.2914	19.4229	19.3012	19.3147	19.7219
P85094	Isochorismatase domain-containing protein 2A, mitochondrial	Isoc2a	0.462841	0.497088	0.318355		0.26604		21.3731	20.8274	22.7244	21.9612	21.9182	20.1597	21.4775	21.3544	21.6255	21.8729	3	3	3	32	32	32	22.417	0	4.7652	69324000	5	21.0206	NaN	21.7256	NaN	20.201	21.4538	22.9469	NaN	22.5018	21.4746	22.6934	21.7157	NaN	22.8743	20.9621	20.4443	19.7576	20.2771	NaN	21.3723
Q9JHU9	Inositol-3-phosphate synthase 1	Isyna1	-0.170996	0.396123	0.401677		0.46376		21.6967	21.9196	22.1888	21.7693	22.1377	22.2526	22.4113	22.2195	21.4616	22.2219	5	5	5	15.3	15.3	15.3	60.931	0	6.3223	149690000	12	21.5534	21.3372	22.1995	21.5142	21.7274	22.5173	22.4002	21.9011	22.2651	22.0808	22.513	20.714	22.2822	21.8264	22.3044	22.1588	22.4145	22.1847	22.1967	22.9288
Q9D892	Inosine triphosphate pyrophosphatase	Itpa	0.0145458	0.0157087	0.964476		0.97079		20.6202	20.7793	19.5963	20.9316	20.9001	20.617	20.8024	20.5691	19.8148	20.9513	2	2	2	15.2	15.2	15.2	21.897	0.0027797	1.8406	39761000	3	NaN	NaN	20.6202	20.8389	20.6419	20.857	NaN	18.1162	21.0763	20.9316	NaN	NaN	20.7608	20.7411	21.1982	20.9024	20.7163	20.2322	20.2085	21.1982
Q8R2P8;Q99MN1	Lysine--tRNA ligase	Kars	-0.394968	0.813347	0.153693		0.142775		23.1423	23.7367	23.6863	23.5376	23.7385	24.304	24.1223	23.0766	24.1462	24.1673	10	10	10	15.5	15.5	15.5	71.29	0	15.58	459220000	47	23.905	23.2251	22.2969	23.7768	23.8022	23.6312	23.9045	23.6802	23.4742	23.8252	23.8306	22.957	23.5806	23.9504	23.6846	24.1886	24.3786	24.3448	24.2031	24.1603
D3Z0U5;D6RGM7;D3Z4J2;A0A0G2JFY0;A0A0A0MQ80;Q9D3R6-3;Q9D3R6;Q3UMC0	Katanin p60 ATPase-containing subunit A-like 2;Spermatogenesis-associated protein 5	Katnal2;Spata5	0.471448	0.600954	0.250637		0.204646		22.2045	20.7806	21.2327	NaN	22.2286	21.2055	21.8077	20.8519	20.8629	20.9727	1	1	1	4.3	4.3	4.3	31.2	0.0007446	2.1686	72103000	9	23.0079	21.401	NaN	20.9727	NaN	20.5886	21.259	21.3149	21.1241	NaN	NaN	NaN	22.5141	20.8595	23.3123	20.5451	NaN	21.8659	22.6163	21.0177
Q3UPV6;P62482;E0CXZ9	Voltage-gated potassium channel subunit beta-2	Kcnab2	0.276112	0.469205	0.339465		0.341947		23.3647	22.7863	23.2646	23.6697	23.0826	22.0892	23.4298	23.0148	23.0601	23.1936	6	6	6	25.2	25.2	25.2	39.308	0	9.8708	308040000	52	23.1017	23.4885	23.504	23.4863	22.307	22.5655	23.3214	23.2206	23.2519	23.3979	23.4767	24.1345	23.4147	22.5562	23.2771	19.5606	23.0949	23.6121	23.2515	23.4646
G8JL40;A3KG93;Q6ZQ88;F6Z4I3	Lysine-specific histone demethylase 1A	Kdm1a	0.295089	0.75195	0.177031		0.202137		19.7458	20.1232	19.5979	20.1992	19.8132	19.6387	19.8707	19.7767	19.117	NaN	4	4	4	6.9	6.9	6.9	75.422	0	4.0257	21164000	11	19.7371	20.0442	19.456	20.1152	20.1118	20.1427	19.727	19.536	19.5308	20.2223	20.3195	20.0559	NaN	19.7656	19.8608	19.6387	NaN	NaN	19.9056	19.6535
Q60749	KH domain-containing, RNA-binding, signal transduction-associated protein 1	Khdrbs1	-0.568656	0.699694	0.199667		0.144197		23.6676	22.1356	23.147	23.4611	21.952	22.8636	23.4002	23.1305	23.9255	23.8868	2	2	2	12.2	12.2	12.2	48.37	0	7.3283	348070000	29	23.2862	23.7332	23.9833	21.7951	22.5213	22.0904	22.9681	22.9646	23.5085	23.8072	23.8638	22.7124	23.2019	23.3768	19.2772	23.2388	22.9413	22.4107	23.3106	23.3789
Q6P9P6	Kinesin-like protein KIF11	Kif11	-0.693674	0.827184	0.148873		0.094303		22.5837	22.8776	21.2668	21.4302	22.9623	22.3189	22.7278	23.5407	22.596	23.4056	4	4	4	4.9	4.9	4.9	118.03	0	4.2827	236420000	16	22.4437	23.6754	21.632	23.5148	23.3941	21.7237	20.1391	19.9933	23.6682	21.8095	20.8984	21.5826	23.5308	21.7222	23.634	22.2012	22.9179	21.8377	23.5496	23.272
P52293	Importin subunit alpha-1	Kpna2	-0.677218	0.691706	0.203373		0.133739		20.9836	21.1258	19.3796	21.3185	21.077	22.2201	20.2786	21.5224	21.2726	21.977	3	3	3	7.8	7.8	7.8	57.927	0	3.2238	71964000	17	21.4284	20.503	21.0195	21.3256	20.9261	NaN	19.3974	19.3619	NaN	21.5356	21.2566	21.1634	21.077	NaN	NaN	22.4437	22.2984	21.9183	21.3246	17.6698
O35344	Importin subunit alpha-4	Kpna3	-0.186545	0.18566	0.652138		0.659833		21.169	21.9445	20.0878	21.5187	21.0572	22.1731	21.5065	20.971	21.3614	20.6978	5	5	2	12.3	12.3	5.2	57.772	0	6.1913	101170000	14	22.1282	22.9757	18.403	21.2875	23.0505	21.4955	19.3934	21.5057	19.3644	21.3677	21.9068	21.2816	20.8878	21.1594	21.1242	21.423	22.6652	22.4312	19.2969	21.8264
P70168	Importin subunit beta-1	Kpnb1	-0.0203102	0.124609	0.75057		0.893778		25.7782	25.8432	25.5869	25.7053	25.6339	25.6452	25.8008	25.8025	25.6177	25.7828	20	20	20	36	36	36	97.183	0	323.31	1710200000	179	25.7153	25.7567	25.8624	25.8565	25.8235	25.8497	25.5452	25.6106	25.6049	25.6824	25.6343	25.7992	25.5238	25.6488	25.729	25.5183	25.9552	25.4622	25.7825	25.8521
Q3V558;A2A5N8	Lethal(3)malignant brain tumor-like protein 1	L3mbtl1	0.26161	0.0826841	0.826639		0.81468		23.0572	22.8484	NaN	22.1127	23.1218	23.8919	25.0027	23.3879	19.9651	20.3695	1	1	1	7	7	7	26.16	0.0014358	1.987	435710000	4	22.1636	NaN	23.9508	NaN	23.6687	22.0281	NaN	NaN	NaN	24.0392	20.1862	NaN	NaN	19.3585	26.8852	23.7037	24.0801	NaN	24.035	23.9703
[truncated: 505 more rows]
[truncated: 12 more columns]
